# Supplementary material for: Transcriptional programs mediating neuronal toxicity and altered glial–neuronal signaling in a Drosophila knock-in tauopathy model
Source: Genome Res. 2024 Apr;34(4):590–605. doi: 10.1101/gr.278576.123 (PMC11146598; doi:10.1101/gr.278576.123)
Supplement: Supplement 3 [file Supplemental_Table_S2.xlsx]

## Sheet: Unannotated_0
Supplemental_Table_S2:Normalized read counts of the identified genes in all the clusters.
Each tab on the excel sheet contains the normalized read counts for both control and tau P251L KI in the identified cluster.
geneID	control_normalizedReadsCounts	tau P251L KI_normalizedReadsCounts
FBgn0250732	0.193422	0.172691
FBgn0037409	0.00659663	0.00365861
FBgn0027948	0.808211	0.857397
FBgn0038675	0.272192	0.22618
FBgn0000500	0.00265166	0.0150336
FBgn0037610	0.0659939	0.0521848
FBgn0267571	0.377062	0.358649
FBgn0261859	0.939599	0.84546
FBgn0037363	1.15833	1.17657
FBgn0039552	0.0116505	0.0183463
FBgn0039732	0.134452	0.0630712
FBgn0038224	1.26147	1.10343
FBgn0264776	0.0232746	0.000522087
FBgn0038525	0	0.000591942
FBgn0261436	0.124445	0.09192
FBgn0038814	0.0774132	0.0159518
FBgn0286871	0.00543614	0.00478208
FBgn0038279	0.000919464	0.00118677
FBgn0037625	0.605782	0.557788
FBti0019436	0.0271105	0.0294539
FBgn0027574	0.183012	0.191792
FBgn0260746	0.000989669	0.00136079
FBgn0037930	0.210965	0.237734
FBgn0027095	0.4201	0.373996
FBgn0051450	0.444219	0.326466
FBgn0037794	0.225795	0.22214
FBgn0039229	1.41323	1.35527
FBti0019348	0.0149359	0
FBgn0038737	0.0936155	0.0527982
FBti0019411	0.0135101	0.0106311
FBti0020393	0.0268648	0.0109043
FBgn0039291	0.0507518	0.0419141
FBgn0037547	0.00977133	0.00971012
FBgn0038966	0.0236995	0.0459075
FBgn0037690	0.385798	0.32269
FBti0019321	0.00117991	0.0045035
FBgn0038055	0.26994	0.242585
FBgn0261792	0.129246	0.109983
FBgn0040606	0.00249554	0.00912468
FBgn0037709	0.0105511	0.00768697
FBti0062552	0.0766355	0.0518956
FBgn0037777	0.154251	0.109955
FBgn0046685	0.000930973	0.00607652
FBgn0039313	0.000789177	0.00240655
FBgn0004395	0.944434	1.14671
FBgn0266674	0.0957459	0.089862
FBgn0039019	0.146122	0.110445
FBgn0039172	0.342042	0.327651
RR46358-transposable-element	0.598208	0.601855
FBgn0011290	0.673476	0.596025
FBgn0267816	0.00189486	0.0012482
FBgn0037747	0.473963	0.428088
FBgn0039073	0.00147608	0.000872028
FBgn0040256	0.00378475	0.00275199
FBgn0039404	0.165928	0.1164
FBgn0005674	0.13557	0.107353
FBgn0011768	0.0776339	0.0321601
FBgn0037917	0.379555	0.392115
FBgn0086365	0.0105144	0.0100055
FBgn0017567	0.63762	0.529244
FBgn0039290	0.239819	0.195557
FBti0019361	0.00230441	0.00145487
FBgn0051287	0.000503368	0.00559848
FBgn0038577	0.105815	0.0671473
FBgn0037720	0.0213025	0.051218
FBgn0001112	0.0014086	0.00298716
FBgn0038344	0.109076	0.068474
FBgn0037678	0.0274486	0.0333963
FBgn0267709	0.00130805	0.000691007
RR48352-transposable-element	0.0472671	0.0378922
FBgn0051072	0.583099	0.54675
FBgn0013277	0.200873	0.00994404
FBgn0037718	0.130223	0.137512
FBgn0286071	0	0
FBgn0265197	0.0150662	0.00942927
FBgn0003002	0.0653506	0.0796188
FBgn0041588	0.12922	0.0766487
FBgn0039557	0.143741	0.133047
FBti0020309	0.00216389	0.00491925
FBgn0051028	0.000498252	0.000293007
FBgn0266598	0.015437	0.00405513
FBgn0038725	0.797527	0.681127
FBgn0263757	0.00564632	0.0026735
FBgn0039277	0.425908	0.421352
FBgn0039302	0.345125	0.362647
FBgn0039461	0.265155	0.166111
FBgn0037894	0.0683276	0.0456166
FBgn0039817	0.00240135	0.00345257
FBgn0051224	0.862429	0.885855
FBgn0054008	0.00250853	0.0016553
FBgn0013276	2.23082	2.49758
FBgn0039714	0.277737	0.245291
FBgn0037802	0.04493	0.023443
FBgn0039328	0	0.00303683
FBgn0051116	0.00158586	0.0117792
FBgn0266672	0.257328	0.232515
FBgn0037292	0.00368431	0.00308958
FBgn0017550	0.804549	0.818029
FBgn0037679	0.189851	0.256694
FBgn0040609	0.000545883	0.00115727
FBgn0038113	0.00127048	0.000191481
FBgn0014931	0.00036734	0.000708135
FBgn0267408	0.00655234	0.00192075
FBgn0038115	0.00560064	0.00473135
FBgn0038745	0.396046	0.436818
FBgn0038321	0.0935617	0.157892
FBgn0263594	1.06198	1.05709
FBgn0083984	0.123559	0.0955637
FBgn0015568	0.00827453	0.00253744
FBgn0038881	2.08122	1.98958
FBgn0259139	1.22488	1.08494
FBgn0039258	0.0410559	0.0330725
FBgn0039415	0.0142933	0.0118101
FBgn0264427	0.152086	0.137207
FBgn0004841	0.27515	0.248836
FBgn0275433	0.0162358	0.00982443
FBti0019345	0	0.00160975
FBgn0002924	0.0397076	0.0209702
FBgn0051211	1.13929	1.04729
FBgn0267612	0.00716557	0.0106958
FBgn0037993	0.424153	0.381639
FBgn0262962	0.0198087	0.0340754
FBgn0038049	0.274141	0.241856
FBgn0005777	0.207881	0.177599
FBgn0261238	0.77276	0.78908
FBgn0037891	0.756436	0.562784
FBgn0039182	0.156431	0.139529
FBgn0085345	0	0.00325217
FBgn0085383	1.52871	1.45269
FBgn0040080	0.225089	0.233984
FBgn0037383	0.0749343	0.0406809
FBgn0037779	0	0.00646889
FBgn0000533	0.00279784	0.00445617
FBgn0263025	0.0284197	0.0193931
FBgn0264291	0.0524636	0.056176
FBti0019286	0.0143041	0.0241462
FBgn0010340	0.0876495	0.0866876
FBgn0039722	0.0374385	0.114867
FBgn0038490	0.122801	0.0616305
FBgn0265276	1.48629	1.53386
FBgn0014930	0.173451	0.121889
FBgn0038809	0.356334	0.316092
FBgn0038678	0.469426	0.274246
FBgn0037478	0.148711	0.122806
FBgn0038428	0.262784	0.198904
FBgn0038853	1.57174	1.62778
FBgn0038306	0.0671435	0.0368785
FBgn0046876	0.00150441	0.000154602
FBgn0051320	0.165518	0.147017
FBgn0051184	0.108745	0.0886777
FBgn0037276	0.0044072	0.00773835
FBgn0039870	0.120384	0.0879073
FBgn0003165	2.87271	2.78387
FBgn0039463	0.000434609	0.00378609
FBgn0038760	0.0700091	0.0803419
FBgn0002781	1.00912	0.920785
FBgn0039311	0.00313023	0.00405329
FBgn0038034	0.029943	0.023952
FBgn0053970	0	0.000385388
FBgn0038332	0.136092	0.112616
FBgn0024957	0.220082	0.173648
FBgn0023212	0.321961	0.303394
FBti0061713	0.00492082	0.00427139
FBgn0027492	2.06725	2.10386
FBgn0011289	0.311196	0.277683
FBti0019404	0.00504289	0
FBgn0015269	1.07469	1.12114
FBgn0010399	0.896169	0.89313
FBgn0266750	0.501272	0.40906
FBgn0039054	1.67583	1.78547
FBgn0286828	0.160972	0.123437
FBgn0028734	0.867207	0.876837
FBgn0039789	0.0016574	0.00076939
FBgn0037849	0.359045	0.401637
FBgn0011766	1.24121	1.27327
FBgn0267430	0.0625676	0.0604488
FBti0020308	0.000219231	0.00427141
FBgn0051510	0.451752	0.42101
FBti0019447	0.0172088	0.0159609
FBgn0038535	1.07733	1.08092
FBgn0260444	0.212174	0.144568
FBgn0038437	0.117338	0.0660693
FBgn0038369	0.286086	0.214502
FBti0019461	0.329356	0.262016
FBgn0262904	0.00271294	0.00754792
FBgn0263047	0.0291347	0.0347905
FBgn0011785	0.383311	0.382449
FBgn0037705	1.67842	1.72956
FBgn0038454	0.155238	0.185961
FBgn0260743	0.408233	0.368551
FBgn0039879	0.00371611	0.00136708
FBgn0267116	0.00715348	0.0126009
FBgn0039820	0.00284262	0.00569819
FBgn0067629	0.0256903	0.0183261
FBgn0017590	2.14244	2.05314
FBgn0039726	0.121179	0.075485
FBgn0260634	1.22954	1.26208
FBgn0037231	0.662104	0.665303
FBgn0267685	0.00328489	0.00351192
FBgn0037817	0.00395958	0.00652691
FBgn0262858	0.725005	0.634342
FBgn0004876	1.42328	1.38461
FBgn0039685	0.00464381	0.0242916
FBgn0004117	0.0465278	0.0290217
FBgn0037811	0.00912818	0.01235
FBgn0038354	0.00379679	0.0108213
FBgn0037834	0.135941	0.113816
FBgn0003248	0.00075183	0.0450779
FBgn0000723	0.113476	0.111644
FBgn0051030	1.48766	1.4585
FBgn0038199	0.124637	0.0516191
FBgn0037313	0.560347	0.518394
FBgn0037890	0.641792	0.536141
FBgn0039350	0.649405	0.623068
FBgn0037546	0.344917	0.455825
FBgn0015781	0.254391	0.196502
FBgn0002522	0.00999516	0.0136048
FBgn0037737	0.562854	0.562337
FBgn0051551	0.0105454	0.0142251
FBgn0051514	0.0003571	0.00384885
FBti0019380	0.161381	0.0727889
FBgn0039215	0.281536	0.256008
FBgn0264901	0.139497	0.148764
FBgn0037943	0.194538	0.168212
FBgn0038478	0.504126	0.495372
FBgn0028684	0.250604	0.245439
FBgn0051195	0.162543	0.140693
FBgn0028487	0.188358	0.172286
FBgn0002719	0.563859	0.559957
FBgn0027841	0.0879902	0.0649617
FBgn0261479	0.131371	0.0881983
FBgn0039696	0.148388	0.110631
FBgn0038331	0.4186	0.364232
FBgn0051202	0.00299587	0.00335743
FBgn0267118	0.00842846	0.0136055
FBgn0039261	0.552527	0.578137
FBgn0266744	0.0118648	0.0177863
FBgn0267337	0.513582	0.558201
FBgn0037746	0.00280682	0.0165692
FBgn0038854	0.0697418	0.0722346
FBgn0267200	0.00133056	0.00609121
FBgn0037656	0.0469608	0.0365993
FBgn0037700	0.249856	0.199824
FBgn0038839	1.20076	1.42431
FBgn0037466	0.887732	0.796575
FBti0019320	0.000338	0.00494378
FBgn0039101	0.00355705	0.0160169
FBgn0011655	0.497828	0.444408
FBgn0039274	0.0363512	0.0284097
FBgn0039731	0.0256159	0.0229204
FBti0019466	0.0292794	0.0194575
FBgn0039250	0.00500696	0.00486742
FBgn0015513	0.282694	0.287937
FBgn0017581	2.52446	2.60605
FBgn0020249	0.393499	0.359082
FBgn0040600	0.0116782	0.0460836
FBgn0024329	0.392659	0.34812
FBgn0004842	0.0749027	0.0530786
FBgn0039465	1.3054	1.38575
FBgn0013343	2.76879	2.70013
FBgn0002940	0	0.00657206
FBgn0027873	0.0394882	0.0858223
FBgn0038197	0.0497588	0.042984
FBgn0039346	0.919749	0.790039
FBgn0266372	0.000977009	0.00135172
FBgn0038952	0.0899304	0.0996737
FBgn0000139	0.12808	0.126378
FBgn0020238	2.73296	2.7516
FBgn0038476	0.387069	0.458266
FBgn0039341	0.0837286	0.0653518
FBgn0037850	0.0173778	0.0161165
FBgn0037908	0.323411	0.281889
FBgn0037270	0.831332	0.642328
FBgn0038540	0.357444	0.287602
FBgn0038965	0.293896	0.281447
FBgn0039609	0.00153635	0.00485882
FBgn0003268	0.0434233	0.0468882
FBgn0260935	0.144759	0.140184
FBgn0026566	0.31459	0.226683
FBgn0266700	0.0170681	0.0128649
FBgn0037540	0.0535994	0.0523513
FBgn0039703	0.00360538	0
FBgn0039529	0.00176353	0.00189008
FBgn0044871	0.181084	0.160777
FBgn0039674	0.336076	0.302482
FBgn0051522	0.620792	0.611838
FBgn0283535	1.7148	1.6554
FBgn0023083	0.34666	0.326287
FBgn0037902	0.370117	0.326034
FBgn0051133	0.0262267	0.0202065
FBgn0004107	0.0948024	0.0704111
FBti0063150	0.0355169	0.0188404
FBgn0250823	1.88351	1.85344
FBgn0037950	0.0310897	0.0217086
FBgn0037714	0.00488105	0.00491577
RR48301-transposable-element	0.0112474	0.00405573
FBgn0037844	0.0158231	0.0120372
FBgn0267199	0.00192183	0.00043163
FBgn0037883	0.101197	0.0651536
FBgn0039877	0.000411931	0.00136464
FBgn0038206	0.21095	0.185436
FBti0059759	0.0175295	0.057586
FBgn0039764	0.246289	0.284704
FBgn0038402	0.0996025	0.0698059
FBgn0039286	0.31262	0.262398
FBgn0038183	0.110887	0.0627385
FBgn0038412	0.00348649	0.00141712
FBgn0038806	0.247063	0.167241
FBgn0022943	0.23369	0.149227
FBgn0005585	1.11297	0.897866
FBgn0040212	0.222116	0.249947
FBgn0053189	0	0.00278483
FBgn0040551	0.0024211	0.0059077
FBgn0261885	1.7232	1.76948
FBgn0039494	0.0951679	0.0255182
FBgn0037955	0.126393	0.0888913
FBgn0011701	0.00356181	0.00519534
FBgn0086253	0.0238739	0.0213405
FBgn0038498	1.45613	1.51734
FBti0020312	0.00244262	0.00309694
FBti0019299	0.00502322	0.0330536
FBgn0038592	0.0426418	0.0431934
FBgn0063127	0.00382528	0.00769102
FBgn0038257	0.000974915	0.00534897
FBgn0263453	0.00359548	0.00820155
FBgn0264841	0.00102168	0.00705282
FBgn0015240	0.1355	0.122526
FBgn0261261	0.814433	0.900047
FBgn0039109	0.169522	0.176096
FBgn0027563	0.0231367	0.00785717
FBgn0004387	0.856916	0.875026
FBgn0265068	0.0172193	0.00860021
FBgn0038195	0.71535	0.639267
FBgn0262477	2.06203	1.90872
FBgn0039543	0.0522543	0.0550447
FBgn0020018	0.0367125	0.0329571
FBgn0267435	0.00941452	0.00746791
FBgn0014366	0.106848	0.0673564
FBgn0037305	0.20197	0.128943
FBgn0037670	0.123995	0.1486
FBgn0037923	0.0903183	0.0701001
FBgn0264912	0.00349371	0.00152349
FBgn0037708	0.0726552	0.0531844
FBgn0038589	0.00197481	0.00279005
FBgn0040078	0.0966217	0.0848848
FBgn0038165	1.34787	1.23552
FBgn0037668	0.00222734	0.00331907
FBgn0266717	0.894466	0.934452
FBgn0039026	1.18639	1.20011
FBgn0039332	0.0123256	0.00921378
FBgn0039635	0.678144	0.596569
RR48332-transposable-element	0.00102771	0.000525534
FBgn0038029	0.00244526	0.00021099
FBgn0038755	0.546366	0.593716
FBgn0260440	0.0280039	0.017761
FBgn0038744	0.000723704	0.00809419
FBgn0026315	0.00249587	0.000773484
FBgn0003651	0.426295	0.394177
FBti0019396	0.0889602	0.402282
FBgn0085391	2.62755	2.68883
FBgn0038170	0.0187661	0.0291756
FBgn0005649	0.898201	0.960252
FBti0062875	0.0141246	0.010569
FBgn0039536	1.25414	1.19812
FBgn0262559	0.882883	0.731864
FBgn0037326	0.876416	0.85543
FBti0020313	0.0261762	0.0262848
FBgn0037377	0.14597	0.124116
FBti0063296	0.00226838	0.00357134
FBgn0037743	0.196259	0.196058
FBgn0267702	0.00174558	0.00380444
FBgn0039431	1.14801	1.21725
FBgn0038475	0.106364	0.107366
FBgn0263117	0.0121	0.0159456
FBgn0039240	0.854694	0.850441
FBti0020323	0.0193672	0.0115358
FBgn0037815	0.0429362	0.0208191
FBgn0265422	0.000597496	0.00701169
FBti0019405	0.0202149	0.0117611
FBgn0039804	0.000279252	0.00222144
FBgn0086134	0.371078	0.272071
FBgn0027570	0.0404933	0.0713019
FBgn0037933	0.211885	0.19746
FBgn0037299	0.193897	0.15796
FBgn0037912	0.0240887	0.0304245
FBgn0037279	0.199938	0.217884
FBgn0038145	0.946081	0.940625
FBgn0053293	0.00963651	0.00345222
FBgn0038740	0.38001	0.466684
FBgn0001297	0.623805	0.92773
FBgn0028968	0.302551	0.272169
FBgn0013767	0.119766	0.298585
FBgn0040582	0.0289098	0.0170436
FBgn0038390	0.00634564	0.00815061
FBgn0264827	0.0014525	0.00153158
FBgn0003512	0.214062	0.146845
FBgn0024909	0.207873	0.211914
FBgn0262983	0.000564522	0.00165048
FBgn0038450	0.00474225	0.00224918
FBgn0038866	0.0215234	0.0266926
FBti0019297	0.0210201	0.0147937
FBti0019431	0.0124028	0.0118555
FBgn0038894	0.00281257	0.00265647
FBgn0039876	0.130606	0.105569
FBgn0022344	0.347009	0.285623
FBgn0038989	0.117364	0.0766594
FBgn0026441	0.484735	0.530066
FBgn0038980	0.821964	0.797592
FBgn0016119	1.44706	1.18759
FBgn0267753	0.00522094	0.00641884
FBgn0010770	0.0911516	0.0900329
FBgn0038196	0.382433	0.398286
FBgn0016650	0.146322	0.149989
FBti0061737	0.0153588	0.0161001
FBgn0037354	0.0960307	0.0741114
FBgn0038461	0.146625	0.131934
FBgn0000246	0.127441	0.101053
FBgn0038139	0.100455	0.0993795
FBgn0039830	2.29473	2.10419
FBgn0037848	0.381089	0.398106
FBgn0038870	0.0800867	0.0791524
FBgn0086768	0.360591	0.291019
FBgn0039403	0.00613446	0.0105131
FBgn0285925	2.31402	2.44814
FBgn0063649	0.462434	0.473955
FBgn0038286	1.09704	1.186
FBgn0027494	0.0038303	0.00103171
FBgn0039272	0.0314982	0.0259278
FBgn0040682	0.00208262	0.00149528
FBgn0039232	0.0126004	0.0198334
FBgn0003480	0.0111838	0.00645368
FBgn0039734	0.424653	0.307619
FBgn0051388	0.200485	0.163852
FBgn0264816	0.0658839	0.0567876
FBgn0038303	0.131174	0.114971
FBgn0051441	0.0442431	0.0376439
FBgn0038652	0.0101521	0.00930657
FBgn0039611	0.00883281	0.00689809
FBgn0000447	0.195311	0.112461
FBgn0039300	1.99077	1.64728
FBgn0263022	0.0026417	0.00188173
FBgn0039022	0.00117344	0.00913731
FBgn0039098	0.0060455	0.00538518
FBgn0039626	0.217048	0.187108
FBgn0010768	0.237234	0.264643
FBgn0039848	0.032767	0.00758727
FBti0019296	0.0175856	0.0240954
FBgn0085308	0.0234705	0.0301288
FBgn0037602	0.0825275	0.0437026
FBgn0039690	0.136703	0.148083
FBgn0015402	0.210148	0.177006
FBgn0002773	0.0169336	0.00431036
FBgn0026634	0.102091	0.124555
FBgn0051217	0.0151974	0.00337375
FBgn0039379	0.160643	0.153916
FBgn0038361	0.00581872	0.00685001
FBgn0262127	0.395944	0.415015
FBgn0051019	0.000859685	0
FBgn0001321	0.0154788	0.0106427
FBti0019398	0.0160451	0.0104443
FBgn0025781	0.0457086	0.0394568
FBgn0038275	0.14743	0.102666
FBgn0039254	0.172281	0.186934
FBti0019337	0.0124451	0.0176517
FBgn0039265	0.205714	0.149182
FBgn0038697	0.00273765	0.00112571
FBgn0263738	0.0233074	0.0116414
FBgn0037680	0.227991	0.208831
FBgn0243511	0.199596	0.196982
FBgn0039682	0.0602485	0.0480402
FBgn0020385	0.0198841	0.0100553
FBgn0000036	1.81859	1.82847
FBgn0038313	0.147679	0.0974179
FBgn0267680	0.0042091	0.00931809
FBgn0039104	0.000447591	0.000962012
FBgn0038914	0.00649202	0.000742696
FBgn0260745	0.00310347	0.0141739
FBgn0038828	0.507964	0.424714
FBgn0037773	0.0693933	0.0773447
FBti0019468	0.010007	0.00634349
FBgn0038642	0.00527537	0.00500454
FBgn0083950	1.71054	1.80689
FBti0020328	0.0426831	0.047038
FBgn0000247	0.305961	0.264478
FBti0019429	0.0197155	0.0151332
FBgn0028374	0.113825	0.0261807
FBgn0266408	0.0021074	0.00318574
FBgn0038619	0.121549	0.0655328
FBgn0038976	0.356128	0.256645
FBgn0043884	1.43621	1.48787
FBgn0038957	0.182922	0.15633
FBgn0267801	0.00800459	0.00857945
FBgn0038247	0.00781287	0.00438574
FBgn0037213	0.00149244	0.000607649
FBgn0038827	0.0156748	0.0388676
FBgn0243512	0.92714	0.973495
FBgn0085320	0.000650529	0.00693025
FBgn0020626	0.24126	0.207909
FBgn0054027	0.0184878	0.0252133
FBgn0038108	0.892961	0.744612
RR48372-transposable-element	0.0132278	0.0149316
FBgn0266418	0.740293	0.748584
FBgn0039315	0.00118901	0.00368746
FBgn0267385	1.35701	1.21192
FBgn0037443	1.02327	1.04025
FBgn0038747	0.197326	0.221273
FBgn0039638	0.0143843	0.0107194
FBgn0004901	0.00508932	0.00228387
FBgn0038376	0.203986	0.190687
FBgn0038380	0.00611518	0.0114869
FBgn0039705	0.156835	0.150818
FBgn0038057	0.0537813	0.0341181
FBgn0023097	0.758422	0.744489
FBgn0083986	0.274511	0.181317
FBgn0037376	0.184966	0.141136
FBgn0037249	0.52917	0.498853
FBgn0039531	0.0814906	0.065057
FBgn0039883	1.91055	1.99354
FBti0019407	0.0143102	0.0263947
FBgn0039767	0.245576	0.230535
FBgn0264491	0.0107553	0.0213808
FBgn0266730	0.0224809	0.0150116
FBgn0002354	0.24965	0.217998
FBgn0038143	1.33979	1.34755
FBgn0263755	0.0371827	0.0273204
FBti0020386	0.00625613	0.0207217
FBgn0001139	1.19863	1.12346
FBgn0041710	0.00252601	0.000609551
FBgn0045862	0.211951	0.215654
FBgn0039064	2.25912	2.41679
FBgn0038638	0.0496273	0.0277246
FBgn0085382	1.16697	1.2486
FBgn0039048	0.00917157	0.0145184
FBgn0005632	0.869957	0.947538
FBgn0037439	0.0689813	0.0745081
FBgn0085413	1.28903	1.39952
FBgn0039491	0.013818	0.00797558
FBgn0039413	0.0206026	0.0160305
FBgn0087013	0.423268	0.374568
FBgn0039509	0.180507	0.169129
FBgn0014342	0.031118	0.0518165
FBgn0038607	0.00400358	0.00626749
FBgn0023178	0.00323635	0.142422
FBgn0051161	0.0388981	0.0462586
FBgn0037489	0.210568	0.169409
FBgn0037624	0.402777	0.375732
FBgn0039835	0.164875	0.129748
FBgn0259227	0.0838323	0.104775
FBgn0051361	1.06873	1.09829
FBgn0037722	0.0482821	0.0563003
FBgn0038865	0.00110076	0.00190117
FBgn0039854	0.245958	0.219992
FBgn0266413	0.000212292	0.00238376
FBgn0261575	0.0178943	0.015152
FBgn0039861	0.454555	0.387752
FBgn0038460	0.00153644	0.00264181
FBgn0026562	0.0433001	0.00470945
FBgn0001230	2.53351	2.47159
FBgn0010438	0.171298	0.131835
RR48405-transposable-element	0.101323	0.0639708
FBgn0015279	0.335023	0.399035
FBgn0038149	0.00778525	0.0057206
FBgn0039233	0.0700084	0.0643925
FBgn0000015	0.019	0.028352
FBgn0039622	0.00393546	0.00118264
FBgn0261550	1.44824	1.31513
FBgn0037382	0.132254	0.108673
FBgn0037573	0.217448	0.191443
FBti0019414	0.0395676	0.0133298
FBgn0016691	1.18665	0.835397
FBgn0051191	0.601041	0.657149
FBgn0038343	0.00461692	0.0142636
FBgn0264694	0.301805	0.221239
FBgn0083985	0.0441546	0.0231673
FBgn0039023	0.0141477	0.00258382
FBgn0263979	0.291866	0.242178
FBgn0038037	0.00692582	0.00455229
FBgn0039554	0.188597	0.176265
FBgn0038071	0.0140241	0.014892
FBgn0027539	0.193412	0.189172
FBgn0051221	4.09321	4.0661
FBgn0002921	3.91839	3.97949
FBgn0267764	0.00744338	0.0062675
FBti0019445	0.00324154	0.00107636
FBgn0039711	0.0475194	0.0483758
FBgn0001215	1.25608	1.19959
FBgn0265351	0.0187221	0.0172358
FBgn0038268	0.124617	0.116843
FBgn0037698	2.19618	2.09924
FBgn0039299	0	0.000114314
FBgn0027608	1.42408	1.41329
FBgn0025808	0.0863213	0.0543183
FBgn0038981	0.00138727	0.00129606
FBgn0039338	0.800594	0.759596
FBgn0285955	0.156	0.170327
FBgn0261995	0.261557	0.21482
FBgn0038716	0.001259	0.00170727
FBgn0039538	0.0486529	0.047559
FBgn0039360	0.107381	0.108495
FBgn0026314	0	0.00334104
FBgn0264902	0.0155163	0.00549349
FBgn0038092	0.5275	0.427324
FBgn0011474	0.464935	0.462934
FBgn0261649	0.936206	0.924645
FBgn0037537	0.0263396	0.0149541
FBgn0038975	2.34254	2.29347
FBti0059740	0.00188865	0.00649881
FBgn0039163	0.311074	0.219343
FBgn0003257	0.0367918	0.0600283
FBgn0263390	0.00909233	0.00101461
FBgn0061476	0.00102602	0.00418967
FBgn0267233	0.00985898	0.0116907
FBgn0038330	0.445076	0.393569
FBgn0267443	0.00116336	0.00271861
FBgn0267781	0.00551436	0.00315688
FBgn0260463	0	0.00179663
FBgn0039396	0.256045	0.244481
FBgn0051523	0.212045	0.207452
FBgn0044826	0.640895	0.756723
FBgn0037981	0.178874	0.145042
FBgn0037433	0.00578793	0.00198989
FBgn0039562	0.342313	0.379037
FBgn0040259	0.0142609	0.000456628
FBgn0039836	0.0492867	0.0517671
FBgn0019624	1.38411	1.13622
FBgn0038849	0.00379568	0.00576739
FBgn0037338	0.0626027	0.0531851
FBgn0028688	0.135951	0.117214
FBgn0038144	0.00195815	0.00245815
FBgn0283468	0.666262	0.702012
FBgn0039802	0.520785	0.349569
FBgn0287225	0.175331	0.130193
FBgn0040493	0.10251	0.0873239
FBti0059798	0.107197	0.0804896
FBgn0016685	0.485344	0.450298
FBgn0039136	0.166888	0.350001
FBgn0037446	0.328057	0.362042
FBgn0038721	0.23762	0.217403
FBgn0011672	0.211759	0.198427
FBti0019422	0.0406011	0.132759
FBgn0039697	0.134038	0.0782916
FBgn0027518	0.070315	0.0732325
FBgn0037873	0.921517	0.705568
FBgn0039713	2.03159	1.68185
FBgn0039602	0.379767	0.323475
FBgn0039067	0.0989132	0.0858114
FBgn0039589	0.154623	0.142448
FBgn0037760	0.79777	0.901767
FBgn0039118	0.0040503	0.00204512
FBgn0038063	1.67923	1.58243
FBgn0039349	0.380892	0.27506
FBgn0039483	0.000655931	0.00238944
FBgn0037896	0.00601455	0.00139064
FBgn0267799	0.017997	0.00636662
FBgn0038569	0.180108	0.17006
FBgn0013813	0.00437769	0.00570101
FBgn0038546	0.345816	0.287464
FBgn0037621	0.217841	0.168024
FBgn0002937	0.0042997	0.000794209
FBgn0003169	0.535122	0.536354
FBgn0004897	0.00490021	0.00375042
FBgn0037780	0.264154	0.24916
FBgn0262582	2.02215	2.05794
FBgn0038741	0.0584969	0.0553425
FBgn0051207	0	0.0011924
FBgn0025879	0.00315568	0.0233856
FBgn0040253	0.00062611	0.000523843
FBgn0085384	1.27135	1.37843
FBgn0027562	0.00112592	0.000937942
FBgn0039594	0.00911942	0.00363935
FBgn0037324	0.0120094	0.0104838
FBgn0038234	0.191089	0.156948
FBgn0039197	0.003957	0.00171462
FBgn0019925	0.484569	0.404539
FBgn0037611	0.0737287	0.0651977
FBgn0266599	1.52688	1.45712
FBgn0039065	0.294331	0.216967
FBgn0038765	0.0413438	0.0379048
FBgn0038584	0.0472897	0.0368758
FBgn0039687	0.0220566	0.0171023
FBgn0037885	0.0771739	0.0569462
FBti0019372	0.00866587	0.00334969
FBgn0266268	0.187636	0.139434
FBgn0040623	0.423334	0.274066
FBgn0051176	0.123816	0.0922609
FBgn0051477	0.00528869	0.000569073
FBgn0039204	0.30178	0.218941
FBgn0038179	0.00259118	0.00120335
FBgn0038588	0.130173	0.125872
FBgn0037574	0.0935357	0.0503991
FBgn0038878	0	0.00255281
FBgn0026576	0.262059	0.264639
FBgn0266916	0.106236	0.139861
FBgn0039305	0.177159	0.11775
FBgn0038014	0.00309383	0.00976108
FBgn0250910	1.02905	0.937536
FBgn0265274	0.0126362	0.0267291
FBgn0263413	1.17026	1.1198
FBgn0037618	0.000877312	0.000481495
FBgn0038156	0.701145	0.674262
FBgn0267766	0.000669521	0.00185451
FBgn0026417	0.0436818	0.0249557
FBgn0038028	0.00211519	0
FBgn0001197	0.911754	0.769918
FBgn0013278	0.735544	0.58252
FBgn0039376	0.000741626	0.000806725
FBgn0024558	0.183109	0.110219
FBgn0039875	0.362112	0.290548
FBgn0037556	0.478098	0.479636
FBgn0041707	2.54216	2.48336
FBgn0037225	0.116227	0.125495
FBgn0004510	0.118062	0.0951235
FBgn0051140	2.20293	2.30148
FBgn0266697	0.0197271	0.0141657
FBgn0025571	0.61952	0.565642
FBti0062854	0.000296117	0.00335979
FBgn0039347	0.672715	0.613526
FBgn0086704	0.0184062	0.0212883
FBgn0037391	0.648918	0.510907
FBgn0038829	0.242099	0.214696
FBgn0000454	0.0948254	0.0529475
FBgn0039348	0.243389	0.190136
RR48349-transposable-element	0.0789119	0.0282903
FBgn0037215	0.0163873	0.00988005
FBgn0037538	0.121617	0.0879299
FBti0020385	0.0184358	0.0225632
FBgn0037999	0.00599023	0.00186576
FBgn0027657	0.26705	0.243712
FBgn0038909	0.00293946	0.00319025
FBgn0038127	0.0147709	0.00607698
FBgn0053207	0.737132	0.712036
FBgn0039467	0.00772513	0.00965497
FBgn0267661	0.00181106	0.00459787
FBgn0020912	0.163494	0.200856
FBgn0004606	0.222118	0.252269
FBgn0038771	0.181303	0.104046
FBgn0037992	0.00334777	0.00701733
FBgn0037671	1.16988	0.951142
FBgn0051345	0.157809	0.164535
FBgn0037661	0.00186726	0.00284169
FBgn0038673	0.047812	0.0339462
FBgn0037548	0.0118053	0.00208478
FBgn0037506	0.0234003	0.0277037
FBgn0028837	0.113074	0.123841
FBgn0260794	0.985111	1.06926
FBgn0266464	0.374168	0.239332
FBgn0037622	0.108471	0.0932622
FBti0019458	0.0115333	0.0065864
FBgn0037798	0.255826	0.20612
FBgn0039151	0.00132276	0.000481117
FBgn0086472	1.94132	1.77834
FBgn0082831	0.42131	0.35176
FBgn0040608	0.00631633	0.00395825
FBgn0043457	0.142213	0.128816
FBgn0039740	0.0634034	0.0672592
FBgn0038617	0.261365	0.217103
FBgn0037845	0.00269421	0.00406176
FBgn0270928	2.12991	2.1083
FBgn0038397	0.00199171	0.00340169
FBgn0038365	0.00431968	0.00643837
FBgn0037749	0.0795098	0.0320031
FBgn0285911	0.184799	0.185597
FBgn0037290	0.0024738	0.00327117
FBgn0002626	1.80742	1.71908
FBgn0040227	0.344542	0.256346
FBgn0038447	0	0.00251663
FBgn0038438	0.213197	0.170026
FBgn0039068	0.0370709	0.0292743
FBgn0046225	0.18111	0.18023
FBgn0024289	0.00305816	0.00371915
FBgn0015625	0.0208027	0.0281765
RR46410-transposable-element	0.0137059	0.0111734
FBgn0038601	0.0609709	0.106212
FBgn0038271	1.2797	1.08837
FBgn0015737	0.253354	0.177858
FBgn0027524	0.0672093	0.0506986
FBgn0003507	0.001286	0.00257306
FBgn0042106	0.00374871	0.00226935
FBgn0039471	0.000482527	0
FBti0020298	0.0951952	0.0590195
FBgn0003525	0.126199	0.00128194
FBgn0015229	1.32251	1.51396
FBgn0283499	1.28702	1.35605
FBgn0039490	0.00165549	0.00107901
FBgn0037384	0.119613	0.138038
FBgn0265082	1.72505	1.79565
FBti0019350	0.0100347	0.0167828
FBgn0037239	0.421296	0.373505
FBgn0051313	0.00542498	0.00476194
FBgn0039698	0.186867	0.174385
FBgn0037553	0.0233725	0.00275989
FBgn0038173	0.00200486	0.000701822
FBgn0265419	0.00407714	0.00475257
FBti0019326	0.0189794	0.00535233
FBgn0051125	0.0650171	0.0380102
FBgn0039829	0.202653	0.212656
FBgn0010328	0.615656	0.639861
FBgn0038515	0.609949	0.708291
FBgn0039776	0.295151	0.332237
FBgn0019957	0.589948	0.429649
FBgn0000150	1.07539	0.96449
FBgn0038047	0.00803978	0.0194334
FBgn0002645	0.908271	0.94241
FBgn0004436	1.03583	1.0372
FBgn0069242	0.364702	0.283303
FBgn0083946	0.00449154	0.00413685
FBgn0038381	0.00329559	0.00204021
FBgn0051373	0.00200239	0.00334755
FBgn0044823	0.0968896	0.0849902
FBgn0053108	0.0902664	0.0772572
FBgn0051174	0.0216291	0.0149223
FBgn0267810	0.0063856	0.00779218
FBgn0001280	0.206172	0.145574
FBgn0016917	1.15396	1.19672
FBgn0039339	0.00995871	0.0166895
FBgn0038038	0.00662379	0.000938888
FBgn0267953	0.00168005	0.00394468
FBti0019282	0.000655628	0.000349573
FBgn0039040	0.00783205	0.0012068
FBgn0038250	0.017013	0.00596636
FBgn0038056	0.155687	0.129082
FBti0019425	0.00659041	0.00415135
FBgn0004118	0.777628	0.769787
FBgn0026190	0.000388625	0.00141727
FBgn0003889	0.0119663	0.0255529
FBgn0051550	0.493046	0.464112
FBti0062420	0.133943	0.0968765
FBgn0027865	0.885423	0.820808
RR48326-transposable-element	0.0244038	0.177193
FBgn0286507	0.0114643	0.0131519
FBgn0037672	0.0998324	0.118654
FBgn0038846	0.00398567	0.0015485
FBgn0038371	0.0168926	0.0101579
FBgn0039544	0.297277	0.259584
FBgn0263750	0.00836107	0.00949342
FBgn0039846	0.0321074	0.0251755
FBgn0010247	1.53382	1.47417
FBgn0261380	0.214787	0.118738
FBgn0037762	0	0.000608123
FBgn0040588	0.00195987	0.00379801
FBgn0051436	0.00231403	0.000922781
FBgn0037703	0.106871	0.139973
FBgn0040208	0.277645	0.298273
FBti0059724	0.000829901	0.000783207
FBti0019390	0.00217852	0.00530755
FBgn0039252	0.17119	0.128992
FBti0019384	0.0298177	0.0340943
RR48318-transposable-element	0.137536	0.0734602
FBgn0038654	0.00205017	0.0140134
FBti0019393	0.006208	0.00248003
FBgn0004369	2.3634	2.32789
FBti0019364	0.0083188	0.00971213
FBgn0014869	0.965855	0.871526
FBgn0262167	0.124757	0.142268
FBgn0051460	0.179273	0.0686566
FBgn0002632	0.00975097	0.00641207
FBgn0039145	0.00409063	0.00617939
FBti0019376	0.00138545	0.00274621
FBgn0037978	0.291929	0.238351
FBgn0037359	0.0700081	0.0616082
FBgn0038211	0.0134861	0.00676849
FBgn0039488	0.185697	0.171376
FBgn0039234	0.217096	0.159772
FBgn0039747	0.0794267	0.0758689
FBgn0038202	0.378828	0.408728
FBgn0038597	0.0617533	0.0640534
FBgn0038237	1.87729	1.7383
FBgn0010113	3.00276	2.82264
FBgn0039743	0.408939	0.376
FBgn0038083	0	0.000308429
FBgn0038972	0.00369773	0.00326233
FBgn0027620	0.584157	0.570733
FBgn0039170	0.0397683	0.0311464
FBgn0039759	0.00866808	0.0025452
FBgn0051467	0.0233483	0.0206159
FBgn0002441	0.322958	0.299093
FBgn0014141	0.0288652	0.0356889
FBgn0038251	0.265372	0.251474
FBti0061829	0.00191051	0.0044488
FBgn0025457	0.234125	0.153208
FBgn0037653	0.185398	0.118461
FBgn0038261	0.000592564	0.00179039
FBgn0039593	0.00605322	0.000337801
FBgn0039321	0.00565583	0.00158332
FBgn0266227	0.926507	0.650442
FBgn0051198	0.00479388	0.000303161
FBgn0039645	0.00499898	0.000278775
FBgn0039187	0.594566	0.547713
FBgn0037304	0.0794484	0.0835059
FBgn0037913	0.218427	0.362048
FBgn0261552	3.07369	3.19474
FBgn0038897	0.0050809	0.0013579
FBgn0037836	0.00392558	0.0285099
FBgn0266581	0.187122	0.151706
FBgn0037856	0.209539	0.167001
FBgn0038947	0.786481	0.76903
FBgn0039849	0.0722973	0.0985671
FBgn0016123	0.000425364	0.00567386
FBgn0038318	0.213565	0.24072
FBgn0039559	0.10106	0.127367
FBgn0264426	0.0038454	0.00435459
FBgn0037370	0.0624774	0.0380428
FBgn0037835	0	0.0067221
FBgn0027493	0.565933	0.463426
FBgn0261053	0.000363397	0.0044063
FBgn0037801	0.00572872	0.010173
FBgn0051451	5.07977	5.59155
FBgn0038256	0.0106174	0.0200338
FBgn0038549	0.344225	0.321318
FBgn0004087	0.00103888	0
FBgn0037472	0.505135	0.398857
FBgn0260962	0.240651	0.245952
FBgn0037684	0.00448212	0.00569007
FBgn0038722	0.0738548	0.0549237
FBgn0261356	0.01279	0.00206168
FBgn0051475	0.522629	0.540912
FBgn0039738	0.77024	0.747721
FBgn0039381	0.593514	0.574395
FBgn0037250	0.203768	0.174818
FBgn0051155	0.176481	0.117043
FBgn0027526	0.132038	0.126567
FBgn0039271	0.0618371	0.0456892
FBgn0037607	0.31442	0.172007
FBgn0037550	0.0717544	0.0644143
FBgn0038693	1.63323	1.57919
FBgn0038877	0.123719	0.181647
FBgn0039766	0.146838	0.124081
FBgn0038106	0.094336	0.0706357
FBgn0003275	0.523038	0.483717
FBgn0038045	0.000907208	0.0011259
FBgn0037408	0.329366	0.270199
FBgn0038407	0.000272351	0.00118011
FBgn0039644	0.187783	0.192594
FBgn0037819	0.00121453	0.000985352
FBgn0037235	0.0564971	0.0335673
FBgn0038923	0.18712	0.141633
FBgn0037843	0.325798	0.285638
FBgn0053208	0.714654	0.713865
FBgn0087012	0.63488	0.640067
FBgn0051547	0.00421414	0.0181095
FBgn0040575	0.134452	0.125905
FBgn0039154	0.00347201	0.00303287
FBgn0038805	0.22232	0.153533
FBgn0051301	0.182553	0.171877
FBgn0260722	0.461105	0.564164
FBgn0262538	0	0.000714332
FBgn0038198	0.00316636	0.000344927
FBgn0039296	0.161897	0.138385
FBgn0039344	0.000221692	0.00427517
FBgn0038435	0.11157	0.0667376
FBgn0037683	0.00484157	0.00659817
FBgn0037371	0.0610367	0.0642995
FBgn0037345	0.109609	0.0796729
FBgn0037614	0.24464	0.265152
FBgn0037525	1.91741	1.84346
FBgn0038046	0.223628	0.174654
FBgn0038536	0.0986024	0.071871
FBgn0037330	0.175851	0.145436
FBgn0259685	0.134384	0.156088
FBgn0038946	0.000717379	0.00145675
FBgn0037533	0.81393	0.750032
FBgn0037712	0.0693057	0.0736611
FBti0019423	0.000863121	0.00372947
FBgn0038953	0.0665104	0.0642087
FBgn0051390	0.308973	0.241197
FBgn0038627	0.160128	0.0922185
FBgn0027583	0.152305	0.122273
FBgn0039632	0.147299	0.153122
FBgn0037442	0.937696	0.905483
FBgn0004103	1.05441	0.992584
FBgn0039702	0.109992	0.0541493
FBgn0026059	0.776349	0.819635
FBgn0039683	0.0479635	0.0322114
FBgn0046756	0.0127803	0.0010065
FBgn0039125	0.0372935	0.0252334
FBgn0038467	0.0468048	0.0320653
FBgn0010926	0.144715	0.138265
FBgn0038387	0.175201	0.148352
FBgn0037244	0.3065	0.229885
FBgn0037979	0.227356	0.252033
FBgn0038225	0.00303589	0.00495109
FBgn0015591	0.261712	0.215915
FBgn0037613	0.151883	0.104218
FBgn0051262	0	0
FBgn0040528	0.0335171	0.0173683
FBgn0051183	0.204698	0.182306
FBgn0014029	0.541885	0.450481
FBgn0013949	0.0289525	0.00233408
FBgn0037504	0.196324	0.213258
FBgn0037941	0.894621	0.96404
FBgn0267758	0.00251498	0.000941235
FBgn0267562	0.00583437	0.0115901
FBgn0023179	1.8536	1.82471
FBgn0051104	0.000282919	0.000480076
FBgn0046258	0.00875521	0.00773708
FBgn0038095	0.0368339	0.00405405
FBgn0038723	0.242602	0.175516
FBgn0022359	0.00459918	0.0203186
RR48350-transposable-element	0.0266442	0.0163049
FBgn0051251	0.083465	0.0547407
FBgn0039113	0.0758282	0.0706245
FBgn0038277	0.00191729	0.0027325
FBgn0262473	0.84747	0.925413
FBgn0259222	1.16128	1.06173
FBgn0016120	1.39945	1.10986
FBgn0037853	0.00176604	0.00453062
FBgn0262974	0.00243615	0.0213731
FBgn0038606	0.636526	0.67967
FBgn0039869	0.188331	0.129229
FBgn0026565	0	0.000342349
FBgn0037723	0.190363	0.192787
FBgn0264741	0.00185476	0.0029373
FBgn0266698	0.023272	0.00555649
FBgn0265041	0.0306493	0.0179266
FBgn0038426	0.451361	0.340312
FBgn0037719	0.122904	0.114644
FBgn0038002	0.000572247	0.00017563
FBgn0027508	0.32978	0.292256
FBgn0003205	1.12544	1.01129
FBgn0002772	0.00579728	0
FBgn0027497	0.368773	0.304789
FBgn0039454	0.00511023	0.00933369
FBgn0038471	0.149534	0.110552
FBti0019430	0.0201771	0.0332204
FBgn0051144	0.00344318	0.00732006
FBgn0024833	0.31211	0.264756
FBgn0014879	0.298459	0.235573
FBgn0039420	0.906271	0.918443
FBgn0039210	0.235536	0.266545
FBgn0039055	0.188942	0.215469
FBgn0024330	0.324838	0.343412
FBgn0038590	0.0304134	0.040133
FBgn0278604	0.0283351	0.0664519
FBgn0024944	0.496979	0.526842
FBgn0261015	0.0206495	0.0203015
FBti0019437	0.0105764	0.0113717
FBgn0039189	0.0270367	0.0178487
FBgn0054041	0	0.000938749
FBgn0266735	0	0.00209952
FBgn0002868	0.0530765	0.0371508
FBgn0065098	0.891863	0.459183
FBgn0051352	0.773507	0.84496
FBgn0014135	0.0869821	0.116081
FBti0063293	0.0228119	0.0206474
FBgn0039642	0.10783	0.116413
FBgn0265189	0.0343559	0.0355527
FBgn0266719	0.0163623	0.0133173
FBgn0000166	0.000267837	0.00101869
FBgn0283438	0.537936	0.497113
FBgn0039680	0.00855297	0.00457275
FBgn0051445	0.00276391	0.000703894
FBgn0053329	0	0.000443821
FBgn0037901	0.0291313	0.0183407
FBgn0039664	0.0426429	0.0467932
FBgn0039427	0.291123	0.237411
FBgn0022338	0.122102	0.100071
FBgn0285959	0.0247723	0.0180901
FBgn0039056	0.307989	0.246467
FBgn0051370	0.00464722	0.00697384
FBgn0022800	0.00349587	0.00635286
FBgn0267160	0.714972	0.00861878
FBgn0003479	0.00273221	0.0608052
FBgn0051300	0.000525312	0.00740685
FBgn0028471	0.529495	0.505258
FBgn0051326	0.0196329	0.020194
FBgn0038110	0.0750109	0.0565338
FBti0019369	0.00107177	0.0289918
FBgn0037975	0.0017166	0
FBgn0264495	1.62127	1.58214
FBgn0037726	0.00312259	0.0018369
FBgn0013576	2.46874	2.44289
FBgn0038401	0.192492	0.180861
FBgn0019972	0.0514559	0.0471372
FBgn0264005	0.254026	0.201242
FBgn0044511	0.322876	0.258332
FBgn0038087	0.883501	0.839842
FBgn0261393	0	0.00196176
FBgn0037606	0.275492	0.251387
FBgn0037632	0.178194	0.129767
FBgn0038054	0.0198299	0.0276998
FBgn0010803	0.131782	0.122697
FBgn0037730	0.00674063	0.00221281
FBgn0038565	0.00282722	0.00798061
FBgn0039633	1.45917	1.60694
FBgn0039110	0.135033	0.119549
FBti0061925	0.0126475	0.0182051
RR48325-transposable-element	0.0499635	0.039896
FBgn0003867	0.00471085	0.0136781
FBgn0052944	0.387364	0.351612
FBgn0039558	0.127976	0.0889137
FBgn0004618	0.0142186	0.0156009
FBgn0038013	0.0900745	0.0589372
FBgn0066101	1.19224	1.22606
FBgn0039169	0.110715	0.130322
FBgn0003862	1.57993	1.61741
FBgn0038840	0.0473123	0.094613
FBgn0259113	0	0
FBgn0039580	0.299401	0.265217
FBgn0002783	0.294366	0.287441
FBgn0250746	0.302884	0.224942
RR42049-transposable-element	0.00831792	0.00679957
FBgn0051231	0.00655387	0.00883271
FBgn0015351	0.0501339	0.0340842
FBgn0263662	0.00132175	0.000228179
FBgn0039203	0.00498338	0.00929388
FBgn0004587	1.94606	1.87241
FBgn0000039	0.719525	0.664338
FBgn0086346	0.411072	0.358664
FBgn0039013	0.0602458	0.0527584
FBgn0037792	0.150762	0.136814
FBgn0039882	0.137301	0.139474
FBgn0262614	1.47302	1.42516
FBgn0000416	0.66104	0.598136
FBgn0039451	0.340296	0.359698
FBgn0042213	0.230298	0.13526
FBgn0010750	0.285801	0.240272
FBgn0011740	0.218791	0.170107
FBgn0037877	0.157296	0.139015
FBgn0038826	2.23528	2.26232
FBgn0051118	0.552452	0.513473
FBgn0039430	0.362954	0.50269
FBgn0039479	0.0109387	0.0113759
FBgn0038682	0	0.00243968
FBgn0039084	0.00400308	0.00583387
FBgn0039675	0.00198359	0.00154898
FBgn0038018	0.00186397	0
FBti0062874	0.0113764	0.0145884
FBgn0038929	0.444145	0.44076
FBgn0038950	0.118641	0.110792
FBgn0038720	0.0452474	0.0480524
FBgn0051008	0.00178794	0.0015041
FBgn0267239	0	0.00026772
FBgn0003882	0.203762	0.175923
FBgn0039647	1.70226	1.65615
FBgn0001149	0.0985138	0.00903469
FBgn0083949	1.7919	1.80218
FBgn0267567	0.0177253	0.0180783
FBgn0067783	0.140002	0.17801
FBgn0038400	0.855349	0.759465
FBgn0266248	0.0230121	0.0083554
RR48386-transposable-element	0.0480602	0.0724068
FBti0019377	0.0133687	0.0118548
FBgn0038167	0.188352	0.158348
FBgn0038290	0.509692	0.00684955
FBgn0038788	0.224405	0.157292
FBgn0037521	1.98647	2.06774
FBgn0264325	0.139385	0.150841
FBgn0019960	0.425153	0.379135
FBgn0259244	1.56685	1.53478
FBgn0004509	1.21684	1.31551
FBgn0037710	0.137069	0.102168
FBgn0038542	0.775944	0.876833
FBgn0046247	0.542882	0.483541
FBgn0037831	0.248168	0.2397
FBgn0037465	0.188408	0.191613
FBgn0259736	0.00831942	0.0359401
FBgn0037772	0.00243315	0.00108483
FBgn0086608	0.00230062	0.00498614
FBgn0038916	0.00247897	0.00280419
FBgn0038767	0.089014	0.0925964
FBgn0005596	0.103051	0.108497
FBgn0037315	0.276518	0.245517
FBgn0020235	1.07875	0.800786
FBgn0265159	0.000829879	0.00119394
FBgn0039158	0.0723517	0.0549536
FBgn0038830	0.41488	0.310655
FBgn0260944	0.942356	0.582212
FBti0019392	0.00993002	0.00995516
FBgn0051439	0.00944183	0.0151323
FBgn0039620	0.00157459	0.000217411
FBgn0037937	0	0.000240216
FBgn0040554	0.00242138	0.0073667
FBgn0085454	0.0178228	0.0114212
FBgn0039266	0.0230564	0.0328214
FBgn0039639	0.0266532	0.0129966
FBgn0261929	0.353787	0.342003
FBgn0039532	0.251251	0.22586
FBgn0039710	0.156943	0.123666
FBgn0037757	0.203962	0.179424
FBgn0037295	0.390011	0.424646
FBgn0085466	0	0
FBgn0038876	0.190423	0.143116
FBgn0037899	0.983868	0.805624
FBgn0039867	0.0544406	0.054559
FBgn0053213	0.0327997	0.0392846
FBgn0038146	0.0529785	0.0569267
FBgn0039625	0.0514233	0.0533999
FBti0062423	0.103603	0.101635
FBgn0038880	0.117917	0.0988364
FBgn0037754	1.0427	1.03204
FBgn0260005	0.0192252	0.0273067
FBgn0026250	1.55125	1.51653
FBgn0037660	0.191918	0.171036
FBgn0037878	0.342226	0.328063
FBgn0053547	2.74299	2.65304
FBti0019470	0.0240468	0.0210907
FBgn0037356	0.107504	0.0822747
FBgn0038738	0.164414	0.12891
FBgn0038816	0.120738	0.149359
FBgn0004908	0.198571	0.112322
FBgn0263740	0.211366	0.172824
FBgn0038474	0.29424	0.173313
FBti0019463	0.0167748	0.0121093
FBgn0259704	0.123654	0.0854293
FBgn0005659	0.000769087	0.000965847
FBgn0015019	0.445961	0.385671
FBgn0265067	0.0121473	0.0229027
FBgn0263351	0.394521	0.335502
FBgn0051374	0.0192165	0.0180424
FBgn0267757	0.0363091	0.048607
FBgn0000083	0.0212424	0.0299757
FBgn0039214	0.717267	0.666987
FBgn0262869	1.69553	1.77164
FBgn0011481	1.79679	1.836
FBgn0038463	0.0656945	0.0444096
FBgn0010772	1.73172	1.65521
FBgn0038180	0.00192719	0.001324
FBgn0037427	0.00211738	0.0029018
FBgn0004666	0.0284853	0.0305348
FBgn0037341	0.12625	0.11053
FBgn0037841	0.0297262	0.0175735
FBti0019435	0.0127424	0.0112774
FBgn0014380	0.0033657	0.00326343
FBgn0011666	1.97045	2.03516
FBgn0263650	0.00618565	0.00282653
FBgn0266745	0.0130647	0.0106091
FBgn0038735	0.468349	0.419667
FBgn0039356	0.0453456	0.0588932
FBgn0038917	0.0234947	0.027756
FBgn0267698	0.789079	0.773651
FBgn0037583	0.0131915	0.0120296
FBgn0038446	0.34201	0.281621
FBgn0262955	0.218183	0.213805
FBgn0038429	0.0907813	0.0727566
FBgn0040524	0	0.000652581
FBgn0014018	0.074756	0.0433968
FBgn0039629	0.00389014	0.0053187
FBgn0037875	0.109829	0.0871058
FBgn0266673	0.176971	0.174916
RR48319-transposable-element	0.0207847	0.152717
FBgn0026380	0.330929	0.221013
FBgn0037483	0.0468779	0.0534255
FBgn0004898	0.00772316	0.00413574
FBgn0038787	0.539301	0.591732
FBgn0051457	0.105369	0.0890724
FBgn0037619	0.0450041	0.0379814
FBgn0039117	0.0756396	0.0617429
FBgn0086370	0.633485	0.646734
FBgn0037750	0	0.000899911
FBgn0038205	0.0248724	0.0195843
FBti0020307	0.236167	0.207749
FBgn0010877	0.56006	0.570552
FBti0019409	0.000886611	0.000528382
FBgn0263408	0.000204036	0.00197676
FBgn0266668	0.175778	0.143523
FBgn0039407	0.0246101	0.0154849
FBgn0039489	0.0635985	0.0570811
FBgn0037609	0.226471	0.14408
FBgn0037796	0.0208558	0.0209412
FBgn0000504	0.0902089	0.0652823
FBgn0260793	0.977552	1.00996
FBgn0039066	0.452558	0.473207
FBgn0038974	0.0817357	0.100704
FBgn0037637	1.91013	1.71455
FBgn0039688	0.57879	0.624641
FBgn0051549	0.111291	0.12869
FBgn0051278	0.0517554	0.0415306
FBgn0039504	0.00252186	0.0018493
FBgn0000659	1.09113	1.09213
FBgn0038349	0.00255238	0.00183141
FBgn0038129	0.117896	0.11639
FBgn0038766	0.0376475	0.0360127
FBgn0038868	0.152976	0.0977914
FBgn0015778	1.80894	1.85233
FBgn0051103	0.00167309	0.00198192
FBgn0046214	0.510607	0.420758
FBgn0046696	0.0556375	0.0745415
FBgn0039355	0.0322963	0.0247051
FBti0061892	0.00328674	0.000964309
FBgn0051324	1.22182	1.12909
FBgn0037454	0.109144	0.106097
FBgn0039257	0.42053	0.406298
FBgn0267551	0.0289851	0.0183861
FBgn0011715	0.254573	0.241105
FBgn0037716	0.426501	0.349116
FBgn0028708	0.156535	0.146315
FBgn0038890	0.45564	0.450695
FBgn0037648	0.147651	0.12626
FBgn0037569	0.0299504	0.0258161
FBgn0067628	0.0801057	0.044298
FBgn0039402	0.195913	0.182468
FBgn0039156	0.0925942	0.0673564
FBgn0024958	0.174058	0.157846
FBgn0004359	0.0042286	0.00412662
FBgn0243514	0.00516987	0.000440307
FBgn0037707	0.312443	0.250507
FBgn0039566	0.165406	0.186307
FBgn0024222	0.000301007	0.00169974
RR48336-transposable-element	0.0220433	0.0126464
FBgn0003499	2.15708	2.16743
FBgn0037561	0.0609117	0.055546
FBgn0039102	0.0133616	0.00147701
FBgn0038683	0.272432	0.251313
FBgn0038420	0.00645846	0.0118867
FBgn0039111	0.10241	0.0812687
FBti0062083	0.00177388	0.00436734
FBgn0039137	0.0857538	0.0898806
FBgn0011581	0.64513	0.79588
FBgn0260741	0.0511198	0.0717011
FBgn0039120	0.296215	0.283643
FBgn0262577	0.00398162	0.0132122
FBgn0051453	0.0951032	0.0651617
FBgn0260003	1.04919	1.11706
FBgn0086378	0.772426	0.741592
FBgn0038810	0.130821	0.144728
FBti0020321	0.00788944	0.00359042
FBgn0039449	0.0628614	0.0511814
FBgn0038672	0.16985	0.158405
FBgn0037470	0.271878	0.2524
FBti0061704	0.0348263	0.000440596
FBgn0028476	0.465907	0.519921
FBgn0261285	1.25557	1.42874
FBgn0020496	2.00736	1.98384
FBgn0039581	1.148	1.04883
FBgn0039528	0.884237	0.972004
FBgn0011336	0.19071	0.139765
FBgn0037552	0.000529814	0
FBgn0046222	0.141102	0.103194
FBgn0039689	0.0941632	0.0620605
FBgn0037581	0.0527109	0.061814
FBgn0029503	0.0792195	0.0807129
FBgn0016061	2.10572	2.09144
FBgn0027930	0.0773974	0.0242053
FBgn0051363	1.44411	1.29001
FBgn0267730	0.00171189	0.00269879
FBgn0262975	0.743848	0.773349
FBgn0267711	0.00302365	0.00158756
FBgn0039165	0.0575341	0.0454708
FBti0019440	0.00718283	0.0109169
FBgn0262540	0	0.00112749
FBgn0038551	0.148874	0.178168
FBgn0024841	0.844875	0.568744
FBti0059762	0.011126	0.00954273
FBgn0267748	0.00410005	0.00974779
FBgn0053512	0.875823	0.859402
FBgn0260940	0.104873	0.0906409
FBgn0262105	0.00336552	0.0018939
FBgn0037880	0.0700666	0.0388595
FBgn0000064	1.92641	1.89084
FBgn0267790	0.820912	0.721186
FBgn0037874	1.11427	0.917973
FBgn0039623	0.211406	0.20924
FBgn0267780	0.00269999	0.0022862
FBgn0042094	0.124124	0.0971382
FBgn0051098	0.217083	0.181304
FBgn0038488	0.399375	0.477697
FBti0019343	0.00210037	0.00180501
FBgn0037372	0.147503	0.125746
FBgn0011476	0.288135	0.250577
FBgn0038928	0.0410928	0.0379422
FBgn0020910	1.89334	1.72836
FBgn0037612	0.00684211	0.0105668
FBgn0027578	0.00827035	0.00668246
FBgn0267203	0.00187592	0.00123122
FBgn0038746	0.217763	0.29985
FBgn0038260	0.000626454	0.00194583
FBgn0263620	0.0307508	0.0355898
FBgn0011596	0.00967572	0.0116334
FBgn0039126	0.175536	0.17802
FBgn0263768	0.116603	0.114041
FBgn0266409	1.3224	1.39363
FBgn0001138	0.289623	0.325511
FBgn0085315	0.00167928	0.00058177
FBgn0037633	0.0722469	0.0651243
FBgn0028396	0.0575185	0.00362257
FBgn0051431	0.00237886	0.00100188
FBti0020297	0.0609655	0.0491401
FBgn0263929	1.09738	1.17177
FBgn0038269	0.138071	0.128721
FBgn0040238	0.257879	0.311454
FBgn0039306	0.126341	0.0929345
FBgn0053094	0.422515	0.384026
FBgn0037344	0.958758	0.988719
FBgn0265379	0.24442	0.297303
FBgn0037261	1.01379	0.899555
FBgn0039312	0.00550378	0.00701877
FBgn0037755	0.322829	0.308356
FBgn0037918	0.181588	0.212537
FBgn0039801	0.00396428	0.00778986
FBgn0267431	0.733583	0.672164
FBgn0263499	0.00433231	0.00234812
FBgn0039030	0.0196702	0.0134076
FBgn0266721	0.265933	0.261321
FBgn0037248	0.164428	0.168741
FBgn0038449	0.000217155	0.00037071
FBgn0267787	0.00308227	0.00620921
FBgn0014863	0.193671	0.160271
FBgn0039774	0.00418938	0.0258777
FBgn0029512	0.214411	0.15476
FBgn0264357	0.993283	0.939377
FBgn0002622	1.8135	1.55915
FBti0020302	0.00120147	0
FBgn0051233	0.00198172	0.00139688
FBgn0039782	0.00146628	0
FBgn0039464	0.579465	0.556907
FBgn0037944	0.272183	0.287657
FBgn0039213	0.426093	0.435858
FBgn0038099	0.00213716	0
FBti0062387	0.000873282	0.00190786
FBgn0037513	0.0097176	0.00610381
FBti0019347	0.0188204	0.0201651
FBgn0038922	0.963904	0.8488
FBgn0051100	0.000932784	0.000359914
FBgn0264916	0.00331541	0.0036426
FBgn0051360	0.372935	0.252633
FBgn0037759	0.00402543	0.00142233
FBgn0039225	0.0745964	0.0578766
FBgn0037325	0.00121626	0.00701885
FBgn0037578	0.0994272	0.098255
FBgn0263663	0.00476548	0.0131808
FBgn0039112	0.707036	0.588384
FBgn0037976	0.771721	0.742499
FBgn0037935	0.00046562	0.00241415
FBgn0024963	2.66669	2.53362
FBgn0038704	0.501957	0.472278
RR42085-transposable-element	0.00164876	0.00328391
FBgn0020510	0.259602	0.218292
FBgn0039723	0.0957916	0.173836
FBgn0025802	0.310747	0.293287
FBgn0051244	0.00170987	0.00362295
FBgn0039735	0.21733	0.175781
FBgn0038462	0.173847	0.104644
FBgn0037635	0.0779269	0.122118
FBti0019374	0.0295362	0.00977046
FBgn0038300	0.081772	0.0649983
FBti0019302	0.0207237	0.0127161
FBgn0001296	0.0677378	0.021426
FBgn0039218	0.379092	0.249705
FBgn0039140	0.360343	0.329392
FBgn0011020	0.0485787	0.0507498
FBgn0286035	0.00353846	0.0049747
FBgn0038168	0.171047	0.143499
FBgn0026400	0.159641	0.144667
FBti0019333	0.00147995	0.00174665
FBgn0038424	0.307697	0.294662
FBgn0038842	0.00114607	0.00673686
FBgn0003886	0.00315328	0
RR48374-transposable-element	0.0167509	0.0265189
FBti0019416	0.0157259	0.0189156
FBgn0046763	0.0128864	0.0189661
FBgn0083943	0.00457062	0.00182422
FBgn0037949	0.774374	0.851512
FBgn0038837	0.278133	0.436976
FBti0019401	0.0216893	0.0146965
FBgn0037435	0.0852687	0.0870451
FBgn0027951	0.570566	0.584849
FBgn0261599	2.06644	1.85657
FBgn0025865	0.249038	0.249508
FBgn0038595	0.00540989	0.00358986
FBgn0286516	3.4988	3.4735
FBgn0051472	0.15215	0.119709
FBgn0037763	0.00342474	0.000902882
FBgn0002906	0.205379	0.191119
FBgn0039130	0.0324597	0.0371153
FBgn0266720	0.73837	0.73697
FBgn0267975	1.09343	1.06072
FBgn0038299	0.0167622	0.0084839
FBgn0267157	0.0112965	0.012505
FBgn0039595	0.00439329	0.00560249
FBgn0027090	0.123894	0.0899963
FBgn0038924	0.100808	0.0429402
FBgn0039417	0.0436033	0.0442535
FBgn0037445	0.234745	0.288563
FBgn0037240	0.229567	0.242549
FBgn0039081	0.0131657	0.0141946
FBgn0038858	0.0411142	0.0915063
FBgn0038491	0.158364	0.178514
FBgn0037770	0.0869966	0.122639
FBgn0266414	1.93981	1.8455
FBgn0014022	0.179052	0.147005
FBgn0264907	0.568443	0.589304
FBgn0037236	0.00202696	0.0048506
FBgn0037647	0.130956	0.107976
FBti0019428	0.00601786	0.00523166
FBgn0003011	0.0057287	0.00605513
FBgn0051481	0.0588927	0.0968217
FBgn0003137	0.00442357	0.00540682
FBgn0039132	0.818415	0.800672
FBgn0037608	0.214953	0.167092
FBgn0039419	0.381971	0.334813
FBgn0039808	1.11542	1.11033
FBgn0086679	0.238854	0.223436
FBgn0013279	2.33048	2.02695
FBgn0263289	0.990225	0.826837
FBgn0039149	0.717038	0.652235
FBgn0051109	0.227985	0.197959
FBgn0011774	0.0897406	0.0533584
RR48347-transposable-element	0.0463269	0.0218395
FBgn0259146	0.412259	0.475258
FBgn0025574	0.88073	0.787709
FBgn0038516	0.00437533	0.00140079
FBgn0039712	0.315616	0.23512
FBgn0038769	0.0269162	0.0200898
FBgn0038930	0.00827168	0.00906016
FBgn0037765	0.00233799	0.00489217
FBti0019367	0.0163543	0.00917169
FBgn0028436	0.101234	0.0671872
FBgn0020278	0.00627133	0.0224694
FBgn0039857	1.91686	1.60079
FBgn0261988	1.63102	1.51951
FBgn0037838	0.108437	0.0901375
FBgn0038432	0.280235	0.225744
FBgn0039863	0.38377	0.377555
FBgn0250757	0.000582802	0.00533903
FBgn0038088	0.0077037	0.00693426
FBgn0038235	0.094667	0.0995887
FBgn0003134	1.25131	1.2966
FBgn0029157	0.323185	0.321371
FBgn0039124	0.0143396	0.0083921
FBgn0087005	0.00167795	0.00222213
FBgn0027654	2.49039	2.35775
FBgn0037676	1.20921	1.16087
FBgn0039492	0.813991	0.8045
FBgn0283536	2.04287	1.87646
FBgn0002431	0.524349	0.620426
FBgn0262741	0.15795	0.117014
FBgn0038533	0.164672	0.117192
FBgn0040071	1.3101	1.34071
FBgn0043900	0.425937	0.453902
FBgn0014006	0.164365	0.192162
FBgn0037920	0.118095	0.103485
FBgn0037336	0.919622	0.96073
FBgn0028984	0.0171306	0.0124069
FBgn0051414	0	0.00106
FBgn0039770	0.93146	1.04993
FBgn0010389	0.00763545	0.0131636
FBgn0028833	0.825964	0.745047
FBgn0051538	0.0492814	0.0413032
FBgn0039336	0.0399231	0.0286233
FBgn0263048	0.163387	0.162651
FBgn0051004	0.00652435	0.00206917
FBgn0004622	0.162214	0.210923
FBgn0265426	0.000183545	0
FBgn0028671	1.36345	1.35601
FBgn0038964	0.396517	0.334562
FBgn0015622	0.954891	0.880965
FBgn0038552	0.125979	0.0936742
FBgn0037826	0.00605299	0.00232838
FBgn0051064	0.617602	0.605676
FBgn0039651	0.000375093	0.000639607
FBti0019402	0.0210283	0.0235185
FBgn0037855	0.360594	0.333071
FBgn0264493	1.31993	1.35285
FBgn0039283	0.353291	0.332525
FBgn0051344	0.173149	0.146858
FBgn0024912	0.141806	0.129651
FBgn0038389	0.272052	0.208978
FBgn0262125	0.317908	0.323767
FBgn0263490	0.383393	0.394985
FBgn0263414	0.00375745	0.00840818
FBgn0264826	0.00251795	0.00973653
FBti0059775	0.000787865	0.000357253
FBgn0044810	0.000976081	0.000162847
FBgn0082582	0.748875	0.830366
FBgn0020299	0.00465546	0.0223771
FBgn0037490	0.0606783	0.0399506
FBti0019301	0.00060256	0.00368182
FBgn0039094	0.00557796	0.00108397
FBgn0010774	0.733274	0.693237
FBgn0264324	0.499303	0.588548
FBgn0028670	0.00235851	0.00183582
FBgn0039006	0.00234526	0.00159067
FBgn0037332	0.297767	0.268541
FBgn0039691	0.0746265	0.0614639
FBgn0037232	0.255468	0.256564
FBgn0037667	0.0239509	0.0205953
FBgn0023023	0.88752	0.772227
FBti0061797	0.00264009	0.00551889
FBgn0038862	0.203467	0.200712
FBgn0047114	0.0787593	0.0459583
FBgn0005355	0.0786236	0.0689563
FBgn0039150	0.16346	0.0996847
FBgn0027512	0.435289	0.403693
FBgn0039153	0.0958696	0.0975279
FBgn0038679	0.0519573	0.0921871
FBgn0038581	0.126016	0.0962415
FBgn0027655	0.476079	0.477904
FBgn0013953	0.00143909	0
FBgn0285937	0.909443	0.969833
FBgn0038258	0.000784059	0.0100091
FBgn0004885	0.644014	0.669206
FBgn0053110	0.000802087	0
FBgn0038510	0.0198895	0.0185732
FBgn0037644	0.150154	0.119381
FBgn0039155	0.00067879	0
FBgn0039183	0.0574564	0.0539448
FBgn0017577	0.000615871	0.00127949
FBgn0038811	0.0799574	0.0343235
FBgn0267201	0.0219	0.0114241
FBgn0024509	0.336975	0.27641
FBgn0053098	0.00138397	0.00060099
FBgn0051102	0.00436419	0.00218693
FBgn0010038	0.000298354	0.000449457
FBgn0038660	0.00193341	0.0112925
FBgn0262146	0.01443	0.0137206
FBgn0037535	0.18494	0.141809
RR48337-transposable-element	0.00332339	0.00281881
FBgn0015011	0	0.000287172
FBgn0051368	0.117723	0.108528
FBgn0039329	0.122938	0.103422
FBgn0037617	0.0715431	0.0942888
FBgn0039663	0.0281956	0.060302
FBgn0000024	2.02168	2.00088
FBti0059666	0.309118	0.315204
FBgn0045866	0.38	0.265867
FBgn0038053	0.431289	0.3345
FBgn0266756	0.654129	0.640105
FBgn0037756	0.185158	0.141709
FBgn0051148	0.0003571	0.00229768
FBgn0037265	0.117892	0.0945262
FBgn0039326	0.000591777	0
FBgn0000303	1.69852	1.54215
FBgn0051342	0.326299	0.309452
FBti0019394	0.000539425	0.000686719
FBgn0037251	0.180998	0.11745
FBgn0262825	0.00401264	0.00250315
FBgn0039800	0.0194644	0.0160142
RR48385-transposable-element	0.0116203	0.00648901
FBgn0262801	0.461753	0.343882
FBgn0265376	0.104207	0.084727
FBgn0051365	0.169732	0.127694
FBgn0037788	0.0126185	0.0309514
FBgn0000463	0.108517	0.0856111
FBgn0011217	1.62236	1.66641
FBgn0038609	0.0455858	0.0391069
FBgn0039640	0.0431562	0.0304309
FBgn0039555	0.178276	0.149247
FBgn0038585	0.21437	0.119766
FBgn0083991	0.553292	0.678552
FBgn0051151	1.13245	1.11387
FBgn0039886	0.00565117	0.00157591
FBgn0037536	0.431834	0.455638
FBgn0038651	0.156981	0.172198
FBgn0039212	0.246933	0.218143
FBgn0265101	0.282424	0.242029
FBgn0051216	0.0384696	0.0365603
FBgn0051279	0.000299359	0.000957271
FBgn0044812	0.00345501	0
FBgn0038583	0.140379	0.150493
FBgn0039335	0.0530602	0.025499
FBgn0039757	1.85769	1.5577
FBgn0039241	0.0417068	0.0334917
FBgn0024432	0.514682	0.441691
FBgn0040571	0.252277	0.474947
FBgn0015331	0.16864	0.168264
FBgn0037482	0.207728	0.21374
FBgn0038948	0.13603	0.0844395
FBgn0039159	0.233069	0.155568
FBgn0286042	0.0160442	0.00728359
FBgn0038425	0.0810341	0.0542496
FBgn0039045	0.00214818	0.000187244
FBgn0040532	0.0545336	0.0396277
FBgn0038893	0.139185	0.124028
FBgn0022349	0.698637	0.668814
FBgn0038325	0.137783	0.133195
FBgn0038304	0.192971	0.138679
FBgn0038532	0.277034	0.270148
FBgn0039855	0.00971142	0.0111497
FBgn0037291	0.000411812	0.000920964
FBgn0013981	2.67436	2.42445
FBgn0037687	0.0945866	0.0685361
FBgn0013759	2.41785	2.44295
FBgn0038889	0.10082	0.0828655
FBti0019334	0.000631901	0.000170926
FBgn0024555	0.877276	0.926387
FBti0020301	0.00560816	0.00522084
FBgn0261641	1.42295	1.4053
FBgn0039737	0.684422	0.459431
FBgn0086605	0.241233	0.186107
FBti0019288	0.00663501	0.00541048
RR48333-transposable-element	0.0590543	0.0633381
FBgn0022787	0.533836	0.523281
FBgn0039564	0.0109457	0.00341295
FBgn0027610	0.333202	0.34977
FBgn0038388	0.371153	0.293945
FBgn0266053	0.28868	0.293482
FBgn0038653	1.35039	1.43586
FBgn0037973	0.00107697	0
FBti0019439	0.0156706	0.00856227
FBgn0038084	0.407999	0.392381
FBgn0039756	0.00515951	0.00473442
FBgn0086371	0.189609	0.105751
FBgn0024321	0.966952	1.0024
FBgn0260243	0.131079	0.110008
FBgn0259740	0.212148	0.143352
FBgn0039227	0.165079	0.187626
FBgn0038665	0.0109991	0.00476167
FBgn0038312	0.049697	0.0343061
FBgn0040283	0.500508	0.51603
FBgn0015222	1.87824	1.75295
FBgn0013347	0.546188	0.488026
FBgn0038079	0.00160709	0.000676186
FBgn0037520	0.00822587	0.0112294
FBgn0037263	0.0172774	0.0154295
FBgn0051229	0.34173	0.302245
FBgn0038803	0.369082	0.337433
FBgn0038172	0.0177921	0.00663977
FBgn0085438	0.00645428	0.00478766
FBti0019356	0.00174972	0.0044015
FBgn0261984	0.294048	0.333014
FBgn0083975	1.07062	1.16988
FBgn0037627	0.00161723	0.00215018
FBgn0267742	0.00798437	0.00768551
FBgn0266252	0.00830658	0.00980081
FBgn0008646	0.0199417	0.0315144
FBgn0039282	0.735023	0.81847
FBgn0039017	0.0159516	0.0245791
FBgn0037879	0.00820688	0.00573783
FBgn0259938	0.902233	0.872262
FBgn0004597	0.117947	0.0769706
FBgn0039637	0.246964	0.303436
FBgn0037589	0.0521842	0.0395812
FBgn0038872	0.457806	0.513319
FBgn0039273	0.0688792	0.0577974
FBgn0039116	0.391335	0.334085
FBgn0037503	0.000171999	0.00154947
FBgn0250755	0.115471	0.119994
FBgn0038596	0.39814	0.368518
FBgn0037989	0.373344	0.336999
FBgn0037713	0.0803289	0.0424445
FBgn0038686	0.206896	0.19208
FBgn0037778	0.0395737	0.0361628
FBgn0051469	0.0233393	0.00976635
FBgn0037615	0	0.000991048
FBgn0027338	0.678665	0.75384
FBgn0263143	0.00863765	0.0117517
FBgn0266705	0.047744	0.0197798
FBgn0003884	1.96819	1.73108
FBgn0010433	0.0260065	0.0255399
FBgn0051051	0.37558	0.270832
FBgn0262483	2.09141	2.01157
FBgn0039600	1.13939	0.976528
FBgn0003339	0.058927	0.0739694
FBgn0051111	0.0835569	0.0908414
FBgn0250753	1.21763	1.15005
FBgn0038472	0.121054	0.127954
FBgn0266401	0.00139934	0.00484591
FBgn0001234	5.23368	5.32491
FBgn0265140	0.654243	0.668226
FBgn0038324	0.0452589	0.0348567
FBgn0015282	0.399544	0.35897
FBgn0037652	0.169124	0.141178
FBti0020294	0.0557242	0.0359853
FBgn0003308	0.00348144	0.000658227
FBgn0039294	0.00393697	0.00109903
FBgn0038282	2.01602	2.05831
FBgn0266801	2.04356	1.93756
FBgn0038608	0.000387039	0
FBgn0020407	0.040289	0.0514572
FBgn0039452	0.00587952	0.00248505
FBgn0028992	0.144397	0.146745
FBgn0003093	1.76391	1.82823
FBgn0037280	0	0
FBgn0039099	0.00380123	0.00153284
FBgn0038845	0.000935557	0.00149072
FBgn0038427	0.266377	0.30245
FBgn0038681	0.000950631	0.00495597
FBgn0039831	1.55209	1.52369
FBgn0039175	0.0614473	0.0570079
FBgn0027378	0.241291	0.21011
FBgn0038593	0.0724338	0.0892671
FBgn0037960	0.0243339	0.00860661
FBgn0039115	0.16755	0.120675
FBgn0038327	0.092298	0.0592016
FBgn0261928	1.80803	1.7792
FBgn0003598	0.205369	0.200265
FBgn0037398	0.00170729	0.00238224
FBgn0010355	0.323053	0.36811
FBgn0010173	0.190505	0.139111
FBgn0039736	0.00260894	0.00222624
FBti0019304	0.0225465	0.0215467
FBgn0261808	0.194152	0.162305
FBti0020330	0.00309914	0.000885679
FBgn0040534	0.446152	0.381399
FBgn0037739	0.0932462	0.0869216
FBgn0038353	0.00676568	0.00730775
FBgn0053202	1.15814	1.21666
FBti0019448	0.00318882	0.0132131
FBgn0039135	0.355477	0.498142
FBgn0265420	0.0380372	0.0628587
FBgn0039844	0.73044	0.739027
FBgn0266390	0.0240934	0.0433464
FBgn0037468	0.555606	0.455769
FBgn0038080	0.313034	0.137146
FBgn0051092	0.752146	0.816145
FBgn0010313	1.48649	1.59811
FBgn0038487	0.00131155	0.0139909
FBgn0042104	0	0.000721366
FBgn0011582	1.29165	1.39001
FBgn0040670	0.0117114	0.0137016
FBgn0037895	0.00393078	0.00178141
FBgn0069923	1.18175	1.02186
FBgn0051029	0.0146704	0.0195541
FBgn0040601	0.000574559	0.00076511
FBti0062536	0.00422602	0.00448008
FBgn0039678	0.0024914	0.000658777
FBgn0037638	0.0611053	0.078449
FBti0019373	0.00917236	0.0101605
FBgn0039505	0.400493	0.313258
FBgn0039816	1.00061	0.932935
FBgn0250839	0.0529691	0.018426
FBgn0039788	0.00657761	0.0118704
FBgn0028468	0.0275794	0.0166163
FBgn0039862	0.734246	0.784668
FBgn0003482	0.00135021	0.000286432
FBgn0038548	0.0832793	0.0965296
FBgn0013973	0.874491	0.876744
FBgn0037892	0.248644	0.220191
FBgn0086686	1.56751	1.61967
FBgn0051473	0.0090131	0.0133349
FBti0059723	0.00185724	0.000270887
FBgn0038598	0.0127958	0.0143412
FBgn0261049	0.126289	0.116367
FBgn0039337	0.186496	0.134404
FBgn0021750	0.0897337	0.0598307
FBgn0037686	1.60742	1.40023
FBti0019339	0.0106228	0.00639839
FBgn0038968	0.0837841	0.0685069
FBgn0263316	0.00509653	0.0011153
FBgn0039343	0.000743749	0.000345539
FBgn0038547	0.194523	0.233253
FBgn0010812	0.177036	0.125035
FBgn0259215	0.012498	0.00860414
FBgn0085331	0.0106804	0.00666219
FBgn0037958	0.0317962	0.0328104
FBgn0002733	0.00132557	0
FBgn0263626	0.00945174	0.00909276
FBgn0265164	0.0240129	0.0263302
FBgn0083969	0.353904	0.434773
FBti0059720	0.537953	0.201312
FBgn0039525	0.232672	0.170583
FBgn0285963	0.706753	0.697682
FBgn0266753	0.00259313	0.00950209
FBgn0028717	0.734318	0.777025
FBgn0038307	0.338044	0.288908
FBgn0051126	0.265162	0.184152
FBgn0037543	0.0986145	0.0726081
FBgn0262081	1.09809	1.12878
FBgn0262972	0.993447	1.36444
FBgn0037688	0.0497921	0.0550842
FBgn0027514	0.117279	0.119224
FBgn0051040	0.111794	0.127917
FBgn0037515	0.0133859	0.000230339
FBgn0267815	0.0048894	0.00660648
FBgn0011281	0.0111044	0.0021065
FBgn0037297	0.167993	0.161508
FBgn0266137	0.554312	0.452373
FBgn0051005	0.301044	0.270554
FBgn0037473	0.120071	0.105007
FBgn0039380	1.02457	1.15808
FBgn0043005	0.0287234	0.027429
FBgn0002941	0.223943	0.162912
FBgn0037810	0.23473	0.208733
FBgn0051223	0.082745	0.0534917
FBgn0039043	0.00267562	0.00156815
FBgn0260990	0.352018	0.302679
FBgn0037646	0.213403	0.142523
FBgn0003861	0	0.00126656
FBti0061864	0.00922272	0.007222
FBgn0264839	0.00533698	0.00091262
FBgn0260742	0.616662	0.613602
FBgn0051248	0.00539733	0.0103273
FBgn0260462	0.624409	0.600423
FBgn0037312	0.219973	0.16399
FBti0062082	0.057458	0.0376114
FBgn0037342	0.302411	0.226404
FBgn0261004	0.0271172	0.0430051
FBgn0027376	0.00750826	0.00994447
FBgn0004049	0.896133	0.822029
FBgn0039733	0.229536	0.212014
FBgn0039209	1.25368	1.33226
FBti0019469	0.0645521	0.00811172
FBgn0267778	0.00486396	0.001132
FBgn0038857	0.12413	0.109677
FBgn0037696	0	0.00401977
FBgn0265380	0.00220048	0.00329084
FBgn0037655	0.547342	0.540986
FBgn0264785	0.366627	0.380105
FBgn0038925	0.536159	0.42681
FBgn0267763	0.00182338	0.00237574
FBgn0015570	0.00663944	0.000525966
FBgn0038541	0.0171508	0.0160869
FBgn0038934	0.18626	0.186378
FBgn0000477	0.0102517	0.0111289
FBgn0038236	0.00303543	0.000959673
FBgn0004595	5.44615	5.53232
FBgn0261046	1.43305	1.44548
FBgn0062442	0.684415	0.530084
FBgn0038795	0.0142317	0.00704871
FBgn0038984	0.758259	0.694774
FBti0019399	0.0148568	0.00521804
FBgn0039188	0.184428	0.169866
FBgn0037900	0.128751	0.0971701
FBgn0000455	0.296744	0.201664
FBgn0038603	0.300235	0.268193
FBgn0038233	0.14459	0.183011
FBgn0039075	0.609493	0.602588
FBgn0287605	0.0185107	0.00725539
FBgn0039249	0.0591646	0.0616047
FBgn0265421	0.00166072	0.0024359
FBgn0038272	0.0986145	0.0623494
FBgn0038855	0.0813326	0.0733177
FBgn0041605	3.10507	3.09063
FBgn0260487	0.00616175	0.00651026
FBgn0038194	0.0527592	0.00128209
FBgn0038039	0.256106	0.191397
FBgn0038316	0.356584	0.286392
FBgn0039730	0.368163	0.320495
FBti0019305	0.0162867	0.0252471
FBgn0038243	0.0741338	0.0151249
FBgn0028646	0.313952	0.330104
FBgn0038662	0.327993	0.298033
FBgn0029176	0.434159	0.370152
FBgn0260386	0.0191207	0.0208671
FBgn0010051	0.648248	0.594991
FBti0148146	0.0184932	0.0121091
FBgn0037870	0.0737376	0.000249932
FBgn0037566	0.391011	0.327206
FBgn0037736	0.927444	0.92565
FBti0062444	0.0273505	0.0207165
FBgn0016693	0.38694	0.385298
FBgn0265190	0.113546	0.104313
FBgn0261279	0.415051	0.401027
FBgn0263974	0.00599594	0.00246562
FBgn0004644	0.0040208	0.0020483
FBgn0039003	0.0914201	0.0714915
FBgn0038166	0.138154	0.0951087
FBgn0085405	0.197012	0.177635
FBgn0037238	1.32539	1.21726
FBgn0051041	0.00340338	0.00197745
FBgn0004237	0.793931	0.716718
FBgn0085376	0.616986	0.542625
FBgn0259823	0.863893	0.851162
FBgn0051036	0.00723771	0.0116466
FBgn0037643	0.98411	0.871015
FBgn0265048	0.00681501	0.00175178
FBgn0037262	0.441996	0.365852
FBgn0004882	0.574273	0.598151
FBgn0264075	0.209196	0.208871
FBgn0038705	0.0174179	0.0208232
FBgn0025456	0.0648963	0.0645984
FBgn0039628	0.00376788	0.00499648
FBgn0085412	1.19775	1.19679
FBgn0037293	0.142707	0.142676
FBgn0263782	0.157302	0.160119
FBgn0027109	0.218789	0.342774
FBgn0267570	0.18599	0.219456
FBgn0085431	0.0320913	0.0106102
FBgn0052855	0.0102472	0.00740373
FBgn0000071	0	0.00124674
FBgn0046114	0.304333	0.238455
FBgn0038326	0.131247	0.0962682
FBgn0026257	0.0555046	0.0725712
FBgn0037931	0.128045	0.114538
FBgn0023495	0.00180278	0.00329913
FBgn0267229	0.0703842	0.05513
FBgn0287209	0.084628	0.00355544
FBgn0261638	0.00565716	0.00759324
FBgn0037758	0.210746	0.213372
FBti0019438	0.000624253	0.00122394
FBgn0038818	0.0013472	0.00408872
FBgn0037378	0.10963	0.115433
FBgn0039342	0.011857	0.010128
FBgn0039612	0.00947364	0.0173801
FBgn0015790	0.922464	0.912672
FBgn0039631	0.0853091	0.0751533
FBgn0039178	0	0.0079383
FBgn0264986	0.00756668	0.00133767
FBgn0085433	0.635233	0.617442
FBgn0037702	0.536584	0.512299
FBgn0037924	0.123832	0.103633
FBgn0027579	0.0568455	0.059175
FBgn0086362	0.163946	0.136036
FBgn0038295	0.298369	0.329857
FBgn0029170	0.0130577	0.00887351
FBgn0261086	0.458847	0.472835
FBgn0037814	0.178328	0.140194
FBgn0037922	0.116299	0.0946051
FBgn0016672	0.758484	0.634168
FBgn0028475	0.191844	0.187902
FBgn0263231	1.51711	1.54149
FBgn0001180	0.34317	0.380801
FBgn0051272	0.00200252	0.000514171
FBgn0037440	0.0486483	0.0465946
FBgn0045473	0.00184318	0.004353
FBgn0039616	0.00309832	0.00527308
FBgn0037317	0.171337	0.127147
[truncated: 14,076 more rows]

## Sheet: Tm20
geneID	control_normalizedReadsCounts	tau P251L KI_normalizedReadsCounts
FBgn0250732	0.222515	0.216823
FBgn0037409	0.003641	0.00425956
FBgn0027948	0.778633	0.814062
FBgn0038675	0.342306	0.301189
FBgn0000500	0.0292287	0.0220434
FBgn0037610	0.0732609	0.0648639
FBgn0267571	0.237299	0.209992
FBgn0261859	0.852681	0.940692
FBgn0037363	1.34388	1.27574
FBgn0039552	0.0134109	0.0153926
FBgn0039732	0.139988	0.112932
FBgn0038224	1.49901	1.32417
FBgn0264776	0.0113292	0.000973157
FBgn0038525	0	0
FBgn0261436	0.0908842	0.078099
FBgn0038814	0.0415508	0.0092278
FBgn0286871	0.00322519	0.00480291
FBgn0038279	0	0.00193135
FBgn0037625	0.400706	0.280255
FBti0019436	0.0278801	0.0285756
FBgn0027574	0.161295	0.1446
FBgn0260746	0.0034802	0.00183269
FBgn0037930	0.173493	0.208548
FBgn0027095	0.429286	0.316126
FBgn0051450	0.579157	0.406874
FBgn0037794	0.285104	0.281322
FBgn0039229	1.30739	1.2383
FBti0019348	0.0218584	0
FBgn0038737	0.0687138	0.0321511
FBti0019411	0.0152413	0.00912499
FBti0020393	0.0178838	0.0119548
FBgn0039291	0.0272433	0.0483379
FBgn0037547	0.0257635	0.00627865
FBgn0038966	0.0161388	0.0304275
FBgn0037690	0.502959	0.401643
FBti0019321	0.000625449	0.00344427
FBgn0038055	0.272004	0.196153
FBgn0261792	0.176992	0.138225
FBgn0040606	0.0226172	0.0154058
FBgn0037709	0.00445157	0.00840756
FBti0062552	0.0736483	0.0473261
FBgn0037777	0.219368	0.15372
FBgn0046685	0.00507719	0.00624752
FBgn0039313	0.0130209	0.0144374
FBgn0004395	1.1448	1.36486
FBgn0266674	0.10563	0.0934781
FBgn0039019	0.199427	0.163451
FBgn0039172	0.310847	0.248719
RR46358-transposable-element	0.59374	0.592873
FBgn0011290	0.952846	0.849131
FBgn0267816	0.000751453	0.00263759
FBgn0037747	0.616535	0.525435
FBgn0039073	0.0145411	0.00675452
FBgn0040256	0.00208053	0.000676326
FBgn0039404	0.201406	0.101644
FBgn0005674	0.110633	0.0968961
FBgn0011768	0.106305	0.0634733
FBgn0037917	0.4393	0.483891
FBgn0086365	0.00321466	0.00897925
FBgn0017567	0.822583	0.658028
FBgn0039290	0.141496	0.128307
FBti0019361	0.00290635	0.00211243
FBgn0051287	0	0.00103342
FBgn0038577	0.0867029	0.0576034
FBgn0037720	0.0197351	0.0195969
FBgn0001112	0.00388672	0.0113116
FBgn0038344	0.088895	0.0591971
FBgn0037678	0.0193561	0.0322286
FBgn0267709	0.00416752	0.000324057
RR48352-transposable-element	0.000431418	0.00453347
FBgn0051072	0.55397	0.558458
FBgn0013277	0.0723475	0.00164315
FBgn0037718	0.138747	0.14638
FBgn0286071	0.00237631	0.00153792
FBgn0265197	0.0269512	0.0332021
FBgn0003002	0.00808164	0.0274462
FBgn0041588	0.153445	0.0993142
FBgn0039557	0.122606	0.144867
FBti0020309	0.00180593	0.00389465
FBgn0051028	0.000758576	0
FBgn0266598	0.0422558	0.0197778
FBgn0038725	0.614466	0.483201
FBgn0263757	0.00996781	0.00200747
FBgn0039277	0.458799	0.420953
FBgn0039302	0.316926	0.373892
FBgn0039461	0.337097	0.204224
FBgn0037894	0.0557879	0.0466146
FBgn0039817	0.00215468	0.00128847
FBgn0051224	0.78552	0.877567
FBgn0054008	0	0.00225208
FBgn0013276	1.80631	2.1174
FBgn0039714	0.307902	0.239667
FBgn0037802	0.0277559	0.0231986
FBgn0039328	0	0.00163217
FBgn0051116	0.0221747	0.0276485
FBgn0266672	0.282702	0.256577
FBgn0037292	0	0.00107655
FBgn0017550	0.762337	0.753002
FBgn0037679	0.23546	0.234039
FBgn0040609	0	0.00136968
FBgn0038113	0.00153375	0.00032542
FBgn0014931	0.000742891	0.00072507
FBgn0267408	0.0199049	0.0018276
FBgn0038115	0.0124228	0.0142431
FBgn0038745	0.372078	0.388026
FBgn0038321	0.198465	0.219095
FBgn0263594	1.25296	1.24737
FBgn0083984	0.133313	0.0903296
FBgn0015568	0.00818229	0.00284174
FBgn0038881	1.99346	2.00828
FBgn0259139	1.45032	1.25394
FBgn0039258	0.0629664	0.0540684
FBgn0039415	0.0234629	0.0300721
FBgn0264427	0.044383	0.0608222
FBgn0004841	0.203343	0.225629
FBgn0275433	0.0151051	0.00824531
FBti0019345	0.00159416	0.00239472
FBgn0002924	0.0187766	0.0160139
FBgn0051211	0.874364	0.832525
FBgn0267612	0.00939244	0.00769083
FBgn0037993	0.492588	0.462103
FBgn0262962	0.0682971	0.0450021
FBgn0038049	0.320894	0.264812
FBgn0005777	0.20459	0.22879
FBgn0261238	0.635043	0.70573
FBgn0037891	0.818539	0.595997
FBgn0039182	0.153606	0.148563
FBgn0085345	0	0.00217989
FBgn0085383	1.61166	1.62714
FBgn0040080	0.248372	0.240197
FBgn0037383	0.0986186	0.0394671
FBgn0037779	0.00860738	0.00156236
FBgn0000533	0.00351867	0.00345451
FBgn0263025	0.022475	0.0251916
FBgn0264291	0.146633	0.0832578
FBti0019286	0.016458	0.0272154
FBgn0010340	0.135718	0.10003
FBgn0039722	0.00246102	0.0287798
FBgn0038490	0.132089	0.0856545
FBgn0265276	1.68245	1.82408
FBgn0014930	0.117273	0.0882237
FBgn0038809	0.46684	0.394579
FBgn0038678	0.778503	0.603558
FBgn0037478	0.17451	0.103707
FBgn0038428	0.361229	0.216814
FBgn0038853	1.72322	1.75138
FBgn0038306	0.0925611	0.0665064
FBgn0046876	0	0.000648009
FBgn0051320	0.132266	0.134377
FBgn0051184	0.1212	0.0800979
FBgn0037276	0.00245877	0.004123
FBgn0039870	0.139853	0.116668
FBgn0003165	2.71441	2.63846
FBgn0039463	0.00298601	0.00601252
FBgn0038760	0.071127	0.0907405
FBgn0002781	1.05324	0.875497
FBgn0039311	0.0210247	0.0439963
FBgn0038034	0.0120084	0.0273723
FBgn0053970	0.00379832	0.00166108
FBgn0038332	0.164607	0.143433
FBgn0024957	0.202498	0.163699
FBgn0023212	0.424207	0.392206
FBti0061713	0.0019034	0.00408692
FBgn0027492	2.08443	2.17577
FBgn0011289	0.382898	0.298661
FBti0019404	0	0
FBgn0015269	0.935694	1.05157
FBgn0010399	0.573214	0.617354
FBgn0266750	0.041938	0.070713
FBgn0039054	1.71024	1.80299
FBgn0286828	0.190345	0.141941
FBgn0028734	0.761613	0.779992
FBgn0039789	0	0
FBgn0037849	0.384217	0.356366
FBgn0011766	0.731214	0.85478
FBgn0267430	0.0282824	0.0198517
FBti0020308	0.00290543	0.00223998
FBgn0051510	0.483698	0.436138
FBti0019447	0.0228839	0.017183
FBgn0038535	1.04048	1.02545
FBgn0260444	0.274563	0.171594
FBgn0038437	0.124619	0.0983107
FBgn0038369	0.303464	0.22892
FBti0019461	0.307208	0.243432
FBgn0262904	0.00442503	0.0132209
FBgn0263047	0.0266614	0.034748
FBgn0011785	0.375924	0.394683
FBgn0037705	1.6504	1.7708
FBgn0038454	0.190494	0.219692
FBgn0260743	0.310982	0.246774
FBgn0039879	0	0
FBgn0267116	0.00829671	0.0151984
FBgn0039820	0.00194563	0
FBgn0067629	0.0268338	0.0318221
FBgn0017590	2.25012	2.21821
FBgn0039726	0.202608	0.129812
FBgn0260634	1.22391	1.22919
FBgn0037231	0.975107	0.888948
FBgn0267685	0	0.00317684
FBgn0037817	0.00241961	0.00320075
FBgn0262858	0.0396708	0.0532313
FBgn0004876	1.42434	1.38801
FBgn0039685	0.00496053	0.0409294
FBgn0004117	0.0341468	0.0140441
FBgn0037811	0.005815	0.00635209
FBgn0038354	0.00905958	0.00659494
FBgn0037834	0.172686	0.125918
FBgn0003248	0	0.0620261
FBgn0000723	0.0375987	0.04329
FBgn0051030	1.62099	1.50323
FBgn0038199	0.016753	0.0187873
FBgn0037313	0.625047	0.56318
FBgn0037890	0.726033	0.577749
FBgn0039350	0.825168	0.734061
FBgn0037546	0.251392	0.3153
FBgn0015781	0.211375	0.151216
FBgn0002522	0.000390552	0.00155454
FBgn0037737	0.640464	0.671463
FBgn0051551	0	0.00108584
FBgn0051514	0	0.00260229
FBti0019380	0.206581	0.084139
FBgn0039215	0.200035	0.195146
FBgn0264901	0.154927	0.128227
FBgn0037943	0.216621	0.188973
FBgn0038478	0.481851	0.442262
FBgn0028684	0.245377	0.225587
FBgn0051195	0.12284	0.126765
FBgn0028487	0.20512	0.178141
FBgn0002719	0.548218	0.538157
FBgn0027841	0.0765752	0.0930516
FBgn0261479	0.185931	0.122558
FBgn0039696	0.077632	0.0963671
FBgn0038331	0.525494	0.410052
FBgn0051202	0.00231235	0.000390466
FBgn0267118	0.00632588	0.0113354
FBgn0039261	0.549713	0.577789
FBgn0266744	0.00442412	0.0132435
FBgn0267337	0.25235	0.250402
FBgn0037746	0.00183034	0.0138522
FBgn0038854	0.0609546	0.0696221
FBgn0267200	0.00203842	0.00273482
FBgn0037656	0.034957	0.029777
FBgn0037700	0.332654	0.233723
FBgn0038839	1.17135	1.38376
FBgn0037466	0.848004	0.801578
FBti0019320	0.00184919	0.00764841
FBgn0039101	0.000900846	0.00225598
FBgn0011655	0.488846	0.474464
FBgn0039274	0.0513912	0.0305482
FBgn0039731	0.0391753	0.0227481
FBti0019466	0.020869	0.0271532
FBgn0039250	0.00301162	0.0125603
FBgn0015513	0.309215	0.308773
FBgn0017581	2.39871	2.56419
FBgn0020249	0.423473	0.358363
FBgn0040600	0.0555883	0.217236
FBgn0024329	0.144469	0.153456
FBgn0004842	0.0167561	0.0152403
FBgn0039465	1.15654	1.22701
FBgn0013343	3.12324	3.06452
FBgn0002940	0.00736797	0.0513042
FBgn0027873	0.0696436	0.102823
FBgn0038197	0.00832996	0.0134879
FBgn0039346	0.630203	0.459872
FBgn0266372	0.00200359	0.00236936
FBgn0038952	0.0121323	0.0317939
FBgn0000139	0.181411	0.141493
FBgn0020238	2.847	2.78967
FBgn0038476	0.37197	0.4271
FBgn0039341	0.0792126	0.0666564
FBgn0037850	0.0111639	0.0179482
FBgn0037908	0.374205	0.336945
FBgn0037270	1.07163	0.804351
FBgn0038540	0.362029	0.241301
FBgn0038965	0.330695	0.301308
FBgn0039609	0.00897367	0.00982337
FBgn0003268	0.0211658	0.0420884
FBgn0260935	0.113044	0.140152
FBgn0026566	0.494027	0.263842
FBgn0266700	0.0226705	0.0274135
FBgn0037540	0.0513188	0.0507545
FBgn0039703	0.000677953	0.00259998
FBgn0039529	0.00122527	0.00332688
FBgn0044871	0.242619	0.192865
FBgn0039674	0.294866	0.292848
FBgn0051522	0.600328	0.658094
FBgn0283535	1.58263	1.54763
FBgn0023083	0.339516	0.336091
FBgn0037902	0.351778	0.243758
FBgn0051133	0.0244916	0.022579
FBgn0004107	0.100853	0.0890591
FBti0063150	0.0132983	0.00903804
FBgn0250823	1.9297	1.93881
FBgn0037950	0.0231571	0.0326258
FBgn0037714	0.00152255	0.00993951
RR48301-transposable-element	0.0035743	0.00609148
FBgn0037844	0.0463509	0.0266873
FBgn0267199	0	0
FBgn0037883	0.141497	0.0963507
FBgn0039877	0.00104678	0.00235447
FBgn0038206	0.169593	0.163408
FBti0059759	0.01591	0.0314675
FBgn0039764	0.161542	0.212519
FBgn0038402	0	0.00291098
FBgn0039286	0.0144673	0.0233424
FBgn0038183	0.129474	0.061322
FBgn0038412	0.00191183	0
FBgn0038806	0.363722	0.246494
FBgn0022943	0.24478	0.159223
FBgn0005585	0.905495	0.589565
FBgn0040212	0.270931	0.259168
FBgn0053189	0.00120431	0.00520424
FBgn0040551	0.00635641	0.00532878
FBgn0261885	1.66739	1.79787
FBgn0039494	0.0570377	0.0211127
FBgn0037955	0.194631	0.121494
FBgn0011701	0.0237879	0.0319412
FBgn0086253	0.017955	0.0164974
FBgn0038498	1.72105	1.72174
FBti0020312	0.00245245	0.00567559
FBti0019299	0.0432398	0.0786666
FBgn0038592	0.00303077	0.000539284
FBgn0063127	0.00163532	0.00369054
FBgn0038257	0.00392271	0.0013617
FBgn0263453	0.00256901	0.00347093
FBgn0264841	0	0.0103481
FBgn0015240	0.179548	0.172349
FBgn0261261	0.823273	0.931114
FBgn0039109	0.234509	0.178495
FBgn0027563	0.0494796	0.0101117
FBgn0004387	0.817371	0.83579
FBgn0265068	0.0213023	0.00978801
FBgn0038195	0.859671	0.684646
FBgn0262477	2.26465	2.01642
FBgn0039543	0.0566103	0.0615967
FBgn0020018	0.010825	0.0305828
FBgn0267435	0	0.0046541
FBgn0014366	0.108984	0.0675178
FBgn0037305	0.132911	0.111857
FBgn0037670	0.212382	0.226941
FBgn0037923	0.0835249	0.0623927
FBgn0264912	0.00528194	0.00372601
FBgn0037708	0.0642473	0.0551906
FBgn0038589	0.0034058	0.00410022
FBgn0040078	0.0981533	0.0750577
FBgn0038165	1.30752	1.25086
FBgn0037668	0.00569241	0.00699016
FBgn0266717	0.824244	0.94046
FBgn0039026	1.19908	1.21739
FBgn0039332	0.0346323	0.147744
FBgn0039635	0.838705	0.622387
RR48332-transposable-element	0.00550567	0.00160942
FBgn0038029	0.000749214	0
FBgn0038755	0.457297	0.516013
FBgn0260440	0.0159117	0.0201286
FBgn0038744	0.00112865	0.00255123
FBgn0026315	0.000923269	0.00113101
FBgn0003651	0.0638382	0.0619469
FBti0019396	0.103839	0.581118
FBgn0085391	2.85913	3.02287
FBgn0038170	0.00382718	0.0124737
FBgn0005649	0.857236	0.966417
FBti0062875	0.00407779	0.00539774
FBgn0039536	1.11471	1.05464
FBgn0262559	1.18581	1.01263
FBgn0037326	0.940964	0.955807
FBti0020313	0.00242006	0.000733656
FBgn0037377	0.172511	0.157349
FBti0063296	0.00221221	0.0010998
FBgn0037743	0.132149	0.115607
FBgn0267702	0.00154031	0.00771451
FBgn0039431	1.01639	1.05435
FBgn0038475	0.11693	0.116228
FBgn0263117	0.14361	0.0824189
FBgn0039240	0.817968	0.814446
FBti0020323	0.0250259	0.0154998
FBgn0037815	0.0460078	0.0243693
FBgn0265422	0	0
FBti0019405	0.0203909	0.0106827
FBgn0039804	0	0.00207033
FBgn0086134	0.434544	0.334316
FBgn0027570	0.0153591	0.025129
FBgn0037933	0.370215	0.258365
FBgn0037299	0.209153	0.18877
FBgn0037912	0.00867643	0.0230443
FBgn0037279	0.261548	0.239526
FBgn0038145	0.893484	0.768027
FBgn0053293	0.00675435	0.00495987
FBgn0038740	0.432157	0.556385
FBgn0001297	0.582792	0.757249
FBgn0028968	0.306517	0.240073
FBgn0013767	0.00527977	0.00288591
FBgn0040582	0.0145717	0.00506609
FBgn0038390	0.00504415	0.0118861
FBgn0264827	0.00776833	0
FBgn0003512	0.248664	0.17962
FBgn0024909	0.213417	0.217005
FBgn0262983	0.00203751	0.00321389
FBgn0038450	0.00700311	0.00127427
FBgn0038866	0.0143391	0.0282346
FBti0019297	0	0.000577351
FBti0019431	0.0144394	0.0147659
FBgn0038894	0	0.00454956
FBgn0039876	0.169526	0.110512
FBgn0022344	0.437604	0.33207
FBgn0038989	0.104586	0.0771885
FBgn0026441	0.638619	0.632765
FBgn0038980	0.357085	0.405718
FBgn0016119	1.69752	1.40041
FBgn0267753	0.0033332	0.00313917
FBgn0010770	0.0974643	0.0802427
FBgn0038196	0.384263	0.387647
FBgn0016650	0.00116058	0.00353019
FBti0061737	0.0152321	0.0146834
FBgn0037354	0.170434	0.139241
FBgn0038461	0.183655	0.129567
FBgn0000246	0.141727	0.111079
FBgn0038139	0.0210006	0.0346609
FBgn0039830	2.43888	2.19651
FBgn0037848	0.249378	0.31983
FBgn0038870	0.107938	0.0804833
FBgn0086768	0.412011	0.338245
FBgn0039403	0.0179939	0.0169785
FBgn0285925	2.43391	2.56232
FBgn0063649	0.173171	0.178672
FBgn0038286	1.01468	1.11305
FBgn0027494	0.00549406	0.00824
FBgn0039272	0.0299895	0.0257246
FBgn0040682	0	0.00218236
FBgn0039232	0.0730542	0.16047
FBgn0003480	0.00674158	0.00794626
FBgn0039734	0.450839	0.354413
FBgn0051388	0.260564	0.193175
FBgn0264816	0.0763437	0.0915288
FBgn0038303	0.11332	0.116591
FBgn0051441	0.0398032	0.0334727
FBgn0038652	0.0026282	0.00886697
FBgn0039611	0.0304758	0.00875618
FBgn0000447	0.284002	0.194732
FBgn0039300	2.29153	1.97238
FBgn0263022	0.00409273	0.00133149
FBgn0039022	0.020775	0.010265
FBgn0039098	0.00501686	0.00689151
FBgn0039626	0.235385	0.215148
FBgn0010768	0.303397	0.327944
FBgn0039848	0	0.0059864
FBti0019296	0.0294872	0.0197008
FBgn0085308	0.0238491	0.0396744
FBgn0037602	0.0997439	0.0726527
FBgn0039690	0.128639	0.117917
FBgn0015402	0.167459	0.169526
FBgn0002773	0.0031525	0.00480201
FBgn0026634	0.118661	0.114807
FBgn0051217	0.0312749	0.0098654
FBgn0039379	0.174865	0.182613
FBgn0038361	0.000527766	0.00251968
FBgn0262127	0.308771	0.355503
FBgn0051019	0	0
FBgn0001321	0.00319144	0.00337633
FBti0019398	0.0112329	0.00778532
FBgn0025781	0.0420955	0.0374554
FBgn0038275	0.262025	0.153006
FBgn0039254	0.2409	0.177231
FBti0019337	0.0134148	0.0110135
FBgn0039265	0.29399	0.214238
FBgn0038697	0.00293601	0.00311558
FBgn0263738	0.0241172	0.0224659
FBgn0037680	0.175228	0.169622
FBgn0243511	0.21984	0.230495
FBgn0039682	0.246121	0.0970505
FBgn0020385	0.0316385	0.00933352
FBgn0000036	2.03231	2.12843
FBgn0038313	0.185787	0.132736
FBgn0267680	0.00648092	0.0142294
FBgn0039104	0.00552976	0
FBgn0038914	0.0136259	0.0055821
FBgn0260745	0.0237216	0.0701647
FBgn0038828	0.574477	0.406259
FBgn0037773	0.0456271	0.0635532
FBti0019468	0.00779188	0.00719949
FBgn0038642	0.00684736	0.00287356
FBgn0083950	1.59419	1.792
FBti0020328	0.0470034	0.0878394
FBgn0000247	0.260872	0.251241
FBti0019429	0.0174992	0.00657682
FBgn0028374	0.0167965	0.0365401
FBgn0266408	0.00209017	0.0018099
FBgn0038619	0.169333	0.104213
FBgn0038976	0.40344	0.336901
FBgn0043884	1.41034	1.53747
FBgn0038957	0.155251	0.111687
FBgn0267801	0.00688004	0.00496083
FBgn0038247	0.00278387	0.00321638
FBgn0037213	0.00382974	0.00260901
FBgn0038827	0.00737469	0.0354757
FBgn0243512	0.573081	0.716883
FBgn0085320	0	0.00118566
FBgn0020626	0.271978	0.232664
FBgn0054027	0.00414179	0.00592384
FBgn0038108	0.675281	0.659465
RR48372-transposable-element	0.00231	0.000230399
FBgn0266418	0.626201	0.627692
FBgn0039315	0.00219337	0.0013914
FBgn0267385	1.32345	1.13096
FBgn0037443	0.909964	0.897559
FBgn0038747	0.233869	0.275452
FBgn0039638	0.019471	0.0179915
FBgn0004901	0.0172511	0.0085223
FBgn0038376	0.201362	0.179878
FBgn0038380	0.00143208	0.00209837
FBgn0039705	0.155685	0.162947
FBgn0038057	0.0654371	0.0485854
FBgn0023097	0.597425	0.593822
FBgn0083986	0.409352	0.278227
FBgn0037376	0.218283	0.174056
FBgn0037249	0.450609	0.491397
FBgn0039531	0.142529	0.119044
FBgn0039883	1.94257	2.13618
FBti0019407	0.0123014	0.0212785
FBgn0039767	0.238034	0.193543
FBgn0264491	0.0147585	0.0219931
FBgn0266730	0.0164276	0.0116715
FBgn0002354	0.277743	0.256593
FBgn0038143	1.35714	1.3368
FBgn0263755	0.0273927	0.0173795
FBti0020386	0.00343396	0.0383926
FBgn0001139	1.26442	1.21367
FBgn0041710	0.00850238	0.00448753
FBgn0045862	0.188586	0.217813
FBgn0039064	2.19712	2.38932
FBgn0038638	0.0211193	0.0203244
FBgn0085382	1.64219	1.78414
FBgn0039048	0.00477998	0.0117025
FBgn0005632	0.832865	0.917535
FBgn0037439	0.0906558	0.0500714
FBgn0085413	1.77424	1.87449
FBgn0039491	0	0.00437185
FBgn0039413	0.0203779	0.00969083
FBgn0087013	0.399075	0.388159
FBgn0039509	0.264158	0.241556
FBgn0014342	0.0462716	0.0578619
FBgn0038607	0	0.0015964
FBgn0023178	0.00184375	0.00204894
FBgn0051161	0.0392754	0.0357421
FBgn0037489	0.210427	0.170148
FBgn0037624	0.480185	0.440966
FBgn0039835	0.243985	0.133316
FBgn0259227	0.0581869	0.0396668
FBgn0051361	1.87264	1.84317
FBgn0037722	0.0493984	0.0649229
FBgn0038865	0.0171312	0.00533785
FBgn0039854	0.220919	0.148192
FBgn0266413	0.000957932	0.00188935
FBgn0261575	0.00639303	0.00397634
FBgn0039861	0.450145	0.433743
FBgn0038460	0.00484453	0.00847976
FBgn0026562	0.131949	0.0254406
FBgn0001230	1.47899	1.58193
FBgn0010438	0.160468	0.104527
RR48405-transposable-element	0.0214889	0.0403934
FBgn0015279	0.346238	0.396913
FBgn0038149	0.00265373	0.00349437
FBgn0039233	0.0822867	0.0568344
FBgn0000015	0.00697908	0.00957445
FBgn0039622	0.00513401	0
FBgn0261550	1.45938	1.34071
FBgn0037382	0.138969	0.131584
FBgn0037573	0.230171	0.203745
FBti0019414	0.0191045	0.0159157
FBgn0016691	1.42464	1.01838
FBgn0051191	0.187078	0.262655
FBgn0038343	0.0170919	0.00532946
FBgn0264694	0.370884	0.235317
FBgn0083985	0.0613364	0.0576051
FBgn0039023	0.00777814	0.00694867
FBgn0263979	0.269411	0.21727
FBgn0038037	0.0319893	0.0253349
FBgn0039554	0.205301	0.176649
FBgn0038071	0	0.00552893
FBgn0027539	0.153613	0.128331
FBgn0051221	4.43069	4.33936
FBgn0002921	3.96136	4.0932
FBgn0267764	0.00616406	0.00460681
FBti0019445	0.00929848	0.0041815
FBgn0039711	0.0251573	0.0189141
FBgn0001215	1.32103	1.2811
FBgn0265351	0.0363857	0.0271842
FBgn0038268	0.112359	0.12044
FBgn0037698	2.21453	2.10437
FBgn0039299	0.00412498	0
FBgn0027608	1.4831	1.56809
FBgn0025808	0.0938632	0.0520467
FBgn0038981	0.00304508	0.00327852
FBgn0039338	0.772564	0.810028
FBgn0285955	0.0142877	0.0153033
FBgn0261995	0.372707	0.277067
FBgn0038716	0	0.00104741
FBgn0039538	0.0459379	0.0581826
FBgn0039360	0.141994	0.0931945
FBgn0026314	0.00702441	0.0010042
FBgn0264902	0.00390797	0.0066262
FBgn0038092	0.443953	0.339573
FBgn0011474	0.574879	0.56536
FBgn0261649	0.608381	0.624005
FBgn0037537	0.00486016	0.00573212
FBgn0038975	2.23449	2.26299
FBti0059740	0.00134088	0.0055025
FBgn0039163	0.283133	0.220894
FBgn0003257	0.014407	0.0443479
FBgn0263390	0.00560164	0.00960031
FBgn0061476	0	0.000946982
FBgn0267233	0.00909567	0.00821439
FBgn0038330	0.501974	0.373755
FBgn0267443	0.00417989	0.00506589
FBgn0267781	0.00748284	0.00927672
FBgn0260463	0.000952748	0.00254049
FBgn0039396	0.194462	0.1684
FBgn0051523	0.214687	0.255598
FBgn0044826	0.591159	0.67877
FBgn0037981	0.158488	0.13135
FBgn0037433	0.00400163	0.00324342
FBgn0039562	0.285935	0.232981
FBgn0040259	0.0148702	0.00145212
FBgn0039836	0.0339148	0.0291334
FBgn0019624	1.73348	1.47692
FBgn0038849	0.00370282	0.00494685
FBgn0037338	0.073028	0.0601574
FBgn0028688	0.166046	0.144206
FBgn0038144	0.00839727	0.00418874
FBgn0283468	0.654663	0.660642
FBgn0039802	0.571724	0.37823
FBgn0287225	0.17585	0.137088
FBgn0040493	0.0434236	0.0482729
FBti0059798	0.153386	0.0943697
FBgn0016685	0.316005	0.257271
FBgn0039136	0.23693	0.40586
FBgn0037446	0.411322	0.412959
FBgn0038721	0.162566	0.132348
FBgn0011672	0.203602	0.143119
FBti0019422	0.0511549	0.205987
FBgn0039697	0.101486	0.0590653
FBgn0027518	0.091541	0.0634209
FBgn0037873	1.11678	0.843728
FBgn0039713	2.1791	1.68357
FBgn0039602	0.389239	0.338936
FBgn0039067	0.084245	0.0766839
FBgn0039589	0.165805	0.123226
FBgn0037760	0.807112	0.953766
FBgn0039118	0.00225568	0.0113799
FBgn0038063	2.10879	2.0124
FBgn0039349	0.408135	0.310106
FBgn0039483	0.00336024	0.00107082
FBgn0037896	0	0.00124864
FBgn0267799	0.0068205	0.00710349
FBgn0038569	0.177001	0.165231
FBgn0013813	0.000937028	0.00484342
FBgn0038546	0.508801	0.385579
FBgn0037621	0.277413	0.219011
FBgn0002937	0.00344682	0.0171764
FBgn0003169	0.658293	0.630757
FBgn0004897	0	0.000522389
FBgn0037780	0.308773	0.208495
FBgn0262582	2.10348	2.20048
FBgn0038741	0.0456059	0.045543
FBgn0051207	0	0.0027714
FBgn0025879	0.0168095	0.0577657
FBgn0040253	0	0.000626227
FBgn0085384	0.396029	0.544642
FBgn0027562	0.0035545	0.000930221
FBgn0039594	0.0164144	0.00538909
FBgn0037324	0.000546609	0.0086399
FBgn0038234	0.238884	0.178428
FBgn0039197	0.00225882	0.00109549
FBgn0019925	0.529118	0.39619
FBgn0037611	0.0658611	0.0419335
FBgn0266599	1.26416	1.08769
FBgn0039065	0.364989	0.282718
FBgn0038765	0.0436306	0.0488599
FBgn0038584	0.0187842	0.0278819
FBgn0039687	0.0149154	0.0196186
FBgn0037885	0.126079	0.0681265
FBti0019372	0.00229465	0.0037638
FBgn0266268	0.191894	0.15536
FBgn0040623	0.517544	0.313572
FBgn0051176	0.041298	0.0475852
FBgn0051477	0.00773416	0.00384568
FBgn0039204	0.333222	0.219138
FBgn0038179	0	0.00110114
FBgn0038588	0.145282	0.138326
FBgn0037574	0.151687	0.102641
FBgn0038878	0	0.00782958
FBgn0026576	0.239209	0.242755
FBgn0266916	0.0698707	0.106763
FBgn0039305	0.258505	0.185944
FBgn0038014	0	0.000834734
FBgn0250910	1.23848	1.17441
FBgn0265274	0.0217427	0.0643973
FBgn0263413	0.959917	0.927898
FBgn0037618	0	0.000949117
FBgn0038156	0.687836	0.728577
FBgn0267766	0.00107688	0.00169658
FBgn0026417	0.0244239	0.020836
FBgn0038028	0	0
FBgn0001197	1.17544	0.948012
FBgn0013278	0.305691	0.272596
FBgn0039376	0	0
FBgn0024558	0.231559	0.138428
FBgn0039875	0.299107	0.222975
FBgn0037556	0.435109	0.469603
FBgn0041707	2.22684	2.07058
FBgn0037225	0.0302294	0.0207029
FBgn0004510	0.122246	0.0925568
FBgn0051140	2.05316	2.22411
FBgn0266697	0.0204057	0.0296793
FBgn0025571	0.531493	0.513116
FBti0062854	0	0.00492668
FBgn0039347	0.506465	0.435273
FBgn0086704	0.0263236	0.0186685
FBgn0037391	0.725539	0.571159
FBgn0038829	0.313891	0.248155
FBgn0000454	0.045539	0.0401828
FBgn0039348	0.189338	0.164505
RR48349-transposable-element	0.044477	0.0232762
FBgn0037215	0.00895369	0.0123565
FBgn0037538	0.128104	0.105326
FBti0020385	0.0131525	0.0224442
FBgn0037999	0.00260932	0.00132112
FBgn0027657	0.165163	0.137616
FBgn0038909	0.00462914	0.00352524
FBgn0038127	0.0182664	0.00897621
FBgn0053207	0.441233	0.448929
FBgn0039467	0.0272707	0.0232372
FBgn0267661	0.00344238	0.0031114
FBgn0020912	0.00071368	0.0110319
FBgn0004606	0.028599	0.044902
FBgn0038771	0.211249	0.107667
FBgn0037992	0.0124105	0.0045195
FBgn0037671	1.30602	0.997826
FBgn0051345	0.167155	0.136866
FBgn0037661	0.00161389	0.00366272
FBgn0038673	0.0751314	0.0365528
FBgn0037548	0.00728507	0.00337199
FBgn0037506	0.0150134	0.011913
FBgn0028837	0.180182	0.168634
FBgn0260794	0.971721	1.17802
FBgn0266464	0.309233	0.219519
FBgn0037622	0.129598	0.0916052
FBti0019458	0.00771551	0.0129125
FBgn0037798	0.341667	0.174829
FBgn0039151	0.0132203	0.000553831
FBgn0086472	2.32965	2.07217
FBgn0082831	0.4219	0.37611
FBgn0040608	0	0.00255462
FBgn0043457	0.205312	0.167786
FBgn0039740	0.112092	0.0901791
FBgn0038617	0.241958	0.196397
FBgn0037845	0.00727091	0.00225871
FBgn0270928	2.66197	2.71064
FBgn0038397	0.000476358	0.00375503
FBgn0038365	0.00313958	0.00501703
FBgn0037749	0.0919901	0.0616828
FBgn0285911	0.175196	0.158779
FBgn0037290	0.00659794	0.00557979
FBgn0002626	1.93236	1.73228
FBgn0040227	0.359327	0.256857
FBgn0038447	0	0.000527134
FBgn0038438	0.228248	0.1894
FBgn0039068	0.037242	0.0406198
FBgn0046225	0.379734	0.306173
FBgn0024289	0.00242071	0.00724681
FBgn0015625	0.0128939	0.0249975
RR46410-transposable-element	0.0118244	0.0116447
FBgn0038601	0.0873907	0.0862898
FBgn0038271	1.40922	1.16522
FBgn0015737	0.24417	0.193837
FBgn0027524	0.0931494	0.0858292
FBgn0003507	0.00408337	0.00467379
FBgn0042106	0.000640466	0.00117346
FBgn0039471	0	0.000800027
FBti0020298	0.104385	0.0760049
FBgn0003525	0.186297	0.0120217
FBgn0015229	1.91614	2.0994
FBgn0283499	1.25942	1.18498
FBgn0039490	0.00123299	0.000670913
FBgn0037384	0.188763	0.141652
FBgn0265082	1.7279	1.88341
FBti0019350	0.0139048	0.0252469
FBgn0037239	0.284618	0.194098
FBgn0051313	0.0201357	0.0101847
FBgn0039698	0.258631	0.175246
FBgn0037553	0.0241785	0.00227764
FBgn0038173	0.0112756	0.00312895
FBgn0265419	0.00362875	0.00927756
FBti0019326	0.0145138	0.0126844
FBgn0051125	0.12783	0.0978766
FBgn0039829	0.182139	0.137963
FBgn0010328	0.573352	0.619407
FBgn0038515	0.776065	0.856511
FBgn0039776	0.284537	0.298281
FBgn0019957	0.755759	0.557185
FBgn0000150	1.05101	0.976916
FBgn0038047	0.00641624	0.00700851
FBgn0002645	0.768734	0.835252
FBgn0004436	1.12096	1.10649
FBgn0069242	0.4262	0.299378
FBgn0083946	0	0.00289531
FBgn0038381	0.00200547	0.00925294
FBgn0051373	0	0.00370571
FBgn0044823	0.106783	0.0871182
FBgn0053108	0.104747	0.0912359
FBgn0051174	0.0169024	0.0260039
FBgn0267810	0.0114149	0.0119966
FBgn0001280	0.238431	0.203078
FBgn0016917	0.804332	0.899836
FBgn0039339	0.013059	0.0266314
FBgn0038038	0.0238714	0.00236163
FBgn0267953	0	0.000822932
FBti0019282	0	0.000738374
FBgn0039040	0.00766079	0.000785657
FBgn0038250	0.0493582	0.01402
FBgn0038056	0.18216	0.136448
FBti0019425	0.0108098	0.00576856
FBgn0004118	0.746253	0.689012
FBgn0026190	0	0.000573402
FBgn0003889	0.0117984	0.0157536
FBgn0051550	0.465387	0.427119
FBti0062420	0.118653	0.106699
FBgn0027865	0.896535	0.830799
RR48326-transposable-element	0.0499204	0.284609
FBgn0286507	0.00496625	0.0128829
FBgn0037672	0.0782502	0.124484
FBgn0038846	0.00161137	0.00116237
FBgn0038371	0.0126408	0.00644725
FBgn0039544	0.279794	0.231401
FBgn0263750	0.00808568	0.00862817
FBgn0039846	0.0258993	0.024246
FBgn0010247	1.49106	1.42229
FBgn0261380	0.243285	0.147977
FBgn0037762	0.00240333	0
FBgn0040588	0.00518027	0.00519978
FBgn0051436	0	0.00175709
FBgn0037703	0.0955512	0.0840553
FBgn0040208	0.228999	0.263147
FBti0059724	0.000857607	0.00064957
FBti0019390	0.0020404	0.00210152
FBgn0039252	0.221208	0.172584
FBti0019384	0.0360402	0.0559342
RR48318-transposable-element	0.116957	0.0715026
FBgn0038654	0.0240173	0.0205232
FBti0019393	0.0105359	0.00138724
FBgn0004369	2.54949	2.48293
FBti0019364	0.0182804	0.00431601
FBgn0014869	1.04683	0.87706
FBgn0262167	0.0517272	0.0726001
FBgn0051460	0.206738	0.0668062
FBgn0002632	0.0110708	0.00149656
FBgn0039145	0.00436657	0.00648209
FBti0019376	0.00270762	0.00550265
FBgn0037978	0.269384	0.231943
FBgn0037359	0.128717	0.0966103
FBgn0038211	0.044512	0.00910401
FBgn0039488	0.304553	0.183471
FBgn0039234	0.181675	0.106385
FBgn0039747	0.00939068	0.0070136
FBgn0038202	0.362937	0.311991
FBgn0038597	0.0923632	0.0558004
FBgn0038237	1.76702	1.61944
FBgn0010113	1.93552	1.83955
FBgn0039743	0.356256	0.333422
FBgn0038083	0.00650076	0.00070065
FBgn0038972	0.00240762	0.00139476
FBgn0027620	0.563575	0.520593
FBgn0039170	0.0438817	0.0291735
FBgn0039759	0.00152394	0
FBgn0051467	0.011517	0.00833814
FBgn0002441	0.349368	0.332934
FBgn0014141	0.0219726	0.0211612
FBgn0038251	0.280967	0.233387
FBti0061829	0.00267062	0.00146745
FBgn0025457	0.241914	0.179043
FBgn0037653	0.27712	0.195941
FBgn0038261	0.00605609	0.00138019
FBgn0039593	0.0095161	0
FBgn0039321	0.0247718	0.00340308
FBgn0266227	1.06163	0.735631
FBgn0051198	0.00132186	0.000645929
FBgn0039645	0	0.00166978
FBgn0039187	0.530972	0.53956
FBgn0037304	0.0599857	0.0682829
FBgn0037913	0.153849	0.279562
FBgn0261552	3.36879	3.54358
FBgn0038897	0.00901303	0.00121722
FBgn0037836	0.00140521	0.00494629
FBgn0266581	0.129233	0.10937
FBgn0037856	0.211032	0.178919
FBgn0038947	0.936711	0.82829
FBgn0039849	0.0316651	0.0419478
FBgn0016123	0.00358476	0.00802629
FBgn0038318	0.162892	0.181178
FBgn0039559	0.134662	0.14578
FBgn0264426	0.000967406	0.00254053
FBgn0037370	0.039471	0.0214278
FBgn0037835	0.00400597	0
FBgn0027493	0.40571	0.342362
FBgn0261053	0.00217307	0.00731565
FBgn0037801	0.00290022	0.00378132
FBgn0051451	4.71514	5.27593
FBgn0038256	0.00632309	0.00943705
FBgn0038549	0.327628	0.276781
FBgn0004087	0.00654276	0.00446738
FBgn0037472	0.538782	0.364837
FBgn0260962	0.174524	0.215233
FBgn0037684	0.0024362	0.00308605
FBgn0038722	0.149196	0.113
FBgn0261356	0.00761523	0.00209356
FBgn0051475	0.32146	0.386551
FBgn0039738	0.613576	0.640923
FBgn0039381	0.604937	0.601848
FBgn0037250	0.238168	0.187509
FBgn0051155	0.233889	0.139715
FBgn0027526	0.187498	0.14428
FBgn0039271	0.104069	0.0546115
FBgn0037607	0.219811	0.0668732
FBgn0037550	0.110136	0.0797856
FBgn0038693	1.35675	1.43145
FBgn0038877	0.0932721	0.258494
FBgn0039766	0.177067	0.137104
FBgn0038106	0.157565	0.102151
FBgn0003275	0.704597	0.634792
FBgn0038045	0.00263049	0.00297348
FBgn0037408	0.145133	0.134643
FBgn0038407	0.000921819	0.00294252
FBgn0039644	0.156772	0.145234
FBgn0037819	0	0.0164283
FBgn0037235	0.0952724	0.073975
FBgn0038923	0.260736	0.230133
FBgn0037843	0.286387	0.266799
FBgn0053208	0.617663	0.698943
FBgn0087012	0.620707	0.630326
FBgn0051547	0.00106515	0.00327216
FBgn0040575	0.213299	0.163609
FBgn0039154	0.0042778	0.00290333
FBgn0038805	0.219019	0.142769
FBgn0051301	0.184513	0.17743
FBgn0260722	0.336344	0.470441
FBgn0262538	0	0.00029369
FBgn0038198	0.00678862	0
FBgn0039296	0.207665	0.170322
FBgn0039344	0.000651848	0.0112186
FBgn0038435	0.00846171	0.0048327
FBgn0037683	0.00408554	0.00513064
FBgn0037371	0.055386	0.0553365
FBgn0037345	0.137687	0.0742442
FBgn0037614	0.3659	0.370844
FBgn0037525	2.00261	2.01946
FBgn0038046	0.290783	0.179158
FBgn0038536	0.123089	0.0849656
FBgn0037330	0.265893	0.191294
FBgn0259685	0.0501386	0.0808599
FBgn0038946	0.000770191	0.00373888
FBgn0037533	0.687966	0.509378
FBgn0037712	0.0357506	0.0477729
FBti0019423	0.00105367	0.00553968
FBgn0038953	0.0722544	0.0540713
FBgn0051390	0.428804	0.312717
FBgn0038627	0.117436	0.0501401
FBgn0027583	0.181868	0.120944
FBgn0039632	0.164507	0.166041
FBgn0037442	0.956395	0.959904
FBgn0004103	1.12656	1.00751
FBgn0039702	0.105972	0.050181
FBgn0026059	0.805585	0.838439
FBgn0039683	0.261248	0.249609
FBgn0046756	0.00211647	0.00141396
FBgn0039125	0.0234348	0.0280438
FBgn0038467	0.0274885	0.0144731
FBgn0010926	0.201173	0.181853
FBgn0038387	0.235633	0.186869
FBgn0037244	0.357897	0.297376
FBgn0037979	0.181397	0.217841
FBgn0038225	0.00105179	0.00105399
FBgn0015591	0.00185737	0.00610804
FBgn0037613	0.0780344	0.0480776
FBgn0051262	0.0108136	0.00150987
FBgn0040528	0.020359	0.0135947
FBgn0051183	0.0398519	0.0439365
FBgn0014029	0.527156	0.36399
FBgn0013949	0.087335	0.0475888
FBgn0037504	0.126013	0.1715
FBgn0037941	0.717637	0.697874
FBgn0267758	0.00122738	0.00326854
FBgn0267562	0.000808755	0.000735136
FBgn0023179	1.75268	1.7071
FBgn0051104	0.00154996	0.00404764
FBgn0046258	0.00138787	0.000371162
FBgn0038095	0.0557855	0.000725593
FBgn0038723	0.226346	0.157399
FBgn0022359	0.0138933	0.00740149
RR48350-transposable-element	0.0327825	0.0153395
FBgn0051251	0.0702948	0.0413338
FBgn0039113	0.100202	0.0902136
FBgn0038277	0.00713861	0.00439005
FBgn0262473	0.731572	0.82613
FBgn0259222	1.05124	0.97486
FBgn0016120	1.52717	1.24675
FBgn0037853	0.00553423	0.00471266
FBgn0262974	0.000824666	0.00414727
FBgn0038606	0.678315	0.75237
FBgn0039869	0.272566	0.169635
FBgn0026565	0.00199822	0
FBgn0037723	0.113812	0.132844
FBgn0264741	0.00309546	0.00284326
FBgn0266698	0.00469425	0.00398648
FBgn0265041	0.0320919	0.0189778
FBgn0038426	0.663508	0.538077
FBgn0037719	0.134484	0.109444
FBgn0038002	0.00302565	0.00240421
FBgn0027508	0.317893	0.277599
FBgn0003205	1.17947	1.03607
FBgn0002772	0.000737291	0.00138097
FBgn0027497	0.341093	0.304633
FBgn0039454	0.000551058	0.00113003
FBgn0038471	0.17146	0.110792
FBti0019430	0.0238054	0.0408027
FBgn0051144	0.00093355	0.00381825
FBgn0024833	0.377455	0.304639
FBgn0014879	0.318788	0.227588
FBgn0039420	0.649225	0.754011
FBgn0039210	0.333164	0.338071
FBgn0039055	0.217688	0.248735
FBgn0024330	0.344972	0.381099
FBgn0038590	0.0647901	0.0503929
FBgn0278604	0.0512733	0.0770961
FBgn0024944	0.449347	0.529752
FBgn0261015	0.00365731	0.0227247
FBti0019437	0.0152322	0.0107284
FBgn0039189	0.0277604	0.0210202
FBgn0054041	0.00223233	0
FBgn0266735	0	0.0053402
FBgn0002868	0.209965	0.236349
FBgn0065098	0.78865	0.294423
FBgn0051352	0.637955	0.761437
FBgn0014135	0.0260634	0.0371174
FBti0063293	0.00841754	0.0161875
FBgn0039642	0.0712497	0.090603
FBgn0265189	0.030236	0.0284151
FBgn0266719	0.00734276	0.0122706
FBgn0000166	0.00149215	0.00231658
FBgn0283438	0.401724	0.359706
FBgn0039680	0.00561972	0.00161706
FBgn0051445	0.0333438	0.00295891
FBgn0053329	0	0
FBgn0037901	0.032928	0.0310651
FBgn0039664	0.0726527	0.0876499
FBgn0039427	0.36717	0.253129
FBgn0022338	0.189166	0.122341
FBgn0285959	0.00858725	0.0131051
FBgn0039056	0.290137	0.255244
FBgn0051370	0	0.000917683
FBgn0022800	0.00563321	0.00135709
FBgn0267160	0.451553	0.00425303
FBgn0003479	0.00398493	0.0508432
FBgn0051300	0.00435447	0.0132136
FBgn0028471	0.562852	0.561762
FBgn0051326	0.0743548	0.0253742
FBgn0038110	0.0952398	0.0875144
FBti0019369	0.001185	0.0308588
FBgn0037975	0.00103085	0
FBgn0264495	1.66783	1.66101
FBgn0037726	0	0.00111643
FBgn0013576	2.29244	2.3965
FBgn0038401	0.203937	0.179464
FBgn0019972	0.0881338	0.0762183
FBgn0264005	0.0351347	0.0228682
FBgn0044511	0.421895	0.306654
FBgn0038087	0.672428	0.719911
FBgn0261393	0.000815498	0.00264364
FBgn0037606	0.244119	0.321507
FBgn0037632	0.119938	0.0756863
FBgn0038054	0.00653447	0.0128465
FBgn0010803	0.136144	0.10893
FBgn0037730	0.00379984	0.00198537
FBgn0038565	0.00738203	0.00697997
FBgn0039633	1.52653	1.7125
FBgn0039110	0.149472	0.0987916
FBti0061925	0.013235	0.0141538
RR48325-transposable-element	0.0411148	0.017975
FBgn0003867	0.0023342	0.0111653
FBgn0052944	0.365804	0.346298
FBgn0039558	0.209831	0.129808
FBgn0004618	0	0.00049595
FBgn0038013	0.147242	0.100689
FBgn0066101	0.855226	0.868439
FBgn0039169	0.135211	0.17655
FBgn0003862	1.64713	1.68487
FBgn0038840	0.0223327	0.0551839
FBgn0259113	0	0
FBgn0039580	0.310241	0.262636
FBgn0002783	0.264081	0.291993
FBgn0250746	0.252502	0.192323
RR42049-transposable-element	0.00938104	0.00530273
FBgn0051231	0.00061112	0.00115782
FBgn0015351	0.0759404	0.0495311
FBgn0263662	0	0.000956139
FBgn0039203	0.0308215	0.0182172
FBgn0004587	1.8877	1.84471
FBgn0000039	0.66825	0.584941
FBgn0086346	0.397745	0.328905
FBgn0039013	0.0842914	0.0649875
FBgn0037792	0.16286	0.127367
FBgn0039882	0.148918	0.136088
FBgn0262614	1.15733	1.17037
FBgn0000416	0.640457	0.581106
FBgn0039451	0.3759	0.412689
FBgn0042213	0.221984	0.162625
FBgn0010750	0.339083	0.24607
FBgn0011740	0.185908	0.161543
FBgn0037877	0.186331	0.202389
FBgn0038826	2.45697	2.41752
FBgn0051118	0.631364	0.560204
FBgn0039430	0.432101	0.441517
FBgn0039479	0.0077963	0.00521472
FBgn0038682	0.00459801	0.00234269
FBgn0039084	0	0.000405088
FBgn0039675	0.011434	0.0103626
FBgn0038018	0	0
FBti0062874	0.0125378	0.0100566
FBgn0038929	0.163947	0.123207
FBgn0038950	0.152179	0.115363
FBgn0038720	0.0629649	0.0894008
FBgn0051008	0.00119613	0
FBgn0267239	0	0.00330255
FBgn0003882	0.167572	0.156672
FBgn0039647	1.99274	1.98031
FBgn0001149	0.0768795	0.0266361
FBgn0083949	2.15526	2.20974
FBgn0267567	0.0282278	0.0252031
FBgn0067783	0.0995479	0.137257
FBgn0038400	1.08514	0.854723
FBgn0266248	0.0171977	0.0102237
RR48386-transposable-element	0.0920906	0.10598
FBti0019377	0.0144024	0.0205837
FBgn0038167	0.213668	0.204221
FBgn0038290	0.296997	0.00480947
FBgn0038788	0.26579	0.154548
FBgn0037521	1.78447	1.97616
FBgn0264325	0.157606	0.140643
FBgn0019960	0.434229	0.400214
FBgn0259244	1.43065	1.4105
FBgn0004509	1.16319	1.24079
FBgn0037710	0.127318	0.0859023
FBgn0038542	0.53165	0.642189
FBgn0046247	0.722843	0.586326
FBgn0037831	0.281167	0.307272
FBgn0037465	0.208806	0.175597
FBgn0259736	0.00663208	0.0621474
FBgn0037772	0	0.00210814
FBgn0086608	0.00103753	0.00376167
FBgn0038916	0.00625066	0.00205669
FBgn0038767	0.117627	0.112485
FBgn0005596	0.108974	0.146119
FBgn0037315	0.196562	0.16238
FBgn0020235	1.27361	0.916474
FBgn0265159	0.00235995	0.00374431
FBgn0039158	0.0982753	0.0709565
FBgn0038830	0.550052	0.279404
FBgn0260944	1.08351	0.704045
FBti0019392	0.00881827	0.00923363
FBgn0051439	0.00132684	0.00538661
FBgn0039620	0.00926173	0.00117267
FBgn0037937	0	0.000852805
FBgn0040554	0.0016313	0.0160295
FBgn0085454	0.0104071	0.0091866
FBgn0039266	0.158327	0.207739
FBgn0039639	0.0472899	0.0230152
FBgn0261929	0.14828	0.196033
FBgn0039532	0.312491	0.271143
FBgn0039710	0.19929	0.154536
FBgn0037757	0.201801	0.161789
FBgn0037295	0.556027	0.589997
FBgn0085466	0.000993613	0.00057968
FBgn0038876	0.282781	0.206243
FBgn0037899	1.06043	0.814315
FBgn0039867	0.0522444	0.0351698
FBgn0053213	0.0613229	0.0487872
FBgn0038146	0.0437806	0.0476415
FBgn0039625	0.0758199	0.0633282
FBti0062423	0.0763861	0.112083
FBgn0038880	0.450326	0.344007
FBgn0037754	1.29003	1.2404
FBgn0260005	0.0203422	0.0490323
FBgn0026250	1.86829	1.76609
FBgn0037660	0.234054	0.214884
FBgn0037878	0.328957	0.295442
FBgn0053547	2.61801	2.62237
FBti0019470	0.0210577	0.0125775
FBgn0037356	0.105966	0.0720006
FBgn0038738	0.146801	0.0878302
FBgn0038816	0.11486	0.150872
FBgn0004908	0.258066	0.157131
FBgn0263740	0.24392	0.182793
FBgn0038474	0.378236	0.186677
FBti0019463	0.0232024	0.0134768
FBgn0259704	0.116625	0.0721353
FBgn0005659	0.00136145	0.000284151
FBgn0015019	0.279386	0.230149
FBgn0265067	0.0206692	0.0349103
FBgn0263351	0.388975	0.288477
FBgn0051374	0.00265487	0.0107148
FBgn0267757	0.0212851	0.0522673
FBgn0000083	0.0337613	0.0832051
FBgn0039214	0.596641	0.669512
FBgn0262869	2.05844	2.17344
FBgn0011481	1.94536	1.96821
FBgn0038463	0.0608157	0.0413604
FBgn0010772	1.76387	1.70043
FBgn0038180	0	0.00117322
FBgn0037427	0.00493408	0.00238015
FBgn0004666	0.0111639	0.0212505
FBgn0037341	0.155584	0.093112
FBgn0037841	0.0181862	0.0171875
FBti0019435	0.0180884	0.013158
FBgn0014380	0.00848477	0.00056694
FBgn0011666	2.50834	2.55054
FBgn0263650	0.009898	0.0312313
FBgn0266745	0.00901871	0.00225201
FBgn0038735	0.5152	0.457328
FBgn0039356	0.0868521	0.0725816
FBgn0038917	0.00578051	0.0173552
FBgn0267698	0.905581	0.967455
FBgn0037583	0.0088147	0.00758894
FBgn0038446	0.444327	0.386267
FBgn0262955	0.217279	0.229177
FBgn0038429	0.110241	0.107956
FBgn0040524	0.000795598	0.000911675
FBgn0014018	0.0713516	0.0531443
FBgn0039629	0.0167727	0.00361466
FBgn0037875	0.0968134	0.0656068
FBgn0266673	0.130659	0.137908
RR48319-transposable-element	0.0358274	0.202542
FBgn0026380	0.40465	0.206822
FBgn0037483	0.0222203	0.0288789
FBgn0004898	0.000857189	0.00176272
FBgn0038787	0.505087	0.56952
FBgn0051457	0.106134	0.067207
FBgn0037619	0.0452774	0.0451835
FBgn0039117	0.0674824	0.0504137
FBgn0086370	0.518696	0.491217
FBgn0037750	0	0.00187118
FBgn0038205	0.0104624	0.0173758
FBti0020307	0.0959251	0.0763105
FBgn0010877	0.592596	0.612218
FBti0019409	0.00100733	0.000680351
FBgn0263408	0.0115509	0.0218335
FBgn0266668	0.188686	0.135134
FBgn0039407	0.0233603	0.00641491
FBgn0039489	0.0835622	0.0730704
FBgn0037609	0.267025	0.174623
FBgn0037796	0.0430923	0.0459153
FBgn0000504	0.00363109	0.0165211
FBgn0260793	1.12754	1.18824
FBgn0039066	0.480685	0.522422
FBgn0038974	0.0913312	0.0600539
FBgn0037637	2.01584	1.68564
FBgn0039688	0.594829	0.675143
FBgn0051549	0.157548	0.170467
FBgn0051278	0.0428259	0.0396728
FBgn0039504	0.00257365	0.00158773
FBgn0000659	0.170155	0.24388
FBgn0038349	0.00552223	0.00155589
FBgn0038129	0.152626	0.14687
FBgn0038766	0.0474635	0.030537
FBgn0038868	0.244149	0.146231
FBgn0015778	1.87633	2.00538
FBgn0051103	0.00539245	0
FBgn0046214	0.53049	0.428517
FBgn0046696	0.132151	0.154393
FBgn0039355	0.0630341	0.0430259
FBti0061892	0.000431841	0.000577351
FBgn0051324	1.85137	1.76591
FBgn0037454	0.0629287	0.0819304
FBgn0039257	0.224298	0.242127
FBgn0267551	0.0389468	0.0286742
FBgn0011715	0.2856	0.217373
FBgn0037716	0.494638	0.405058
FBgn0028708	0.163094	0.124778
FBgn0038890	0.479428	0.52442
FBgn0037648	0.177329	0.132159
FBgn0037569	0.0483303	0.0352376
FBgn0067628	0.0976974	0.0484589
FBgn0039402	0.257233	0.206689
FBgn0039156	0.114776	0.0735741
FBgn0024958	0.220673	0.17912
FBgn0004359	0	0.00295548
FBgn0243514	0.00855672	0.00119269
FBgn0037707	0.330678	0.258417
FBgn0039566	0.112207	0.135104
FBgn0024222	0.0033198	0.00796642
RR48336-transposable-element	0.00846771	0.00343157
FBgn0003499	1.76139	1.71676
FBgn0037561	0.0598756	0.0492458
FBgn0039102	0.0267489	0.000602957
FBgn0038683	0.318109	0.277072
FBgn0038420	0.00554958	0.0238894
FBgn0039111	0.194732	0.100914
FBti0062083	0.000438291	0.00426612
FBgn0039137	0.0865678	0.0645399
FBgn0011581	0.016786	0.0125639
FBgn0260741	0.0941129	0.0713303
FBgn0039120	0.299321	0.2681
FBgn0262577	0.00512414	0.00732404
FBgn0051453	0.0191585	0.0360133
FBgn0260003	1.12636	1.2011
FBgn0086378	0.811598	0.662075
FBgn0038810	0.138253	0.143847
FBti0020321	0.0256537	0.00393092
FBgn0039449	0.122323	0.0859061
FBgn0038672	0.270221	0.201229
FBgn0037470	0.250919	0.229405
FBti0061704	0.0268479	0.00294367
FBgn0028476	0.475627	0.581451
FBgn0261285	1.21066	1.40821
FBgn0020496	2.00831	2.00351
FBgn0039581	0.969327	0.982725
FBgn0039528	0.95593	1.06858
FBgn0011336	0.134219	0.139443
FBgn0037552	0.00154859	0.000552918
FBgn0046222	0.125935	0.109145
FBgn0039689	0.118766	0.0912017
FBgn0037581	0.0372457	0.0790731
FBgn0029503	0.0773441	0.0544399
FBgn0016061	2.14448	2.1468
FBgn0027930	0.113933	0.0348571
FBgn0051363	1.57209	1.39704
FBgn0267730	0.00136809	0.00172139
FBgn0262975	0.494207	0.517515
FBgn0267711	0.00211058	0.00147231
FBgn0039165	0.0329932	0.0440905
FBti0019440	0.0106087	0.0144753
FBgn0262540	0	0.00127829
FBgn0038551	0.267004	0.236892
FBgn0024841	0.46782	0.25264
FBti0059762	0.0118842	0.00579721
FBgn0267748	0	0.0206953
FBgn0053512	0.95016	0.949219
FBgn0260940	0.192106	0.121177
FBgn0262105	0	0.000569185
FBgn0037880	0.0612038	0.0492043
FBgn0000064	2.00358	1.98648
FBgn0267790	0.805021	0.682633
FBgn0037874	1.5107	1.22548
FBgn0039623	0.187304	0.201243
FBgn0267780	0.00313893	0.00144458
FBgn0042094	0.0932388	0.0833931
FBgn0051098	0.218945	0.17805
FBgn0038488	0.396885	0.491277
FBti0019343	0.000763842	0.00116437
FBgn0037372	0.181032	0.104578
FBgn0011476	0.460076	0.372487
FBgn0038928	0.0459546	0.0435961
FBgn0020910	1.70319	1.38555
FBgn0037612	0.0136499	0.0101159
FBgn0027578	0.0348675	0.0169046
FBgn0267203	0	0.00445334
FBgn0038746	0.300466	0.340029
FBgn0038260	0.010112	0
FBgn0263620	0.0177478	0.0279324
FBgn0011596	0.00788317	0.00481796
FBgn0039126	0.311748	0.219394
FBgn0263768	0.134086	0.109312
FBgn0266409	1.55821	1.56663
FBgn0001138	0.00583501	0.0255898
FBgn0085315	0.00122698	0
FBgn0037633	0.0568195	0.0482668
FBgn0028396	0.0532518	0.000556367
FBgn0051431	0	0
FBti0020297	0.045193	0.0559085
FBgn0263929	1.00474	1.13796
FBgn0038269	0.136978	0.125373
FBgn0040238	0.129989	0.149477
FBgn0039306	0.128691	0.134812
FBgn0053094	0.389818	0.35778
FBgn0037344	0.927694	1.02835
FBgn0265379	0.304606	0.339159
FBgn0037261	1.09663	0.930481
FBgn0039312	0.0223318	0.0394667
FBgn0037755	0.473329	0.427516
FBgn0037918	0.176239	0.262125
FBgn0039801	0.0139832	0.010171
FBgn0267431	0.120718	0.101203
FBgn0263499	0.00206954	0.00548573
FBgn0039030	0.0125349	0.00963843
FBgn0266721	0.343004	0.316943
FBgn0037248	0.202684	0.178209
FBgn0038449	0	0
FBgn0267787	0.0064283	0.0120018
FBgn0014863	0.169061	0.178857
FBgn0039774	0.0200954	0.0295125
FBgn0029512	0.249517	0.199133
FBgn0264357	1.02553	1.01863
FBgn0002622	1.97443	1.61414
FBti0020302	0	0.000659046
FBgn0051233	0.00253134	0
FBgn0039782	0	0
FBgn0039464	0.693906	0.617561
FBgn0037944	0.240324	0.256393
FBgn0039213	0.426836	0.443806
FBgn0038099	0	0
FBti0062387	0.00486707	0.00360296
FBgn0037513	0.00776897	0.00577966
FBti0019347	0.0451765	0.022995
FBgn0038922	1.04007	0.857979
FBgn0051100	0.00307685	0.00105124
FBgn0264916	0.0117271	0.00810785
FBgn0051360	0.397664	0.251042
FBgn0037759	0.00881414	0.0154774
FBgn0039225	0	0.00363153
FBgn0037325	0.00365785	0.00806098
FBgn0037578	0.0662	0.0789811
FBgn0263663	0.0092328	0.0286641
FBgn0039112	1.16305	0.907318
FBgn0037976	0.295683	0.114809
FBgn0037935	0.00278956	0.00175216
FBgn0024963	2.8647	2.73859
FBgn0038704	0.515625	0.467688
RR42085-transposable-element	0.00222662	0.00237208
FBgn0020510	0.23499	0.18775
FBgn0039723	0.0908499	0.157718
FBgn0025802	0.273118	0.298182
FBgn0051244	0.00437297	0.00296252
FBgn0039735	0.253553	0.16786
FBgn0038462	0.201873	0.123641
FBgn0037635	0.060047	0.0769347
FBti0019374	0.0331273	0.0105126
FBgn0038300	0.099131	0.0675301
FBti0019302	0.0148627	0.00841949
FBgn0001296	0.0622462	0.0252053
FBgn0039218	0.486547	0.367603
FBgn0039140	0.396115	0.337256
FBgn0011020	0.0332676	0.0459406
FBgn0286035	0.000681364	0.00033641
FBgn0038168	0.15211	0.168641
FBgn0026400	0.237613	0.177606
FBti0019333	0.00129369	0.000503647
FBgn0038424	0.388237	0.300831
FBgn0038842	0.00369702	0.0063446
FBgn0003886	0	0
RR48374-transposable-element	0.00223603	0.0034049
FBti0019416	0.0172279	0.040981
FBgn0046763	0.00544377	0.00395611
FBgn0083943	0.00208979	0.000968737
FBgn0037949	0.740672	0.809407
FBgn0038837	0.266502	0.36304
FBti0019401	0.0193884	0.0100203
FBgn0037435	0.120414	0.100793
FBgn0027951	0.510726	0.558006
FBgn0261599	2.20787	1.92987
FBgn0025865	0.340721	0.296974
FBgn0038595	0.000703978	0.00513825
FBgn0286516	3.94019	3.79057
FBgn0051472	0.192055	0.121645
FBgn0037763	0.00237134	0.00451901
FBgn0002906	0.204399	0.188187
FBgn0039130	0.080081	0.0434169
FBgn0266720	0.596191	0.717412
FBgn0267975	1.26173	1.17475
FBgn0038299	0.101227	0.0136298
FBgn0267157	0.012512	0.0209971
FBgn0039595	0.00483128	0.0016506
FBgn0027090	0.0819467	0.0711955
FBgn0038924	0.105662	0.0819994
FBgn0039417	0.0763884	0.0644069
FBgn0037445	0.263639	0.362271
FBgn0037240	0.231982	0.251416
FBgn0039081	0.0322703	0.0606458
FBgn0038858	0.0367843	0.0425154
FBgn0038491	0.300492	0.276551
FBgn0037770	0.0573216	0.0684275
FBgn0266414	1.95667	1.71954
FBgn0014022	0.244914	0.165705
FBgn0264907	0.406816	0.448141
FBgn0037236	0.00999461	0.00647463
FBgn0037647	0.168915	0.123952
FBti0019428	0.000587074	0.00250716
FBgn0003011	0.644517	0.627925
FBgn0051481	0.0018399	0.00245247
FBgn0003137	0.0300921	0.00607592
FBgn0039132	0.83565	0.789796
FBgn0037608	0.250958	0.183424
FBgn0039419	0.445692	0.415847
FBgn0039808	0.896807	0.880725
FBgn0086679	0.2349	0.209655
FBgn0013279	1.158	0.830458
FBgn0263289	0.840684	0.85919
FBgn0039149	0.875213	0.807674
FBgn0051109	0.234194	0.209576
FBgn0011774	0.0975551	0.0660795
RR48347-transposable-element	0.0455321	0.0230629
FBgn0259146	0.502214	0.53949
FBgn0025574	0.979574	0.848976
FBgn0038516	0.00531519	0.00272148
FBgn0039712	0.433162	0.320161
FBgn0038769	0.0157359	0.0112403
FBgn0038930	0.0129211	0.0114896
FBgn0037765	0.00487457	0.0024241
FBti0019367	0.0164941	0.00574243
FBgn0028436	0.115418	0.083511
FBgn0020278	0.00311323	0.0127247
FBgn0039857	2.08293	1.63329
FBgn0261988	1.53917	1.43634
FBgn0037838	0.111422	0.06651
FBgn0038432	0.258443	0.181394
FBgn0039863	0.374578	0.371878
FBgn0250757	0.00721354	0.0220109
FBgn0038088	0.0153717	0.011695
FBgn0038235	0.159097	0.108869
FBgn0003134	1.30049	1.2844
FBgn0029157	0.306564	0.327201
FBgn0039124	0.0035136	0.00224403
FBgn0087005	0	0.00772215
FBgn0027654	1.9321	1.5901
FBgn0037676	1.62538	1.5573
FBgn0039492	0.72928	0.753053
FBgn0283536	2.09723	1.90897
FBgn0002431	0.549857	0.582439
FBgn0262741	0.016292	0.0299044
FBgn0038533	0.26676	0.165204
FBgn0040071	1.26006	1.3013
FBgn0043900	0.443055	0.491318
FBgn0014006	0.174495	0.170138
FBgn0037920	0.117981	0.0807579
FBgn0037336	0.789224	0.870361
FBgn0028984	0.0452672	0.0502712
FBgn0051414	0.00851828	0.00378562
FBgn0039770	0.566023	0.465277
FBgn0010389	0.00596865	0.0322014
FBgn0028833	0.72708	0.597215
FBgn0051538	0.03691	0.0405714
FBgn0039336	0.0667146	0.0448783
FBgn0263048	0.139956	0.119904
FBgn0051004	0.0026413	0.00411428
FBgn0004622	0.209154	0.296712
FBgn0265426	0	0
FBgn0028671	1.14879	1.14619
FBgn0038964	0.410171	0.284224
FBgn0015622	0.696387	0.624763
FBgn0038552	0.180708	0.114731
FBgn0037826	0.00208921	0.0135262
FBgn0051064	0.521575	0.578289
FBgn0039651	0	0
FBti0019402	0.015565	0.021142
FBgn0037855	0.293038	0.267051
FBgn0264493	1.33303	1.37436
FBgn0039283	0.021975	0.0301446
FBgn0051344	0.231313	0.144055
FBgn0024912	0.201338	0.165619
FBgn0038389	0.245209	0.220656
FBgn0262125	0.347477	0.27156
FBgn0263490	0.221207	0.279023
FBgn0263414	0.00263405	0.0173772
FBgn0264826	0.000431418	0.00350362
FBti0059775	0	0.0010116
FBgn0044810	0	0
FBgn0082582	0.770822	0.804407
FBgn0020299	0.0112355	0.0553744
FBgn0037490	0.0749136	0.0456359
FBti0019301	0.000489198	0.00152155
FBgn0039094	0.00156099	0.000919255
FBgn0010774	0.762056	0.757859
FBgn0264324	0.3991	0.519768
FBgn0028670	0.00109428	0.00112162
FBgn0039006	0	0.00276661
FBgn0037332	0.25821	0.235221
FBgn0039691	0.0935487	0.084963
FBgn0037232	0.295766	0.298764
FBgn0037667	0.0255015	0.0270162
FBgn0023023	0.767501	0.666066
FBti0061797	0.00308821	0.00621995
FBgn0038862	0.197678	0.203465
FBgn0047114	0.089106	0.056281
FBgn0005355	0.114816	0.0858692
FBgn0039150	0.163873	0.120399
FBgn0027512	0.380585	0.393403
FBgn0039153	0.107437	0.0872551
FBgn0038679	0.11907	0.216835
FBgn0038581	0.184791	0.162229
FBgn0027655	0.396271	0.443976
FBgn0013953	0.00119939	0.00181518
FBgn0285937	0.98601	0.999935
FBgn0038258	0	0.0100521
FBgn0004885	0.583457	0.572438
FBgn0053110	0.000983072	0
FBgn0038510	0	0
FBgn0037644	0.150994	0.097148
FBgn0039155	0.00138205	0
FBgn0039183	0.0442917	0.0408476
FBgn0017577	0.0037924	0.00332438
FBgn0038811	0.115852	0.0703774
FBgn0267201	0.00496947	0.00806088
FBgn0024509	0.416495	0.322852
FBgn0053098	0	0.000427282
FBgn0051102	0.00547931	0.000680903
FBgn0010038	0.000369487	0.00133557
FBgn0038660	0.00402902	0.013146
FBgn0262146	0.00468089	0.0126237
FBgn0037535	0.266586	0.20116
RR48337-transposable-element	0.00216583	0.00316501
FBgn0015011	0.000827768	0.000510548
FBgn0051368	0.166061	0.168072
FBgn0039329	0.0949483	0.108671
FBgn0037617	0.0699805	0.0957733
FBgn0039663	0.0434014	0.101352
FBgn0000024	2.40237	2.53163
FBti0059666	0.217841	0.202291
FBgn0045866	0.477741	0.400008
FBgn0038053	0.353196	0.252127
FBgn0266756	0.423756	0.556052
FBgn0037756	0.281582	0.221026
FBgn0051148	0.00104306	0
FBgn0037265	0.0827071	0.0572826
FBgn0039326	0.000706804	0.000688829
FBgn0000303	1.94124	1.77125
FBgn0051342	0.306552	0.315865
FBti0019394	0.0011179	0.000431497
FBgn0037251	0.210232	0.149154
FBgn0262825	0.00421755	0.00346411
FBgn0039800	0.0793003	0.0398118
RR48385-transposable-element	0.0044006	0.0034153
FBgn0262801	0.437919	0.309758
FBgn0265376	0.0647103	0.0729289
FBgn0051365	0.153387	0.132301
FBgn0037788	0.028957	0.0877577
FBgn0000463	0.0488992	0.0267809
FBgn0011217	1.54302	1.56823
FBgn0038609	0.076698	0.0596336
FBgn0039640	0.00159056	0.00405212
FBgn0039555	0.227245	0.210667
FBgn0038585	0.30404	0.144036
FBgn0083991	0.59664	0.631157
FBgn0051151	1.00888	1.0175
FBgn0039886	0.00938074	0.00913483
FBgn0037536	0.440802	0.506514
FBgn0038651	0.171414	0.208359
FBgn0039212	0.267706	0.225403
FBgn0265101	0.248954	0.181377
FBgn0051216	0.0357133	0.0347905
FBgn0051279	0.00383623	0.00101466
FBgn0044812	0.00989513	0.00229315
FBgn0038583	0.162146	0.161798
FBgn0039335	0.066725	0.0455333
FBgn0039757	2.04198	1.72431
FBgn0039241	0.0164059	0.0240777
FBgn0024432	0.651346	0.581802
FBgn0040571	0.137006	0.255251
FBgn0015331	0.126768	0.135866
FBgn0037482	0.248382	0.229504
FBgn0038948	0.133797	0.10042
FBgn0039159	0.432586	0.341968
FBgn0286042	0.0115037	0.0129842
FBgn0038425	0.0988434	0.0655124
FBgn0039045	0.000445275	0.000847186
FBgn0040532	0.160129	0.413302
FBgn0038893	0.135971	0.104679
FBgn0022349	0.797592	0.693587
FBgn0038325	0.150314	0.165384
FBgn0038304	0.132924	0.0979515
FBgn0038532	0.146976	0.178999
FBgn0039855	0.0116636	0.00455999
FBgn0037291	0.00384683	0.000318215
FBgn0013981	2.68395	2.32017
FBgn0037687	0.0541226	0.0293887
FBgn0013759	2.61139	2.63969
FBgn0038889	0.0947557	0.0651793
FBti0019334	0.00116603	0.000486595
FBgn0024555	0.883098	0.969956
FBti0020301	0.00342504	0.00731543
FBgn0261641	1.31747	1.32299
FBgn0039737	0.870435	0.575701
FBgn0086605	0.27406	0.228489
FBti0019288	0.0034009	0.0115521
RR48333-transposable-element	0.00745836	0.0143261
FBgn0022787	0.508493	0.471104
FBgn0039564	0.016391	0.00717477
FBgn0027610	0.256645	0.288242
FBgn0038388	0.459289	0.318304
FBgn0266053	0.253242	0.283818
FBgn0038653	1.55707	1.63314
FBgn0037973	0.00559754	0.000426376
FBti0019439	0.0145293	0.0117393
FBgn0038084	0.306961	0.332543
FBgn0039756	0.00467219	0.0113332
FBgn0086371	0.20954	0.115621
FBgn0024321	1.00048	1.01819
FBgn0260243	0.181253	0.139722
FBgn0259740	0.283175	0.186677
FBgn0039227	0.132898	0.161329
FBgn0038665	0.0400638	0.14556
FBgn0038312	0.0318302	0.0163962
FBgn0040283	0.608547	0.592852
FBgn0015222	1.8411	1.65231
FBgn0013347	0.607968	0.497018
FBgn0038079	0.00199828	0.00187147
FBgn0037520	0.00560929	0.00375046
FBgn0037263	0.0129319	0.0107405
FBgn0051229	0.292461	0.273825
FBgn0038803	0.206197	0.253581
FBgn0038172	0.0417672	0.0403804
FBgn0085438	0.0116819	0.0164314
FBti0019356	0.000794521	0.0021023
FBgn0261984	0.301546	0.364896
FBgn0083975	1.24401	1.40424
FBgn0037627	0.00102904	0.00177587
FBgn0267742	0.00156511	0.00238598
FBgn0266252	0	0.005117
FBgn0008646	0	0.00105069
FBgn0039282	0.823842	0.91383
FBgn0039017	0.0377925	0.0277449
FBgn0037879	0.00423257	0.00609644
FBgn0259938	0.694169	0.556978
FBgn0004597	0.186133	0.104861
FBgn0039637	0.196697	0.237729
FBgn0037589	0.0306158	0.0214877
FBgn0038872	0.436769	0.487147
FBgn0039273	0.114586	0.0702748
FBgn0039116	0.465725	0.38366
FBgn0037503	0.00105684	0.00147145
FBgn0250755	0.0654401	0.0597773
FBgn0038596	0.463976	0.39548
FBgn0037989	0.447804	0.49822
FBgn0037713	0.119605	0.0425602
FBgn0038686	0.210649	0.200443
FBgn0037778	0.025582	0.0413203
FBgn0051469	0.0139658	0.00967362
FBgn0037615	0	0.000984859
FBgn0027338	0.831094	0.838589
FBgn0263143	0.0130995	0.0151014
FBgn0266705	0.0260503	0.0147432
FBgn0003884	2.06088	1.69075
FBgn0010433	0	0.000236575
FBgn0051051	0.396336	0.291778
FBgn0262483	2.02392	2.01698
FBgn0039600	1.11267	0.984405
FBgn0003339	0.00477688	0.00306954
FBgn0051111	0.142589	0.111739
FBgn0250753	1.27787	1.15982
FBgn0038472	0.20701	0.168875
FBgn0266401	0.00774435	0.0128184
FBgn0001234	4.81757	4.92227
FBgn0265140	0.54151	0.611285
FBgn0038324	0.0565608	0.0353968
FBgn0015282	0.416742	0.382481
FBgn0037652	0.209666	0.159734
FBti0020294	0.0241687	0.0223333
FBgn0003308	0.00449775	0.00117186
FBgn0039294	0.00127681	0.00116897
FBgn0038282	2.05093	2.15575
FBgn0266801	1.61441	1.64756
FBgn0038608	0	0
FBgn0020407	0.044094	0.0318048
FBgn0039452	0.000854277	0.00079749
FBgn0028992	0.22728	0.164985
FBgn0003093	1.72429	1.75242
FBgn0037280	0	0.0014216
FBgn0039099	0.0121224	0.0216055
FBgn0038845	0.000778707	0
FBgn0038427	0.284848	0.283997
FBgn0038681	0.00394232	0.0170603
FBgn0039831	1.59784	1.61805
FBgn0039175	0.0945265	0.0529223
FBgn0027378	0.339122	0.253
FBgn0038593	0.083278	0.101712
FBgn0037960	0.0171963	0.00823013
FBgn0039115	0.255373	0.184031
FBgn0038327	0.0852301	0.0632728
FBgn0261928	1.78946	1.87677
FBgn0003598	0.149754	0.158616
FBgn0037398	0.00950232	0.00323275
FBgn0010355	0.305782	0.38425
FBgn0010173	0.194224	0.128417
FBgn0039736	0	0
FBti0019304	0.00435478	0.0156411
FBgn0261808	0.172407	0.161954
FBti0020330	0.00352793	0.000545276
FBgn0040534	0.571552	0.492333
FBgn0037739	0.149659	0.108165
FBgn0038353	0.00836064	0.00419415
FBgn0053202	1.26386	1.30912
FBti0019448	0.00393132	0.0164049
FBgn0039135	0.475302	0.583829
FBgn0265420	0.0428934	0.0789322
FBgn0039844	0.685112	0.713048
FBgn0266390	0.00931703	0.0259898
FBgn0037468	0.631206	0.488822
FBgn0038080	0.306935	0.11329
FBgn0051092	0.501501	0.583415
FBgn0010313	1.35608	1.39017
FBgn0038487	0.00417205	0.0220608
FBgn0042104	0.000780433	0
FBgn0011582	0.946286	1.03371
FBgn0040670	0.0317635	0.0259807
FBgn0037895	0.0211954	0.00830438
FBgn0069923	1.59084	1.39857
FBgn0051029	0.00306927	0.00291808
FBgn0040601	0	0
FBti0062536	0.00118755	0.00607115
FBgn0039678	0.000940532	0
FBgn0037638	0.0830922	0.0910456
FBti0019373	0.0141229	0.00514013
FBgn0039505	0.482893	0.305881
FBgn0039816	0.576516	0.514931
FBgn0250839	0.730143	0.856819
FBgn0039788	0.000559641	0.000261274
FBgn0028468	0.00791861	0.00908537
FBgn0039862	0.826568	0.882072
FBgn0003482	0.00141424	0.000575699
FBgn0038548	0.0603138	0.065883
FBgn0013973	0.794387	0.789331
FBgn0037892	0.344936	0.304957
FBgn0086686	1.89821	2.05929
FBgn0051473	0.0106337	0.0105848
FBti0059723	0	0.000500889
FBgn0038598	0.0136277	0.00942605
FBgn0261049	0.125524	0.114808
FBgn0039337	0.241972	0.207844
FBgn0021750	0.0711928	0.0698503
FBgn0037686	2.04145	1.71477
FBti0019339	0.00969629	0.00758171
FBgn0038968	0.0515612	0.0565645
FBgn0263316	0.0140495	0.0070575
FBgn0039343	0	0
FBgn0038547	0.0926634	0.124476
FBgn0010812	0.122174	0.0973557
FBgn0259215	0.00294918	0.00762787
FBgn0085331	0.00199186	0.00283415
FBgn0037958	0.0317452	0.0220326
FBgn0002733	0.00447387	0.00166045
FBgn0263626	0.0111096	0.00829407
FBgn0265164	0.0196637	0.0252599
FBgn0083969	0.377589	0.462784
FBti0059720	0.0319418	0.0375746
FBgn0039525	0.161308	0.106942
FBgn0285963	0.734968	0.784217
FBgn0266753	0.00256773	0.0127274
FBgn0028717	0.727409	0.749616
FBgn0038307	0.465217	0.36358
FBgn0051126	0.377655	0.307166
FBgn0037543	0.110789	0.0635685
FBgn0262081	1.13092	1.17516
FBgn0262972	0.0505057	0.246123
FBgn0037688	0.0745215	0.0710333
FBgn0027514	0.149238	0.128696
FBgn0051040	0.137626	0.147764
FBgn0037515	0.00612489	0.00472288
FBgn0267815	0.00196237	0.00258825
FBgn0011281	0.00671045	0.00669052
FBgn0037297	0.169101	0.144635
FBgn0266137	0.67308	0.574882
FBgn0051005	0.282729	0.247974
FBgn0037473	0.184649	0.139942
FBgn0039380	1.24794	1.4019
FBgn0043005	0.000563222	0
FBgn0002941	0.0281823	0.0294029
FBgn0037810	0.190139	0.147844
FBgn0051223	0.0874428	0.0483572
FBgn0039043	0.00116449	0.000339132
FBgn0260990	0.382905	0.362968
FBgn0037646	0.0557956	0.043282
FBgn0003861	0	0.00170189
FBti0061864	0.00498726	0.00730829
FBgn0264839	0.00102187	0.00186497
FBgn0260742	0.656108	0.627026
FBgn0051248	0.0185681	0.0500376
FBgn0260462	0.665033	0.679496
FBgn0037312	0.252241	0.156467
FBti0062082	0.0335642	0.0248683
FBgn0037342	0.288556	0.188883
FBgn0261004	0.0333062	0.0278144
FBgn0027376	0.00230731	0.00305651
FBgn0004049	0.806188	0.741861
FBgn0039733	0.247214	0.179937
FBgn0039209	1.40416	1.47583
FBti0019469	0.0505522	0.0125154
FBgn0267778	0	0.00521365
FBgn0038857	0.142081	0.11578
FBgn0037696	0.00251435	0.00407404
FBgn0265380	0.00311099	0.00272502
FBgn0037655	0.561848	0.530223
FBgn0264785	0.343162	0.408001
FBgn0038925	0.732685	0.558381
FBgn0267763	0.00541367	0.00572553
FBgn0015570	0.0050431	0.00095676
FBgn0038541	0.00218162	0.00314942
FBgn0038934	0.0825081	0.0896788
FBgn0000477	0.0527187	0.0220131
FBgn0038236	0.0068758	0.00385667
FBgn0004595	3.83789	4.16158
FBgn0261046	0.895009	0.968417
FBgn0062442	0.790276	0.587413
FBgn0038795	0.0171103	0.0132614
FBgn0038984	0.648609	0.584686
FBti0019399	0.00146312	0.001548
FBgn0039188	0.19893	0.160043
FBgn0037900	0.164784	0.109537
FBgn0000455	0.270275	0.188328
FBgn0038603	0.359315	0.292934
FBgn0038233	0.152025	0.160583
FBgn0039075	0.542377	0.468771
FBgn0287605	0.00113961	0
FBgn0039249	0.0783839	0.0842769
FBgn0265421	0.00151746	0.00211553
FBgn0038272	0.117397	0.071828
FBgn0038855	0.0668001	0.0982287
FBgn0041605	3.39564	3.38615
FBgn0260487	0.0160644	0.0159972
FBgn0038194	0.0881706	0.00164928
FBgn0038039	0.166496	0.166418
FBgn0038316	0.342076	0.28358
FBgn0039730	0.466962	0.325122
FBti0019305	0.0302278	0.0356109
FBgn0038243	0.0609761	0.0147151
FBgn0028646	0.355817	0.296977
FBgn0038662	0.365339	0.318709
FBgn0029176	0.467319	0.367977
FBgn0260386	0.00623132	0.0199536
FBgn0010051	0.441199	0.467698
FBti0148146	0.00396838	0.00388005
FBgn0037870	0.0488845	0
FBgn0037566	0.512555	0.381802
FBgn0037736	0.890154	0.851994
FBti0062444	0.0257547	0.0195922
FBgn0016693	0.367068	0.364766
FBgn0265190	0.100471	0.102131
FBgn0261279	0.42837	0.416148
FBgn0263974	0.013979	0.00757269
FBgn0004644	0	0.000360005
FBgn0039003	0.119115	0.0793845
FBgn0038166	0.14104	0.0961816
FBgn0085405	0.126213	0.131901
FBgn0037238	1.49489	1.33993
FBgn0051041	0.00752429	0.000685526
FBgn0004237	0.730856	0.650457
FBgn0085376	0.512414	0.537343
FBgn0259823	0.731726	0.825168
FBgn0051036	0.00170452	0.00384267
FBgn0037643	1.01074	0.843928
FBgn0265048	0.00442972	0.00163187
FBgn0037262	0.528166	0.457999
FBgn0004882	0.296075	0.290661
FBgn0264075	0.238997	0.224465
FBgn0038705	0.00302271	0.00934742
FBgn0025456	0.0411196	0.0547107
FBgn0039628	0.00394222	0.00917177
FBgn0085412	1.24134	1.3583
FBgn0037293	0.119452	0.130123
FBgn0263782	0.138597	0.117371
FBgn0027109	0	0
FBgn0267570	0.100925	0.101023
FBgn0085431	0.00301445	0.000368714
FBgn0052855	0.00744864	0.00161253
FBgn0000071	0.000539408	0.00113869
FBgn0046114	0.322844	0.230828
FBgn0038326	0.22329	0.16778
FBgn0026257	0.0277838	0.0489505
FBgn0037931	0.156061	0.134726
FBgn0023495	0.00116141	0.00274487
FBgn0267229	0.0431733	0.0505211
FBgn0287209	0.065017	0.00368611
FBgn0261638	0	0.0023451
FBgn0037758	0.205133	0.269198
FBti0019438	0.00194563	0.0004271
FBgn0038818	0.0151853	0.014892
FBgn0037378	0.194826	0.157007
FBgn0039342	0.00249926	0
FBgn0039612	0.00564215	0.0107079
FBgn0015790	0.909807	0.865391
FBgn0039631	0.0524108	0.0775447
FBgn0039178	0.00214838	0.0147871
FBgn0264986	0.00490791	0.00481121
FBgn0085433	0.597309	0.577041
FBgn0037702	0.475913	0.524549
FBgn0037924	0.126616	0.1086
FBgn0027579	0.0680941	0.0343645
FBgn0086362	0.125342	0.108426
FBgn0038295	0.206528	0.269937
FBgn0029170	0.00302891	0.00469332
FBgn0261086	0.4673	0.497623
FBgn0037814	0.156099	0.125542
FBgn0037922	0.162931	0.133301
FBgn0016672	0.65545	0.501266
FBgn0028475	0.172501	0.208086
FBgn0263231	1.5659	1.55538
FBgn0001180	0.0314445	0.0604803
FBgn0051272	0	0.00261469
FBgn0037440	0.024277	0.0277335
FBgn0045473	0.000996989	0.00216389
FBgn0039616	0.00158551	0.00208808
FBgn0037317	0.285528	0.20192
FBgn0039673	0.00133945	0.00321364
FBgn0013812	0.000963172	0
[truncated: 14,074 more rows]

## Sheet: Unannotated_2
geneID	control_normalizedReadsCounts	tau P251L KI_normalizedReadsCounts
FBgn0250732	0.182844	0.199697
FBgn0037409	0.00521847	0
FBgn0027948	0.772461	0.858109
FBgn0038675	0.221949	0.192972
FBgn0000500	0.255338	0.0642774
FBgn0037610	0.0595847	0.0537365
FBgn0267571	0.271805	0.237843
FBgn0261859	0.864593	0.817378
FBgn0037363	0.775091	0.909686
FBgn0039552	0.027339	0.0262246
FBgn0039732	0.0494819	0.0410756
FBgn0038224	0.811938	0.882145
FBgn0264776	0.0628294	0.00212773
FBgn0038525	0	0.00280976
FBgn0261436	0.121117	0.0859993
FBgn0038814	0.0416067	0.00448428
FBgn0286871	0.00271566	0.00425322
FBgn0038279	0	0.00440473
FBgn0037625	0.450899	0.33686
FBti0019436	0.0475773	0.0434093
FBgn0027574	0.178365	0.160661
FBgn0260746	0.0154258	0.0181445
FBgn0037930	0.0799133	0.149775
FBgn0027095	0.137786	0.208513
FBgn0051450	0.194087	0.197601
FBgn0037794	0.144731	0.170013
FBgn0039229	1.93997	1.74226
FBti0019348	0.0583023	0
FBgn0038737	0.0588709	0.0631041
FBti0019411	0.0398325	0.023471
FBti0020393	0.0215308	0.010119
FBgn0039291	0.0328286	0.0521813
FBgn0037547	0.0650073	0.00796246
FBgn0038966	0.0235057	0.018569
FBgn0037690	0.168934	0.198788
FBti0019321	0.0181819	0.00476832
FBgn0038055	0.212593	0.192804
FBgn0261792	0.0914576	0.0879982
FBgn0040606	0.0928702	0.0396294
FBgn0037709	0.00277033	0.0143145
FBti0062552	0.0314922	0.0102179
FBgn0037777	0.0847785	0.102523
FBgn0046685	0.0335165	0.0299685
FBgn0039313	0.0147402	0.0286196
FBgn0004395	0.945453	1.13458
FBgn0266674	0.0564703	0.053344
FBgn0039019	0.0413648	0.0849126
FBgn0039172	0.184177	0.171021
RR46358-transposable-element	0.959676	0.736852
FBgn0011290	0.37305	0.551339
FBgn0267816	0.00308503	0.00334232
FBgn0037747	0.282657	0.310601
FBgn0039073	0.0708416	0.00261874
FBgn0040256	0.00594705	0.00107022
FBgn0039404	0.1115	0.142424
FBgn0005674	0.142982	0.102164
FBgn0011768	0.0986901	0.0447002
FBgn0037917	0.353888	0.423787
FBgn0086365	0.0239762	0.0179273
FBgn0017567	0.4194	0.420268
FBgn0039290	0.160017	0.169846
FBti0019361	0.00175803	0
FBgn0051287	0.00801485	0.00423198
FBgn0038577	0.0501517	0.0370567
FBgn0037720	0.0722852	0.102587
FBgn0001112	0	0.007211
FBgn0038344	0.13016	0.0955907
FBgn0037678	0.0262331	0.0235039
FBgn0267709	0.00512768	0.00298139
RR48352-transposable-element	0.0485922	0.0159663
FBgn0051072	0.518023	0.495947
FBgn0013277	0.130931	0.00052302
FBgn0037718	0.166446	0.109812
FBgn0286071	0.00225811	0.00593291
FBgn0265197	0.00761461	0.00883792
FBgn0003002	0.0595342	0.0961462
FBgn0041588	0.136109	0.108506
FBgn0039557	0.114677	0.128049
FBti0020309	0.0115962	0.00538005
FBgn0051028	0.00670935	0.00174326
FBgn0266598	0.00638692	0.00161721
FBgn0038725	0.685889	0.514912
FBgn0263757	0.00292336	0
FBgn0039277	0.34176	0.346505
FBgn0039302	0.504539	0.447178
FBgn0039461	0.150018	0.136002
FBgn0037894	0.088689	0.0530484
FBgn0039817	0.00433582	0.0057763
FBgn0051224	0.781371	0.789843
FBgn0054008	0	0.00315534
FBgn0013276	1.5049	1.90957
FBgn0039714	0.192765	0.194276
FBgn0037802	0.00311431	0.0123824
FBgn0039328	0.00712378	0.0155891
FBgn0051116	0.118967	0.190042
FBgn0266672	0.243534	0.254336
FBgn0037292	0.0143567	0.00203953
FBgn0017550	0.573834	0.598952
FBgn0037679	0.262363	0.261542
FBgn0040609	0.0064101	0.00762253
FBgn0038113	0.00967148	0.00347122
FBgn0014931	0	0.00608252
FBgn0267408	0.0570158	0.0104493
FBgn0038115	0.035842	0.0590079
FBgn0038745	0.355321	0.367501
FBgn0038321	0.346398	0.350639
FBgn0263594	0.990535	1.05
FBgn0083984	0.056298	0.0694875
FBgn0015568	0.0168445	0
FBgn0038881	2.2447	2.0414
FBgn0259139	1.03837	1.00595
FBgn0039258	0.0586884	0.048297
FBgn0039415	0.0297403	0.0300628
FBgn0264427	0.0992311	0.113348
FBgn0004841	0.167622	0.179772
FBgn0275433	0.0294249	0.0218495
FBti0019345	0	0.0043791
FBgn0002924	0.0152779	0.0152918
FBgn0051211	1.28132	1.0776
FBgn0267612	0.0305326	0.012885
FBgn0037993	0.443746	0.388361
FBgn0262962	0.0225789	0.0329075
FBgn0038049	0.203764	0.173908
FBgn0005777	0.224117	0.202828
FBgn0261238	0.926405	0.90053
FBgn0037891	0.62546	0.532578
FBgn0039182	0.186016	0.142441
FBgn0085345	0	0.00299139
FBgn0085383	1.35682	1.20002
FBgn0040080	0.193534	0.165779
FBgn0037383	0.0530218	0.0271925
FBgn0037779	0.00987955	0.0125387
FBgn0000533	0.014582	0.0106727
FBgn0263025	0.0196896	0.0278349
FBgn0264291	0.0266286	0.0451441
FBti0019286	0.0177465	0.0159434
FBgn0010340	0.0811686	0.0931938
FBgn0039722	0.0114442	0.30258
FBgn0038490	0.0440544	0.0562926
FBgn0265276	1.56441	1.5757
FBgn0014930	0.0926888	0.0862477
FBgn0038809	0.274048	0.315432
FBgn0038678	0.29985	0.268119
FBgn0037478	0.0923711	0.0899418
FBgn0038428	0.147284	0.149193
FBgn0038853	1.38381	1.43124
FBgn0038306	0.0304599	0.0456032
FBgn0046876	0.00170855	0
FBgn0051320	0.374482	0.218575
FBgn0051184	0.0532868	0.0742774
FBgn0037276	0.0146543	0.00985589
FBgn0039870	0.0595952	0.0676793
FBgn0003165	2.62726	2.5212
FBgn0039463	0.00264264	0.00284417
FBgn0038760	0.0732145	0.0502177
FBgn0002781	1.1167	1.00605
FBgn0039311	0.105828	0.185574
FBgn0038034	0.0280247	0.0444171
FBgn0053970	0.0137745	0.00692253
FBgn0038332	0.097356	0.0924806
FBgn0024957	0.17142	0.134245
FBgn0023212	0.259355	0.253064
FBti0061713	0.0053292	0.0131035
FBgn0027492	2.03708	1.99058
FBgn0011289	0.240126	0.244333
FBti0019404	0.0108206	0
FBgn0015269	1.10555	1.10648
FBgn0010399	0.826454	0.682457
FBgn0266750	0.694634	0.656478
FBgn0039054	1.54216	1.6049
FBgn0286828	0.151688	0.106063
FBgn0028734	0.787871	0.747163
FBgn0039789	0.00312773	0.00346678
FBgn0037849	0.261708	0.304022
FBgn0011766	0.967098	1.03631
FBgn0267430	0.093934	0.0631155
FBti0020308	0	0.000801682
FBgn0051510	0.528218	0.454695
FBti0019447	0.0424657	0.0160545
FBgn0038535	0.923515	0.926706
FBgn0260444	0.211153	0.11938
FBgn0038437	0.0711728	0.0687636
FBgn0038369	0.164463	0.170914
FBti0019461	0.542252	0.347406
FBgn0262904	0.0641085	0.0563723
FBgn0263047	0.0198195	0.0197543
FBgn0011785	0.416765	0.433635
FBgn0037705	1.57821	1.57698
FBgn0038454	0.117189	0.116463
FBgn0260743	0.323316	0.312073
FBgn0039879	0.00425536	0.00145896
FBgn0267116	0	0.00150522
FBgn0039820	0.00438154	0.00335004
FBgn0067629	0.0282311	0.0216581
FBgn0017590	1.83269	1.65749
FBgn0039726	0.0869065	0.0778498
FBgn0260634	1.11494	1.07732
FBgn0037231	0.520621	0.544058
FBgn0267685	0	0.0132077
FBgn0037817	0.0069141	0.0349672
FBgn0262858	0.249024	0.188499
FBgn0004876	1.05299	1.0579
FBgn0039685	0.0592421	0.139434
FBgn0004117	0.0539085	0.0380609
FBgn0037811	0.00754483	0.00728325
FBgn0038354	0.0350164	0.062084
FBgn0037834	0.0809785	0.076709
FBgn0003248	0.801987	0.717021
FBgn0000723	0.14641	0.100962
FBgn0051030	1.07914	1.01797
FBgn0038199	0.0139745	0.0169303
FBgn0037313	0.473093	0.502789
FBgn0037890	0.315492	0.309254
FBgn0039350	0.446956	0.471812
FBgn0037546	0.321359	0.391027
FBgn0015781	0.0853591	0.0790332
FBgn0002522	0.00774358	0.00641817
FBgn0037737	0.552371	0.498597
FBgn0051551	0.0111426	0.0143175
FBgn0051514	0.000846925	0
FBti0019380	0.156214	0.0726984
FBgn0039215	0.300036	0.280256
FBgn0264901	0.0783495	0.146428
FBgn0037943	0.077922	0.120832
FBgn0038478	0.358656	0.360205
FBgn0028684	0.152145	0.167667
FBgn0051195	0.138577	0.13988
FBgn0028487	0.193155	0.176893
FBgn0002719	0.400027	0.441431
FBgn0027841	0.0358034	0.0515019
FBgn0261479	0.0915001	0.0851417
FBgn0039696	0.157813	0.108848
FBgn0038331	0.260543	0.29743
FBgn0051202	0.0056664	0.00437155
FBgn0267118	0.00567849	0.00601061
FBgn0039261	0.540547	0.567228
FBgn0266744	0.00556667	0.0168729
FBgn0267337	0.416686	0.362324
FBgn0037746	0	0.0111819
FBgn0038854	0.0560906	0.0672622
FBgn0267200	0.0067472	0.00675485
FBgn0037656	0.0443635	0.0554598
FBgn0037700	0.133634	0.133339
FBgn0038839	0.751673	0.973575
FBgn0037466	0.896835	0.758346
FBti0019320	0	0.00323201
FBgn0039101	0.0191027	0.0116303
FBgn0011655	0.310569	0.377516
FBgn0039274	0.0432352	0.0248736
FBgn0039731	0.0322998	0.0228529
FBti0019466	0.105942	0.0808388
FBgn0039250	0.0046521	0.0139664
FBgn0015513	0.317196	0.40742
FBgn0017581	2.37023	2.64456
FBgn0020249	0.459636	0.402305
FBgn0040600	0.350416	0.618687
FBgn0024329	0.287604	0.214883
FBgn0004842	0.0481852	0.0339936
FBgn0039465	0.901027	1.07473
FBgn0013343	2.53708	2.51872
FBgn0002940	0.351041	0.496321
FBgn0027873	0.0350362	0.0847194
FBgn0038197	0.0499658	0.0509128
FBgn0039346	0.633434	0.502147
FBgn0266372	0	0.00373819
FBgn0038952	0.172273	0.13337
FBgn0000139	0.139182	0.110568
FBgn0020238	2.14821	2.27719
FBgn0038476	0.229169	0.290322
FBgn0039341	0.132945	0.0632505
FBgn0037850	0.0211674	0.013455
FBgn0037908	0.216149	0.22771
FBgn0037270	0.807363	0.651465
FBgn0038540	0.181423	0.137362
FBgn0038965	0.212692	0.186732
FBgn0039609	0.0176861	0.00429301
FBgn0003268	0.0742746	0.0858829
FBgn0260935	0.112282	0.130779
FBgn0026566	0.218388	0.137592
FBgn0266700	0.0183254	0.0240719
FBgn0037540	0.0570929	0.0423395
FBgn0039703	0.00489464	0.00392068
FBgn0039529	0	0.00260197
FBgn0044871	0.100414	0.114605
FBgn0039674	0.226771	0.300177
FBgn0051522	0.607495	0.535882
FBgn0283535	1.28252	1.36851
FBgn0023083	0.32081	0.409941
FBgn0037902	0.292982	0.248026
FBgn0051133	0.0223636	0.0297426
FBgn0004107	0.0771865	0.0834514
FBti0063150	0.0621453	0.0335306
FBgn0250823	1.88565	1.78224
FBgn0037950	0.0106858	0.0233346
FBgn0037714	0.00949703	0.011043
RR48301-transposable-element	0.0138543	0.00363575
FBgn0037844	0.00216117	0.014746
FBgn0267199	0.00480328	0.000363995
FBgn0037883	0.0119226	0.0305906
FBgn0039877	0.00735136	0.0024365
FBgn0038206	0.0836764	0.116605
FBti0059759	0.0599161	0.0574378
FBgn0039764	0.237657	0.259909
FBgn0038402	0.0233828	0.0315483
FBgn0039286	0.160666	0.132204
FBgn0038183	0.0609814	0.0427163
FBgn0038412	0.00850799	0.00611471
FBgn0038806	0.13997	0.0974767
FBgn0022943	0.126296	0.122764
FBgn0005585	1.28472	0.767713
FBgn0040212	0.195738	0.201386
FBgn0053189	0.00302623	0.00259026
FBgn0040551	0.00592249	0.0154389
FBgn0261885	1.64866	1.5548
FBgn0039494	0.181876	0.0351135
FBgn0037955	0.141503	0.136835
FBgn0011701	0.0783989	0.107104
FBgn0086253	0.0280695	0.0146246
FBgn0038498	1.34582	1.39328
FBti0020312	0.00175803	0.00344781
FBti0019299	0.123128	0.20751
FBgn0038592	0.0145498	0.0260091
FBgn0063127	0.0165516	0.0160962
FBgn0038257	0.00780869	0.000979658
FBgn0263453	0.00884446	0.0120081
FBgn0264841	0	0.00229035
FBgn0015240	0.138015	0.127755
FBgn0261261	0.739857	0.793035
FBgn0039109	0.221761	0.23236
FBgn0027563	0.228831	0.055971
FBgn0004387	0.721578	0.68213
FBgn0265068	0.0108596	0.0154298
FBgn0038195	0.508434	0.513368
FBgn0262477	1.63215	1.52895
FBgn0039543	0.0870287	0.0944562
FBgn0020018	0.0241777	0.0305008
FBgn0267435	0.0121534	0.0233023
FBgn0014366	0.0674333	0.0542845
FBgn0037305	0.0809359	0.0883935
FBgn0037670	0.0685974	0.132663
FBgn0037923	0.0614489	0.04768
FBgn0264912	0.00409495	0.00337692
FBgn0037708	0.055875	0.0382844
FBgn0038589	0.0510146	0.0469619
FBgn0040078	0.0488411	0.0555389
FBgn0038165	1.60661	1.36568
FBgn0037668	0.00770079	0.00490243
FBgn0266717	1.11712	1.04565
FBgn0039026	1.12066	1.1338
FBgn0039332	0.323307	0.722068
FBgn0039635	0.596826	0.603142
RR48332-transposable-element	0.00134112	0.00322143
FBgn0038029	0	0.00625529
FBgn0038755	0.490138	0.558704
FBgn0260440	0.0670282	0.0332243
FBgn0038744	0.00909683	0.0164282
FBgn0026315	0	0.00572169
FBgn0003651	0.274963	0.266975
FBti0019396	0.331474	1.09341
FBgn0085391	2.28238	2.32393
FBgn0038170	0.0245775	0.0201393
FBgn0005649	0.890765	0.867611
FBti0062875	0.00592101	0.00186729
FBgn0039536	1.70515	1.56826
FBgn0262559	0.818234	0.762997
FBgn0037326	1.25142	1.03084
FBti0020313	0.0237918	0.0129912
FBgn0037377	0.0817794	0.0931516
FBti0063296	0	0.00144823
FBgn0037743	0.153596	0.136158
FBgn0267702	0.00728228	0.00972236
FBgn0039431	1.04487	1.06314
FBgn0038475	0.112398	0.114327
FBgn0263117	0.0497295	0.0595778
FBgn0039240	0.588435	0.646967
FBti0020323	0.00636387	0.0147303
FBgn0037815	0.0179251	0.0205088
FBgn0265422	0.0099136	0.00339067
FBti0019405	0.0586224	0.0220088
FBgn0039804	0.00393794	0.00859372
FBgn0086134	0.211095	0.200314
FBgn0027570	0.0406918	0.0616621
FBgn0037933	0.224368	0.248833
FBgn0037299	0.138031	0.140123
FBgn0037912	0.0130139	0.0131608
FBgn0037279	0.134073	0.182759
FBgn0038145	0.649696	0.687525
FBgn0053293	0.00606571	0.00144398
FBgn0038740	0.414868	0.434353
FBgn0001297	0.595421	0.828273
FBgn0028968	0.231453	0.234505
FBgn0013767	0.40812	0.0769905
FBgn0040582	0.0501415	0.00929355
FBgn0038390	0.00273364	0.0130934
FBgn0264827	0	0
FBgn0003512	0.130907	0.110109
FBgn0024909	0.156422	0.158307
FBgn0262983	0	0.000957728
FBgn0038450	0.024407	0.00173711
FBgn0038866	0.122019	0.0726262
FBti0019297	0.0077569	0.00137632
FBti0019431	0.0201	0.0152368
FBgn0038894	0.00382633	0.00699897
FBgn0039876	0.0628765	0.0973498
FBgn0022344	0.196025	0.177097
FBgn0038989	0.0883537	0.0831746
FBgn0026441	0.379959	0.444877
FBgn0038980	1.0091	0.837074
FBgn0016119	0.952305	0.89979
FBgn0267753	0.0016712	0.00219905
FBgn0010770	0.0989096	0.0693657
FBgn0038196	0.296654	0.254443
FBgn0016650	0.0373807	0.0508745
FBti0061737	0.0376258	0.0306413
FBgn0037354	0.0486626	0.0799154
FBgn0038461	0.0913757	0.108097
FBgn0000246	0.164914	0.147909
FBgn0038139	0.0545087	0.0715775
FBgn0039830	1.8891	1.93227
FBgn0037848	0.24497	0.258261
FBgn0038870	0.0638283	0.0894219
FBgn0086768	0.29596	0.307521
FBgn0039403	0.0126267	0.00802456
FBgn0285925	2.70154	2.63325
FBgn0063649	0.32437	0.372336
FBgn0038286	0.794497	0.854829
FBgn0027494	0	0.00327014
FBgn0039272	0.0328459	0.0213546
FBgn0040682	0	0.00512079
FBgn0039232	0.0175338	0.140899
FBgn0003480	0.0014313	0.00978268
FBgn0039734	0.322223	0.323628
FBgn0051388	0.117479	0.161153
FBgn0264816	0.0461547	0.0571793
FBgn0038303	0.108407	0.119976
FBgn0051441	0.028101	0.0365779
FBgn0038652	0.0181061	0.011037
FBgn0039611	0.0827493	0.0139952
FBgn0000447	0.125439	0.104289
FBgn0039300	1.76588	1.78772
FBgn0263022	0.00348419	0.00451751
FBgn0039022	0.0647782	0.0244987
FBgn0039098	0.0226191	0.0106826
FBgn0039626	0.237329	0.197598
FBgn0010768	0.194367	0.226798
FBgn0039848	0.00659972	0.00920187
FBti0019296	0.0637979	0.0306718
FBgn0085308	0.00560837	0.0203614
FBgn0037602	0.0440363	0.0262791
FBgn0039690	0.0837018	0.119727
FBgn0015402	0.23552	0.159908
FBgn0002773	0.023041	0.0583884
FBgn0026634	0.0540197	0.10119
FBgn0051217	0.0707048	0.0311624
FBgn0039379	0.173559	0.147854
FBgn0038361	0	0.000447606
FBgn0262127	0.351114	0.414195
FBgn0051019	0	0.00174018
FBgn0001321	0.0105749	0.011001
FBti0019398	0.0305158	0.00583873
FBgn0025781	0.0519733	0.0401225
FBgn0038275	0.106654	0.120076
FBgn0039254	0.222959	0.180331
FBti0019337	0.0228104	0.0307659
FBgn0039265	0.259005	0.136646
FBgn0038697	0.000840031	0.00130947
FBgn0263738	0.0326824	0.0128197
FBgn0037680	0.121141	0.126738
FBgn0243511	0.155387	0.18134
FBgn0039682	0.832704	0.327856
FBgn0020385	0.0734489	0.0309953
FBgn0000036	1.93463	1.87417
FBgn0038313	0.0744586	0.0709273
FBgn0267680	0.0178564	0.0181466
FBgn0039104	0	0
FBgn0038914	0.0488729	0.0057566
FBgn0260745	0.133696	0.319856
FBgn0038828	0.341451	0.34808
FBgn0037773	0.0334424	0.0612851
FBti0019468	0.0134191	0.0137521
FBgn0038642	0.000967176	0.00341972
FBgn0083950	1.67306	1.72645
FBti0020328	0.0106176	0.0662033
FBgn0000247	0.343785	0.259395
FBti0019429	0.0356433	0.0167955
FBgn0028374	0.131326	0.0704471
FBgn0266408	0.00769544	0.0208265
FBgn0038619	0.0865389	0.0827666
FBgn0038976	0.141423	0.154965
FBgn0043884	1.48616	1.47017
FBgn0038957	0.128789	0.0868757
FBgn0267801	0.0304976	0.0193763
FBgn0038247	0.00300858	0.00847421
FBgn0037213	0	0.00555634
FBgn0038827	0.0136093	0.0244234
FBgn0243512	0.679393	0.741172
FBgn0085320	0.00814593	0.00411159
FBgn0020626	0.211383	0.165159
FBgn0054027	0.011513	0.0239142
FBgn0038108	0.905053	0.810181
RR48372-transposable-element	0.02118	0.0119633
FBgn0266418	0.719693	0.658738
FBgn0039315	0.00436233	0
FBgn0267385	1.16885	1.12803
FBgn0037443	0.911929	0.845765
FBgn0038747	0.21865	0.187625
FBgn0039638	0.0202179	0.0109427
FBgn0004901	0.00729298	0.0154421
FBgn0038376	0.185669	0.177886
FBgn0038380	0.0138501	0.0116695
FBgn0039705	0.163291	0.144163
FBgn0038057	0.0481685	0.0447933
FBgn0023097	0.663682	0.560669
FBgn0083986	0.219697	0.211267
FBgn0037376	0.0749561	0.113931
FBgn0037249	0.497724	0.446366
FBgn0039531	0.0745171	0.0596995
FBgn0039883	2.21483	2.07923
FBti0019407	0.0324798	0.0253614
FBgn0039767	0.215721	0.186847
FBgn0264491	0.0238107	0.0702733
FBgn0266730	0.0399332	0.0181087
FBgn0002354	0.120658	0.16974
FBgn0038143	1.04345	1.09576
FBgn0263755	0.0184907	0.018592
FBti0020386	0.00265283	0.0203441
FBgn0001139	0.971507	0.868208
FBgn0041710	0.0455347	0.01628
FBgn0045862	0.178711	0.178691
FBgn0039064	2.28065	2.25836
FBgn0038638	0.0713487	0.0378044
FBgn0085382	1.09593	1.14139
FBgn0039048	0.0362564	0.015803
FBgn0005632	1.13664	1.08058
FBgn0037439	0.0867709	0.0552777
FBgn0085413	1.49498	1.502
FBgn0039491	0.0096656	0.0101932
FBgn0039413	0.0625567	0.0384135
FBgn0087013	0.479545	0.413179
FBgn0039509	0.121375	0.146232
FBgn0014342	0.0434433	0.0442297
FBgn0038607	0	0.00522273
FBgn0023178	0.00982273	0.390566
FBgn0051161	0.0717779	0.0767915
FBgn0037489	0.164169	0.126903
FBgn0037624	0.300019	0.34804
FBgn0039835	0.0887236	0.0955628
FBgn0259227	0.0821907	0.105382
FBgn0051361	1.34376	1.24103
FBgn0037722	0.0402534	0.0391005
FBgn0038865	0.0894105	0.0102165
FBgn0039854	0.153529	0.17949
FBgn0266413	0.00317683	0.00338644
FBgn0261575	0.0332947	0.0076652
FBgn0039861	0.461462	0.389011
FBgn0038460	0.0321199	0.0341537
FBgn0026562	0.565441	0.300392
FBgn0001230	1.72912	1.99693
FBgn0010438	0.143598	0.0967894
RR48405-transposable-element	0.108806	0.112546
FBgn0015279	0.314347	0.323794
FBgn0038149	0.0304586	0.0516853
FBgn0039233	0.0314701	0.0395239
FBgn0000015	0.0167186	0.0159518
FBgn0039622	0.0110541	0.00411578
FBgn0261550	1.41434	1.25961
FBgn0037382	0.0889128	0.0964358
FBgn0037573	0.136142	0.139044
FBti0019414	0.0647714	0.0895329
FBgn0016691	0.788759	0.64561
FBgn0051191	0.357966	0.380486
FBgn0038343	0.0683403	0.0183659
FBgn0264694	0.197494	0.134215
FBgn0083985	0.013869	0.0264271
FBgn0039023	0.0489286	0.0216897
FBgn0263979	0.115133	0.173777
FBgn0038037	0.136674	0.160653
FBgn0039554	0.185858	0.145594
FBgn0038071	0.0257992	0.0142972
FBgn0027539	0.0934377	0.115128
FBgn0051221	3.10049	3.23616
FBgn0002921	3.68721	3.75713
FBgn0267764	0.0554035	0.02787
FBti0019445	0.00429969	0.0034221
FBgn0039711	0.0330879	0.0486865
FBgn0001215	1.36674	1.24492
FBgn0265351	0.00530377	0.0229546
FBgn0038268	0.123006	0.109785
FBgn0037698	2.17216	1.97039
FBgn0039299	0.00487903	0
FBgn0027608	1.40429	1.50983
FBgn0025808	0.0606722	0.0363281
FBgn0038981	0.00821622	0.00598489
FBgn0039338	0.672543	0.571839
FBgn0285955	0.0978897	0.127484
FBgn0261995	0.193158	0.187129
FBgn0038716	0	0.000769702
FBgn0039538	0.0389103	0.0498097
FBgn0039360	0.0871543	0.0943554
FBgn0026314	0.0377601	0.00854559
FBgn0264902	0.00713815	0.00930046
FBgn0038092	0.457428	0.348295
FBgn0011474	0.383388	0.480334
FBgn0261649	0.841153	0.711286
FBgn0037537	0.0537073	0.0174568
FBgn0038975	2.3946	2.1981
FBti0059740	0	0.00146113
FBgn0039163	0.125417	0.116294
FBgn0003257	0.0332434	0.0401876
FBgn0263390	0.0309946	0.0122503
FBgn0061476	0.0126075	0.00368027
FBgn0267233	0.0137539	0.0112693
FBgn0038330	0.286571	0.218806
FBgn0267443	0.0112301	0.00376999
FBgn0267781	0.0146427	0.00751077
FBgn0260463	0.00491482	0.00402471
FBgn0039396	0.236123	0.180891
FBgn0051523	0.262588	0.278302
FBgn0044826	0.600239	0.643195
FBgn0037981	0.0868629	0.0901479
FBgn0037433	0	0.00283472
FBgn0039562	0.428112	0.273105
FBgn0040259	0.0462287	0.00948364
FBgn0039836	0.0140487	0.0223136
FBgn0019624	0.746056	0.847211
FBgn0038849	0.00930627	0.00885426
FBgn0037338	0.0699402	0.0590131
FBgn0028688	0.102106	0.106832
FBgn0038144	0	0.00240312
FBgn0283468	0.57654	0.548344
FBgn0039802	0.183426	0.190679
FBgn0287225	0.128906	0.127802
FBgn0040493	0.095482	0.0756811
FBti0059798	0.040088	0.0595401
FBgn0016685	0.25941	0.279027
FBgn0039136	0.113558	0.287947
FBgn0037446	0.253859	0.295773
FBgn0038721	0.230658	0.171363
FBgn0011672	0.199691	0.203449
FBti0019422	0.162516	0.406724
FBgn0039697	0.214906	0.155118
FBgn0027518	0.060179	0.0516576
FBgn0037873	0.516618	0.45873
FBgn0039713	1.90757	1.52894
FBgn0039602	0.371777	0.342868
FBgn0039067	0.107926	0.0570585
FBgn0039589	0.0977202	0.12584
FBgn0037760	0.663359	0.751503
FBgn0039118	0.0143544	0.0223515
FBgn0038063	1.63887	1.55626
FBgn0039349	0.437502	0.539255
FBgn0039483	0	0.000602426
FBgn0037896	0.0146972	0.000529208
FBgn0267799	0.00814637	0.00289602
FBgn0038569	0.0961797	0.121244
FBgn0013813	0.0084643	0.0148494
FBgn0038546	0.229329	0.254492
FBgn0037621	0.0906375	0.125098
FBgn0002937	0.0394463	0.0904798
FBgn0003169	0.477324	0.486863
FBgn0004897	0.00306523	0.00162389
FBgn0037780	0.220229	0.18468
FBgn0262582	1.98239	1.98496
FBgn0038741	0.0217036	0.0375716
FBgn0051207	0.0134682	0.00158084
FBgn0025879	0.100174	0.187004
FBgn0040253	0.00532104	0.00127553
FBgn0085384	0.878261	0.930416
FBgn0027562	0.000998042	0.000718033
FBgn0039594	0.0237446	0.0225535
FBgn0037324	0.0165091	0.00723395
FBgn0038234	0.128402	0.137702
FBgn0039197	0.0158608	0.000920979
FBgn0019925	0.314689	0.295873
FBgn0037611	0.0276071	0.037611
FBgn0266599	1.04057	1.08385
FBgn0039065	0.285233	0.177857
FBgn0038765	0.0312392	0.019594
FBgn0038584	0.026024	0.0265469
FBgn0039687	0.00294002	0.0192229
FBgn0037885	0.0599358	0.0576524
FBti0019372	0.0206297	0.00246618
FBgn0266268	0.137703	0.150759
FBgn0040623	0.238774	0.137814
FBgn0051176	0.0937068	0.0655894
FBgn0051477	0	0.00336912
FBgn0039204	0.192239	0.165801
FBgn0038179	0	0.00101818
FBgn0038588	0.0735136	0.108604
FBgn0037574	0.0697957	0.0653489
FBgn0038878	0.00399973	0.0132961
FBgn0026576	0.317222	0.204031
FBgn0266916	0.106989	0.140451
FBgn0039305	0.0787857	0.0885601
FBgn0038014	0.00136234	0.0116894
FBgn0250910	0.856645	0.808499
FBgn0265274	0.131103	0.167324
FBgn0263413	1.7537	1.3764
FBgn0037618	0	0
FBgn0038156	0.8182	0.737537
FBgn0267766	0	0.00537766
FBgn0026417	0.0196528	0.0282716
FBgn0038028	0.00135786	0.00209601
FBgn0001197	0.468729	0.464823
FBgn0013278	0.394355	0.435661
FBgn0039376	0	0
FBgn0024558	0.0916966	0.0687605
FBgn0039875	0.363179	0.302857
FBgn0037556	0.362338	0.373119
FBgn0041707	1.6699	1.82817
FBgn0037225	0.126754	0.0852213
FBgn0004510	0.0721338	0.0943924
FBgn0051140	2.03263	1.94568
FBgn0266697	0.00897607	0.00884626
FBgn0025571	0.673084	0.585486
FBti0062854	0	0.004924
FBgn0039347	0.588421	0.418521
FBgn0086704	0.0192512	0.026774
FBgn0037391	0.583205	0.458963
FBgn0038829	0.464497	0.283709
FBgn0000454	0.0899918	0.0864495
FBgn0039348	0.259399	0.192271
RR48349-transposable-element	0.0905221	0.0289282
FBgn0037215	0.0668426	0.0338796
FBgn0037538	0.0494973	0.0551159
FBti0020385	0.0113778	0.0271918
FBgn0037999	0.00661481	0.00758857
FBgn0027657	0.403728	0.312705
FBgn0038909	0.0228333	0.0162067
FBgn0038127	0.0364241	0.018599
FBgn0053207	0.565859	0.521476
FBgn0039467	0.00410727	0.0143932
FBgn0267661	0.00141317	0
FBgn0020912	0.0480883	0.0782329
FBgn0004606	0.387216	0.330526
FBgn0038771	0.112954	0.0759978
FBgn0037992	0.0127114	0.00860698
FBgn0037671	0.881582	0.729534
FBgn0051345	0.156718	0.18926
FBgn0037661	0.00279282	0
FBgn0038673	0.0276209	0.0317583
FBgn0037548	0.0364032	0.0110775
FBgn0037506	0.0551789	0.0291924
FBgn0028837	0.063739	0.116655
FBgn0260794	1.15874	1.14393
FBgn0266464	0.325017	0.18032
FBgn0037622	0.11814	0.0831746
FBti0019458	0.0142923	0.0247981
FBgn0037798	0.166074	0.142051
FBgn0039151	0.0433352	0.00211857
FBgn0086472	1.82421	1.92149
FBgn0082831	0.602304	0.41522
FBgn0040608	0.000325548	0.00189712
FBgn0043457	0.118437	0.126687
FBgn0039740	0.0393553	0.0459924
FBgn0038617	0.133672	0.109434
FBgn0037845	0.0152875	0.00168074
FBgn0270928	1.68653	1.84547
FBgn0038397	0.00776797	0.00170402
FBgn0038365	0	0.00714777
FBgn0037749	0.105324	0.10227
FBgn0285911	0.131735	0.159377
FBgn0037290	0	0.0155039
FBgn0002626	1.7796	1.70916
FBgn0040227	0.361447	0.247955
FBgn0038447	0	0.00567653
FBgn0038438	0.105935	0.0963666
FBgn0039068	0.034605	0.0273947
FBgn0046225	0.116802	0.174967
FBgn0024289	0.0542524	0.0138967
FBgn0015625	0.0129166	0.0190199
RR46410-transposable-element	0.0135164	0.0141505
FBgn0038601	0.0320164	0.0568204
FBgn0038271	0.985659	0.954471
FBgn0015737	0.26331	0.183475
FBgn0027524	0.0514679	0.0583161
FBgn0003507	0.00491506	0.00473058
FBgn0042106	0.00639517	0.000467155
FBgn0039471	0	0
FBti0020298	0.200006	0.110302
FBgn0003525	0.133784	0.0140886
FBgn0015229	1.08452	1.34659
FBgn0283499	1.07381	1.1358
FBgn0039490	0.00261584	0
FBgn0037384	0.141306	0.137273
FBgn0265082	1.87627	1.85806
FBti0019350	0.0179138	0.0166606
FBgn0037239	0.320019	0.262618
FBgn0051313	0.0411809	0.0329274
FBgn0039698	0.153251	0.143675
FBgn0037553	0.094264	0.00175884
FBgn0038173	0.0101442	0.0230666
FBgn0265419	0.00188831	0.0066096
FBti0019326	0.0208206	0.029661
FBgn0051125	0.072332	0.0640072
FBgn0039829	0.379012	0.325377
FBgn0010328	0.646785	0.578432
FBgn0038515	0.350783	0.470178
FBgn0039776	0.37657	0.326878
FBgn0019957	0.522588	0.448837
FBgn0000150	0.741405	0.674455
FBgn0038047	0	0.00685444
FBgn0002645	0.778961	0.851977
FBgn0004436	0.764662	0.834099
FBgn0069242	0.283336	0.242275
FBgn0083946	0.00399222	0.0171247
FBgn0038381	0.0152421	0.00831859
FBgn0051373	0.00205775	0.00584288
FBgn0044823	0.0726102	0.08273
FBgn0053108	0.066827	0.0581792
FBgn0051174	0.0109782	0.0158883
FBgn0267810	0.0199783	0.0161682
FBgn0001280	0.109034	0.144126
FBgn0016917	0.953157	0.929348
FBgn0039339	0.00254489	0.0213417
FBgn0038038	0.0673764	0.00471293
FBgn0267953	0.0090045	0.00455538
FBti0019282	0.00545433	0
FBgn0039040	0.0128999	0
FBgn0038250	0.183102	0.0197742
FBgn0038056	0.0590992	0.0864187
FBti0019425	0.010435	0.00904329
FBgn0004118	0.79421	0.794653
FBgn0026190	0	0.00170402
FBgn0003889	0.0104077	0.0240646
FBgn0051550	0.776511	0.603049
FBti0062420	0.211759	0.097367
FBgn0027865	0.570136	0.574932
RR48326-transposable-element	0.181086	0.532197
FBgn0286507	0.0141804	0.00737034
FBgn0037672	0.109611	0.14397
FBgn0038846	0	0
FBgn0038371	0.00176873	0.00770013
FBgn0039544	0.369664	0.341861
FBgn0263750	0.0245149	0.0104444
FBgn0039846	0.0173611	0.0348999
FBgn0010247	1.78144	1.51897
FBgn0261380	0.178629	0.125013
FBgn0037762	0.0196512	0.00358941
FBgn0040588	0.00170151	0
FBgn0051436	0.01133	0.0123634
FBgn0037703	0.152491	0.125886
FBgn0040208	0.17529	0.205996
FBti0059724	0	0
FBti0019390	0.00862878	0.00992743
FBgn0039252	0.143532	0.102973
FBti0019384	0.0829262	0.0821089
RR48318-transposable-element	0.148206	0.0881623
FBgn0038654	0.00631338	0.00271679
FBti0019393	0.00218404	0
FBgn0004369	2.09124	2.05962
FBti0019364	0.0155429	0.0252946
FBgn0014869	0.697824	0.810849
FBgn0262167	0.0844615	0.10647
FBgn0051460	0.0633991	0.0402334
FBgn0002632	0.0330309	0.00504897
FBgn0039145	0.0113438	0.00436365
FBti0019376	0	0.000985545
FBgn0037978	0.113278	0.12843
FBgn0037359	0.0705157	0.066159
FBgn0038211	0.166476	0.0347016
FBgn0039488	0.188722	0.162155
FBgn0039234	0.238711	0.140447
FBgn0039747	0.0411816	0.0438622
FBgn0038202	0.363538	0.265565
FBgn0038597	0.0415115	0.05075
FBgn0038237	1.43966	1.29004
FBgn0010113	2.40083	2.20501
FBgn0039743	0.195586	0.251941
FBgn0038083	0.0239986	0.00222507
FBgn0038972	0.0140063	0.0237606
FBgn0027620	0.507158	0.525946
FBgn0039170	0.01538	0.0190068
FBgn0039759	0.00361617	0
FBgn0051467	0.0225578	0.0170598
FBgn0002441	0.338685	0.282715
FBgn0014141	0.0486227	0.0488712
FBgn0038251	0.153274	0.196433
FBti0061829	0.00743664	0.00186467
FBgn0025457	0.132162	0.0848288
FBgn0037653	0.133088	0.106998
FBgn0038261	0.00157192	0.00121565
FBgn0039593	0.0260894	0.00195059
FBgn0039321	0.0723209	0.0532289
FBgn0266227	0.871156	0.523717
FBgn0051198	0.0124172	0.0012592
FBgn0039645	0	0
FBgn0039187	0.615793	0.52165
FBgn0037304	0.0575894	0.0431892
FBgn0037913	0.435986	0.495895
FBgn0261552	3.15274	3.22276
FBgn0038897	0.0830784	0.00527373
FBgn0037836	0	0.0195898
FBgn0266581	0.141801	0.141017
FBgn0037856	0.179692	0.142526
FBgn0038947	0.568479	0.617846
FBgn0039849	0.0832133	0.0559798
FBgn0016123	0.0106098	0.0272462
FBgn0038318	0.277846	0.243612
FBgn0039559	0.107247	0.12357
FBgn0264426	0	0.00441298
FBgn0037370	0.0402379	0.0239799
FBgn0037835	0.0598123	0.0189365
FBgn0027493	0.377856	0.392879
FBgn0261053	0.00304858	0.00497728
FBgn0037801	0.00249866	0.0128103
FBgn0051451	4.27726	4.91642
FBgn0038256	0.0353742	0.0485588
FBgn0038549	0.414794	0.393536
FBgn0004087	0.00286652	0.0238976
FBgn0037472	0.231647	0.21876
FBgn0260962	0.184173	0.197373
FBgn0037684	0.00298191	0.00782859
FBgn0038722	0.0774526	0.0537269
FBgn0261356	0.00772742	0.000668862
FBgn0051475	0.336961	0.424881
FBgn0039738	0.704979	0.673282
FBgn0039381	0.460359	0.45826
FBgn0037250	0.118067	0.118436
FBgn0051155	0.0674369	0.0499929
FBgn0027526	0.0962041	0.131164
FBgn0039271	0.0709766	0.0376448
FBgn0037607	0.343246	0.126424
FBgn0037550	0.0753274	0.0498235
FBgn0038693	1.90181	1.79901
FBgn0038877	0.324165	0.576056
FBgn0039766	0.071588	0.0704008
FBgn0038106	0.057547	0.10384
FBgn0003275	0.267191	0.332416
FBgn0038045	0.00520522	0.00371447
FBgn0037408	0.195235	0.173363
FBgn0038407	0.0544726	0.0198009
FBgn0039644	0.216297	0.175065
FBgn0037819	0.0244973	0.0734089
FBgn0037235	0.0296937	0.0242237
FBgn0038923	0.106734	0.0947738
FBgn0037843	0.185378	0.183119
FBgn0053208	1.01416	0.953845
FBgn0087012	0.581554	0.654751
FBgn0051547	0.0336879	0.0293971
FBgn0040575	0.0827811	0.108483
FBgn0039154	0.00666345	0.00978354
FBgn0038805	0.104036	0.102042
FBgn0051301	0.0997244	0.100407
FBgn0260722	0.449545	0.501905
FBgn0262538	0	0
FBgn0038198	0.0270204	0.00452434
FBgn0039296	0.129614	0.0868604
FBgn0039344	0	0.0133185
FBgn0038435	0.0319269	0.0424038
FBgn0037683	0	0.00878338
FBgn0037371	0.0748876	0.0548417
FBgn0037345	0.0469852	0.01855
FBgn0037614	0.212265	0.237354
FBgn0037525	2.22983	1.95496
FBgn0038046	0.130893	0.123931
FBgn0038536	0.0230327	0.035852
FBgn0037330	0.166997	0.1139
FBgn0259685	0.162604	0.157928
FBgn0038946	0.0108728	0.00854647
FBgn0037533	0.809333	0.63191
FBgn0037712	0.121935	0.104914
FBti0019423	0	0.000337991
FBgn0038953	0.106512	0.0711058
FBgn0051390	0.135932	0.194202
FBgn0038627	0.097132	0.0679452
FBgn0027583	0.139333	0.116581
FBgn0039632	0.124588	0.158708
FBgn0037442	0.748715	0.804281
FBgn0004103	0.638563	0.71786
FBgn0039702	0.0785826	0.0276522
FBgn0026059	0.927433	0.900373
FBgn0039683	0.0666166	0.0614274
FBgn0046756	0.0147949	0.000746918
FBgn0039125	0.00963797	0.0135496
FBgn0038467	0.0795509	0.0183909
FBgn0010926	0.184431	0.197834
FBgn0038387	0.144809	0.131294
FBgn0037244	0.24799	0.207247
FBgn0037979	0.224202	0.237827
FBgn0038225	0	0.00294694
FBgn0015591	0.0216157	0.0210902
FBgn0037613	0.0452722	0.0666795
FBgn0051262	0.00352799	0.00383948
FBgn0040528	0.0973411	0.0123147
FBgn0051183	0.202349	0.1259
FBgn0014029	0.280878	0.229854
FBgn0013949	0.406219	0.130202
FBgn0037504	0.109787	0.1397
FBgn0037941	0.493224	0.518651
FBgn0267758	0	0.00365642
FBgn0267562	0.0261952	0.0149908
FBgn0023179	1.49214	1.46916
FBgn0051104	0	0.00214629
FBgn0046258	0.00730013	0.0052216
FBgn0038095	0.157051	0.0133281
FBgn0038723	0.171679	0.125502
FBgn0022359	0.115474	0.0249512
RR48350-transposable-element	0.0554588	0.0328829
FBgn0051251	0.0679073	0.0347231
FBgn0039113	0.0932685	0.0731926
FBgn0038277	0.00110254	0.00452434
FBgn0262473	0.799337	0.859412
FBgn0259222	1.29584	1.05718
FBgn0016120	1.09192	0.952838
FBgn0037853	0.0201003	0.00224419
FBgn0262974	0.00208899	0.0107539
FBgn0038606	0.593225	0.624905
FBgn0039869	0.0991175	0.146899
FBgn0026565	0	0.00559964
FBgn0037723	0.159704	0.145906
FBgn0264741	0.0139175	0
FBgn0266698	0.0380323	0.00605643
FBgn0265041	0.0382041	0.0216076
FBgn0038426	0.298207	0.293322
FBgn0037719	0.0774848	0.0782282
FBgn0038002	0.00612406	0.00336246
FBgn0027508	0.346291	0.257806
FBgn0003205	0.778845	0.780704
FBgn0002772	0.0138195	0.0105607
FBgn0027497	0.231439	0.275398
FBgn0039454	0	0.00084578
FBgn0038471	0.052663	0.0846464
FBti0019430	0.0704877	0.0757247
FBgn0051144	0	0.00288796
FBgn0024833	0.245127	0.248985
FBgn0014879	0.146171	0.148163
FBgn0039420	0.66982	0.699726
FBgn0039210	0.286288	0.277712
FBgn0039055	0.197669	0.187964
FBgn0024330	0.221938	0.283189
FBgn0038590	0.0452386	0.0491635
FBgn0278604	0.0281991	0.0666794
FBgn0024944	0.476565	0.465024
FBgn0261015	0.0238127	0.0359044
FBti0019437	0.00964518	0.00960819
FBgn0039189	0.0214671	0.0227391
FBgn0054041	0.00725249	0.00156078
FBgn0266735	0	0.000542931
FBgn0002868	1.80646	1.58262
FBgn0065098	1.23121	0.913626
FBgn0051352	0.878789	0.777527
FBgn0014135	0.123832	0.0999312
FBti0063293	0.0143253	0.0233913
FBgn0039642	0.0573405	0.0812977
FBgn0265189	0.0345059	0.0392568
FBgn0266719	0.0434535	0.0342125
FBgn0000166	0	0
FBgn0283438	0.321325	0.384173
FBgn0039680	0.00640517	0.00806718
FBgn0051445	0.0802888	0.00111889
FBgn0053329	0.0143293	0.00928078
FBgn0037901	0.038707	0.0383694
FBgn0039664	0.0381673	0.0537537
FBgn0039427	0.184353	0.156659
FBgn0022338	0.0982469	0.0611713
FBgn0285959	0.0254135	0.0166174
FBgn0039056	0.278357	0.279248
FBgn0051370	0.00926397	0.00374982
FBgn0022800	0.0109869	0.00599019
FBgn0267160	0.709825	0.0110488
FBgn0003479	0	0.0524255
FBgn0051300	0.0208517	0.0234211
FBgn0028471	0.517683	0.474441
FBgn0051326	0.264386	0.0555873
FBgn0038110	0.0758706	0.0614956
FBti0019369	0	0.0192271
FBgn0037975	0.00264942	0
FBgn0264495	1.67419	1.64684
FBgn0037726	0.00388675	0.00104577
FBgn0013576	2.70553	2.56075
FBgn0038401	0.107093	0.144247
FBgn0019972	0.0441031	0.0435031
FBgn0264005	0.169	0.142323
FBgn0044511	0.208564	0.229068
FBgn0038087	0.704573	0.571052
FBgn0261393	0.000954209	0.00126406
FBgn0037606	0.201941	0.212926
FBgn0037632	0.1138	0.0777283
FBgn0038054	0.0392858	0.0208572
FBgn0010803	0.0955601	0.0918138
FBgn0037730	0.00520621	0.0023443
FBgn0038565	0.00190575	0.00595071
FBgn0039633	1.55394	1.58926
FBgn0039110	0.0939197	0.0699476
FBti0061925	0.0206446	0.0129962
RR48325-transposable-element	0.0431948	0.0499877
FBgn0003867	0.0203779	0.0158161
FBgn0052944	0.414536	0.328313
FBgn0039558	0.080915	0.0825228
FBgn0004618	0.0216787	0.015086
FBgn0038013	0.0784603	0.0699497
FBgn0066101	1.03163	0.988546
FBgn0039169	0.0977803	0.130559
FBgn0003862	1.56207	1.62381
FBgn0038840	0.0676038	0.0902208
FBgn0259113	0.00319744	0.00168361
FBgn0039580	0.167878	0.223498
FBgn0002783	0.260998	0.239268
FBgn0250746	0.147193	0.129854
RR42049-transposable-element	0.0207223	0.00808203
FBgn0051231	0.0100578	0.00341323
FBgn0015351	0.0392643	0.0336679
FBgn0263662	0.00384264	0.0148884
FBgn0039203	0.135914	0.0202831
FBgn0004587	2.20754	1.99621
FBgn0000039	0.65203	0.567899
FBgn0086346	0.371135	0.277871
FBgn0039013	0.0339388	0.0355605
FBgn0037792	0.116922	0.100199
FBgn0039882	0.183673	0.0987395
FBgn0262614	1.47518	1.38125
FBgn0000416	0.615305	0.582189
FBgn0039451	0.341784	0.309209
FBgn0042213	0.0895583	0.0711614
FBgn0010750	0.201816	0.192004
FBgn0011740	0.145851	0.145655
FBgn0037877	0.20328	0.185378
FBgn0038826	2.44074	2.44502
FBgn0051118	0.370509	0.334581
FBgn0039430	0.392405	0.413173
FBgn0039479	0.0139529	0.0172332
FBgn0038682	0.0113128	0.00829226
FBgn0039084	0	0
FBgn0039675	0	0.00606322
FBgn0038018	0.0051547	0
FBti0062874	0.0118939	0.0189672
FBgn0038929	0.212968	0.216641
FBgn0038950	0.0842316	0.0957356
FBgn0038720	0.0381428	0.0346146
FBgn0051008	0.00202743	0.00568801
FBgn0267239	0	0.00360593
FBgn0003882	0.179059	0.169141
FBgn0039647	1.68294	1.60664
FBgn0001149	0.410506	0.362039
FBgn0083949	2.0497	1.93556
FBgn0267567	0.00359559	0.0038048
FBgn0067783	0.158171	0.184744
FBgn0038400	0.656266	0.571666
FBgn0266248	0.00552362	0.00835949
RR48386-transposable-element	0.0113843	0.024201
FBti0019377	0.0825628	0.0276728
FBgn0038167	0.185794	0.15337
FBgn0038290	0.725104	0.0218824
FBgn0038788	0.224677	0.139703
FBgn0037521	2.13572	2.12096
FBgn0264325	0.0757024	0.109057
FBgn0019960	0.448356	0.360972
FBgn0259244	1.44216	1.35255
FBgn0004509	1.34746	1.33546
FBgn0037710	0.123868	0.08673
FBgn0038542	0.516199	0.529099
FBgn0046247	0.357326	0.380068
FBgn0037831	0.33954	0.319212
FBgn0037465	0.149637	0.114947
FBgn0259736	0.0407937	0.138554
FBgn0037772	0	0.00428778
FBgn0086608	0.00419303	0.00544559
FBgn0038916	0.0158704	0.00158593
FBgn0038767	0.0668009	0.0918389
FBgn0005596	0.138023	0.145467
FBgn0037315	0.228493	0.204376
FBgn0020235	0.821338	0.682068
FBgn0265159	0	0.00405094
FBgn0039158	0.0354521	0.0318785
FBgn0038830	0.164225	0.172576
FBgn0260944	0.965638	0.702174
FBti0019392	0.0121215	0.0096511
FBgn0051439	0.010553	0.0172823
FBgn0039620	0.00810145	0.0055618
FBgn0037937	0.000674497	0.00677689
FBgn0040554	0.00229579	0.00515617
FBgn0085454	0.0576278	0.0392693
FBgn0039266	0.13005	0.219153
FBgn0039639	0.0116545	0.0185261
FBgn0261929	0.224226	0.274801
FBgn0039532	0.291034	0.260685
FBgn0039710	0.141133	0.108608
FBgn0037757	0.161761	0.146591
FBgn0037295	0.410751	0.351949
FBgn0085466	0.00403097	0
FBgn0038876	0.122215	0.134071
FBgn0037899	0.819844	0.853479
FBgn0039867	0.023395	0.0375045
FBgn0053213	0.0495327	0.020207
FBgn0038146	0.0548721	0.053676
FBgn0039625	0.056076	0.0303953
FBti0062423	0.250092	0.167012
FBgn0038880	0.214539	0.178052
FBgn0037754	0.849843	0.90348
FBgn0260005	0.151552	0.212792
FBgn0026250	1.15339	1.31321
FBgn0037660	0.134186	0.141861
FBgn0037878	0.207243	0.223803
FBgn0053547	2.79606	2.60191
FBti0019470	0.0837196	0.0518699
FBgn0037356	0.0855049	0.0695545
FBgn0038738	0.102955	0.0733696
FBgn0038816	0.16712	0.162497
FBgn0004908	0.0960946	0.121843
FBgn0263740	0.146312	0.132789
FBgn0038474	0.214105	0.131561
FBti0019463	0.0247634	0.0168933
FBgn0259704	0.0619931	0.0430654
FBgn0005659	0	0.00504715
FBgn0015019	0.307633	0.247423
FBgn0265067	0.0288514	0.0163394
FBgn0263351	0.194317	0.215488
FBgn0051374	0.0458082	0.0626876
FBgn0267757	0.0905269	0.0621817
FBgn0000083	0.35957	0.301408
FBgn0039214	0.796526	0.760123
FBgn0262869	1.84029	1.76381
FBgn0011481	1.29373	1.45078
FBgn0038463	0.0629241	0.0315284
FBgn0010772	1.87276	1.77211
FBgn0038180	0.00586619	0.00203092
FBgn0037427	0.00359559	0.00977237
FBgn0004666	0.015491	0.0365445
FBgn0037341	0.147102	0.122714
FBgn0037841	0.0248609	0.0236976
FBti0019435	0.0136635	0.0176039
FBgn0014380	0.018794	0.0123575
FBgn0011666	2.04291	2.1138
FBgn0263650	0.0363007	0.0802509
FBgn0266745	0.00375186	0.00538314
FBgn0038735	0.324472	0.420351
FBgn0039356	0.0378377	0.0489423
FBgn0038917	0.0283209	0.0227281
FBgn0267698	1.03958	0.970774
FBgn0037583	0.0185329	0.0182952
FBgn0038446	0.174138	0.171529
FBgn0262955	0.162337	0.224003
FBgn0038429	0.087751	0.0468778
FBgn0040524	0	0.000896643
FBgn0014018	0.166999	0.127812
FBgn0039629	0.0412601	0.0173746
FBgn0037875	0.0745604	0.104637
FBgn0266673	0.149455	0.127217
RR48319-transposable-element	0.137215	0.407602
FBgn0026380	0.150372	0.107614
FBgn0037483	0.0522255	0.0462212
FBgn0004898	0.00412184	0.00521375
FBgn0038787	0.447418	0.437733
FBgn0051457	0.055063	0.0595335
FBgn0037619	0.0476934	0.0372143
FBgn0039117	0.0731986	0.0496599
FBgn0086370	0.375115	0.363367
FBgn0037750	0.00801492	0.00982201
FBgn0038205	0.0228231	0.0280689
FBti0020307	0.157233	0.13095
FBgn0010877	0.482757	0.553418
FBti0019409	0	0.001731
FBgn0263408	0.00736877	0.00715103
FBgn0266668	0.114835	0.130547
FBgn0039407	0.00363896	0.011104
FBgn0039489	0.046839	0.0519283
FBgn0037609	0.136798	0.152287
FBgn0037796	0.0142459	0.0165496
FBgn0000504	0.0438729	0.0427764
FBgn0260793	1.19996	1.10639
FBgn0039066	0.372715	0.426412
FBgn0038974	0.0478734	0.0752763
FBgn0037637	1.29235	1.27527
FBgn0039688	0.519328	0.509217
FBgn0051549	0.101567	0.118882
FBgn0051278	0.0230004	0.0403161
FBgn0039504	0	0.00129739
FBgn0000659	0.682886	0.672492
FBgn0038349	0.0133498	0.00267432
FBgn0038129	0.10715	0.112361
FBgn0038766	0.0241304	0.0235108
FBgn0038868	0.176312	0.0933712
FBgn0015778	1.4742	1.53089
FBgn0051103	0.00448662	0
FBgn0046214	0.27637	0.262041
FBgn0046696	0.151832	0.109572
FBgn0039355	0.026948	0.0257874
FBti0061892	0.00367901	0.00204802
FBgn0051324	1.40029	1.33558
FBgn0037454	0.368119	0.25256
FBgn0039257	0.385184	0.326875
FBgn0267551	0.0318824	0.0308795
FBgn0011715	0.177419	0.159071
FBgn0037716	0.312286	0.300319
FBgn0028708	0.0912172	0.0603406
FBgn0038890	0.494849	0.474688
FBgn0037648	0.112149	0.114423
FBgn0037569	0.0258356	0.0251666
FBgn0067628	0.0424442	0.0485262
FBgn0039402	0.121096	0.122273
FBgn0039156	0.0831603	0.0842067
FBgn0024958	0.162579	0.128475
FBgn0004359	0.00614001	0.0085331
FBgn0243514	0.0155447	0.00128385
FBgn0037707	0.13954	0.173732
FBgn0039566	0.0923433	0.130226
FBgn0024222	0.00417339	0.00981172
RR48336-transposable-element	0.0282414	0.0101857
FBgn0003499	1.3675	1.34797
FBgn0037561	0.0708932	0.0303628
FBgn0039102	0.0496098	0.00547628
FBgn0038683	0.22909	0.228575
FBgn0038420	0.0260581	0.0652617
FBgn0039111	0.0562105	0.0674294
FBti0062083	0.0121376	0.013885
FBgn0039137	0.11022	0.0832108
FBgn0011581	0.12348	0.220972
FBgn0260741	0.0275704	0.0621319
FBgn0039120	0.334503	0.27679
FBgn0262577	0.00772621	0.00283922
FBgn0051453	0.058551	0.0558883
FBgn0260003	1.24066	1.21238
FBgn0086378	0.545623	0.580095
FBgn0038810	0.144171	0.113403
FBti0020321	0.000308655	0.00609402
FBgn0039449	0.0258391	0.0439238
FBgn0038672	0.0907686	0.0979195
FBgn0037470	0.242889	0.241917
FBti0061704	0.0260243	0.00250318
FBgn0028476	0.468977	0.495441
FBgn0261285	1.00806	1.14176
FBgn0020496	1.96623	1.93456
FBgn0039581	1.34809	1.20303
FBgn0039528	0.809679	0.897228
FBgn0011336	0.147442	0.111632
FBgn0037552	0.0203365	0
FBgn0046222	0.158118	0.0837773
FBgn0039689	0.0714534	0.0502366
FBgn0037581	0.0707063	0.0764324
FBgn0029503	0.0758321	0.0612879
FBgn0016061	2.05698	1.96675
FBgn0027930	0.234213	0.0319332
FBgn0051363	1.10448	1.03007
FBgn0267730	0	0.00551437
FBgn0262975	0.673766	0.64589
FBgn0267711	0.000429189	0.00189801
FBgn0039165	0.0567195	0.0491275
FBti0019440	0.0060675	0.0084092
FBgn0262540	0.003786	0.00328934
FBgn0038551	0.149295	0.149679
FBgn0024841	0.187278	0.247278
FBti0059762	0.00798794	0.0192909
FBgn0267748	0	0.00405307
FBgn0053512	0.844418	0.847339
FBgn0260940	0.0548038	0.0874883
FBgn0262105	0	0.00522166
FBgn0037880	0.106072	0.0484677
FBgn0000064	1.57949	1.73242
FBgn0267790	0.680803	0.613529
FBgn0037874	1.18567	1.17128
FBgn0039623	0.221592	0.211483
FBgn0267780	0.00179005	0.00637525
FBgn0042094	0.166192	0.114523
FBgn0051098	0.223048	0.190316
FBgn0038488	0.26063	0.347272
FBti0019343	0.00247174	0
FBgn0037372	0.0594094	0.0833909
FBgn0011476	0.176181	0.185786
FBgn0038928	0.0198858	0.0297964
FBgn0020910	1.82026	1.47957
FBgn0037612	0.031415	0.0296546
FBgn0027578	0.148232	0.0271166
FBgn0267203	0	0.00237413
FBgn0038746	0.225452	0.262088
FBgn0038260	0.00881728	0.00300918
FBgn0263620	0.0125541	0.0302212
FBgn0011596	0.0226624	0.0295787
FBgn0039126	0.096831	0.119446
FBgn0263768	0.0662097	0.0754276
FBgn0266409	0.991996	1.09063
FBgn0001138	0.236373	0.266371
FBgn0085315	0.00114536	0.000997533
FBgn0037633	0.0547125	0.0574909
FBgn0028396	0.15258	0.0128873
FBgn0051431	0.00219799	0.00204802
FBti0020297	0.0833993	0.0634121
FBgn0263929	1.02716	1.02755
FBgn0038269	0.189859	0.123378
FBgn0040238	0.286018	0.28113
FBgn0039306	0.0643308	0.0923395
FBgn0053094	0.461751	0.46639
FBgn0037344	1.06083	0.9695
FBgn0265379	0.191752	0.19681
FBgn0037261	0.879255	0.832373
FBgn0039312	0.0574148	0.138205
FBgn0037755	0.231967	0.298493
FBgn0037918	0.289143	0.285741
FBgn0039801	0.0146843	0.0330205
FBgn0267431	0.902838	0.630673
FBgn0263499	0.00589385	0.002234
FBgn0039030	0.0621775	0.0257792
FBgn0266721	0.236257	0.257875
FBgn0037248	0.183376	0.16702
FBgn0038449	0.00182972	0.000891767
FBgn0267787	0.0268676	0.00844626
FBgn0014863	0.403448	0.297346
FBgn0039774	0.103005	0.149111
FBgn0029512	0.09561	0.0798859
FBgn0264357	1.17142	1.13142
FBgn0002622	1.66992	1.52687
FBti0020302	0.000529358	0
FBgn0051233	0.00766176	0.00355244
FBgn0039782	0.00217254	0.00291552
FBgn0039464	0.426214	0.469638
FBgn0037944	0.256234	0.300747
FBgn0039213	0.258937	0.323195
FBgn0038099	0	0
FBti0062387	0.00238052	0
FBgn0037513	0.0373479	0.0317274
FBti0019347	0.0555691	0.0308131
FBgn0038922	0.872271	0.803328
FBgn0051100	0.0134681	0.0151039
FBgn0264916	0.0204705	0.0417139
FBgn0051360	0.199949	0.158858
FBgn0037759	0.00775601	0.0101042
FBgn0039225	0.0142086	0.0223192
FBgn0037325	0.00768333	0.0104766
FBgn0037578	0.0768338	0.0700237
FBgn0263663	0.00921559	0.0198965
FBgn0039112	0.455275	0.483484
FBgn0037976	0.16755	0.166866
FBgn0037935	0.00204348	0.00370574
FBgn0024963	3.04649	2.67244
FBgn0038704	0.45481	0.404555
RR42085-transposable-element	0.0174173	0.0124192
FBgn0020510	0.193417	0.197665
FBgn0039723	0.0869222	0.158214
FBgn0025802	0.302441	0.273268
FBgn0051244	0.00620266	0.0110911
FBgn0039735	0.15581	0.16947
FBgn0038462	0.0970226	0.056931
FBgn0037635	0.153701	0.150079
FBti0019374	0.0384991	0.0066773
FBgn0038300	0.0855349	0.070875
FBti0019302	0.0463072	0.0223551
FBgn0001296	0.126172	0.0291906
FBgn0039218	0.20612	0.193409
FBgn0039140	0.402691	0.32491
FBgn0011020	0.0562449	0.0526246
FBgn0286035	0.00616544	0.00480692
FBgn0038168	0.148254	0.21101
FBgn0026400	0.0986292	0.119195
FBti0019333	0.00162386	0.00546739
FBgn0038424	0.198022	0.231171
FBgn0038842	0.00593796	0.00946712
FBgn0003886	0.00399973	0.000838859
RR48374-transposable-element	0.0372198	0.0179495
FBti0019416	0.0193523	0.0241408
FBgn0046763	0.0125403	0.0230765
FBgn0083943	0.00502821	0.00223812
FBgn0037949	0.655909	0.79705
FBgn0038837	0.308367	0.451088
FBti0019401	0.020952	0.0122868
FBgn0037435	0.0795894	0.0584155
FBgn0027951	0.615269	0.629251
FBgn0261599	1.89898	1.87072
FBgn0025865	0.160342	0.185894
FBgn0038595	0	0.00576349
FBgn0286516	3.18401	3.25766
FBgn0051472	0.125975	0.122153
FBgn0037763	0.0156297	0.00536507
FBgn0002906	0.242765	0.231244
FBgn0039130	0.0345768	0.0408064
FBgn0266720	0.36333	0.544411
FBgn0267975	1.07432	0.989402
FBgn0038299	0.229396	0.0560144
FBgn0267157	0.00218404	0.0165562
FBgn0039595	0.00507762	0.010658
FBgn0027090	0.120841	0.0753267
FBgn0038924	0.106103	0.059717
FBgn0039417	0.0521482	0.0726214
FBgn0037445	0.291361	0.337498
FBgn0037240	0.283385	0.250069
FBgn0039081	0.199439	0.239684
FBgn0038858	0.0602785	0.112004
FBgn0038491	0.159363	0.171709
FBgn0037770	0.0781861	0.113037
FBgn0266414	1.85071	1.6349
FBgn0014022	0.152021	0.127815
FBgn0264907	0.407628	0.386278
FBgn0037236	0.00242527	0.0143924
FBgn0037647	0.116686	0.0976731
FBti0019428	0.00407757	0.00511296
FBgn0003011	0.125397	0.170445
FBgn0051481	0.0769036	0.0888486
FBgn0003137	0.0758456	0.0245033
FBgn0039132	0.539402	0.570586
FBgn0037608	0.138663	0.106096
FBgn0039419	0.345291	0.257928
FBgn0039808	0.989129	0.875818
FBgn0086679	0.140412	0.170321
FBgn0013279	1.19946	1.11239
FBgn0263289	1.3131	1.13712
FBgn0039149	0.790461	0.788123
FBgn0051109	0.144626	0.166627
FBgn0011774	0.0871445	0.0728773
RR48347-transposable-element	0.273763	0.151318
FBgn0259146	0.421399	0.413192
FBgn0025574	0.757307	0.631
FBgn0038516	0.0316311	0.00433147
FBgn0039712	0.204307	0.156169
FBgn0038769	0.0401505	0.0134953
FBgn0038930	0.0353736	0.0245204
FBgn0037765	0.0157296	0.00521806
FBti0019367	0.0365703	0.0181815
FBgn0028436	0.0692535	0.0555764
FBgn0020278	0.0237851	0.047896
FBgn0039857	1.75604	1.50269
FBgn0261988	1.63637	1.42884
FBgn0037838	0.0607046	0.0449515
FBgn0038432	0.206778	0.140305
FBgn0039863	0.46512	0.418084
FBgn0250757	0.0684097	0.0991264
FBgn0038088	0.063285	0.081505
FBgn0038235	0.0929689	0.0949847
FBgn0003134	0.998125	1.0549
FBgn0029157	0.3429	0.331592
FBgn0039124	0.00302807	0.00771068
FBgn0087005	0.0628523	0.0370269
FBgn0027654	1.31769	1.41179
FBgn0037676	0.803356	1.00285
FBgn0039492	0.68396	0.665422
FBgn0283536	1.31928	1.49866
FBgn0002431	0.644	0.670378
FBgn0262741	0.130903	0.162554
FBgn0038533	0.170646	0.163704
FBgn0040071	1.00903	1.04501
FBgn0043900	0.404671	0.335447
FBgn0014006	0.21369	0.212278
FBgn0037920	0.0963193	0.11382
FBgn0037336	0.89851	0.842121
FBgn0028984	0.0453441	0.0562901
FBgn0051414	0.0529367	0.00638589
FBgn0039770	0.289639	0.332435
FBgn0010389	0.0182893	0.0612834
FBgn0028833	0.452247	0.467727
FBgn0051538	0.165135	0.125075
FBgn0039336	0.0413701	0.0322381
FBgn0263048	0.266555	0.174306
FBgn0051004	0	0.00461939
FBgn0004622	0.190515	0.163496
FBgn0265426	0.00977576	0
FBgn0028671	1.17058	1.17397
FBgn0038964	0.266268	0.240559
FBgn0015622	0.750318	0.703516
FBgn0038552	0.230925	0.0941026
FBgn0037826	0.0124393	0.00313498
FBgn0051064	0.522317	0.531144
FBgn0039651	0	0.000934092
FBti0019402	0.0285135	0.0174801
FBgn0037855	0.512776	0.402635
FBgn0264493	1.22866	1.2127
FBgn0039283	0.175277	0.135993
FBgn0051344	0.195636	0.127491
FBgn0024912	0.0878103	0.133708
FBgn0038389	0.162291	0.180136
FBgn0262125	0.264464	0.249825
FBgn0263490	0.39235	0.411136
FBgn0263414	0	0.0121849
FBgn0264826	0	0.00581431
FBti0059775	0.00243385	0.00978851
FBgn0044810	0.017314	0.000975772
FBgn0082582	0.636204	0.704152
FBgn0020299	0.0426695	0.154753
FBgn0037490	0.0354249	0.0156158
FBti0019301	0.00569045	0.00223111
FBgn0039094	0.0260619	0.00468561
FBgn0010774	0.632258	0.643529
FBgn0264324	0.455386	0.520524
FBgn0028670	0.0228451	0.0104893
FBgn0039006	0.00148378	0.00277341
FBgn0037332	0.419667	0.374202
FBgn0039691	0.0845584	0.0773774
FBgn0037232	0.323644	0.291149
FBgn0037667	0.0118665	0.0165649
FBgn0023023	0.817292	0.645117
FBti0061797	0.00542169	0.00851566
FBgn0038862	0.222227	0.231839
FBgn0047114	0.0647624	0.0456465
FBgn0005355	0.0931351	0.0822299
FBgn0039150	0.13197	0.101549
FBgn0027512	0.408893	0.359955
FBgn0039153	0.156779	0.106627
FBgn0038679	0.186877	0.458618
FBgn0038581	0.089577	0.105533
FBgn0027655	0.610525	0.547249
FBgn0013953	0	0
FBgn0285937	0.678037	0.773599
FBgn0038258	0	0.00638766
FBgn0004885	0.591668	0.515884
FBgn0053110	0	0
FBgn0038510	0.00634608	0.0210281
FBgn0037644	0.0842184	0.0890405
FBgn0039155	0	0
FBgn0039183	0.0763344	0.0553916
FBgn0017577	0	0.00300914
FBgn0038811	0.0378086	0.031997
FBgn0267201	0.0204269	0.00631321
FBgn0024509	0.217232	0.210799
FBgn0053098	0.0071236	0.00563761
FBgn0051102	0.00445755	0.00832008
FBgn0010038	0.00667476	0.00072119
FBgn0038660	0.0058078	0.018521
FBgn0262146	0.0195223	0.0290935
FBgn0037535	0.0669479	0.0940655
RR48337-transposable-element	0	0.00368413
FBgn0015011	0	0
FBgn0051368	0.13781	0.151746
FBgn0039329	0.109445	0.104981
FBgn0037617	0.0518274	0.0655224
FBgn0039663	0.0114356	0.04117
FBgn0000024	2.24	2.00384
FBti0059666	0.422513	0.347961
FBgn0045866	0.34532	0.281556
FBgn0038053	0.326705	0.275895
FBgn0266756	0.712663	0.670306
FBgn0037756	0.238376	0.211214
FBgn0051148	0.00373889	0.00131297
FBgn0037265	0.0693886	0.0596663
FBgn0039326	0.0111503	0.0116616
FBgn0000303	1.3433	1.20029
FBgn0051342	0.332668	0.345593
FBti0019394	0.00271209	0.00219905
FBgn0037251	0.0906812	0.0623838
FBgn0262825	0.0131861	0.0120832
FBgn0039800	0.216794	0.110476
RR48385-transposable-element	0.012735	0.00667104
FBgn0262801	0.209539	0.205611
FBgn0265376	0.0840533	0.114052
FBgn0051365	0.157733	0.10854
FBgn0037788	0.144688	0.441226
FBgn0000463	0.0554978	0.0562686
FBgn0011217	0.977563	1.27035
FBgn0038609	0.0293818	0.0299664
FBgn0039640	0	0.0217283
FBgn0039555	0.168603	0.133542
FBgn0038585	0.14225	0.120075
FBgn0083991	0.497892	0.538938
FBgn0051151	0.924386	0.898546
FBgn0039886	0.00797536	0.00252005
FBgn0037536	0.389751	0.462811
FBgn0038651	0.157099	0.22728
FBgn0039212	0.202132	0.156094
FBgn0265101	0.183789	0.149116
FBgn0051216	0.0365501	0.047687
FBgn0051279	0	0
FBgn0044812	0.0767615	0.0180176
FBgn0038583	0.108144	0.126267
FBgn0039335	0.0754747	0.0441335
FBgn0039757	1.91399	1.59152
FBgn0039241	0.119899	0.0659484
FBgn0024432	0.284211	0.305467
FBgn0040571	0.256724	0.480957
FBgn0015331	0.161456	0.179558
FBgn0037482	0.1784	0.201703
FBgn0038948	0.10856	0.111442
FBgn0039159	0.108796	0.128411
FBgn0286042	0.0128286	0.00763216
FBgn0038425	0.0683983	0.0422979
FBgn0039045	0.00550998	0.00167787
FBgn0040532	1.10691	1.78279
FBgn0038893	0.151502	0.100387
FBgn0022349	0.53083	0.509496
FBgn0038325	0.150371	0.13715
FBgn0038304	0.0819703	0.0785298
FBgn0038532	0.425253	0.39187
FBgn0039855	0.0134869	0.0107982
FBgn0037291	0	0.00291792
FBgn0013981	1.14144	1.33976
FBgn0037687	0.0562685	0.0257958
FBgn0013759	2.29708	2.31353
FBgn0038889	0.122358	0.0689529
FBti0019334	0.00654509	0.00244421
FBgn0024555	0.799466	0.823668
FBti0020301	0.00880537	0.00332
FBgn0261641	1.82285	1.59914
FBgn0039737	0.810555	0.630798
FBgn0086605	0.140277	0.119909
FBti0019288	0.0125099	0.0112109
RR48333-transposable-element	0.0682465	0.0226106
FBgn0022787	0.542326	0.528235
FBgn0039564	0.0954425	0.0203076
FBgn0027610	0.361197	0.41474
FBgn0038388	0.296396	0.311404
FBgn0266053	0.293886	0.26447
FBgn0038653	1.30309	1.31375
FBgn0037973	0.0144905	0.00375551
FBti0019439	0.0269099	0.0202232
FBgn0038084	0.373357	0.259989
FBgn0039756	0.0268214	0.0246442
FBgn0086371	0.130401	0.11685
FBgn0024321	0.749719	0.754763
FBgn0260243	0.13272	0.109072
FBgn0259740	0.139181	0.144741
FBgn0039227	0.178607	0.15208
FBgn0038665	0.423532	0.545157
FBgn0038312	0.0404386	0.0368918
FBgn0040283	0.543597	0.561032
FBgn0015222	1.13601	1.28261
FBgn0013347	0.216738	0.290267
FBgn0038079	0.0043222	0
FBgn0037520	0.01345	0.00605007
FBgn0037263	0.0101037	0.0129658
FBgn0051229	0.2288	0.30225
FBgn0038803	0.294569	0.223943
FBgn0038172	0.256124	0.249806
FBgn0085438	0.0123933	0.0132065
FBti0019356	0.00397661	0.00194643
FBgn0261984	0.283988	0.306492
FBgn0083975	1.13606	1.19656
FBgn0037627	0.0232208	0.00143137
FBgn0267742	0.00585699	0.0183836
FBgn0266252	0.0078116	0.00784931
FBgn0008646	0.00600814	0.00688956
FBgn0039282	0.700537	0.807867
FBgn0039017	0.0281065	0.0393308
FBgn0037879	0.00351916	0.0105174
FBgn0259938	0.725359	0.636211
FBgn0004597	0.06998	0.057277
FBgn0039637	0.185466	0.193569
FBgn0037589	0.141055	0.136857
FBgn0038872	0.499569	0.511587
FBgn0039273	0.0504586	0.0577809
FBgn0039116	0.275047	0.198937
FBgn0037503	0	0.00414548
FBgn0250755	0.123735	0.0936115
FBgn0038596	0.147838	0.189499
FBgn0037989	0.693759	0.640644
FBgn0037713	0.0514957	0.0363746
FBgn0038686	0.144583	0.134419
FBgn0037778	0.0296377	0.0287108
FBgn0051469	0.0249945	0.0171553
FBgn0037615	0.00409495	0.00141085
FBgn0027338	0.561304	0.636277
FBgn0263143	0.0299451	0.0300109
FBgn0266705	0.0422788	0.00825802
FBgn0003884	1.46771	1.34372
FBgn0010433	0.0122488	0.00898951
FBgn0051051	0.170735	0.128226
FBgn0262483	1.81281	1.75036
FBgn0039600	1.4543	1.20164
FBgn0003339	0.076828	0.0504607
FBgn0051111	0.0678298	0.0465144
FBgn0250753	0.856012	0.91375
FBgn0038472	0.0814271	0.136182
FBgn0266401	0.000971272	0.00380418
FBgn0001234	5.4085	5.31387
FBgn0265140	0.780885	0.813973
FBgn0038324	0.0350345	0.0239932
FBgn0015282	0.241382	0.201731
FBgn0037652	0.105083	0.12033
FBti0020294	0.0487171	0.0256835
FBgn0003308	0.012926	0.00407429
FBgn0039294	0	0.000832895
FBgn0038282	1.71625	1.66683
FBgn0266801	2.29431	2.06936
FBgn0038608	0.00219565	0
FBgn0020407	0.043545	0.0290021
FBgn0039452	0.0137455	0.00197804
FBgn0028992	0.106076	0.122793
FBgn0003093	1.55131	1.57967
FBgn0037280	0	0.00451807
FBgn0039099	0.0704368	0.101574
FBgn0038845	0.00577649	0
FBgn0038427	0.262173	0.252468
FBgn0038681	0.0111013	0.049962
FBgn0039831	1.31625	1.29452
FBgn0039175	0.0793246	0.0361652
FBgn0027378	0.166183	0.154941
FBgn0038593	0.0532555	0.0853764
FBgn0037960	0.0262818	0.0174419
FBgn0039115	0.0968691	0.0673389
FBgn0038327	0.0508396	0.0568375
FBgn0261928	2.54697	2.39442
FBgn0003598	0.243169	0.172524
FBgn0037398	0.00633101	0.0133615
FBgn0010355	0.429367	0.494967
FBgn0010173	0.142798	0.129547
FBgn0039736	0.00106609	0.00130947
FBti0019304	0.0320215	0.0452208
FBgn0261808	0.219884	0.149918
FBti0020330	0.00471445	0
FBgn0040534	0.217407	0.278949
FBgn0037739	0.0449927	0.0487216
FBgn0038353	0.0370017	0.0140568
FBgn0053202	1.20606	1.19793
FBti0019448	0	0.0122815
FBgn0039135	0.274751	0.361792
FBgn0265420	0.0275105	0.0649708
FBgn0039844	0.5237	0.603079
FBgn0266390	0.0466066	0.0504787
FBgn0037468	0.316432	0.256032
FBgn0038080	0.0997551	0.0564485
FBgn0051092	0.828369	0.776342
FBgn0010313	1.48993	1.39711
FBgn0038487	0.0136977	0.0152534
FBgn0042104	0.0126404	0.00111509
FBgn0011582	1.1985	1.20814
FBgn0040670	0.013733	0.0103201
FBgn0037895	0.0647327	0.140167
FBgn0069923	0.772963	0.858178
FBgn0051029	0.0173321	0.0106659
FBgn0040601	0	0.000422798
FBti0062536	0.00141607	0.00557583
FBgn0039678	0.00277033	0.00182743
FBgn0037638	0.0705968	0.0781965
FBti0019373	0.0164204	0.0169182
FBgn0039505	0.298708	0.23283
FBgn0039816	0.984038	0.767841
FBgn0250839	0.240485	0.639498
FBgn0039788	0.008466	0.000740176
FBgn0028468	0.0181945	0.0174141
FBgn0039862	0.689874	0.674708
FBgn0003482	0	0.00251361
FBgn0038548	0.11716	0.0813223
FBgn0013973	0.874464	0.901541
FBgn0037892	0.14867	0.166116
FBgn0086686	1.38132	1.58725
FBgn0051473	0.00397446	0.0163069
FBti0059723	0	0
FBgn0038598	0.00620014	0.00294992
FBgn0261049	0.103134	0.114561
FBgn0039337	0.0842921	0.0922108
FBgn0021750	0.0784233	0.0444333
FBgn0037686	1.66944	1.5639
FBti0019339	0.0166605	0.013082
FBgn0038968	0.0883332	0.118273
FBgn0263316	0.0139052	0.0190212
FBgn0039343	0.00566269	0.00212581
FBgn0038547	0.233604	0.190076
FBgn0010812	0.130843	0.100622
FBgn0259215	0.0116172	0.00745531
FBgn0085331	0.0132628	0.020101
FBgn0037958	0.02611	0.0215606
FBgn0002733	0.0290886	0.0244657
FBgn0263626	0.0201635	0.00720281
FBgn0265164	0.0300349	0.0267671
FBgn0083969	0.352122	0.427413
FBti0059720	0.269067	0.138582
FBgn0039525	0.150615	0.130903
FBgn0285963	0.5175	0.523818
FBgn0266753	0	0.00301993
FBgn0028717	0.587439	0.599103
FBgn0038307	0.15169	0.161417
FBgn0051126	0.128104	0.134702
FBgn0037543	0.0404378	0.027138
FBgn0262081	0.742531	0.844135
FBgn0262972	0.603805	0.857298
FBgn0037688	0.0418878	0.0628632
FBgn0027514	0.106317	0.100732
FBgn0051040	0.098658	0.0995166
FBgn0037515	0.0883899	0.0243594
FBgn0267815	0.0023009	0.0027399
FBgn0011281	0	0.0150714
FBgn0037297	0.178405	0.142924
FBgn0266137	0.444375	0.433874
FBgn0051005	0.238608	0.162242
FBgn0037473	0.0797639	0.125049
FBgn0039380	1.08388	1.09622
FBgn0043005	0.00534926	0.000956797
FBgn0002941	0.0966922	0.0964763
FBgn0037810	0.211603	0.191673
FBgn0051223	0.0452486	0.0208503
FBgn0039043	0.0120112	0.00398195
FBgn0260990	0.434432	0.31624
FBgn0037646	0.11193	0.0547317
FBgn0003861	0.0536198	0.039937
FBti0061864	0.00832368	0.0142689
FBgn0264839	0.00391611	0.0020818
FBgn0260742	0.449312	0.450405
FBgn0051248	0.215902	0.387965
FBgn0260462	0.431626	0.411798
FBgn0037312	0.185401	0.135419
FBti0062082	0.0422953	0.0258904
FBgn0037342	0.222201	0.148033
FBgn0261004	0.0336216	0.0600737
FBgn0027376	0.0212406	0.0152819
FBgn0004049	0.666475	0.616389
FBgn0039733	0.167215	0.133399
FBgn0039209	1.23149	1.32018
FBti0019469	0.0796115	0.00760919
FBgn0267778	0.00398401	0.00362254
FBgn0038857	0.0800248	0.105181
FBgn0037696	0.0110008	0.00599481
FBgn0265380	0	0.00641011
FBgn0037655	0.567669	0.459731
FBgn0264785	0.39838	0.40867
FBgn0038925	0.43992	0.372722
FBgn0267763	0.00410309	0.00263624
FBgn0015570	0.0101629	0.00100775
FBgn0038541	0.00565466	0.00835298
FBgn0038934	0.266915	0.211935
FBgn0000477	0.177182	0.0761413
FBgn0038236	0.0152789	0.00194673
FBgn0004595	4.40481	4.41713
FBgn0261046	1.41882	1.32351
FBgn0062442	0.424614	0.399012
FBgn0038795	0.0332794	0.0250226
FBgn0038984	0.63545	0.479006
FBti0019399	0.00723169	0.00056702
FBgn0039188	0.104983	0.100221
FBgn0037900	0.0798584	0.108953
FBgn0000455	0.199082	0.159138
FBgn0038603	0.302628	0.236707
FBgn0038233	0.0855543	0.124404
FBgn0039075	0.439577	0.450519
FBgn0287605	0.0249225	0.0135579
FBgn0039249	0.0468829	0.0640223
FBgn0265421	0.0161741	0.00701422
FBgn0038272	0.0677818	0.0492099
FBgn0038855	0.0620086	0.0961315
FBgn0041605	3.31031	3.24035
FBgn0260487	0.000768414	0.00970735
FBgn0038194	0.275546	0.000726515
FBgn0038039	0.252002	0.142519
FBgn0038316	0.229411	0.197426
FBgn0039730	0.231755	0.231409
FBti0019305	0.0165113	0.0163554
FBgn0038243	0.0778916	0.0180661
FBgn0028646	0.280064	0.338517
FBgn0038662	0.177285	0.241061
FBgn0029176	0.791851	0.543983
FBgn0260386	0.00877701	0.0100977
FBgn0010051	0.698822	0.650229
FBti0148146	0.027055	0.0097059
FBgn0037870	0.0302523	0.00309441
FBgn0037566	0.295694	0.270698
FBgn0037736	0.846191	0.779131
FBti0062444	0.0413573	0.0216945
FBgn0016693	0.369387	0.40474
FBgn0265190	0.0954715	0.0894799
FBgn0261279	0.451399	0.354965
FBgn0263974	0.0071061	0.012346
FBgn0004644	0.010949	0.00190791
FBgn0039003	0.0450401	0.0622325
FBgn0038166	0.0550571	0.0510209
FBgn0085405	0.221218	0.163514
FBgn0037238	1.40953	1.26859
FBgn0051041	0	0.000932322
FBgn0004237	0.740481	0.68369
FBgn0085376	0.681516	0.551413
FBgn0259823	0.749555	0.683415
FBgn0051036	0	0.00508559
FBgn0037643	0.879325	0.883227
FBgn0265048	0.0395341	0.011321
FBgn0037262	0.344595	0.341031
FBgn0004882	0.608909	0.472837
FBgn0264075	0.136002	0.187795
FBgn0038705	0.015651	0.0170688
FBgn0025456	0.0996502	0.0676757
FBgn0039628	0.00708712	0.018262
FBgn0085412	1.3484	1.31092
FBgn0037293	0.116732	0.126265
FBgn0263782	0.161598	0.129039
FBgn0027109	0.028477	0.1641
FBgn0267570	0.170303	0.139644
FBgn0085431	0.00908652	0.0192142
FBgn0052855	0.0234497	0.0124413
FBgn0000071	0.00254489	0
FBgn0046114	0.241017	0.19819
FBgn0038326	0.0995507	0.13329
FBgn0026257	0.0200991	0.0473736
FBgn0037931	0.141792	0.132472
FBgn0023495	0.00340574	0
FBgn0267229	0.0601629	0.0348489
FBgn0287209	0.0869259	0.0169454
FBgn0261638	0.00053031	0.0097879
FBgn0037758	0.301768	0.522105
FBti0019438	0	0
FBgn0038818	0.0368638	0.0678012
FBgn0037378	0.0593924	0.0640503
FBgn0039342	0.00646302	0.00384613
FBgn0039612	0.0771905	0.0299235
FBgn0015790	0.63991	0.718505
FBgn0039631	0.0977653	0.0797393
FBgn0039178	0.0817116	0.105017
FBgn0264986	0.0271997	0.0314411
FBgn0085433	0.652087	0.63369
FBgn0037702	0.674644	0.651077
FBgn0037924	0.139008	0.0965311
FBgn0027579	0.165835	0.109148
FBgn0086362	0.128463	0.111117
FBgn0038295	0.224538	0.239408
FBgn0029170	0.0196061	0.0171122
FBgn0261086	0.292808	0.323244
FBgn0037814	0.0890714	0.11995
FBgn0037922	0.0956191	0.0803865
FBgn0016672	0.422319	0.457809
FBgn0028475	0.177327	0.156318
FBgn0263231	1.10536	1.10597
FBgn0001180	0.0791077	0.120339
FBgn0051272	0	0.00258736
FBgn0037440	0.0293473	0.0325169
FBgn0045473	0	0
FBgn0039616	0.00304639	0.0105873
FBgn0037317	0.110406	0.117182
FBgn0039673	0.00118346	0.001802
FBgn0013812	0	0.00897306
[truncated: 14,074 more rows]

## Sheet: TmY14
geneID	control_normalizedReadsCounts	tau P251L KI_normalizedReadsCounts
FBgn0250732	0.197231	0.205422
FBgn0037409	0.00572753	0.00421059
FBgn0027948	0.742435	0.854316
FBgn0038675	0.406989	0.337588
FBgn0000500	0.00781364	0.0331179
FBgn0037610	0.0813623	0.0820206
FBgn0267571	0.261704	0.231647
FBgn0261859	0.756241	0.899171
FBgn0037363	1.27928	1.26052
FBgn0039552	0.0336147	0.0141234
FBgn0039732	0.168154	0.107905
FBgn0038224	1.58765	1.39002
FBgn0264776	0.018518	0.00436643
FBgn0038525	0	0.00396284
FBgn0261436	0.106514	0.085227
FBgn0038814	0.0185426	0.011251
FBgn0286871	0	0.00123552
FBgn0038279	0.00141759	0
FBgn0037625	0.363974	0.260235
FBti0019436	0.030111	0.0257517
FBgn0027574	0.171716	0.168036
FBgn0260746	0.00154576	0.000528911
FBgn0037930	0.147294	0.20239
FBgn0027095	0.384733	0.33982
FBgn0051450	0.629998	0.442208
FBgn0037794	0.252806	0.23666
FBgn0039229	1.29725	1.25538
FBti0019348	0.0141444	0
FBgn0038737	0.0627271	0.0469023
FBti0019411	0.00495168	0.0263104
FBti0020393	0.0213455	0.0136257
FBgn0039291	0.035918	0.0402919
FBgn0037547	0.0245609	0.00937442
FBgn0038966	0.00529078	0.0242898
FBgn0037690	0.510183	0.429584
FBti0019321	0.011068	0.00418285
FBgn0038055	0.277657	0.239288
FBgn0261792	0.225189	0.167065
FBgn0040606	0.00168951	0.0148611
FBgn0037709	0.0100936	0.0066436
FBti0062552	0.0744538	0.0569732
FBgn0037777	0.233911	0.159481
FBgn0046685	0.0135981	0.00524729
FBgn0039313	0.00627137	0.0169585
FBgn0004395	1.32664	1.46923
FBgn0266674	0.109286	0.0943813
FBgn0039019	0.21339	0.151762
FBgn0039172	0.334906	0.292983
RR46358-transposable-element	0.549189	0.609701
FBgn0011290	0.69225	0.629009
FBgn0267816	0	0.000974693
FBgn0037747	0.644207	0.562064
FBgn0039073	0.00793028	0.00445506
FBgn0040256	0	0.00292288
FBgn0039404	0.207724	0.135556
FBgn0005674	0.122498	0.103211
FBgn0011768	0.123469	0.0653389
FBgn0037917	0.465949	0.519852
FBgn0086365	0.0174904	0.0344165
FBgn0017567	0.95941	0.794681
FBgn0039290	0.146861	0.171869
FBti0019361	0.00345992	0.00163782
FBgn0051287	0.00243018	0.00186834
FBgn0038577	0.0704014	0.039583
FBgn0037720	0.0103207	0.0458096
FBgn0001112	0	0.0117718
FBgn0038344	0.0882596	0.0399076
FBgn0037678	0.0307725	0.0158045
FBgn0267709	0	0.000338488
RR48352-transposable-element	0.00947081	0.0103263
FBgn0051072	0.634614	0.64113
FBgn0013277	0.0874608	0.0081686
FBgn0037718	0.177324	0.15408
FBgn0286071	0.00171514	0
FBgn0265197	0.00319696	0.0140384
FBgn0003002	0.00764284	0.0490451
FBgn0041588	0.186698	0.150373
FBgn0039557	0.138063	0.140999
FBti0020309	0.00544988	0.00680158
FBgn0051028	0.00088645	0
FBgn0266598	0.0475874	0.0160782
FBgn0038725	0.629437	0.532574
FBgn0263757	0.0038214	0.00239042
FBgn0039277	0.463804	0.470038
FBgn0039302	0.37484	0.391919
FBgn0039461	0.348238	0.289241
FBgn0037894	0.0672064	0.0480046
FBgn0039817	0.00795689	0.00484391
FBgn0051224	0.735699	0.827689
FBgn0054008	0.00299069	0.000817738
FBgn0013276	2.02589	2.41714
FBgn0039714	0.321269	0.293342
FBgn0037802	0.0507426	0.0210736
FBgn0039328	0	0.00835182
FBgn0051116	0.00954206	0.0442091
FBgn0266672	0.282979	0.245953
FBgn0037292	0.044893	0.0167116
FBgn0017550	0.685147	0.73596
FBgn0037679	0.221121	0.234923
FBgn0040609	0	0.0014022
FBgn0038113	0.00122902	0.00334447
FBgn0014931	0	0.00307131
FBgn0267408	0.0161993	0.00130649
FBgn0038115	0.00504913	0.0124847
FBgn0038745	0.412773	0.4347
FBgn0038321	0.219185	0.208752
FBgn0263594	1.21376	1.25219
FBgn0083984	0.121976	0.116202
FBgn0015568	0.0135437	0.00143453
FBgn0038881	1.75434	1.77948
FBgn0259139	1.34247	1.12943
FBgn0039258	0.0550454	0.0480775
FBgn0039415	0.0223473	0.0256683
FBgn0264427	0.0573304	0.0594638
FBgn0004841	0.208729	0.201643
FBgn0275433	0.00508912	0.0030319
FBti0019345	0.00280367	0.00233221
FBgn0002924	0.0261286	0.0202026
FBgn0051211	0.889084	0.843762
FBgn0267612	0.00459917	0.00843421
FBgn0037993	0.420801	0.451301
FBgn0262962	0.057288	0.032929
FBgn0038049	0.32157	0.261764
FBgn0005777	0.210196	0.206351
FBgn0261238	0.634668	0.65066
FBgn0037891	0.893139	0.696921
FBgn0039182	0.139037	0.125939
FBgn0085345	0	0.00251786
FBgn0085383	0.968073	1.07655
FBgn0040080	0.254491	0.21688
FBgn0037383	0.0725613	0.0410735
FBgn0037779	0.00471045	0.00325246
FBgn0000533	0.00190335	0.00229679
FBgn0263025	0.0448438	0.0369682
FBgn0264291	0.106729	0.10211
FBti0019286	0.0124803	0.0316853
FBgn0010340	0.130905	0.130926
FBgn0039722	0	0.00813243
FBgn0038490	0.103252	0.080559
FBgn0265276	1.62218	1.77069
FBgn0014930	0.0996144	0.0784966
FBgn0038809	0.544597	0.498636
FBgn0038678	0.812966	0.629662
FBgn0037478	0.179155	0.131133
FBgn0038428	0.301823	0.232426
FBgn0038853	1.66974	1.70733
FBgn0038306	0.0601384	0.0592836
FBgn0046876	0.00397694	0
FBgn0051320	0.125823	0.0991219
FBgn0051184	0.0920755	0.0779775
FBgn0037276	0.00779308	0.000182611
FBgn0039870	0.112497	0.0983384
FBgn0003165	2.89778	2.78676
FBgn0039463	0.00201169	0.000738085
FBgn0038760	0.0854142	0.0851196
FBgn0002781	0.981865	0.870312
FBgn0039311	0.00711348	0.0479904
FBgn0038034	0.0143048	0.0300899
FBgn0053970	0.00674477	0.00267443
FBgn0038332	0.175044	0.161815
FBgn0024957	0.233819	0.204228
FBgn0023212	0.427313	0.355839
FBti0061713	0.00126476	0.000577166
FBgn0027492	2.24371	2.28228
FBgn0011289	0.401183	0.285839
FBti0019404	0.000699398	0
FBgn0015269	0.857933	0.954711
FBgn0010399	0.541145	0.578859
FBgn0266750	1.12082	0.938829
FBgn0039054	1.55438	1.68565
FBgn0286828	0.142526	0.136829
FBgn0028734	0.794488	0.815676
FBgn0039789	0	0
FBgn0037849	0.391117	0.408473
FBgn0011766	0.917099	1.02634
FBgn0267430	0.0361831	0.0207869
FBti0020308	0.00347192	0.00560192
FBgn0051510	0.459815	0.44532
FBti0019447	0.0225635	0.0144821
FBgn0038535	1.01042	1.00635
FBgn0260444	0.275566	0.176072
FBgn0038437	0.156423	0.134586
FBgn0038369	0.309958	0.288092
FBti0019461	0.293729	0.262227
FBgn0262904	0	0.00952035
FBgn0263047	0.0346776	0.03123
FBgn0011785	0.371247	0.378833
FBgn0037705	1.56708	1.69022
FBgn0038454	0.229107	0.232551
FBgn0260743	0.634495	0.564783
FBgn0039879	0.00358147	0
FBgn0267116	0.00163142	0.00737123
FBgn0039820	0.00387242	0.000953528
FBgn0067629	0.0444945	0.0427777
FBgn0017590	2.0391	1.98474
FBgn0039726	0.188412	0.141704
FBgn0260634	1.16998	1.15253
FBgn0037231	0.998567	0.974891
FBgn0267685	0.00398555	0.00703698
FBgn0037817	0.00283859	0.00516997
FBgn0262858	0.2048	0.191457
FBgn0004876	1.36779	1.27389
FBgn0039685	0.0303371	0.0379346
FBgn0004117	0.0234011	0.0100378
FBgn0037811	0.000946072	0.00724426
FBgn0038354	0.0173755	0.0351403
FBgn0037834	0.124337	0.12431
FBgn0003248	0	0.0800726
FBgn0000723	0.0436414	0.0430199
FBgn0051030	1.60496	1.56148
FBgn0038199	0.894282	0.719389
FBgn0037313	0.630663	0.593939
FBgn0037890	0.764938	0.60458
FBgn0039350	0.734074	0.738024
FBgn0037546	0.434527	0.582768
FBgn0015781	0.301363	0.203533
FBgn0002522	0.00200456	0.000836993
FBgn0037737	0.604395	0.593019
FBgn0051551	0.00241982	0.00117396
FBgn0051514	0	0.00079467
FBti0019380	0.140188	0.0831816
FBgn0039215	0.216908	0.19831
FBgn0264901	0.118617	0.129247
FBgn0037943	0.26354	0.233076
FBgn0038478	0.441009	0.460746
FBgn0028684	0.262171	0.256612
FBgn0051195	0.0975635	0.100737
FBgn0028487	0.233524	0.196251
FBgn0002719	0.51423	0.495487
FBgn0027841	0.0680468	0.0921721
FBgn0261479	0.213408	0.117522
FBgn0039696	0.121594	0.0748173
FBgn0038331	0.658716	0.529213
FBgn0051202	0.000681527	0
FBgn0267118	0.0239576	0.0287067
FBgn0039261	0.456882	0.55111
FBgn0266744	0.00851002	0.0184984
FBgn0267337	0.19063	0.190852
FBgn0037746	0.00776774	0.0115651
FBgn0038854	0.070966	0.0688619
FBgn0267200	0.00351032	0.00353287
FBgn0037656	0.03924	0.0120771
FBgn0037700	0.297126	0.237405
FBgn0038839	1.17872	1.40344
FBgn0037466	0.798418	0.774116
FBti0019320	0.003233	0.0054955
FBgn0039101	0.000814674	0.0095826
FBgn0011655	0.434741	0.444064
FBgn0039274	0.0363341	0.0283236
FBgn0039731	0.0347751	0.0320684
FBti0019466	0.0218594	0.0251111
FBgn0039250	0.00190753	0.0135755
FBgn0015513	0.158052	0.182191
FBgn0017581	2.56265	2.66464
FBgn0020249	0.414842	0.410425
FBgn0040600	0.0221055	0.156016
FBgn0024329	0.144848	0.15239
FBgn0004842	0.00546279	0.00762652
FBgn0039465	1.30501	1.3495
FBgn0013343	3.05278	3.02354
FBgn0002940	0.00626011	0.231685
FBgn0027873	0.0753191	0.0834852
FBgn0038197	0.01922	0.0237471
FBgn0039346	0.452546	0.361563
FBgn0266372	0.00157999	0.00207779
FBgn0038952	0.0310997	0.0602175
FBgn0000139	0.194827	0.136545
FBgn0020238	2.82826	2.82798
FBgn0038476	0.302845	0.373454
FBgn0039341	0.0739023	0.0781047
FBgn0037850	0.0103295	0.0156756
FBgn0037908	0.493096	0.402893
FBgn0037270	1.19855	0.957494
FBgn0038540	0.379966	0.254696
FBgn0038965	0.302621	0.263526
FBgn0039609	0.00293089	0.00142694
FBgn0003268	0.0203966	0.0202406
FBgn0260935	0.166716	0.138357
FBgn0026566	0.407251	0.285005
FBgn0266700	0.00211239	0.0313315
FBgn0037540	0.0293439	0.0444835
FBgn0039703	0	0.00221266
FBgn0039529	0	0.00620754
FBgn0044871	0.248189	0.156596
FBgn0039674	0.537243	0.484126
FBgn0051522	0.663979	0.675672
FBgn0283535	1.89508	1.83768
FBgn0023083	0.349594	0.364503
FBgn0037902	0.348401	0.336497
FBgn0051133	0.0279028	0.0188601
FBgn0004107	0.122792	0.103368
FBti0063150	0.0278945	0.00923953
FBgn0250823	1.86986	1.87141
FBgn0037950	0.0361487	0.0367249
FBgn0037714	0.004875	0.00439712
RR48301-transposable-element	0.0030872	0.003613
FBgn0037844	0.0461023	0.0344957
FBgn0267199	0	0.00275587
FBgn0037883	0.209012	0.128439
FBgn0039877	0	0.00546939
FBgn0038206	0.170786	0.156885
FBti0059759	0.0158288	0.0286322
FBgn0039764	0.190401	0.23025
FBgn0038402	0.00529553	0.00234518
FBgn0039286	0.021882	0.0400624
FBgn0038183	0.097743	0.0704663
FBgn0038412	0	0.000421063
FBgn0038806	0.328771	0.224445
FBgn0022943	0.299542	0.244931
FBgn0005585	0.994415	0.67732
FBgn0040212	0.258891	0.270724
FBgn0053189	0.00265367	0.00720811
FBgn0040551	0	0.00381104
FBgn0261885	1.59817	1.73813
FBgn0039494	0.0582553	0.0211861
FBgn0037955	0.218136	0.126626
FBgn0011701	0.0100275	0.0274196
FBgn0086253	0.014701	0.00846766
FBgn0038498	1.34464	1.36138
FBti0020312	0.00122849	0.0064274
FBti0019299	0.0168732	0.0924325
FBgn0038592	0	0.00299532
FBgn0063127	0.00301599	0.00844466
FBgn0038257	0	0.00454083
FBgn0263453	0.00979165	0.0144619
FBgn0264841	0	0.000513274
FBgn0015240	0.191587	0.156467
FBgn0261261	0.813761	0.922879
FBgn0039109	0.256686	0.191708
FBgn0027563	0.0420801	0.0118538
FBgn0004387	0.823238	0.802956
FBgn0265068	0.00385518	0.00976602
FBgn0038195	0.864145	0.712241
FBgn0262477	2.18072	1.95496
FBgn0039543	0.0827579	0.0663363
FBgn0020018	0.0436811	0.0416816
FBgn0267435	0	0.0125336
FBgn0014366	0.127738	0.0647189
FBgn0037305	0.226955	0.128555
FBgn0037670	0.17687	0.204301
FBgn0037923	0.0487363	0.0534523
FBgn0264912	0.00631094	0.00106055
FBgn0037708	0.0975506	0.0515032
FBgn0038589	0.0337509	0.0261899
FBgn0040078	0.12535	0.0881985
FBgn0038165	1.15753	1.12254
FBgn0037668	0.003011	0.00119233
FBgn0266717	0.860806	0.935869
FBgn0039026	1.16389	1.23679
FBgn0039332	0.0264275	0.136511
FBgn0039635	0.898388	0.738174
RR48332-transposable-element	0	0.000885651
FBgn0038029	0	0
FBgn0038755	0.491834	0.548629
FBgn0260440	0.0164919	0.0124735
FBgn0038744	0.0037083	0.0093791
FBgn0026315	0	0.00099682
FBgn0003651	0.893913	0.946959
FBti0019396	0.14034	0.540339
FBgn0085391	2.18633	2.34471
FBgn0038170	0.00188432	0.0112156
FBgn0005649	0.950136	0.956877
FBti0062875	0	0.00981509
FBgn0039536	1.00705	1.10357
FBgn0262559	1.32382	1.084
FBgn0037326	0.907228	0.892418
FBti0020313	0.00269156	0
FBgn0037377	0.133154	0.120321
FBti0063296	0.00480621	0.00537586
FBgn0037743	0.156817	0.139588
FBgn0267702	0.00841416	0.0113882
FBgn0039431	0.968295	1.14976
FBgn0038475	0.141064	0.0976284
FBgn0263117	0.11017	0.0709512
FBgn0039240	0.833676	0.861551
FBti0020323	0.00324502	0.00820452
FBgn0037815	0.0317693	0.0291083
FBgn0265422	0.00581729	0.00318337
FBti0019405	0.0191074	0.0137623
FBgn0039804	0.00650053	0.0040887
FBgn0086134	0.405689	0.296768
FBgn0027570	0.234241	0.224808
FBgn0037933	0.459922	0.363437
FBgn0037299	0.21067	0.185881
FBgn0037912	0.0188445	0.0337955
FBgn0037279	0.255329	0.232237
FBgn0038145	0.977375	0.856896
FBgn0053293	0.0098393	0.00229816
FBgn0038740	0.342981	0.469569
FBgn0001297	0.695989	0.917886
FBgn0028968	0.285459	0.275483
FBgn0013767	0	0.0173195
FBgn0040582	0.033036	0.00784601
FBgn0038390	0.00249272	0.00452978
FBgn0264827	0	0.00304263
FBgn0003512	0.226488	0.187221
FBgn0024909	0.235291	0.202979
FBgn0262983	0.00159695	0
FBgn0038450	0.00273329	0.00415285
FBgn0038866	0.0340342	0.0213067
FBti0019297	0	0.00136627
FBti0019431	0.0121147	0.0129465
FBgn0038894	0	0.00366369
FBgn0039876	0.136169	0.126149
FBgn0022344	0.43301	0.336705
FBgn0038989	0.0898644	0.0942074
FBgn0026441	0.581468	0.636073
FBgn0038980	0.906415	0.91245
FBgn0016119	1.87075	1.57834
FBgn0267753	0.0095098	0.00305556
FBgn0010770	0.106559	0.103014
FBgn0038196	0.328007	0.316624
FBgn0016650	0.0080766	0.0153886
FBti0061737	0.0236366	0.0209658
FBgn0037354	0.121269	0.0865908
FBgn0038461	0.197379	0.164733
FBgn0000246	0.13146	0.139579
FBgn0038139	0.0180877	0.0307766
FBgn0039830	2.62219	2.35677
FBgn0037848	0.330916	0.391498
FBgn0038870	0.0740701	0.0881864
FBgn0086768	0.462542	0.325838
FBgn0039403	0.0153953	0.0249
FBgn0285925	2.23335	2.38363
FBgn0063649	0.175253	0.211064
FBgn0038286	0.993607	1.14262
FBgn0027494	0.00924384	0.00502136
FBgn0039272	0.0259038	0.0297282
FBgn0040682	0.00192932	0.00710603
FBgn0039232	0.027361	0.0117267
FBgn0003480	0.0183062	0.0111039
FBgn0039734	0.443646	0.318497
FBgn0051388	0.228714	0.205993
FBgn0264816	0.0716072	0.075173
FBgn0038303	0.122154	0.11727
FBgn0051441	0.037662	0.0320455
FBgn0038652	0.010875	0.0238212
FBgn0039611	0.0209864	0.00618012
FBgn0000447	0.292314	0.187225
FBgn0039300	2.41228	2.07329
FBgn0263022	0.00370393	0.00108364
FBgn0039022	0.0188071	0.00236531
FBgn0039098	0.0063461	0.0010435
FBgn0039626	0.238959	0.237212
FBgn0010768	0.353424	0.365856
FBgn0039848	0.00404695	0.00124028
FBti0019296	0.0356089	0.0244736
FBgn0085308	0.0214291	0.0286776
FBgn0037602	0.110481	0.0550098
FBgn0039690	0.171726	0.18138
FBgn0015402	0.118443	0.165828
FBgn0002773	0.00547016	0.00293363
FBgn0026634	0.0950751	0.137846
FBgn0051217	0.0251209	0.0117686
FBgn0039379	0.189415	0.202185
FBgn0038361	0.00065063	0.0038212
FBgn0262127	0.19048	0.252947
FBgn0051019	0	0.00103698
FBgn0001321	0.00930805	0.0087469
FBti0019398	0.00476498	0.011029
FBgn0025781	0.0399009	0.0401904
FBgn0038275	0.200487	0.131565
FBgn0039254	0.251424	0.234388
FBti0019337	0.0171263	0.0133109
FBgn0039265	0.260088	0.220504
FBgn0038697	0.00404233	0.00100895
FBgn0263738	0.0180599	0.0111901
FBgn0037680	0.17595	0.138208
FBgn0243511	0.18754	0.211456
FBgn0039682	0.21808	0.0873845
FBgn0020385	0.0275084	0.0150838
FBgn0000036	1.87303	2.04523
FBgn0038313	0.188121	0.124993
FBgn0267680	0.0032689	0.0129626
FBgn0039104	0	0
FBgn0038914	0.00470279	0.000883554
FBgn0260745	0.0517839	0.0386735
FBgn0038828	0.533702	0.411716
FBgn0037773	0.0464645	0.0628247
FBti0019468	0.00974437	0.00476934
FBgn0038642	0	0
FBgn0083950	1.73382	1.93478
FBti0020328	0.0600186	0.0842094
FBgn0000247	0.317186	0.268047
FBti0019429	0.0162193	0.00332592
FBgn0028374	0.0490515	0.0347037
FBgn0266408	0.00263708	0.00445342
FBgn0038619	0.149197	0.12918
FBgn0038976	0.472948	0.344436
FBgn0043884	1.39286	1.5127
FBgn0038957	0.116625	0.111132
FBgn0267801	0.00910962	0.010281
FBgn0038247	0.00152379	0.00113331
FBgn0037213	0.0029623	0.00776594
FBgn0038827	0.000422962	0.0238474
FBgn0243512	1.12686	1.17076
FBgn0085320	0.00208898	0.00213056
FBgn0020626	0.21227	0.175632
FBgn0054027	0.00858727	0.0052671
FBgn0038108	0.727199	0.697784
RR48372-transposable-element	0.00413694	0.00214524
FBgn0266418	0.494967	0.563902
FBgn0039315	0.00279187	0.00844367
FBgn0267385	1.5586	1.3797
FBgn0037443	0.948204	0.898303
FBgn0038747	0.244167	0.256429
FBgn0039638	0.0323401	0.0202849
FBgn0004901	0.00702323	0.00730163
FBgn0038376	0.204554	0.218717
FBgn0038380	0.00446986	0.0067334
FBgn0039705	0.164481	0.133915
FBgn0038057	0.0835436	0.0396617
FBgn0023097	0.551378	0.586824
FBgn0083986	0.501482	0.383881
FBgn0037376	0.201169	0.186706
FBgn0037249	0.563505	0.532576
FBgn0039531	0.103844	0.12358
FBgn0039883	1.83494	2.04475
FBti0019407	0.00739033	0.038019
FBgn0039767	0.261616	0.220518
FBgn0264491	0.0069689	0.031494
FBgn0266730	0.0117124	0.0076173
FBgn0002354	0.359923	0.318495
FBgn0038143	1.40692	1.46548
FBgn0263755	0.0299037	0.0128659
FBti0020386	0.0082879	0.0600744
FBgn0001139	1.13775	1.16806
FBgn0041710	0.0187453	0.00632709
FBgn0045862	0.263989	0.222927
FBgn0039064	2.11676	2.32226
FBgn0038638	0.0188824	0.0153773
FBgn0085382	1.32987	1.4184
FBgn0039048	0.0043269	0.00425007
FBgn0005632	0.802618	0.950236
FBgn0037439	0.0716446	0.093001
FBgn0085413	1.53216	1.6555
FBgn0039491	0.00238325	0.00626318
FBgn0039413	0.0228336	0.0100963
FBgn0087013	0.44019	0.420432
FBgn0039509	0.256509	0.278181
FBgn0014342	0.0405412	0.0405986
FBgn0038607	0	0
FBgn0023178	0	0.00197295
FBgn0051161	0.0503792	0.0616339
FBgn0037489	0.220686	0.182745
FBgn0037624	0.411323	0.385389
FBgn0039835	0.19029	0.193841
FBgn0259227	0.0498361	0.0500633
FBgn0051361	1.44051	1.4424
FBgn0037722	0.0496148	0.0519606
FBgn0038865	0.00296738	0.000974057
FBgn0039854	0.321509	0.259828
FBgn0266413	0	0.000560062
FBgn0261575	0.0126863	0.00966058
FBgn0039861	0.455853	0.464803
FBgn0038460	0.0114336	0.00412514
FBgn0026562	0.142652	0.034882
FBgn0001230	1.96967	2.18631
FBgn0010438	0.159641	0.144022
RR48405-transposable-element	0.0517366	0.0319722
FBgn0015279	0.383908	0.420346
FBgn0038149	0.0141673	0.00620716
FBgn0039233	0.0923752	0.0647021
FBgn0000015	0.00167669	0.00980428
FBgn0039622	0.00299684	0.00262514
FBgn0261550	1.45021	1.27411
FBgn0037382	0.129639	0.135096
FBgn0037573	0.2263	0.210847
FBti0019414	0.00597445	0.0440604
FBgn0016691	1.49023	1.16925
FBgn0051191	0.15371	0.134294
FBgn0038343	0.0175978	0.00869707
FBgn0264694	0.365061	0.256184
FBgn0083985	0.0476328	0.0492323
FBgn0039023	0.0167236	0.0054555
FBgn0263979	0.289223	0.229201
FBgn0038037	0.0258648	0.028564
FBgn0039554	0.179637	0.185411
FBgn0038071	0.0125136	0.00944752
FBgn0027539	0.127904	0.145985
FBgn0051221	1.99642	2.32227
FBgn0002921	4.0267	4.15344
FBgn0267764	0.0162742	0.0111209
FBti0019445	0.00308047	0.00466654
FBgn0039711	0.00583893	0.0183273
FBgn0001215	1.27028	1.23915
FBgn0265351	0.0332177	0.0227843
FBgn0038268	0.120799	0.114729
FBgn0037698	1.99933	1.93575
FBgn0039299	0	0
FBgn0027608	1.83334	1.87872
FBgn0025808	0.105209	0.053132
FBgn0038981	0.00186075	0.00384535
FBgn0039338	0.730482	0.69304
FBgn0285955	0.0235728	0.0380352
FBgn0261995	0.38194	0.285149
FBgn0038716	0.000754858	0.001439
FBgn0039538	0.061449	0.041251
FBgn0039360	0.139786	0.0990962
FBgn0026314	0.00901519	0.0085595
FBgn0264902	0.0112565	0.00106737
FBgn0038092	0.498474	0.407319
FBgn0011474	0.50097	0.521212
FBgn0261649	0.85433	0.862653
FBgn0037537	0.00130988	0.00961212
FBgn0038975	2.06228	2.10907
FBti0059740	0.00307289	0.00548151
FBgn0039163	0.273818	0.244491
FBgn0003257	0.0247327	0.0395259
FBgn0263390	0.0125393	0.00479532
FBgn0061476	0	0.00245858
FBgn0267233	0.0175636	0.0231584
FBgn0038330	0.451524	0.407937
FBgn0267443	0	0.00935752
FBgn0267781	0.00398806	0.00746241
FBgn0260463	0.00225246	0.00229492
FBgn0039396	0.0789637	0.0520354
FBgn0051523	0.249335	0.276856
FBgn0044826	0.59763	0.703736
FBgn0037981	0.156665	0.118068
FBgn0037433	0.00814126	0.000256317
FBgn0039562	0.260383	0.269805
FBgn0040259	0.0260854	0.00221117
FBgn0039836	0.0460569	0.051828
FBgn0019624	1.97181	1.68506
FBgn0038849	0.00174155	0.00142386
FBgn0037338	0.0616039	0.0422902
FBgn0028688	0.189072	0.130748
FBgn0038144	0.00132523	0.0123548
FBgn0283468	0.663029	0.744108
FBgn0039802	0.595943	0.398609
FBgn0287225	0.198529	0.146217
FBgn0040493	0.0634401	0.0643178
FBti0059798	0.142561	0.10675
FBgn0016685	0.342747	0.33516
FBgn0039136	0.201088	0.37463
FBgn0037446	0.365499	0.384194
FBgn0038721	0.151636	0.179832
FBgn0011672	0.162327	0.154205
FBti0019422	0.062865	0.208214
FBgn0039697	0.0942459	0.0512662
FBgn0027518	0.0669931	0.0803179
FBgn0037873	1.29188	0.997054
FBgn0039713	2.31205	1.86473
FBgn0039602	0.351569	0.373057
FBgn0039067	0.100944	0.086207
FBgn0039589	0.131053	0.110379
FBgn0037760	0.778378	0.916694
FBgn0039118	0.00386233	0.0127627
FBgn0038063	1.9153	1.84234
FBgn0039349	0.342794	0.335631
FBgn0039483	0	0.00175597
FBgn0037896	0.00524699	0
FBgn0267799	0.000752447	0.0111248
FBgn0038569	0.184183	0.187493
FBgn0013813	0.00119373	0.0011236
FBgn0038546	0.477333	0.42387
FBgn0037621	0.267773	0.240318
FBgn0002937	0.0021526	0.0109095
FBgn0003169	0.567824	0.621595
FBgn0004897	0.00564877	0.000343788
FBgn0037780	0.261169	0.245338
FBgn0262582	2.04989	2.20052
FBgn0038741	0.0346387	0.0457154
FBgn0051207	0	0.00123108
FBgn0025879	0.0289755	0.0462072
FBgn0040253	0	0
FBgn0085384	1.90748	2.04067
FBgn0027562	0.00210297	0.00195501
FBgn0039594	0.0370235	0.0173023
FBgn0037324	0.00467193	0.00600561
FBgn0038234	0.238718	0.192617
FBgn0039197	0.00392653	0.00309125
FBgn0019925	0.485615	0.404285
FBgn0037611	0.0897589	0.0726554
FBgn0266599	1.53878	1.39911
FBgn0039065	0.358707	0.268534
FBgn0038765	0.0541881	0.0487177
FBgn0038584	0.00978193	0.035144
FBgn0039687	0.0302298	0.012759
FBgn0037885	0.109563	0.0756133
FBti0019372	0.0121474	0.00389893
FBgn0266268	0.164055	0.164346
FBgn0040623	0.48385	0.302375
FBgn0051176	0.294365	0.273325
FBgn0051477	0.00176547	0.000716834
FBgn0039204	0.356297	0.217704
FBgn0038179	0.00312953	0
FBgn0038588	0.136314	0.148497
FBgn0037574	0.103675	0.0835151
FBgn0038878	0.00137619	0.000623962
FBgn0026576	0.317969	0.279132
FBgn0266916	0.05214	0.0727282
FBgn0039305	0.241552	0.170636
FBgn0038014	0.00359154	0.00203416
FBgn0250910	0.889353	0.902342
FBgn0265274	0.0187407	0.0576389
FBgn0263413	1.09531	1.09441
FBgn0037618	0	0.00107155
FBgn0038156	0.946319	0.929634
FBgn0267766	0.000824654	0.00390666
FBgn0026417	0.0467154	0.0173858
FBgn0038028	0	0.00226003
FBgn0001197	1.10922	0.923069
FBgn0013278	0.320245	0.367358
FBgn0039376	0	0
FBgn0024558	0.211986	0.136299
FBgn0039875	0.318269	0.269354
FBgn0037556	0.502581	0.471798
FBgn0041707	2.26023	2.20733
FBgn0037225	0.0294863	0.0202029
FBgn0004510	0.102574	0.0616335
FBgn0051140	2.00955	2.1669
FBgn0266697	0.0258463	0.0229491
FBgn0025571	0.571548	0.568708
FBti0062854	0	0
FBgn0039347	0.331704	0.308655
FBgn0086704	0.00705311	0.0226194
FBgn0037391	0.72409	0.590435
FBgn0038829	0.271743	0.21952
FBgn0000454	0.0575119	0.0630951
FBgn0039348	0.24119	0.184566
RR48349-transposable-element	0.0697296	0.0110915
FBgn0037215	0.00717599	0.00857608
FBgn0037538	0.129635	0.0958375
FBti0020385	0.0126187	0.0266079
FBgn0037999	0.00378009	0.00184858
FBgn0027657	0.144264	0.183277
FBgn0038909	0.00902798	0.00786064
FBgn0038127	0.0152734	0.00919136
FBgn0053207	0.320442	0.333177
FBgn0039467	0.0247374	0.00649738
FBgn0267661	0	0.0022313
FBgn0020912	0.0120976	0.0113609
FBgn0004606	0.538235	0.656066
FBgn0038771	0.202626	0.109745
FBgn0037992	0	0.00939064
FBgn0037671	1.3675	1.1151
FBgn0051345	0.33691	0.294436
FBgn0037661	0.0073114	0.0033042
FBgn0038673	0.0623179	0.0421121
FBgn0037548	0.020862	0.00397288
FBgn0037506	0.0143886	0.0238828
FBgn0028837	0.202192	0.142062
FBgn0260794	0.960505	1.08252
FBgn0266464	0.289362	0.176225
FBgn0037622	0.13711	0.108289
FBti0019458	0.0132171	0.0089658
FBgn0037798	0.361435	0.211139
FBgn0039151	0.00509711	0.00209469
FBgn0086472	2.40121	2.17344
FBgn0082831	0.384128	0.385354
FBgn0040608	0.000836116	0.00263268
FBgn0043457	0.188663	0.160811
FBgn0039740	0.101032	0.0823088
FBgn0038617	0.244897	0.194503
FBgn0037845	0	0.00436269
FBgn0270928	0.446073	0.703875
FBgn0038397	0	0
FBgn0038365	0.00824582	0.00608352
FBgn0037749	0.169736	0.0999088
FBgn0285911	0.136474	0.159748
FBgn0037290	0.00287493	0.00182946
FBgn0002626	2.13772	1.95264
FBgn0040227	0.421555	0.291064
FBgn0038447	0.00807566	0.00282555
FBgn0038438	0.227815	0.170073
FBgn0039068	0.0143397	0.0323655
FBgn0046225	0.301959	0.28525
FBgn0024289	0.0102319	0.00743983
FBgn0015625	0.0119325	0.021278
RR46410-transposable-element	0.0122904	0.00687037
FBgn0038601	0.104874	0.117589
FBgn0038271	1.53149	1.25035
FBgn0015737	0.303411	0.249749
FBgn0027524	0.0687395	0.0556291
FBgn0003507	0.00135508	0.00170312
FBgn0042106	0	0.00156585
FBgn0039471	0.00117831	0.00288362
FBti0020298	0.0915066	0.0712472
FBgn0003525	0.0707739	0.00302555
FBgn0015229	2.10727	2.15546
FBgn0283499	1.25789	1.17334
FBgn0039490	0.000705154	0.000345059
FBgn0037384	0.135494	0.163792
FBgn0265082	1.63535	1.79817
FBti0019350	0.0157101	0.0261948
FBgn0037239	0.3853	0.326073
FBgn0051313	0.0071944	0.0167966
FBgn0039698	0.206907	0.170649
FBgn0037553	0.0318903	0.00438608
FBgn0038173	0	0.0127291
FBgn0265419	0.0266477	0.0191386
FBti0019326	0.0143106	0.0097691
FBgn0051125	0.11365	0.121912
FBgn0039829	0.194357	0.16536
FBgn0010328	0.511127	0.633687
FBgn0038515	0.718797	0.819848
FBgn0039776	0.254423	0.29506
FBgn0019957	0.783042	0.624715
FBgn0000150	1.21973	1.05504
FBgn0038047	0.00367346	0.0123907
FBgn0002645	0.64881	0.821931
FBgn0004436	1.01932	1.0512
FBgn0069242	0.421354	0.308945
FBgn0083946	0	0
FBgn0038381	0	0.0034807
FBgn0051373	0	0.00347306
FBgn0044823	0.0883805	0.0766794
FBgn0053108	0.0996925	0.101757
FBgn0051174	0.0389017	0.0481922
FBgn0267810	0.0075243	0.00447806
FBgn0001280	0.242179	0.183799
FBgn0016917	0.763997	0.827378
FBgn0039339	0.0258462	0.0155283
FBgn0038038	0.0592906	0.00610946
FBgn0267953	0	0.000890405
FBti0019282	0	0
FBgn0039040	0	0.000874754
FBgn0038250	0.0506002	0.0124538
FBgn0038056	0.152324	0.116051
FBti0019425	0.00990885	0.0112583
FBgn0004118	0.680568	0.5905
FBgn0026190	0	0
FBgn0003889	0.0171125	0.0230216
FBgn0051550	0.444379	0.458215
FBti0062420	0.124907	0.107105
FBgn0027865	0.78171	0.755199
RR48326-transposable-element	0.0302159	0.235809
FBgn0286507	0.00437934	0.00848583
FBgn0037672	0.108749	0.176553
FBgn0038846	0	0.000420589
FBgn0038371	0.013265	0.00470513
FBgn0039544	0.27461	0.254436
FBgn0263750	0.0161332	0.00904201
FBgn0039846	0.0270389	0.037418
FBgn0010247	1.55338	1.40315
FBgn0261380	0.268922	0.180311
FBgn0037762	0.00411927	0.00081506
FBgn0040588	0.00422003	0.0069876
FBgn0051436	0.0051847	0.00490721
FBgn0037703	0.0617855	0.0760298
FBgn0040208	0.247042	0.24473
FBti0059724	0	0.003515
FBti0019390	0.00308824	0
FBgn0039252	0.180862	0.175161
FBti0019384	0.0281045	0.0438404
RR48318-transposable-element	0.121793	0.0954085
FBgn0038654	0.00223177	0.0147528
FBti0019393	0.00295701	0
FBgn0004369	2.40225	2.35309
FBti0019364	0.00896537	0.00461731
FBgn0014869	1.34667	1.23281
FBgn0262167	0.05634	0.0924264
FBgn0051460	0.205456	0.0945652
FBgn0002632	0.00716071	0.00467988
FBgn0039145	0.0122708	0.00228787
FBti0019376	0.00350162	0.00509481
FBgn0037978	0.270393	0.242906
FBgn0037359	0.104199	0.0913996
FBgn0038211	0.0330989	0.0188282
FBgn0039488	0.232	0.205182
FBgn0039234	0.198806	0.17524
FBgn0039747	0.0485584	0.0156578
FBgn0038202	0.298364	0.299253
FBgn0038597	0.0708534	0.0654958
FBgn0038237	1.67725	1.59044
FBgn0010113	1.96856	1.93578
FBgn0039743	0.344431	0.36999
FBgn0038083	0.00190079	0
FBgn0038972	0.0116747	0.00322784
FBgn0027620	0.55714	0.506507
FBgn0039170	0.0408638	0.0364691
FBgn0039759	0	0.00381607
FBgn0051467	0.0260541	0.010509
FBgn0002441	0.293379	0.287882
FBgn0014141	0.0319767	0.036019
FBgn0038251	0.251903	0.224197
FBti0061829	0	0.00134274
FBgn0025457	0.169375	0.144101
FBgn0037653	0.274099	0.208604
FBgn0038261	0	0.000504089
FBgn0039593	0.00390797	0
FBgn0039321	0.0360736	0.010226
FBgn0266227	0.991582	0.490598
FBgn0051198	0.00694388	0
FBgn0039645	0.00378031	0.000315591
FBgn0039187	0.592033	0.565834
FBgn0037304	0.0635814	0.0688027
FBgn0037913	0.148765	0.270205
FBgn0261552	3.50148	3.66464
FBgn0038897	0.0282919	0.0030338
FBgn0037836	0.00299525	0
FBgn0266581	0.126467	0.137488
FBgn0037856	0.134056	0.112664
FBgn0038947	0.879033	0.82545
FBgn0039849	0.0420143	0.0279043
FBgn0016123	0	0.0141563
FBgn0038318	0.161439	0.171804
FBgn0039559	0.0987934	0.14117
FBgn0264426	0	0.00169619
FBgn0037370	0.0502876	0.0343204
FBgn0037835	0.00122317	0
FBgn0027493	0.394017	0.349624
FBgn0261053	0.00371317	0.00282898
FBgn0037801	0.00117586	0.00903965
FBgn0051451	4.27791	4.82326
FBgn0038256	0	0.0136433
FBgn0038549	0.300093	0.312583
FBgn0004087	0.00594378	0.00443688
FBgn0037472	0.5203	0.393697
FBgn0260962	0.209703	0.242301
FBgn0037684	0.00260048	0.00163827
FBgn0038722	0.126004	0.126114
FBgn0261356	0.0042539	0.00243885
FBgn0051475	0.228104	0.267059
FBgn0039738	0.697546	0.759945
FBgn0039381	0.603947	0.602575
FBgn0037250	0.209252	0.163868
FBgn0051155	0.22561	0.129397
FBgn0027526	0.122046	0.111851
FBgn0039271	0.0692425	0.0774255
FBgn0037607	0.240106	0.0596897
FBgn0037550	0.122649	0.0863496
FBgn0038693	1.33852	1.41694
FBgn0038877	0.133173	0.201441
FBgn0039766	0.1468	0.129477
FBgn0038106	0.19697	0.160639
FBgn0003275	0.628448	0.572621
FBgn0038045	0.0072551	0.00459628
FBgn0037408	0.164284	0.131912
FBgn0038407	0.00709286	0.00165877
FBgn0039644	0.140461	0.167531
FBgn0037819	0.0167036	0.0082632
FBgn0037235	0.0902907	0.0780782
FBgn0038923	0.304525	0.225259
FBgn0037843	0.319933	0.31104
FBgn0053208	0.72144	0.798826
FBgn0087012	1.14659	1.09194
FBgn0051547	0.0504431	0.0348876
FBgn0040575	0.252858	0.237044
FBgn0039154	0.00610827	0.00232789
FBgn0038805	0.219082	0.137379
FBgn0051301	0.191365	0.153138
FBgn0260722	0.346429	0.503802
FBgn0262538	0	0
FBgn0038198	0.00401363	0.0134855
FBgn0039296	0.186902	0.144885
FBgn0039344	0.00212254	0.0104625
FBgn0038435	0.0148089	0.0141549
FBgn0037683	0.00400511	0.00106184
FBgn0037371	0.051014	0.0590767
FBgn0037345	0.112715	0.0614226
FBgn0037614	0.365572	0.32797
FBgn0037525	2.14664	2.07548
FBgn0038046	0.273727	0.184046
FBgn0038536	0.087793	0.0845514
FBgn0037330	0.230233	0.160768
FBgn0259685	0.0559898	0.0908925
FBgn0038946	0.00793576	0.00217378
FBgn0037533	0.843882	0.703076
FBgn0037712	0.0624812	0.0510296
FBti0019423	0	0.00126665
FBgn0038953	0.0781384	0.074464
FBgn0051390	0.41747	0.296
FBgn0038627	0.096806	0.0297159
FBgn0027583	0.212321	0.16532
FBgn0039632	0.145767	0.133569
FBgn0037442	0.953928	0.966888
FBgn0004103	1.08622	1.02832
FBgn0039702	0.101398	0.0786478
FBgn0026059	0.940265	1.0246
FBgn0039683	0.00388875	0.0110594
FBgn0046756	0.00254408	0.000870165
FBgn0039125	0.0417017	0.032383
FBgn0038467	0.0250755	0.0285518
FBgn0010926	0.210192	0.177246
FBgn0038387	0.288449	0.205389
FBgn0037244	0.408836	0.270578
FBgn0037979	0.201138	0.276276
FBgn0038225	0.00270687	0.00157364
FBgn0015591	0.364957	0.610143
FBgn0037613	0.100309	0.0528751
FBgn0051262	0.00316456	0.00286488
FBgn0040528	0.0230602	0.0153117
FBgn0051183	0.117275	0.0754717
FBgn0014029	0.556518	0.407318
FBgn0013949	0.0831384	0.042811
FBgn0037504	0.130232	0.173514
FBgn0037941	0.596489	0.585775
FBgn0267758	0.00498404	0
FBgn0267562	0.00159695	0
FBgn0023179	1.58734	1.67265
FBgn0051104	0.00139383	0.00268126
FBgn0046258	0.00320625	0.00040321
FBgn0038095	0.0491165	0.00142904
FBgn0038723	0.266975	0.194668
FBgn0022359	0.0372647	0.021443
RR48350-transposable-element	0.0306816	0.0147585
FBgn0051251	0.0571644	0.0709653
FBgn0039113	0.0773459	0.0820134
FBgn0038277	0.00429908	0.00214894
FBgn0262473	0.738937	0.874495
FBgn0259222	1.18905	1.01962
FBgn0016120	1.63431	1.32956
FBgn0037853	0.0103053	0.00514591
FBgn0262974	0.00685205	0.0365942
FBgn0038606	0.614546	0.729474
FBgn0039869	0.265182	0.173142
FBgn0026565	0	0.00409931
FBgn0037723	0.148757	0.162502
FBgn0264741	0.00404767	0.00164365
FBgn0266698	0.00577179	0.00486871
FBgn0265041	0.0228079	0.026829
FBgn0038426	0.749873	0.588312
FBgn0037719	0.114279	0.1486
FBgn0038002	0.0127188	0.00183651
FBgn0027508	0.307884	0.302175
FBgn0003205	1.10687	1.01582
FBgn0002772	0	0
FBgn0027497	0.351172	0.314621
FBgn0039454	0	0.00290959
FBgn0038471	0.156109	0.111279
FBti0019430	0.0294486	0.0318241
FBgn0051144	0.0017141	0.00465876
FBgn0024833	0.395393	0.351271
FBgn0014879	0.367363	0.251172
FBgn0039420	0.796477	0.891973
FBgn0039210	0.266693	0.30162
FBgn0039055	0.214993	0.209866
FBgn0024330	0.375906	0.404897
FBgn0038590	0.0557522	0.0479867
FBgn0278604	0.0273907	0.0637123
FBgn0024944	0.602781	0.645575
FBgn0261015	0.00711406	0.016343
FBti0019437	0.0329729	0.0162829
FBgn0039189	0.0221938	0.0209589
FBgn0054041	0	0.00158365
FBgn0266735	0	0.00753252
FBgn0002868	0.19577	0.258523
FBgn0065098	0.70301	0.309626
FBgn0051352	0.615879	0.713621
FBgn0014135	0.133618	0.0931276
FBti0063293	0.00328211	0.0161003
FBgn0039642	0.0856891	0.0781871
FBgn0265189	0.0294171	0.0319404
FBgn0266719	0.00792257	0.00699619
FBgn0000166	0	0.000456326
FBgn0283438	0.503422	0.470914
FBgn0039680	0.00782579	0.0145628
FBgn0051445	0.00228666	0.00636914
FBgn0053329	0.00134477	0.00187541
FBgn0037901	0.0328766	0.0271563
FBgn0039664	0.0862039	0.0671506
FBgn0039427	0.400041	0.304974
FBgn0022338	0.201039	0.152662
FBgn0285959	0.0228881	0.0138319
FBgn0039056	0.29215	0.273959
FBgn0051370	0.00170685	0.00363555
FBgn0022800	0.00261426	0.00468946
FBgn0267160	0.411198	0.00273092
FBgn0003479	0.00743328	0.072104
FBgn0051300	0.00216263	0.0188035
FBgn0028471	0.579966	0.571866
FBgn0051326	0.0644461	0.028461
FBgn0038110	0.107065	0.0659395
FBti0019369	0.0082753	0.0248352
FBgn0037975	0	0
FBgn0264495	1.7154	1.73075
FBgn0037726	0.000466281	0
FBgn0013576	2.43851	2.50333
FBgn0038401	0.283621	0.218885
FBgn0019972	0.0765519	0.051959
FBgn0264005	0.549034	0.490932
FBgn0044511	0.523217	0.427514
FBgn0038087	0.668089	0.717617
FBgn0261393	0	0
FBgn0037606	0.324028	0.332715
FBgn0037632	0.158344	0.0951589
FBgn0038054	0.0229924	0.00960848
FBgn0010803	0.159301	0.113448
FBgn0037730	0.00735645	0.00129291
FBgn0038565	0.00126081	0.0076281
FBgn0039633	1.39682	1.56828
FBgn0039110	0.13243	0.116676
FBti0061925	0.0232992	0.016473
RR48325-transposable-element	0.0539307	0.0147367
FBgn0003867	0.00240321	0.00766843
FBgn0052944	0.337143	0.305362
FBgn0039558	0.199428	0.142568
FBgn0004618	0.00140631	0.00914343
FBgn0038013	0.159472	0.114493
FBgn0066101	1.01128	1.09058
FBgn0039169	0.138462	0.167929
FBgn0003862	1.60246	1.65231
FBgn0038840	0.0234427	0.0272705
FBgn0259113	0	0.00103482
FBgn0039580	0.309542	0.267373
FBgn0002783	0.264756	0.285952
FBgn0250746	0.267962	0.246317
RR42049-transposable-element	0.00787444	0.00825122
FBgn0051231	0	0.000875267
FBgn0015351	0.0948555	0.0555422
FBgn0263662	0	0.00321118
FBgn0039203	0.034781	0.012323
FBgn0004587	1.90714	1.84013
FBgn0000039	0.627414	0.645916
FBgn0086346	0.449313	0.387238
FBgn0039013	0.073376	0.0620829
FBgn0037792	0.121223	0.102807
FBgn0039882	0.206223	0.182952
FBgn0262614	0.610691	0.641926
FBgn0000416	0.633499	0.612789
FBgn0039451	0.368426	0.361931
FBgn0042213	0.203034	0.152579
FBgn0010750	0.332457	0.284902
FBgn0011740	0.166825	0.16519
FBgn0037877	0.211753	0.188046
FBgn0038826	2.54151	2.51058
FBgn0051118	0.643809	0.551996
FBgn0039430	0.404918	0.443397
FBgn0039479	0.000729536	0
FBgn0038682	0.00241767	0.00187325
FBgn0039084	0	0
FBgn0039675	0.00539739	0.00389097
FBgn0038018	0	0
FBti0062874	0	0.00249454
FBgn0038929	0.421242	0.339171
FBgn0038950	0.15075	0.137582
FBgn0038720	0.0847992	0.0850174
FBgn0051008	0	0.00267478
FBgn0267239	0.000495452	0.00194672
FBgn0003882	0.213853	0.159837
FBgn0039647	2.12394	2.06481
FBgn0001149	0.200824	0.0412921
FBgn0083949	1.70479	1.77147
FBgn0267567	0.0157286	0.0120757
FBgn0067783	0.104886	0.177542
FBgn0038400	1.11543	0.950043
FBgn0266248	0.00784589	0.00956123
RR48386-transposable-element	0.076973	0.0761109
FBti0019377	0.0134989	0.014046
FBgn0038167	0.293875	0.236786
FBgn0038290	0.31085	0.00342016
FBgn0038788	0.246425	0.173172
FBgn0037521	1.54721	1.77329
FBgn0264325	0.162318	0.145629
FBgn0019960	0.536188	0.503202
FBgn0259244	1.22165	1.27743
FBgn0004509	1.45077	1.53814
FBgn0037710	0.101385	0.0689396
FBgn0038542	0.754692	0.76052
FBgn0046247	0.71272	0.580096
FBgn0037831	0.317942	0.264763
FBgn0037465	0.17894	0.19141
FBgn0259736	0.0224327	0.0654906
FBgn0037772	0	0.00156539
FBgn0086608	0.000516543	0.00173524
FBgn0038916	0	0.00161917
FBgn0038767	0.0995127	0.0997733
FBgn0005596	0.0834626	0.11606
FBgn0037315	0.212999	0.20763
FBgn0020235	1.38667	1.04458
FBgn0265159	0.000810935	0.00455238
FBgn0039158	0.10356	0.0587519
FBgn0038830	0.474564	0.213804
FBgn0260944	1.08758	0.724684
FBti0019392	0.0181896	0.00759933
FBgn0051439	0.00487708	0.00539675
FBgn0039620	0.0169737	0.00384571
FBgn0037937	0	0
FBgn0040554	0.00449177	0.00972199
FBgn0085454	0.0135823	0.0127612
FBgn0039266	0.103368	0.136934
FBgn0039639	0.0485972	0.023353
FBgn0261929	0.135525	0.195632
FBgn0039532	0.269586	0.285242
FBgn0039710	0.201771	0.164093
FBgn0037757	0.143599	0.161279
FBgn0037295	0.494561	0.469413
FBgn0085466	0.000756271	0
FBgn0038876	0.300789	0.195527
FBgn0037899	1.36584	1.08605
FBgn0039867	0.0520934	0.0462743
FBgn0053213	0.071222	0.0675801
FBgn0038146	0.0447962	0.0441824
FBgn0039625	0.0851461	0.0671666
FBti0062423	0.0774133	0.0897147
FBgn0038880	0.367584	0.270381
FBgn0037754	1.19577	1.18277
FBgn0260005	0.0178175	0.0346191
FBgn0026250	1.95988	1.86071
FBgn0037660	0.233303	0.191671
FBgn0037878	0.353936	0.332893
FBgn0053547	2.58772	2.6381
FBti0019470	0.0174271	0.0242318
FBgn0037356	0.153095	0.0957236
FBgn0038738	0.163306	0.107483
FBgn0038816	0.10218	0.137271
FBgn0004908	0.240495	0.156228
FBgn0263740	0.216899	0.161316
FBgn0038474	0.393753	0.231335
FBti0019463	0.0407357	0.0234867
FBgn0259704	0.154306	0.068533
FBgn0005659	0.00380384	0.000395519
FBgn0015019	0.274067	0.262021
FBgn0265067	0.0316348	0.0307928
FBgn0263351	0.421742	0.37432
FBgn0051374	0.0101189	0.000359344
FBgn0267757	0.0138366	0.045942
FBgn0000083	0.0792498	0.0750574
FBgn0039214	0.643269	0.642983
FBgn0262869	1.52715	1.70613
FBgn0011481	1.88224	1.92738
FBgn0038463	0.0463364	0.0466105
FBgn0010772	1.72417	1.69472
FBgn0038180	0.00283972	0
FBgn0037427	0.00163456	0.000754128
FBgn0004666	0.00862127	0.0097525
FBgn0037341	0.160413	0.107541
FBgn0037841	0.0351588	0.0304623
FBti0019435	0.0113807	0.0138101
FBgn0014380	0.00595341	0.00158517
FBgn0011666	2.52534	2.64114
FBgn0263650	0.0184872	0.02346
FBgn0266745	0.00496634	0.00275502
FBgn0038735	0.534596	0.503911
FBgn0039356	0.0760847	0.0531927
FBgn0038917	0.00454299	0.0206654
FBgn0267698	0.965816	0.96625
FBgn0037583	0.0160113	0.0101686
FBgn0038446	0.390433	0.36244
FBgn0262955	0.223103	0.209692
FBgn0038429	0.124746	0.0989633
FBgn0040524	0.00108556	0.000806692
FBgn0014018	0.0773224	0.0569583
FBgn0039629	0.0014608	0.00731101
FBgn0037875	0.117997	0.0824079
FBgn0266673	0.160197	0.15719
RR48319-transposable-element	0.0415144	0.160647
FBgn0026380	0.418905	0.255246
FBgn0037483	0.017173	0.0231854
FBgn0004898	0.000754656	0.00325049
FBgn0038787	0.535136	0.611181
FBgn0051457	0.0673824	0.0530811
FBgn0037619	0.0546564	0.0488435
FBgn0039117	0.0762495	0.0406457
FBgn0086370	0.711092	0.665804
FBgn0037750	0.00786068	0.00362684
FBgn0038205	0.01505	0.0134701
FBti0020307	0.124709	0.102205
FBgn0010877	0.580921	0.599311
FBti0019409	0.00116857	0.00225945
FBgn0263408	0.000605614	0.00486884
FBgn0266668	0.190559	0.170502
FBgn0039407	0.0091791	0.00509368
FBgn0039489	0.0803417	0.0589915
FBgn0037609	0.259225	0.19523
FBgn0037796	0.0179956	0.0146055
FBgn0000504	0.0062363	0.0248794
FBgn0260793	0.812227	0.853691
FBgn0039066	0.522675	0.521083
FBgn0038974	0.144829	0.104767
FBgn0037637	2.51138	2.21824
FBgn0039688	0.522049	0.639146
FBgn0051549	0.148639	0.152999
FBgn0051278	0.0535382	0.0400727
FBgn0039504	0.000688162	0.000245526
FBgn0000659	0.864888	0.835955
FBgn0038349	0.0119004	0.00345152
FBgn0038129	0.178816	0.120975
FBgn0038766	0.0247229	0.0451306
FBgn0038868	0.265926	0.17592
FBgn0015778	1.80056	1.89511
FBgn0051103	0.00370933	0
FBgn0046214	0.525	0.444819
FBgn0046696	0.137251	0.180685
FBgn0039355	0.0455755	0.0296971
FBti0061892	0	0
FBgn0051324	1.78735	1.70412
FBgn0037454	0.0706312	0.114247
FBgn0039257	0.0443579	0.0562572
FBgn0267551	0.0323661	0.0241633
FBgn0011715	0.256986	0.192121
FBgn0037716	0.448284	0.434956
FBgn0028708	0.196898	0.136507
FBgn0038890	0.518798	0.572786
FBgn0037648	0.222118	0.20139
FBgn0037569	0.0424779	0.0343017
FBgn0067628	0.0736417	0.0429208
FBgn0039402	0.28401	0.263137
FBgn0039156	0.0693495	0.0716902
FBgn0024958	0.255369	0.223942
FBgn0004359	0.00378065	0.00639807
FBgn0243514	0.00631963	0
FBgn0037707	0.28629	0.242867
FBgn0039566	0.153657	0.164819
FBgn0024222	0	0.00240575
RR48336-transposable-element	0.00562467	0.00510404
FBgn0003499	1.55842	1.68133
FBgn0037561	0.0622192	0.0464344
FBgn0039102	0.016083	0.00195376
FBgn0038683	0.407767	0.369286
FBgn0038420	0.0143636	0.0292217
FBgn0039111	0.146165	0.123815
FBti0062083	0.00271889	0.00473169
FBgn0039137	0.115935	0.0990513
FBgn0011581	0.00875101	0.000786403
FBgn0260741	0.0814446	0.0756505
FBgn0039120	0.33778	0.294735
FBgn0262577	0.00625579	0.0144891
FBgn0051453	0.0348432	0.0391764
FBgn0260003	1.03693	1.1692
FBgn0086378	0.690401	0.544718
FBgn0038810	0.128466	0.140749
FBti0020321	0.0190808	0.00813854
FBgn0039449	0.0417322	0.0242534
FBgn0038672	0.320829	0.261979
FBgn0037470	0.217644	0.185559
FBti0061704	0.0229695	0.00686741
FBgn0028476	0.502812	0.574023
FBgn0261285	1.21056	1.49279
FBgn0020496	2.03226	2.05486
FBgn0039581	1.02135	1.03822
FBgn0039528	0.913657	0.995137
FBgn0011336	0.172441	0.165949
FBgn0037552	0.00656222	0
FBgn0046222	0.112699	0.104684
FBgn0039689	0.16773	0.105251
FBgn0037581	0.0284738	0.063027
FBgn0029503	0.0773393	0.0606964
FBgn0016061	2.21338	2.24632
FBgn0027930	0.054392	0.0327331
FBgn0051363	1.65766	1.44735
FBgn0267730	0.00258808	0.00351112
FBgn0262975	0.416213	0.529206
FBgn0267711	0	0
FBgn0039165	0.0632799	0.0484431
FBti0019440	0.0128492	0.0100846
FBgn0262540	0.00401283	0.00332575
FBgn0038551	0.232759	0.229287
FBgn0024841	0.409956	0.281917
FBti0059762	0.0120339	0.00980511
FBgn0267748	0.00232617	0.012031
FBgn0053512	0.86406	0.859928
FBgn0260940	0.2237	0.166806
FBgn0262105	0.00671862	0.00389831
FBgn0037880	0.0794178	0.0417667
FBgn0000064	2.39131	2.47782
FBgn0267790	0.739529	0.684142
FBgn0037874	1.58448	1.32887
FBgn0039623	0.194087	0.213765
FBgn0267780	0.00203926	0.00455181
FBgn0042094	0.139476	0.0884644
FBgn0051098	0.322956	0.266781
FBgn0038488	0.415539	0.447608
FBti0019343	0.00587274	0
FBgn0037372	0.148327	0.116393
FBgn0011476	0.568668	0.432353
FBgn0038928	0.019429	0.0313819
FBgn0020910	2.06799	1.70393
FBgn0037612	0.0175587	0.00730937
FBgn0027578	0.0608845	0.00904802
FBgn0267203	0.00286668	0.000874754
FBgn0038746	0.29225	0.320817
FBgn0038260	0.0093381	0.00326405
FBgn0263620	0.0347134	0.043806
FBgn0011596	0.0100402	0.00763292
FBgn0039126	0.302638	0.218793
FBgn0263768	0.14758	0.165237
FBgn0266409	1.61342	1.60581
FBgn0001138	0.0205534	0.0664521
FBgn0085315	0	0
FBgn0037633	0.0845701	0.0697386
FBgn0028396	0.0548997	0.000883554
FBgn0051431	0.00192407	0.00170676
FBti0020297	0.0370465	0.0452321
FBgn0263929	0.957251	1.11893
FBgn0038269	0.123758	0.106567
FBgn0040238	0.0733726	0.131349
FBgn0039306	0.152827	0.113555
FBgn0053094	0.431574	0.409527
FBgn0037344	0.860107	1.0105
FBgn0265379	0.181972	0.168028
FBgn0037261	1.11802	0.986946
FBgn0039312	0.0481349	0.0526086
FBgn0037755	0.464298	0.379458
FBgn0037918	0.179155	0.212207
FBgn0039801	0.00910352	0.0180005
FBgn0267431	0.151937	0.156658
FBgn0263499	0.00448774	0.00438676
FBgn0039030	0.0184954	0.013085
FBgn0266721	0.448669	0.427297
FBgn0037248	0.153248	0.174694
FBgn0038449	0	0
FBgn0267787	0.00454205	0.00209904
FBgn0014863	0.194069	0.176199
FBgn0039774	0.0245072	0.0262794
FBgn0029512	0.258147	0.156419
FBgn0264357	1.20142	1.18268
FBgn0002622	2.12556	1.76913
FBti0020302	0	0.00207143
FBgn0051233	0	0.00254018
FBgn0039782	0.00411543	0.00451855
FBgn0039464	0.770763	0.758253
FBgn0037944	0.237987	0.280652
FBgn0039213	0.451899	0.441297
FBgn0038099	0	0
FBti0062387	0.00122849	0.00411938
FBgn0037513	0.0210218	0.00592
FBti0019347	0.0220994	0.0239608
FBgn0038922	1.12559	0.951628
FBgn0051100	0	0.00145208
FBgn0264916	0.00735912	0.0144813
FBgn0051360	0.528589	0.444316
FBgn0037759	0.00564728	0.0156458
FBgn0039225	0	0.000703326
FBgn0037325	0.003504	0.00715369
FBgn0037578	0.0733481	0.0750906
FBgn0263663	0.00909616	0.0213484
FBgn0039112	1.19731	0.921463
FBgn0037976	1.28059	0.992609
FBgn0037935	0.00401323	0.00224676
FBgn0024963	2.62714	2.52613
FBgn0038704	0.516327	0.510335
RR42085-transposable-element	0.00713566	0.00912089
FBgn0020510	0.291312	0.196723
FBgn0039723	0.1077	0.130305
FBgn0025802	0.283027	0.275803
FBgn0051244	0.00355549	0.00379009
FBgn0039735	0.243543	0.21576
FBgn0038462	0.200659	0.160497
FBgn0037635	0.0732047	0.105201
FBti0019374	0.0261225	0.0137193
FBgn0038300	0.0920271	0.0658384
FBti0019302	0.00708627	0.0122914
FBgn0001296	0.142003	0.0683915
FBgn0039218	0.462628	0.380587
FBgn0039140	0.407775	0.380429
FBgn0011020	0.0228177	0.0525919
FBgn0286035	0.0047096	0.00649541
FBgn0038168	0.162926	0.147591
FBgn0026400	0.201729	0.173744
FBti0019333	0.00184256	0.00126183
FBgn0038424	0.323405	0.272222
FBgn0038842	0	0.00624826
FBgn0003886	0	0
RR48374-transposable-element	0.00455041	0.00750718
FBti0019416	0.00872872	0.0271945
FBgn0046763	0.00975381	0.0225415
FBgn0083943	0	0.00513725
FBgn0037949	0.729419	0.84404
FBgn0038837	0.252611	0.418329
FBti0019401	0.0260134	0.0158966
FBgn0037435	0.118978	0.10383
FBgn0027951	0.528102	0.570391
FBgn0261599	2.38711	2.08908
FBgn0025865	0.348378	0.308258
FBgn0038595	0	0.00322269
FBgn0286516	3.89387	3.79155
FBgn0051472	0.190835	0.144736
FBgn0037763	0.00702112	0.0036006
FBgn0002906	0.141891	0.19355
FBgn0039130	0.0678936	0.0392484
FBgn0266720	0.413877	0.536542
FBgn0267975	1.22187	1.16793
FBgn0038299	0.0840606	0.0119343
FBgn0267157	0.0211706	0.0146257
FBgn0039595	0.00541038	0.0087564
FBgn0027090	0.0683835	0.0578609
FBgn0038924	0.171607	0.0761741
FBgn0039417	0.118914	0.0637903
FBgn0037445	0.270315	0.362708
FBgn0037240	0.210326	0.20218
FBgn0039081	0.0201301	0.0686302
FBgn0038858	0.0195081	0.0535367
FBgn0038491	0.273967	0.288878
FBgn0037770	0.0433893	0.0851019
FBgn0266414	1.90392	1.7659
FBgn0014022	0.250283	0.19748
FBgn0264907	0.132557	0.159735
FBgn0037236	0	0.000571642
FBgn0037647	0.198005	0.149521
FBti0019428	0.00542869	0.00214442
FBgn0003011	0.592489	0.454696
FBgn0051481	0.0133649	0.0090708
FBgn0003137	0.026355	0.00338698
FBgn0039132	1.01423	0.915206
FBgn0037608	0.25816	0.184896
FBgn0039419	0.234142	0.210463
FBgn0039808	0.888722	0.877553
FBgn0086679	0.262827	0.215339
FBgn0013279	1.62346	1.4239
FBgn0263289	0.885678	0.862261
FBgn0039149	0.840788	0.789579
FBgn0051109	0.221404	0.224319
FBgn0011774	0.0816792	0.068167
RR48347-transposable-element	0.053223	0.0377477
FBgn0259146	0.444598	0.502787
FBgn0025574	0.895877	0.830815
FBgn0038516	0.00650927	0.00259766
FBgn0039712	0.425103	0.293615
FBgn0038769	0.0234883	0.0152006
FBgn0038930	0.0219974	0.0180591
FBgn0037765	0.0017141	0.0121356
FBti0019367	0.00312748	0.0089295
FBgn0028436	0.128375	0.0980858
FBgn0020278	0	0.0231989
FBgn0039857	2.33939	1.89443
FBgn0261988	1.4394	1.34568
FBgn0037838	0.0956871	0.0578247
FBgn0038432	0.292897	0.210682
FBgn0039863	0.370681	0.372004
FBgn0250757	0.00285	0.0151402
FBgn0038088	0.0156519	0.0265136
FBgn0038235	0.192764	0.117569
FBgn0003134	1.32593	1.36736
FBgn0029157	0.251134	0.321176
FBgn0039124	0.0051502	0.00519844
FBgn0087005	0.00181186	0.0199956
FBgn0027654	2.21973	1.76677
FBgn0037676	1.67963	1.65785
FBgn0039492	0.742091	0.770283
FBgn0283536	2.34328	2.16524
FBgn0002431	0.461817	0.592421
FBgn0262741	0.252448	0.16039
FBgn0038533	0.259453	0.216482
FBgn0040071	1.25279	1.25965
FBgn0043900	0.475537	0.48489
FBgn0014006	0.131926	0.174373
FBgn0037920	0.103449	0.0904283
FBgn0037336	0.698559	0.777826
FBgn0028984	0.0438308	0.0195562
FBgn0051414	0.0101048	0.0108089
FBgn0039770	0.23216	0.205315
FBgn0010389	0.00614606	0.011597
FBgn0028833	0.940757	0.82872
FBgn0051538	0.0652553	0.0568015
FBgn0039336	0.0939127	0.0576957
FBgn0263048	0.117779	0.117877
FBgn0051004	0.00806305	0.000948078
FBgn0004622	0.159192	0.229401
FBgn0265426	0.000821778	0
FBgn0028671	1.26959	1.24068
FBgn0038964	0.371587	0.257749
FBgn0015622	0.740956	0.70282
FBgn0038552	0.158883	0.112058
FBgn0037826	0.0110173	0.00670476
FBgn0051064	0.548498	0.61361
FBgn0039651	0	0.000461546
FBti0019402	0.0191979	0.015746
FBgn0037855	0.311409	0.266746
FBgn0264493	1.31032	1.36819
FBgn0039283	0.0327973	0.0350491
FBgn0051344	0.179284	0.16336
FBgn0024912	0.211973	0.118493
FBgn0038389	0.229317	0.214663
FBgn0262125	0.366672	0.333738
FBgn0263490	0.481569	0.471542
FBgn0263414	0.014213	0.00935468
FBgn0264826	0.00942316	0.0063406
FBti0059775	0	0.00359741
FBgn0044810	0	0.0010689
FBgn0082582	0.63249	0.737329
FBgn0020299	0.0220043	0.0362307
FBgn0037490	0.0722369	0.0740439
FBti0019301	0.00128604	0.00268114
FBgn0039094	0.00800516	0.000590171
FBgn0010774	0.80824	0.783207
FBgn0264324	0.440531	0.487575
FBgn0028670	0.00297722	0.00408582
FBgn0039006	0.000936049	0.0036745
FBgn0037332	0.259911	0.274458
FBgn0039691	0.113448	0.0681804
FBgn0037232	0.320946	0.305959
FBgn0037667	0.027008	0.0137887
FBgn0023023	0.776534	0.65038
FBti0061797	0.0019367	0.00308665
FBgn0038862	0.175744	0.168034
FBgn0047114	0.108008	0.056269
FBgn0005355	0.110383	0.0969839
FBgn0039150	0.163934	0.119603
FBgn0027512	0.413682	0.362672
FBgn0039153	0.121788	0.108749
FBgn0038679	0.0485858	0.1494
FBgn0038581	0.195724	0.155785
FBgn0027655	0.411589	0.490071
FBgn0013953	0	0
FBgn0285937	1.03585	1.13949
FBgn0038258	0.000785913	0.00873342
FBgn0004885	0.372199	0.374308
FBgn0053110	0.00141901	0
FBgn0038510	0.00351409	0.0066461
FBgn0037644	0.163338	0.127782
FBgn0039155	0.00687674	0
FBgn0039183	0.0550031	0.053692
FBgn0017577	0	0.00032714
FBgn0038811	0.114473	0.0534766
FBgn0267201	0.0148027	0.00983351
FBgn0024509	0.392516	0.336098
FBgn0053098	0	0.0010435
FBgn0051102	0.00142401	0
FBgn0010038	0.00258046	0
FBgn0038660	0.00420284	0.013853
FBgn0262146	0.0031214	0.00489253
FBgn0037535	0.288343	0.189723
RR48337-transposable-element	0.000717502	0.00161405
FBgn0015011	0	0.00404142
FBgn0051368	0.129689	0.153508
FBgn0039329	0.0965422	0.0999624
FBgn0037617	0.0867894	0.0953723
FBgn0039663	0.0409211	0.057114
FBgn0000024	2.06057	2.04646
FBti0059666	0.231122	0.263301
FBgn0045866	0.48383	0.395901
FBgn0038053	0.517874	0.357978
FBgn0266756	0.323415	0.428792
FBgn0037756	0.258075	0.196516
FBgn0051148	0	0.00163035
FBgn0037265	0.103385	0.0729351
FBgn0039326	0.00202901	0
FBgn0000303	0.308356	0.30578
FBgn0051342	0.310309	0.318737
FBti0019394	0.00157651	0.000777698
FBgn0037251	0.218727	0.178159
FBgn0262825	0.00312028	0.00515119
FBgn0039800	0.0329985	0.0448362
RR48385-transposable-element	0.0146057	0.00225573
FBgn0262801	0.446496	0.322217
FBgn0265376	0.216912	0.192989
FBgn0051365	0.13161	0.116118
FBgn0037788	0.0739396	0.144717
FBgn0000463	0.0937747	0.0854736
FBgn0011217	1.56071	1.59362
FBgn0038609	0.0533449	0.0479465
FBgn0039640	0.0152841	0.0172419
FBgn0039555	0.363991	0.279389
FBgn0038585	0.240276	0.136267
FBgn0083991	0.737253	0.78165
FBgn0051151	0.965326	1.03725
FBgn0039886	0.00159066	0.00266312
FBgn0037536	0.424292	0.47995
FBgn0038651	0.134952	0.190581
FBgn0039212	0.234398	0.234903
FBgn0265101	0.294709	0.207782
FBgn0051216	0.0483293	0.0399292
FBgn0051279	0	0.00255759
FBgn0044812	0.0220012	0.00631123
FBgn0038583	0.132213	0.145192
FBgn0039335	0.0503845	0.0403075
FBgn0039757	2.25053	1.93865
FBgn0039241	0.043297	0.0139619
FBgn0024432	0.701428	0.620899
FBgn0040571	0.177114	0.22687
FBgn0015331	0.123279	0.124911
FBgn0037482	0.210264	0.240876
FBgn0038948	0.135646	0.0935788
FBgn0039159	0.446608	0.342525
FBgn0286042	0.0263863	0.016245
FBgn0038425	0.127687	0.0935363
FBgn0039045	0.00255533	0
FBgn0040532	0.260016	0.422944
FBgn0038893	0.169132	0.145949
FBgn0022349	0.684611	0.64859
FBgn0038325	0.201516	0.156277
FBgn0038304	0.15345	0.116029
FBgn0038532	0.476058	0.501461
FBgn0039855	0.0147642	0.00482975
FBgn0037291	0.0134236	0.0130536
FBgn0013981	2.63018	2.21215
FBgn0037687	0.0383139	0.0209227
FBgn0013759	2.66914	2.68545
FBgn0038889	0.0665802	0.0649521
FBti0019334	0	0
FBgn0024555	0.891148	0.963628
FBti0020301	0.00488282	0.00799412
FBgn0261641	1.23472	1.27615
FBgn0039737	0.960399	0.669715
FBgn0086605	0.254629	0.19198
FBti0019288	0.00526562	0.0110223
RR48333-transposable-element	0.0106295	0.00652543
FBgn0022787	0.453841	0.493473
FBgn0039564	0.0187215	0.0142867
FBgn0027610	0.384295	0.378672
FBgn0038388	0.411782	0.355212
FBgn0266053	0.247996	0.288042
FBgn0038653	1.83635	1.95564
FBgn0037973	0	0.00323373
FBti0019439	0.0110666	0.00897596
FBgn0038084	0.295933	0.297429
FBgn0039756	0.00542045	0.00232931
FBgn0086371	0.233805	0.159692
FBgn0024321	0.809481	0.83111
FBgn0260243	0.153459	0.125282
FBgn0259740	0.128316	0.112006
FBgn0039227	0.184933	0.200658
FBgn0038665	0.0357646	0.12623
FBgn0038312	0.0414542	0.0324105
FBgn0040283	0.533125	0.563091
FBgn0015222	1.96793	1.73145
FBgn0013347	0.504117	0.450586
FBgn0038079	0.00123116	0.00195939
FBgn0037520	0.0060686	0.0033004
FBgn0037263	0.0130748	0.0110065
FBgn0051229	0.415097	0.376227
FBgn0038803	0.204012	0.254466
FBgn0038172	0.0416431	0.0282091
FBgn0085438	0.0158311	0.0125749
FBti0019356	0	0
FBgn0261984	0.328078	0.394428
FBgn0083975	1.40032	1.5696
FBgn0037627	0.00132585	0.00240669
FBgn0267742	0.00672108	0.0108442
FBgn0266252	0	0.00426693
FBgn0008646	0	0.000577948
FBgn0039282	0.735996	0.910177
FBgn0039017	0.0378773	0.0410418
FBgn0037879	0.0050381	0.00499542
FBgn0259938	0.704724	0.660223
FBgn0004597	0.130091	0.108893
FBgn0039637	0.225101	0.263655
FBgn0037589	0.0224921	0.0395992
FBgn0038872	0.527582	0.479474
FBgn0039273	0.0918564	0.0767365
FBgn0039116	0.412554	0.335464
FBgn0037503	0	0
FBgn0250755	0.0704698	0.0764826
FBgn0038596	0.463156	0.37445
FBgn0037989	0.478496	0.584527
FBgn0037713	0.0929402	0.0556432
FBgn0038686	0.215003	0.227925
FBgn0037778	0.028086	0.0332609
FBgn0051469	0.0143447	0.0119894
FBgn0037615	0	0
FBgn0027338	0.810518	0.846654
FBgn0263143	0.01279	0.0194168
FBgn0266705	0.0113289	0.0156533
FBgn0003884	2.15633	1.80513
FBgn0010433	0.0197898	0.00992795
FBgn0051051	0.376261	0.245644
FBgn0262483	1.98412	1.99172
FBgn0039600	1.09625	0.985325
FBgn0003339	0.00544641	0.013526
FBgn0051111	0.118709	0.11303
FBgn0250753	1.24546	1.1583
FBgn0038472	0.183046	0.169654
FBgn0266401	0.00162168	0.00426665
FBgn0001234	4.70291	4.73586
FBgn0265140	0.813226	0.813804
FBgn0038324	0.0481699	0.0411178
FBgn0015282	0.449078	0.382966
FBgn0037652	0.226018	0.144562
FBti0020294	0.0286925	0.0276664
FBgn0003308	0.00235917	0.000984333
FBgn0039294	0	0.00173251
FBgn0038282	1.87228	1.97528
FBgn0266801	1.81355	1.91881
FBgn0038608	0	0
FBgn0020407	0.048294	0.0364159
FBgn0039452	0.000642206	0
FBgn0028992	0.2267	0.194844
FBgn0003093	1.68718	1.75242
FBgn0037280	0	0
FBgn0039099	0.00983367	0.0160167
FBgn0038845	0.00179689	0.00207235
FBgn0038427	0.266637	0.27313
FBgn0038681	0	0.0166394
FBgn0039831	1.55873	1.62679
FBgn0039175	0.0926132	0.0669385
FBgn0027378	0.303765	0.212085
FBgn0038593	0.065881	0.0884204
FBgn0037960	0.0106319	0.00916241
FBgn0039115	0.247842	0.157828
FBgn0038327	0.113031	0.0683623
FBgn0261928	1.96958	2.08129
FBgn0003598	0.165003	0.179393
FBgn0037398	0	0.00278522
FBgn0010355	0.273836	0.34553
FBgn0010173	0.210744	0.172313
FBgn0039736	0.00124089	0
FBti0019304	0.00673504	0.0263532
FBgn0261808	0.240483	0.182663
FBti0020330	0.00146383	0
FBgn0040534	0.515739	0.467652
FBgn0037739	0.135859	0.0845377
FBgn0038353	0.0148733	0.00752389
FBgn0053202	1.23567	1.34158
FBti0019448	0.00288318	0.0141957
FBgn0039135	0.510479	0.671205
FBgn0265420	0.0200542	0.0624545
FBgn0039844	0.937305	1.09257
FBgn0266390	0.0121102	0.0341568
FBgn0037468	0.653841	0.51027
FBgn0038080	0.303659	0.162142
FBgn0051092	0.573426	0.585697
FBgn0010313	1.60116	1.65362
FBgn0038487	0.00934884	0.0103991
FBgn0042104	0.00204433	0.00127633
FBgn0011582	0.823014	0.951639
FBgn0040670	0.0288307	0.0353059
FBgn0037895	0.00627286	0.0100002
FBgn0069923	1.53538	1.38519
FBgn0051029	0.00191513	0.00727273
FBgn0040601	0.00697378	0
FBti0062536	0.00230719	0.00397259
FBgn0039678	0.00250774	0
FBgn0037638	0.0717359	0.0717448
FBti0019373	0.0151914	0.0155452
FBgn0039505	0.461831	0.358833
FBgn0039816	0.731782	0.77299
FBgn0250839	0.649054	0.510107
FBgn0039788	0.000827066	0.000439663
FBgn0028468	0.0124541	0.00766086
FBgn0039862	0.946917	0.974719
FBgn0003482	0.00121581	0.00361836
FBgn0038548	0.0603813	0.0788455
FBgn0013973	0.999322	0.994107
FBgn0037892	0.421894	0.332221
FBgn0086686	1.67865	1.88008
FBgn0051473	0.00265866	0.00630001
FBti0059723	0.00228851	0
FBgn0038598	0.0080148	0.00407918
FBgn0261049	0.135051	0.134379
FBgn0039337	0.241431	0.194273
FBgn0021750	0.0806337	0.0886369
FBgn0037686	2.12671	1.80798
FBti0019339	0.0112338	0.0141644
FBgn0038968	0.0521261	0.0456716
FBgn0263316	0.00430741	0.00325315
FBgn0039343	0.00170872	0
FBgn0038547	0.0924587	0.114998
FBgn0010812	0.12809	0.0985371
FBgn0259215	0.0106644	0.00264221
FBgn0085331	0.00398594	0.00761742
FBgn0037958	0.0254779	0.017883
FBgn0002733	0.00173834	0.00160548
FBgn0263626	0.00754968	0.00772166
FBgn0265164	0.0309953	0.0241178
FBgn0083969	0.397971	0.45296
FBti0059720	0.12169	0.0699032
FBgn0039525	0.151933	0.0838957
FBgn0285963	0.535367	0.596993
FBgn0266753	0.00297196	0.00969103
FBgn0028717	0.751851	0.766896
FBgn0038307	0.476314	0.371072
FBgn0051126	0.489113	0.332907
FBgn0037543	0.0945031	0.0607773
FBgn0262081	0.969241	1.04667
FBgn0262972	0.041261	0.230181
FBgn0037688	0.0767124	0.0474157
FBgn0027514	0.123534	0.120011
FBgn0051040	0.177177	0.201301
FBgn0037515	0.0242548	0.00133077
FBgn0267815	0	0.000314793
FBgn0011281	0.00323846	0.00503136
FBgn0037297	0.175642	0.137177
FBgn0266137	0.556975	0.5122
FBgn0051005	0.312421	0.286
FBgn0037473	0.151923	0.145898
FBgn0039380	1.58635	1.71137
FBgn0043005	0.0138118	0
FBgn0002941	0.0105447	0.00306081
FBgn0037810	0.19432	0.176775
FBgn0051223	0.0822542	0.069361
FBgn0039043	0.00189569	0.0010341
FBgn0260990	0.344663	0.329143
FBgn0037646	0.0395293	0.0352295
FBgn0003861	0	0.0132008
FBti0061864	0.00390911	0.00185495
FBgn0264839	0.00262098	0.00243996
FBgn0260742	0.565455	0.571721
FBgn0051248	0.0230348	0.0402296
FBgn0260462	0.510394	0.471712
FBgn0037312	0.263596	0.169797
FBti0062082	0.0375394	0.0300627
FBgn0037342	0.308953	0.209333
FBgn0261004	0.0283902	0.0372679
FBgn0027376	0	0.00855486
FBgn0004049	0.869678	0.778746
FBgn0039733	0.218042	0.204683
FBgn0039209	1.49129	1.5864
FBti0019469	0.065094	0.0174953
FBgn0267778	0.00859145	0.00542407
FBgn0038857	0.162213	0.124218
FBgn0037696	0.00187806	0.00566674
FBgn0265380	0.0025775	0.00391584
FBgn0037655	0.544291	0.487134
FBgn0264785	0.403178	0.385481
FBgn0038925	0.81603	0.613723
FBgn0267763	0.00142473	0.0014685
FBgn0015570	0.00152461	0.000463408
FBgn0038541	0.00146418	0.00489418
FBgn0038934	0.122355	0.13446
FBgn0000477	0.0892398	0.0170497
FBgn0038236	0.00238213	0.00996765
FBgn0004595	3.24695	3.51288
FBgn0261046	1.10783	1.20153
FBgn0062442	0.956437	0.75283
FBgn0038795	0.0199599	0.008601
FBgn0038984	0.727464	0.616988
FBti0019399	0.0115469	0.00162943
FBgn0039188	0.221666	0.138987
FBgn0037900	0.128396	0.102802
FBgn0000455	0.290409	0.178378
FBgn0038603	0.277288	0.230257
FBgn0038233	0.163057	0.212684
FBgn0039075	0.450327	0.383951
FBgn0287605	0	0.000962255
FBgn0039249	0.0600804	0.0855678
FBgn0265421	0.000800601	0.00407604
FBgn0038272	0.0859096	0.0919321
FBgn0038855	0.110271	0.0700924
FBgn0041605	3.98971	3.97072
FBgn0260487	0.00438536	0.00505174
FBgn0038194	0.0706693	0.00204391
FBgn0038039	0.156801	0.213396
FBgn0038316	0.27019	0.252562
FBgn0039730	0.367002	0.299599
FBti0019305	0.0325216	0.0558236
FBgn0038243	0.0806426	0.028179
FBgn0028646	0.2817	0.277974
FBgn0038662	0.426129	0.378461
FBgn0029176	0.547162	0.48786
FBgn0260386	0.00438909	0.00453627
FBgn0010051	0.367083	0.463844
FBti0148146	0.00312949	0.00605791
FBgn0037870	0.0770285	0.000481026
FBgn0037566	0.533057	0.432926
FBgn0037736	0.774977	0.807336
FBti0062444	0.0245715	0.0159533
FBgn0016693	0.320546	0.345691
FBgn0265190	0.0932333	0.083276
FBgn0261279	0.396109	0.4074
FBgn0263974	0	0.00299044
FBgn0004644	0	0
FBgn0039003	0.0953272	0.0643814
FBgn0038166	0.1227	0.0953894
FBgn0085405	0.168117	0.162425
FBgn0037238	1.42546	1.26005
FBgn0051041	0.00838203	0.00687649
FBgn0004237	0.797864	0.698918
FBgn0085376	0.42717	0.399129
FBgn0259823	0.702936	0.761009
FBgn0051036	0	0.00387165
FBgn0037643	0.908211	0.793447
FBgn0265048	0.0174936	0.000802788
FBgn0037262	0.511448	0.443147
FBgn0004882	0.394355	0.424617
FBgn0264075	0.205505	0.196524
FBgn0038705	0.0019896	0.0115041
FBgn0025456	0.0398779	0.0225077
FBgn0039628	0.0126439	0.00599767
FBgn0085412	1.29341	1.31663
FBgn0037293	0.134496	0.157584
FBgn0263782	0.222872	0.138788
FBgn0027109	0.0205009	0.0107917
FBgn0267570	0.107481	0.117388
FBgn0085431	0	0.0033494
FBgn0052855	0.00130091	0.00915612
FBgn0000071	0	0.00145835
FBgn0046114	0.326374	0.24891
FBgn0038326	0.300823	0.192719
FBgn0026257	0.0180909	0.0360756
FBgn0037931	0.149799	0.12869
FBgn0023495	0	0
FBgn0267229	0.0232723	0.0297284
FBgn0287209	0.0514541	0.00226334
FBgn0261638	0	0
FBgn0037758	0.170151	0.276147
FBti0019438	0	0.000275674
FBgn0038818	0.0128927	0.0119558
FBgn0037378	0.238528	0.155485
FBgn0039342	0	0
FBgn0039612	0.0114804	0.0157503
FBgn0015790	0.85213	0.87401
FBgn0039631	0.100292	0.0830459
FBgn0039178	0.00942398	0.0211624
FBgn0264986	0.00532041	0.0055878
FBgn0085433	0.712961	0.696649
FBgn0037702	0.495575	0.499317
FBgn0037924	0.148941	0.117486
FBgn0027579	0.0804129	0.0514436
FBgn0086362	0.138724	0.119493
FBgn0038295	0.252395	0.364119
FBgn0029170	0	0.00629251
FBgn0261086	0.379277	0.401422
FBgn0037814	0.163845	0.121622
FBgn0037922	0.171898	0.110064
FBgn0016672	0.790418	0.634864
FBgn0028475	0.201806	0.202792
FBgn0263231	1.49339	1.52441
FBgn0001180	0.0336972	0.0576048
FBgn0051272	0	0
FBgn0037440	0.0431026	0.02364
FBgn0045473	0.00220425	0.000851796
FBgn0039616	0	0.00804609
FBgn0037317	0.279475	0.211155
FBgn0039673	0.00696535	0.00672197
FBgn0013812	0	0.00351173
[truncated: 14,074 more rows]

## Sheet: Pm1-Pm3
geneID	control_normalizedReadsCounts	tau P251L KI_normalizedReadsCounts
FBgn0250732	0.157231	0.180246
FBgn0037409	0.00474531	0.00761481
FBgn0027948	0.799665	0.85119
FBgn0038675	0.326327	0.293675
FBgn0000500	0	0.0343244
FBgn0037610	0.108124	0.0695515
FBgn0267571	0.306241	0.27803
FBgn0261859	0.875974	0.909567
FBgn0037363	1.15748	1.15023
FBgn0039552	0.0107378	0.0146239
FBgn0039732	0.149479	0.0985005
FBgn0038224	1.48131	1.29342
FBgn0264776	0.0195819	0.0057027
FBgn0038525	0.00163539	0
FBgn0261436	0.102098	0.0644101
FBgn0038814	0.0477531	0.0164123
FBgn0286871	0.00421803	0.00294205
FBgn0038279	0.00212344	0.00360245
FBgn0037625	0.617972	0.530057
FBti0019436	0.0285617	0.0170574
FBgn0027574	0.176906	0.189497
FBgn0260746	0	0
FBgn0037930	0.202471	0.229304
FBgn0027095	0.38766	0.365653
FBgn0051450	0.532843	0.39291
FBgn0037794	0.21686	0.213615
FBgn0039229	1.38033	1.37925
FBti0019348	0.0205078	0
FBgn0038737	0.0933455	0.0621575
FBti0019411	0.0260012	0.0132441
FBti0020393	0.0202351	0.0109508
FBgn0039291	0.0414244	0.045295
FBgn0037547	0.0162919	0.00577141
FBgn0038966	0.0153158	0.0400679
FBgn0037690	0.427059	0.394453
FBti0019321	0.0118484	0.000589923
FBgn0038055	0.312677	0.293105
FBgn0261792	0.152195	0.100098
FBgn0040606	0	0.0056491
FBgn0037709	0.00940324	0.0137046
FBti0062552	0.0858696	0.0651734
FBgn0037777	0.244971	0.139975
FBgn0046685	0.00934372	0.00439216
FBgn0039313	0.0039894	0.0241378
FBgn0004395	1.13217	1.25997
FBgn0266674	0.099224	0.0791708
FBgn0039019	0.119401	0.125423
FBgn0039172	0.291753	0.263931
RR46358-transposable-element	0.5807	0.554741
FBgn0011290	0.60814	0.552481
FBgn0267816	0.00249484	0.00170109
FBgn0037747	0.640518	0.55209
FBgn0039073	0.00942337	0.00289995
FBgn0040256	0.00298106	0.001536
FBgn0039404	0.178763	0.128579
FBgn0005674	0.0970963	0.117566
FBgn0011768	0.0710488	0.043555
FBgn0037917	0.407665	0.452276
FBgn0086365	0.0453141	0.0504837
FBgn0017567	0.926094	0.730046
FBgn0039290	0.196911	0.188033
FBti0019361	0.00400266	0.00239266
FBgn0051287	0.00261706	0.00685206
FBgn0038577	0.0902225	0.0465378
FBgn0037720	0.0039204	0.0454457
FBgn0001112	0.00722408	0.00577781
FBgn0038344	0.102649	0.066658
FBgn0037678	0.0472264	0.0415485
FBgn0267709	0.00107987	0.00175453
RR48352-transposable-element	0.0307912	0.0198538
FBgn0051072	0.576358	0.614862
FBgn0013277	0.170567	0.00856982
FBgn0037718	0.140662	0.146474
FBgn0286071	0.000578397	0
FBgn0265197	0.0391203	0.0431499
FBgn0003002	0.00425254	0.0259224
FBgn0041588	0.180478	0.126972
FBgn0039557	0.155232	0.13864
FBti0020309	0.00229275	0.0019834
FBgn0051028	0.00204954	0.00211433
FBgn0266598	0.0245324	0.00803928
FBgn0038725	0.738284	0.619381
FBgn0263757	0	0
FBgn0039277	0.445519	0.42816
FBgn0039302	0.319864	0.403326
FBgn0039461	0.319943	0.254774
FBgn0037894	0.0705769	0.0422972
FBgn0039817	0.00459351	0.00107651
FBgn0051224	0.771065	0.851419
FBgn0054008	0.00243739	0.0072309
FBgn0013276	2.12176	2.36688
FBgn0039714	0.264884	0.264784
FBgn0037802	0.0484157	0.030793
FBgn0039328	0	0.00319213
FBgn0051116	0.00428586	0.0305732
FBgn0266672	0.263263	0.255848
FBgn0037292	0.00600657	0.00722051
FBgn0017550	0.719158	0.781935
FBgn0037679	0.217145	0.244264
FBgn0040609	0	0.00128304
FBgn0038113	0.00353493	0.00126478
FBgn0014931	0	0.000456584
FBgn0267408	0	0
FBgn0038115	0.0142732	0.00332647
FBgn0038745	0.424658	0.467459
FBgn0038321	0.114058	0.175954
FBgn0263594	1.14522	1.18878
FBgn0083984	0.152311	0.110078
FBgn0015568	0.00437619	0.0033505
FBgn0038881	1.93666	1.88834
FBgn0259139	1.26834	1.09252
FBgn0039258	0.0686703	0.0513337
FBgn0039415	0.000937926	0.0193818
FBgn0264427	0.10264	0.111355
FBgn0004841	0.167617	0.192866
FBgn0275433	0	0.0060581
FBti0019345	0.00261833	0.00233153
FBgn0002924	0.0219564	0.031931
FBgn0051211	1.14363	1.01531
FBgn0267612	0.012473	0.00777186
FBgn0037993	0.393259	0.350301
FBgn0262962	0.0555774	0.0357765
FBgn0038049	0.306076	0.255102
FBgn0005777	0.185417	0.198921
FBgn0261238	0.679743	0.680475
FBgn0037891	0.857184	0.705994
FBgn0039182	0.154461	0.155612
FBgn0085345	0.00223076	0.0025796
FBgn0085383	1.31685	1.33013
FBgn0040080	0.199532	0.211375
FBgn0037383	0.0731668	0.0397412
FBgn0037779	0	0.00415276
FBgn0000533	0.0103501	0.00479761
FBgn0263025	0.0465951	0.041294
FBgn0264291	0.0843082	0.0502766
FBti0019286	0.0137976	0.0196504
FBgn0010340	0.132484	0.0813044
FBgn0039722	0	0.00135177
FBgn0038490	0.111586	0.0715975
FBgn0265276	1.57987	1.66266
FBgn0014930	0.134193	0.0886442
FBgn0038809	0.459857	0.433132
FBgn0038678	0.636515	0.485376
FBgn0037478	0.164803	0.114056
FBgn0038428	0.272356	0.208357
FBgn0038853	1.73509	1.74283
FBgn0038306	0.060114	0.0711452
FBgn0046876	0.00765952	0
FBgn0051320	0.0941112	0.111145
FBgn0051184	0.0910547	0.0705535
FBgn0037276	0.00153722	0.0016692
FBgn0039870	0.10943	0.103022
FBgn0003165	2.8929	2.7856
FBgn0039463	0.0126502	0.00164068
FBgn0038760	0.0800036	0.0830717
FBgn0002781	0.928054	0.859892
FBgn0039311	0.00609093	0.0127913
FBgn0038034	0.034108	0.0270004
FBgn0053970	0.00133558	0.000506003
FBgn0038332	0.109993	0.153866
FBgn0024957	0.293122	0.232691
FBgn0023212	0.342356	0.337146
FBti0061713	0	0.00246014
FBgn0027492	2.09736	2.16018
FBgn0011289	0.319251	0.265746
FBti0019404	0.00077939	0
FBgn0015269	0.899317	0.987401
FBgn0010399	0.755377	0.734698
FBgn0266750	0.717254	0.599819
FBgn0039054	1.60766	1.70979
FBgn0286828	0.150711	0.135794
FBgn0028734	0.799099	0.852647
FBgn0039789	0.000816936	0.000861189
FBgn0037849	0.322134	0.391631
FBgn0011766	1.16074	1.18119
FBgn0267430	0.0566887	0.0551996
FBti0020308	0	0.00160344
FBgn0051510	0.489694	0.39797
FBti0019447	0.0119233	0.0155897
FBgn0038535	1.00095	1.04306
FBgn0260444	0.270049	0.171183
FBgn0038437	0.185098	0.124896
FBgn0038369	0.378901	0.225029
FBti0019461	0.304236	0.282114
FBgn0262904	0	0.0075475
FBgn0263047	0.0267439	0.0234384
FBgn0011785	0.349662	0.350992
FBgn0037705	1.6341	1.71356
FBgn0038454	0.172491	0.190673
FBgn0260743	0.68941	0.578003
FBgn0039879	0	0.00104739
FBgn0267116	0.00386071	0.00312475
FBgn0039820	0.00752933	0.00473857
FBgn0067629	0.0571309	0.0482831
FBgn0017590	1.88932	1.84273
FBgn0039726	0.143321	0.0970918
FBgn0260634	1.13808	1.20996
FBgn0037231	0.784711	0.755874
FBgn0267685	0.036288	0.0194037
FBgn0037817	0.00239689	0.00494432
FBgn0262858	0.563201	0.47168
FBgn0004876	1.25841	1.21761
FBgn0039685	0.00277873	0.0286603
FBgn0004117	0.0277106	0.0205488
FBgn0037811	0.0140426	0.0104721
FBgn0038354	0.0251355	0.016137
FBgn0037834	0.139626	0.111544
FBgn0003248	0	0.122915
FBgn0000723	0.0644645	0.0729213
FBgn0051030	1.50344	1.46466
FBgn0038199	0	0.0442554
FBgn0037313	0.588956	0.571923
FBgn0037890	0.72689	0.546545
FBgn0039350	0.679892	0.659585
FBgn0037546	0.612558	0.750022
FBgn0015781	0.304027	0.198342
FBgn0002522	0.00286647	0.00352365
FBgn0037737	0.572851	0.554702
FBgn0051551	0.00131113	0.00774177
FBgn0051514	0	0
FBti0019380	0.123272	0.0535576
FBgn0039215	0.231522	0.250644
FBgn0264901	0.134596	0.10483
FBgn0037943	0.199285	0.20538
FBgn0038478	0.466733	0.431648
FBgn0028684	0.255493	0.228818
FBgn0051195	0.115515	0.129809
FBgn0028487	0.1982	0.177024
FBgn0002719	0.472334	0.508526
FBgn0027841	0.0880522	0.0687693
FBgn0261479	0.130457	0.109047
FBgn0039696	0.126916	0.104475
FBgn0038331	0.537914	0.478098
FBgn0051202	0.0021813	0.000236462
FBgn0267118	0.00477794	0.0103576
FBgn0039261	0.510739	0.550993
FBgn0266744	0.0051546	0.0213573
FBgn0267337	0.470957	0.450773
FBgn0037746	0.00625043	0.0145793
FBgn0038854	0.0744329	0.0762825
FBgn0267200	0.00452299	0.00139299
FBgn0037656	0.0578038	0.035744
FBgn0037700	0.277768	0.179531
FBgn0038839	1.23664	1.51727
FBgn0037466	0.784133	0.757123
FBti0019320	0.00259877	0.00104869
FBgn0039101	0	0.00862542
FBgn0011655	0.424433	0.400226
FBgn0039274	0.0523286	0.0268652
FBgn0039731	0.0205241	0.0317216
FBti0019466	0.00660582	0.0144932
FBgn0039250	0.00197634	0.00702093
FBgn0015513	0.164899	0.235227
FBgn0017581	2.50492	2.61646
FBgn0020249	0.361622	0.361946
FBgn0040600	0.00602246	0.125961
FBgn0024329	0.28072	0.26999
FBgn0004842	0.0378317	0.0358315
FBgn0039465	1.2209	1.26615
FBgn0013343	2.88829	2.88047
FBgn0002940	0	0.00103387
FBgn0027873	0.0654954	0.0706169
FBgn0038197	0.0319613	0.0585833
FBgn0039346	0.674875	0.549209
FBgn0266372	0.000870024	0.00263149
FBgn0038952	0.0648694	0.0828857
FBgn0000139	0.190926	0.130473
FBgn0020238	2.70513	2.74113
FBgn0038476	0.35704	0.410625
FBgn0039341	0.0910802	0.0397324
FBgn0037850	0.0242465	0.0258973
FBgn0037908	0.382544	0.303113
FBgn0037270	1.02067	0.815416
FBgn0038540	0.399103	0.256144
FBgn0038965	0.294188	0.234928
FBgn0039609	0.0129916	0.00684892
FBgn0003268	0.0253302	0.0371283
FBgn0260935	0.136785	0.170495
FBgn0026566	0.398996	0.251027
FBgn0266700	0.0263287	0.0364544
FBgn0037540	0.058381	0.0334976
FBgn0039703	0	0
FBgn0039529	0.001654	0.00249772
FBgn0044871	0.182282	0.173012
FBgn0039674	0.510892	0.495695
FBgn0051522	0.652955	0.740515
FBgn0283535	1.91464	1.85999
FBgn0023083	0.367274	0.371998
FBgn0037902	0.44989	0.390259
FBgn0051133	0.044235	0.0280623
FBgn0004107	0.0924527	0.0771455
FBti0063150	0.0201739	0.0139367
FBgn0250823	1.83853	1.85065
FBgn0037950	0.0366475	0.0436707
FBgn0037714	0.00254534	0.00516127
RR48301-transposable-element	0.00527481	0.00672442
FBgn0037844	0.0190669	0.016208
FBgn0267199	0.00209737	0.00396023
FBgn0037883	0.160944	0.110944
FBgn0039877	0.00418212	0.00918421
FBgn0038206	0.153688	0.165654
FBti0059759	0.00958933	0.0381067
FBgn0039764	0.224898	0.253175
FBgn0038402	0.0540868	0.0355599
FBgn0039286	0.199076	0.171533
FBgn0038183	0.112011	0.0735255
FBgn0038412	0.000895287	0.000833684
FBgn0038806	0.292524	0.190098
FBgn0022943	0.296503	0.179198
FBgn0005585	1.07317	0.839688
FBgn0040212	0.207074	0.260828
FBgn0053189	0.00390708	0.00132454
FBgn0040551	0	0.00347333
FBgn0261885	1.54888	1.66049
FBgn0039494	0.0429411	0.0336625
FBgn0037955	0.15464	0.140433
FBgn0011701	0.00417763	0.018763
FBgn0086253	0.0233076	0.0147776
FBgn0038498	1.5245	1.54436
FBti0020312	0.00249484	0.00174658
FBti0019299	0.0316615	0.0506716
FBgn0038592	0.0671497	0.0615244
FBgn0063127	0.00316023	0.00683823
FBgn0038257	0	0.00879155
FBgn0263453	0.00612621	0.00269198
FBgn0264841	0	0.000609732
FBgn0015240	0.176223	0.159741
FBgn0261261	0.849865	0.879552
FBgn0039109	0.175223	0.142166
FBgn0027563	0.025153	0.00975238
FBgn0004387	0.816516	0.792036
FBgn0265068	0.0118285	0.00247204
FBgn0038195	0.736846	0.664299
FBgn0262477	2.05901	1.84011
FBgn0039543	0.0744201	0.0561105
FBgn0020018	0.0464593	0.034273
FBgn0267435	0.00578001	0.00130399
FBgn0014366	0.0913295	0.0655128
FBgn0037305	0.180794	0.139707
FBgn0037670	0.130372	0.15418
FBgn0037923	0.0534931	0.0517697
FBgn0264912	0.00293817	0.00503329
FBgn0037708	0.0811594	0.0679385
FBgn0038589	0.0176208	0.0168566
FBgn0040078	0.0975624	0.0745325
FBgn0038165	1.23938	1.17035
FBgn0037668	0.00309112	0.00328396
FBgn0266717	0.874133	0.946337
FBgn0039026	1.16727	1.23804
FBgn0039332	0.0182334	0.0768461
FBgn0039635	0.838193	0.718348
RR48332-transposable-element	0.00200926	0
FBgn0038029	0	0.000476782
FBgn0038755	0.425793	0.566617
FBgn0260440	0.0309132	0.0127736
FBgn0038744	0	0.00547215
FBgn0026315	0	0.00181293
FBgn0003651	0.715112	0.670105
FBti0019396	0.0765187	0.464407
FBgn0085391	2.3918	2.50955
FBgn0038170	0.00426307	0.0211917
FBgn0005649	0.945494	0.9512
FBti0062875	0.00732472	0.00712297
FBgn0039536	1.27373	1.21964
FBgn0262559	1.14647	0.954652
FBgn0037326	0.849032	0.870672
FBti0020313	0.0291478	0.0258849
FBgn0037377	0.135841	0.1212
FBti0063296	0.00152898	0.00661247
FBgn0037743	0.199328	0.192159
FBgn0267702	0.00524029	0.00258435
FBgn0039431	0.936047	1.07152
FBgn0038475	0.144549	0.119025
FBgn0263117	0.0752698	0.0554986
FBgn0039240	0.81916	0.849664
FBti0020323	0.0171195	0.0156284
FBgn0037815	0.0436296	0.0270265
FBgn0265422	0.0451455	0.0303642
FBti0019405	0.0132638	0.0100617
FBgn0039804	0.000778397	0.0137377
FBgn0086134	0.374178	0.246301
FBgn0027570	0.0231568	0.0285226
FBgn0037933	0.419237	0.326268
FBgn0037299	0.223068	0.149841
FBgn0037912	0.0205367	0.0257572
FBgn0037279	0.194479	0.224474
FBgn0038145	0.964002	0.907925
FBgn0053293	0.00318534	0.00118964
FBgn0038740	0.32593	0.480113
FBgn0001297	0.620865	0.873985
FBgn0028968	0.325138	0.272695
FBgn0013767	0.00195394	0.00102296
FBgn0040582	0.0266042	0.0141079
FBgn0038390	0.0046831	0.00672686
FBgn0264827	0.00310048	0
FBgn0003512	0.208246	0.149509
FBgn0024909	0.219909	0.223871
FBgn0262983	0.00415957	0.0018947
FBgn0038450	0.0148599	0
FBgn0038866	0.0442953	0.0426873
FBti0019297	0.000565328	0.000912244
FBti0019431	0.0282761	0.00981584
FBgn0038894	0.0102198	0.00363004
FBgn0039876	0.095184	0.0903829
FBgn0022344	0.428666	0.332298
FBgn0038989	0.109675	0.0840928
FBgn0026441	0.510664	0.557681
FBgn0038980	0.806747	0.84988
FBgn0016119	1.77967	1.47914
FBgn0267753	0.00523758	0.00669777
FBgn0010770	0.125979	0.0869917
FBgn0038196	0.303881	0.37069
FBgn0016650	0.0338553	0.0398263
FBti0061737	0.0126139	0.0132043
FBgn0037354	0.13969	0.129416
FBgn0038461	0.142489	0.16971
FBgn0000246	0.138989	0.117981
FBgn0038139	0.0281901	0.0461493
FBgn0039830	2.56272	2.3426
FBgn0037848	0.330478	0.355353
FBgn0038870	0.079631	0.0939571
FBgn0086768	0.39904	0.305962
FBgn0039403	0.0130228	0.0153558
FBgn0285925	2.52055	2.60452
FBgn0063649	0.604984	0.577275
FBgn0038286	0.999438	1.10395
FBgn0027494	0.00127852	0.00380251
FBgn0039272	0.0404504	0.0319892
FBgn0040682	0.00323146	0.00957624
FBgn0039232	0.0051603	0.0809441
FBgn0003480	0.0113134	0.00891659
FBgn0039734	0.389043	0.356344
FBgn0051388	0.199186	0.157766
FBgn0264816	0.0684535	0.0757404
FBgn0038303	0.159178	0.136835
FBgn0051441	0.0461898	0.0377736
FBgn0038652	0.00672417	0.0107105
FBgn0039611	0.009792	0.00848424
FBgn0000447	0.231657	0.158384
FBgn0039300	2.24095	1.83292
FBgn0263022	0.00655326	0.00574298
FBgn0039022	0	0.00425331
FBgn0039098	0.00280683	0.00703873
FBgn0039626	0.237531	0.193287
FBgn0010768	0.315515	0.286019
FBgn0039848	0.00933338	0.00291421
FBti0019296	0.0278085	0.0282729
FBgn0085308	0.0190922	0.0312694
FBgn0037602	0.0833509	0.0491634
FBgn0039690	0.185318	0.184886
FBgn0015402	0.134924	0.150708
FBgn0002773	0.007211	0.00251423
FBgn0026634	0.10064	0.107827
FBgn0051217	0.0393819	0
FBgn0039379	0.15787	0.152062
FBgn0038361	0.00645493	0.00295589
FBgn0262127	0.281441	0.349834
FBgn0051019	0.000959748	0
FBgn0001321	0.00673426	0.019044
FBti0019398	0.0101478	0.00323063
FBgn0025781	0.046523	0.042841
FBgn0038275	0.223092	0.137064
FBgn0039254	0.263232	0.228034
FBti0019337	0.0160051	0.0111856
FBgn0039265	0.256273	0.145713
FBgn0038697	0	0.000547397
FBgn0263738	0.0236854	0.00352777
FBgn0037680	0.175665	0.151369
FBgn0243511	0.184724	0.215328
FBgn0039682	0.022912	0.05355
FBgn0020385	0.0199073	0.0208256
FBgn0000036	1.8525	1.97839
FBgn0038313	0.133778	0.105709
FBgn0267680	0.000702933	0.000623368
FBgn0039104	0	0
FBgn0038914	0.0084351	0
FBgn0260745	0.0127338	0.00626171
FBgn0038828	0.57795	0.434679
FBgn0037773	0.0518096	0.0570726
FBti0019468	0.00850615	0.00300246
FBgn0038642	0.00133558	0.0013313
FBgn0083950	1.6263	1.80843
FBti0020328	0.0637444	0.0694073
FBgn0000247	0.326172	0.259362
FBti0019429	0.0151645	0.00968571
FBgn0028374	0.00110377	0.0195518
FBgn0266408	0.00251882	0.00352294
FBgn0038619	0.151414	0.0877563
FBgn0038976	0.338711	0.297881
FBgn0043884	1.33995	1.48066
FBgn0038957	0.16893	0.11769
FBgn0267801	0.0180324	0.00914026
FBgn0038247	0.00136729	0.00135235
FBgn0037213	0	0.00270415
FBgn0038827	0.00800982	0.0189576
FBgn0243512	0.967786	1.08294
FBgn0085320	0.0036545	0.000962343
FBgn0020626	0.242369	0.186603
FBgn0054027	0.00758143	0.0214719
FBgn0038108	0.769275	0.713872
RR48372-transposable-element	0.0152579	0.00391057
FBgn0266418	0.577909	0.683401
FBgn0039315	0.00803954	0.0123829
FBgn0267385	1.57287	1.35935
FBgn0037443	0.972749	0.898945
FBgn0038747	0.172582	0.210118
FBgn0039638	0.0125555	0.0101672
FBgn0004901	0.00554892	0.00537204
FBgn0038376	0.26883	0.239186
FBgn0038380	0.00908336	0.0132525
FBgn0039705	0.133424	0.121779
FBgn0038057	0.070056	0.0418545
FBgn0023097	0.612979	0.63489
FBgn0083986	0.479195	0.290965
FBgn0037376	0.175668	0.155212
FBgn0037249	0.544528	0.526691
FBgn0039531	0.100271	0.095036
FBgn0039883	1.87911	1.99385
FBti0019407	0.0137184	0.0391619
FBgn0039767	0.235133	0.226482
FBgn0264491	0.0126117	0.0185447
FBgn0266730	0.02287	0.0138868
FBgn0002354	0.338459	0.286096
FBgn0038143	1.51229	1.5382
FBgn0263755	0.0319244	0.0224449
FBti0020386	0.00421969	0.0108868
FBgn0001139	1.12907	1.10284
FBgn0041710	0.00247864	0.000432695
FBgn0045862	0.223612	0.242284
FBgn0039064	2.09742	2.30101
FBgn0038638	0.0299289	0.0186672
FBgn0085382	0.887147	1.03204
FBgn0039048	0.00856217	0.00830554
FBgn0005632	0.874943	0.964236
FBgn0037439	0.0835898	0.101603
FBgn0085413	1.59065	1.7182
FBgn0039491	0.00182073	0.00394214
FBgn0039413	0.0190775	0.0213283
FBgn0087013	0.416942	0.398701
FBgn0039509	0.219092	0.210943
FBgn0014342	0.0567266	0.0482911
FBgn0038607	0.00103386	0.00201239
FBgn0023178	0.0034825	0
FBgn0051161	0.057135	0.0516067
FBgn0037489	0.191137	0.188148
FBgn0037624	0.429751	0.392543
FBgn0039835	0.212982	0.151742
FBgn0259227	0.0638242	0.0467205
FBgn0051361	1.05593	0.990933
FBgn0037722	0.0587321	0.0531421
FBgn0038865	0.00913699	0
FBgn0039854	0.304424	0.293754
FBgn0266413	0.00124362	0.0108862
FBgn0261575	0.00810489	0.00402284
FBgn0039861	0.424742	0.361733
FBgn0038460	0.00174576	0.0038455
FBgn0026562	0.028707	0.00138886
FBgn0001230	2.42884	2.43524
FBgn0010438	0.153471	0.134449
RR48405-transposable-element	0.0385376	0.0535347
FBgn0015279	0.362809	0.432561
FBgn0038149	0.00333057	0.00302018
FBgn0039233	0.0909197	0.078357
FBgn0000015	0.00443111	0.0180568
FBgn0039622	0.00906307	0.000371829
FBgn0261550	1.59252	1.42435
FBgn0037382	0.136774	0.118488
FBgn0037573	0.226783	0.168617
FBti0019414	0.0383363	0.0172712
FBgn0016691	1.41561	1.08886
FBgn0051191	0.401183	0.467527
FBgn0038343	0.0179227	0.0194294
FBgn0264694	0.342034	0.277681
FBgn0083985	0.0440769	0.0218679
FBgn0039023	0.00922208	0.00463469
FBgn0263979	0.274746	0.236414
FBgn0038037	0.00227032	0.0137125
FBgn0039554	0.20933	0.157949
FBgn0038071	0.00139931	0.00211887
FBgn0027539	0.139579	0.157182
FBgn0051221	2.06435	2.32959
FBgn0002921	4.03993	4.15997
FBgn0267764	0.0201311	0.0121426
FBti0019445	0.00655992	0.000967245
FBgn0039711	0.0288757	0.0199759
FBgn0001215	1.29954	1.20348
FBgn0265351	0.0210878	0.01308
FBgn0038268	0.156107	0.132333
FBgn0037698	1.95047	1.92835
FBgn0039299	0.00116529	0
FBgn0027608	1.60742	1.6379
FBgn0025808	0.0648362	0.0666571
FBgn0038981	0.00194932	0
FBgn0039338	0.633737	0.705795
FBgn0285955	0.0517464	0.038691
FBgn0261995	0.359089	0.289706
FBgn0038716	0.00284344	0.00163566
FBgn0039538	0.0435339	0.0490664
FBgn0039360	0.091924	0.125907
FBgn0026314	0	0.00559732
FBgn0264902	0.0123821	0.00848037
FBgn0038092	0.534635	0.360626
FBgn0011474	0.473668	0.464566
FBgn0261649	0.913113	0.874035
FBgn0037537	0.00171631	0.00663035
FBgn0038975	2.15633	2.16825
FBti0059740	0.0011475	0.00511987
FBgn0039163	0.317689	0.236563
FBgn0003257	0.0340744	0.064305
FBgn0263390	0.003537	0.00672408
FBgn0061476	0	0.00382589
FBgn0267233	0.00758873	0.00994774
FBgn0038330	0.453298	0.357825
FBgn0267443	0.00456474	0.0045695
FBgn0267781	0.00339724	0.00242224
FBgn0260463	0.00265026	0.000440453
FBgn0039396	0.214531	0.209567
FBgn0051523	0.219731	0.226838
FBgn0044826	0.602859	0.698066
FBgn0037981	0.180003	0.151017
FBgn0037433	0.0232739	0.00434097
FBgn0039562	0.352781	0.31771
FBgn0040259	0.00849146	0.00130632
FBgn0039836	0.0472044	0.0450503
FBgn0019624	1.83379	1.51283
FBgn0038849	0.00816671	0.000613539
FBgn0037338	0.0775061	0.0707636
FBgn0028688	0.16683	0.14848
FBgn0038144	0.00266712	0.00511404
FBgn0283468	0.691817	0.733212
FBgn0039802	0.540726	0.386383
FBgn0287225	0.27406	0.198308
FBgn0040493	0.0761795	0.0551939
FBti0059798	0.134115	0.071909
FBgn0016685	0.473059	0.391827
FBgn0039136	0.20456	0.385537
FBgn0037446	0.347803	0.320637
FBgn0038721	0.193791	0.186638
FBgn0011672	0.174629	0.159644
FBti0019422	0.0512413	0.178231
FBgn0039697	0.120279	0.060724
FBgn0027518	0.0783446	0.0565484
FBgn0037873	1.2544	0.982952
FBgn0039713	2.22617	1.84281
FBgn0039602	0.323352	0.327608
FBgn0039067	0.0771991	0.0936441
FBgn0039589	0.145239	0.115579
FBgn0037760	0.754554	0.895722
FBgn0039118	0.00883083	0.0148667
FBgn0038063	1.88733	1.81024
FBgn0039349	0.961878	0.852611
FBgn0039483	0	0
FBgn0037896	0	0.00433119
FBgn0267799	0.00928276	0.00425736
FBgn0038569	0.161888	0.165216
FBgn0013813	0.00590097	0.00225194
FBgn0038546	0.388873	0.327956
FBgn0037621	0.223024	0.169866
FBgn0002937	0	0.00954511
FBgn0003169	0.554217	0.581681
FBgn0004897	0.00892429	0.00209962
FBgn0037780	0.270035	0.195993
FBgn0262582	1.95217	2.02767
FBgn0038741	0.0434241	0.0559333
FBgn0051207	0	0
FBgn0025879	0.00434814	0.0423121
FBgn0040253	0.00340789	0
FBgn0085384	0.274983	0.376261
FBgn0027562	0.00075622	0
FBgn0039594	0.00260914	0.00284244
FBgn0037324	0.0112808	0.0148538
FBgn0038234	0.226926	0.204395
FBgn0039197	0.00233192	0
FBgn0019925	0.4712	0.395785
FBgn0037611	0.0911223	0.0689667
FBgn0266599	1.59472	1.526
FBgn0039065	0.283154	0.249504
FBgn0038765	0.0379094	0.036033
FBgn0038584	0.0348978	0.0367043
FBgn0039687	0.0260014	0.0176916
FBgn0037885	0.0580293	0.0689952
FBti0019372	0.0109568	0.00241844
FBgn0266268	0.20777	0.161688
FBgn0040623	0.439266	0.285364
FBgn0051176	0.0591087	0.0526012
FBgn0051477	0.00352189	0
FBgn0039204	0.278153	0.208381
FBgn0038179	0	0
FBgn0038588	0.114594	0.144492
FBgn0037574	0.104307	0.0656618
FBgn0038878	0	0.000745041
FBgn0026576	0.246024	0.241707
FBgn0266916	0.0353686	0.0949389
FBgn0039305	0.21411	0.13579
FBgn0038014	0	0.00293324
FBgn0250910	1.00487	0.891733
FBgn0265274	0.00691167	0.0539767
FBgn0263413	1.28651	1.20972
FBgn0037618	0	0
FBgn0038156	0.897032	0.920383
FBgn0267766	0.00246057	0.00290686
FBgn0026417	0.0315534	0.0215891
FBgn0038028	0	0
FBgn0001197	0.941495	0.782848
FBgn0013278	0.555484	0.530544
FBgn0039376	0.00567087	0
FBgn0024558	0.192065	0.122093
FBgn0039875	0.330225	0.276749
FBgn0037556	0.445318	0.450824
FBgn0041707	2.31019	2.25278
FBgn0037225	0.128026	0.100969
FBgn0004510	0.113899	0.0617117
FBgn0051140	2.11086	2.2384
FBgn0266697	0.0299897	0.0147919
FBgn0025571	0.651579	0.570075
FBti0062854	0	0.00309102
FBgn0039347	0.448075	0.418944
FBgn0086704	0.0225597	0.0269511
FBgn0037391	0.728376	0.547303
FBgn0038829	0.243598	0.210597
FBgn0000454	0.101814	0.0478901
FBgn0039348	0.220317	0.203877
RR48349-transposable-element	0.0489482	0.0233177
FBgn0037215	0.000733329	0.00723281
FBgn0037538	0.13395	0.0996927
FBti0020385	0.00818768	0.0254705
FBgn0037999	0.00826508	0.00170588
FBgn0027657	0.117219	0.133876
FBgn0038909	0.0179336	0.0049208
FBgn0038127	0.0160374	0.00709771
FBgn0053207	0.486037	0.452852
FBgn0039467	0.00641695	0
FBgn0267661	0.00211023	0.00202702
FBgn0020912	0.0906517	0.111971
FBgn0004606	0.606079	0.682182
FBgn0038771	0.179625	0.0945868
FBgn0037992	0.00958093	0.00289934
FBgn0037671	1.22857	1.03195
FBgn0051345	0.200603	0.148388
FBgn0037661	0.00328041	0.00281277
FBgn0038673	0.028092	0.0332069
FBgn0037548	0.00414664	0.00344105
FBgn0037506	0.0209651	0.0174714
FBgn0028837	0.149955	0.116409
FBgn0260794	0.93436	1.06523
FBgn0266464	0.329575	0.215612
FBgn0037622	0.110187	0.121178
FBti0019458	0.00880746	0.0164348
FBgn0037798	0.282229	0.186561
FBgn0039151	0.00214132	0.000693804
FBgn0086472	2.20298	1.97183
FBgn0082831	0.444095	0.346295
FBgn0040608	0.00547755	0.00158506
FBgn0043457	0.154035	0.135875
FBgn0039740	0.0772175	0.0862276
FBgn0038617	0.234463	0.219351
FBgn0037845	0.00150078	0.00340475
FBgn0270928	0.697818	0.855953
FBgn0038397	0.00181346	0.00127891
FBgn0038365	0	0.00391953
FBgn0037749	0.174996	0.117917
FBgn0285911	0.176562	0.168755
FBgn0037290	0.0100555	0.00467727
FBgn0002626	1.9723	1.75531
FBgn0040227	0.390291	0.289471
FBgn0038447	0	0.00295339
FBgn0038438	0.205336	0.156988
FBgn0039068	0.0353098	0.0353523
FBgn0046225	0.244685	0.231628
FBgn0024289	0.0033747	0.00122043
FBgn0015625	0.0272437	0.0253998
RR46410-transposable-element	0.0233603	0.00858661
FBgn0038601	0.0866985	0.13389
FBgn0038271	1.49844	1.28341
FBgn0015737	0.274518	0.234023
FBgn0027524	0.0755382	0.0717055
FBgn0003507	0.00489087	0.00246865
FBgn0042106	0.00407704	0.00273824
FBgn0039471	0	0.00578317
FBti0020298	0.137795	0.0927777
FBgn0003525	0.0981552	0.00488444
FBgn0015229	1.48673	1.57766
FBgn0283499	1.18085	1.17502
FBgn0039490	0.00144375	0.00134941
FBgn0037384	0.111323	0.161146
FBgn0265082	1.66636	1.76146
FBti0019350	0.00563732	0.0111447
FBgn0037239	0.447726	0.363382
FBgn0051313	0.018911	0.00798984
FBgn0039698	0.230464	0.173352
FBgn0037553	0.0171841	0.00152725
FBgn0038173	0	0.00747703
FBgn0265419	0.0014421	0.00679514
FBti0019326	0.0165723	0.00811354
FBgn0051125	0.082217	0.0956749
FBgn0039829	0.271645	0.238856
FBgn0010328	0.570389	0.592164
FBgn0038515	0.651407	0.738594
FBgn0039776	0.317109	0.311652
FBgn0019957	0.775147	0.596826
FBgn0000150	1.13851	1.04327
FBgn0038047	0.00221537	0.0195173
FBgn0002645	0.746234	0.831432
FBgn0004436	0.977887	1.06937
FBgn0069242	0.36444	0.283298
FBgn0083946	0.00217492	0.000543302
FBgn0038381	0.00136545	0.00512494
FBgn0051373	0	0.00312792
FBgn0044823	0.0871971	0.0809465
FBgn0053108	0.0818401	0.0965804
FBgn0051174	0.031493	0.0370605
FBgn0267810	0.004943	0.011939
FBgn0001280	0.237633	0.168914
FBgn0016917	0.926767	0.978551
FBgn0039339	0.00655892	0.0259797
FBgn0038038	0.0169381	0.000639613
FBgn0267953	0.0012926	0.00169477
FBti0019282	0.0012482	0.0008902
FBgn0039040	0	0.00210178
FBgn0038250	0.0180219	0.00174229
FBgn0038056	0.163259	0.15456
FBti0019425	0.00642529	0.00841692
FBgn0004118	0.721562	0.659777
FBgn0026190	0	0
FBgn0003889	0.0102513	0.0176693
FBgn0051550	0.494857	0.507025
FBti0062420	0.21138	0.135028
FBgn0027865	0.772635	0.718387
RR48326-transposable-element	0.0390896	0.20678
FBgn0286507	0.0118575	0.00687963
FBgn0037672	0.120246	0.179575
FBgn0038846	0.00263061	0.000899684
FBgn0038371	0.0113793	0.0131503
FBgn0039544	0.280455	0.259752
FBgn0263750	0.0128588	0.0126625
FBgn0039846	0.0330036	0.0327007
FBgn0010247	1.48689	1.45619
FBgn0261380	0.269019	0.176193
FBgn0037762	0.00307859	0.000524867
FBgn0040588	0.00144073	0.00166766
FBgn0051436	0.00229657	0.000704629
FBgn0037703	0.0815081	0.0916268
FBgn0040208	0.279354	0.288058
FBti0059724	0.00181101	0.00231235
FBti0019390	0.00870367	0.00439842
FBgn0039252	0.200167	0.196266
FBti0019384	0.0507307	0.0464284
RR48318-transposable-element	0.123914	0.090152
FBgn0038654	0.010951	0.0175912
FBti0019393	0.00438818	0.00308643
FBgn0004369	2.36504	2.29756
FBti0019364	0.0211287	0.0203307
FBgn0014869	1.25287	1.1182
FBgn0262167	0.105798	0.104893
FBgn0051460	0.154991	0.0981339
FBgn0002632	0.00943791	0.00100735
FBgn0039145	0.00471476	0.00479422
FBti0019376	0	0.00710334
FBgn0037978	0.273725	0.245171
FBgn0037359	0.105453	0.0474101
FBgn0038211	0.0282563	0.00986784
FBgn0039488	0.247685	0.187756
FBgn0039234	0.208649	0.131879
FBgn0039747	0.110414	0.085299
FBgn0038202	0.287606	0.291938
FBgn0038597	0.101035	0.0852108
FBgn0038237	1.72758	1.57776
FBgn0010113	2.46629	2.41056
FBgn0039743	0.365275	0.314786
FBgn0038083	0.00254052	0.000291861
FBgn0038972	0.00477308	0.00235655
FBgn0027620	0.508022	0.532801
FBgn0039170	0.0385518	0.0311113
FBgn0039759	0.00588782	0.000667736
FBgn0051467	0.027614	0.0101908
FBgn0002441	0.30753	0.320809
FBgn0014141	0.0171245	0.0321041
FBgn0038251	0.24027	0.223023
FBti0061829	0.00135635	0.00485072
FBgn0025457	0.178473	0.126869
FBgn0037653	0.225651	0.140791
FBgn0038261	0.00255235	0.000931629
FBgn0039593	0.00287284	0
FBgn0039321	0.00247864	0
FBgn0266227	1.01643	0.555912
FBgn0051198	0.00827699	0
FBgn0039645	0.000831173	0.000798994
FBgn0039187	0.590762	0.603437
FBgn0037304	0.0975424	0.0913831
FBgn0037913	0.200814	0.273017
FBgn0261552	3.30074	3.48946
FBgn0038897	0	0.00148071
FBgn0037836	0	0.00994038
FBgn0266581	0.185898	0.159776
FBgn0037856	0.160763	0.148098
FBgn0038947	0.798125	0.762696
FBgn0039849	0.034778	0.0459843
FBgn0016123	0.00206876	0.00148003
FBgn0038318	0.216243	0.198654
FBgn0039559	0.103878	0.120445
FBgn0264426	0.00157602	0.000852718
FBgn0037370	0.0538591	0.0397357
FBgn0037835	0.201694	0.0928853
FBgn0027493	0.502895	0.430008
FBgn0261053	0	0.000590966
FBgn0037801	0.00576184	0.0118016
FBgn0051451	4.79911	5.27173
FBgn0038256	0.00743231	0.0114733
FBgn0038549	0.315415	0.300402
FBgn0004087	0.00423019	0.00211173
FBgn0037472	0.476248	0.378938
FBgn0260962	0.280218	0.238651
FBgn0037684	0.00577453	0.00808433
FBgn0038722	0.0922506	0.0567413
FBgn0261356	0.00729375	0.00189721
FBgn0051475	0.398198	0.388125
FBgn0039738	0.785476	0.750347
FBgn0039381	0.54055	0.584371
FBgn0037250	0.196967	0.169331
FBgn0051155	0.164244	0.092561
FBgn0027526	0.125	0.127042
FBgn0039271	0.0670492	0.0535676
FBgn0037607	0.264706	0.105102
FBgn0037550	0.0765333	0.0715072
FBgn0038693	1.54923	1.55628
FBgn0038877	0.0997123	0.187382
FBgn0039766	0.129409	0.105322
FBgn0038106	0.135782	0.125229
FBgn0003275	0.547213	0.474465
FBgn0038045	0.00495888	0.00118746
FBgn0037408	0.140285	0.126904
FBgn0038407	0.00952403	0.000267855
FBgn0039644	0.189333	0.177944
FBgn0037819	0	0.0108121
FBgn0037235	0.0959286	0.0797131
FBgn0038923	0.24548	0.196369
FBgn0037843	0.351821	0.297772
FBgn0053208	0.725304	0.810257
FBgn0087012	0.711508	0.658404
FBgn0051547	0.0120474	0.014559
FBgn0040575	0.214542	0.158303
FBgn0039154	0.00882772	0.00702098
FBgn0038805	0.191606	0.145912
FBgn0051301	0.164708	0.149447
FBgn0260722	0.388711	0.469818
FBgn0262538	0	0.000514374
FBgn0038198	0.0010575	0
FBgn0039296	0.183175	0.131717
FBgn0039344	0.00640068	0.0141775
FBgn0038435	0.0340283	0.0295716
FBgn0037683	0.00251542	0.00702055
FBgn0037371	0.0627335	0.0495277
FBgn0037345	0.146951	0.0896398
FBgn0037614	0.295006	0.253892
FBgn0037525	2.14654	2.12333
FBgn0038046	0.263848	0.198031
FBgn0038536	0.0696059	0.089249
FBgn0037330	0.231333	0.16923
FBgn0259685	0.10326	0.0998145
FBgn0038946	0	0.00308316
FBgn0037533	0.980987	0.837634
FBgn0037712	0.0483033	0.0675211
FBti0019423	0.00269739	0.00264599
FBgn0038953	0.0811518	0.0658547
FBgn0051390	0.377165	0.240323
FBgn0038627	0.113308	0.0597936
FBgn0027583	0.156624	0.166082
FBgn0039632	0.13935	0.154199
FBgn0037442	0.899299	0.93997
FBgn0004103	1.00666	0.97079
FBgn0039702	0.0909042	0.0616849
FBgn0026059	0.948479	1.03232
FBgn0039683	0.0221884	0.0268567
FBgn0046756	0.00214269	0
FBgn0039125	0.0329081	0.0258725
FBgn0038467	0.0379323	0.0225745
FBgn0010926	0.162433	0.177012
FBgn0038387	0.28033	0.204602
FBgn0037244	0.360178	0.290964
FBgn0037979	0.197002	0.246844
FBgn0038225	0.000805723	0.000995667
FBgn0015591	1.42778	1.84247
FBgn0037613	0.145235	0.100957
FBgn0051262	0.000631919	0
FBgn0040528	0.037795	0.00804754
FBgn0051183	0.212677	0.168858
FBgn0014029	0.492756	0.372883
FBgn0013949	0.0446078	0.0250277
FBgn0037504	0.127587	0.173663
FBgn0037941	1.13456	1.17583
FBgn0267758	0	0.000858533
FBgn0267562	0.0241582	0.00920708
FBgn0023179	1.67734	1.65476
FBgn0051104	0.000899508	0
FBgn0046258	0.00847283	0.00941287
FBgn0038095	0.0293068	0
FBgn0038723	0.235362	0.1567
FBgn0022359	0.0106357	0.00680417
RR48350-transposable-element	0.030089	0.0195729
FBgn0051251	0.0782672	0.061794
FBgn0039113	0.0848267	0.0878675
FBgn0038277	0.00348051	0.0091998
FBgn0262473	0.875785	1.07282
FBgn0259222	1.13945	0.983808
FBgn0016120	1.59931	1.30586
FBgn0037853	0.0053384	0.00323823
FBgn0262974	0	0
FBgn0038606	0.772123	0.856825
FBgn0039869	0.216657	0.14397
FBgn0026565	0	0
FBgn0037723	0.185719	0.203124
FBgn0264741	0.00165105	0.00549338
FBgn0266698	0.00724527	0.00497347
FBgn0265041	0.0207396	0.020236
FBgn0038426	0.620446	0.49489
FBgn0037719	0.109569	0.12389
FBgn0038002	0	0
FBgn0027508	0.341162	0.307853
FBgn0003205	1.0658	0.982782
FBgn0002772	0.00107425	0
FBgn0027497	0.327411	0.329141
FBgn0039454	0.00317788	0.00397065
FBgn0038471	0.116688	0.108699
FBti0019430	0.0254556	0.0406983
FBgn0051144	0.00489736	0.00660724
FBgn0024833	0.317928	0.326958
FBgn0014879	0.278799	0.254339
FBgn0039420	0.992733	1.10243
FBgn0039210	0.218559	0.254347
FBgn0039055	0.191499	0.203886
FBgn0024330	0.362266	0.370169
FBgn0038590	0.0201661	0.0365828
FBgn0278604	0.0223118	0.03886
FBgn0024944	0.523247	0.590132
FBgn0261015	0.0155441	0.0114036
FBti0019437	0.0138068	0.00853612
FBgn0039189	0.0257452	0.0190728
FBgn0054041	0.000448863	0
FBgn0266735	0.00204794	0.00407111
FBgn0002868	0.0255767	0.015596
FBgn0065098	0.741724	0.32616
FBgn0051352	0.722964	0.780183
FBgn0014135	0.288799	0.22445
FBti0063293	0.0154402	0.0233262
FBgn0039642	0.0708787	0.0873423
FBgn0265189	0.0285057	0.0403595
FBgn0266719	0.0234712	0.00775653
FBgn0000166	0	0.000462013
FBgn0283438	0.493961	0.520154
FBgn0039680	0.00485995	0.00152993
FBgn0051445	0	0
FBgn0053329	0.00303875	0.00351154
FBgn0037901	0.039471	0.0259653
FBgn0039664	0.0692733	0.092146
FBgn0039427	0.327748	0.267971
FBgn0022338	0.141606	0.125177
FBgn0285959	0.0297728	0.0157613
FBgn0039056	0.338974	0.32355
FBgn0051370	0.0134213	0.0158769
FBgn0022800	0.0203636	0.00983558
FBgn0267160	0.598324	0.00316903
FBgn0003479	0.00259892	0.0899989
FBgn0051300	0.00222563	0.0176924
FBgn0028471	0.511322	0.575941
FBgn0051326	0.0305792	0.0115418
FBgn0038110	0.107459	0.0615269
FBti0019369	0.00581513	0.025123
FBgn0037975	0	0
FBgn0264495	1.60098	1.58194
FBgn0037726	0.00942807	0.00188976
FBgn0013576	2.93511	2.88514
FBgn0038401	0.232117	0.253033
FBgn0019972	0.0308587	0.0338183
FBgn0264005	0.713732	0.66295
FBgn0044511	0.457801	0.406386
FBgn0038087	0.643553	0.614974
FBgn0261393	0	0.00303683
FBgn0037606	0.309425	0.319612
FBgn0037632	0.146424	0.12426
FBgn0038054	0.0353797	0.0275271
FBgn0010803	0.127422	0.138611
FBgn0037730	0.00241471	0.00254804
FBgn0038565	0.00301292	0.00472464
FBgn0039633	1.36489	1.52658
FBgn0039110	0.130691	0.109939
FBti0061925	0.00923234	0.0140228
RR48325-transposable-element	0.0343032	0.0323043
FBgn0003867	0	0.0148588
FBgn0052944	0.35474	0.292332
FBgn0039558	0.148558	0.119955
FBgn0004618	0	0.000532394
FBgn0038013	0.112155	0.0933069
FBgn0066101	1.46459	1.49978
FBgn0039169	0.103758	0.142925
FBgn0003862	1.52547	1.58278
FBgn0038840	0.0582558	0.0897482
FBgn0259113	0	0.000422411
FBgn0039580	0.291803	0.281646
FBgn0002783	0.27892	0.222473
FBgn0250746	0.290992	0.239411
RR42049-transposable-element	0.00509909	0.00164275
FBgn0051231	0.00321316	0.00469947
FBgn0015351	0.065263	0.0509988
FBgn0263662	0.00499238	0
FBgn0039203	0.0312955	0.00722973
FBgn0004587	1.96834	1.92514
FBgn0000039	0.685184	0.654791
FBgn0086346	0.387483	0.361307
FBgn0039013	0.099824	0.0501352
FBgn0037792	0.120829	0.0946425
FBgn0039882	0.244223	0.193742
FBgn0262614	1.22017	1.17194
FBgn0000416	0.591463	0.553403
FBgn0039451	0.322525	0.362945
FBgn0042213	0.17287	0.108861
FBgn0010750	0.327334	0.260339
FBgn0011740	0.189831	0.191144
FBgn0037877	0.193307	0.204151
FBgn0038826	2.46555	2.4192
FBgn0051118	0.582846	0.479262
FBgn0039430	0.344772	0.452947
FBgn0039479	0.00668352	0.00567736
FBgn0038682	0.00232659	0.00169966
FBgn0039084	0.00696883	0.00277888
FBgn0039675	0.00674675	0.00242171
FBgn0038018	0.0012926	0.00291166
FBti0062874	0.00530007	0.00406538
FBgn0038929	0.457727	0.36964
FBgn0038950	0.133803	0.121841
FBgn0038720	0.0718908	0.0550875
FBgn0051008	0.00632412	0.00556797
FBgn0267239	0	0
FBgn0003882	0.156579	0.175012
FBgn0039647	1.7285	1.75948
FBgn0001149	0.131495	0.0338226
FBgn0083949	1.73335	1.78434
FBgn0267567	0.0156623	0.0108555
FBgn0067783	0.15559	0.201922
FBgn0038400	1.07285	0.970614
FBgn0266248	0.0124853	0.00516084
RR48386-transposable-element	0.0566086	0.0683243
FBti0019377	0.0104855	0.0122593
FBgn0038167	0.200548	0.204952
FBgn0038290	0.419446	0.00531923
FBgn0038788	0.262823	0.174694
FBgn0037521	1.81814	1.97326
FBgn0264325	0.126904	0.149496
FBgn0019960	0.535156	0.478643
FBgn0259244	1.45662	1.45248
FBgn0004509	1.10204	1.19315
FBgn0037710	0.12254	0.109756
FBgn0038542	0.691516	0.810335
FBgn0046247	0.607404	0.53981
FBgn0037831	0.247504	0.259433
FBgn0037465	0.217624	0.168508
FBgn0259736	0.00806068	0.0316417
FBgn0037772	0.00213988	0
FBgn0086608	0.010626	0.0103143
FBgn0038916	0	0
FBgn0038767	0.0928939	0.0843855
FBgn0005596	0.0786055	0.115436
FBgn0037315	0.27632	0.233256
FBgn0020235	1.30166	1.00647
FBgn0265159	0.000816936	0.00540286
FBgn0039158	0.0795944	0.0641812
FBgn0038830	0.416282	0.244355
FBgn0260944	1.09141	0.646371
FBti0019392	0.0104086	0.00360828
FBgn0051439	0	0.00440193
FBgn0039620	0.00442696	0
FBgn0037937	0.0593796	0.0521241
FBgn0040554	0.00594487	0.0111521
FBgn0085454	0.0265421	0.0182382
FBgn0039266	0.091905	0.060028
FBgn0039639	0.035815	0.0330117
FBgn0261929	0.213498	0.216373
FBgn0039532	0.321216	0.290331
FBgn0039710	0.19437	0.150544
FBgn0037757	0.155727	0.140363
FBgn0037295	0.35471	0.403438
FBgn0085466	0	0.000916811
FBgn0038876	0.21387	0.170401
FBgn0037899	1.27347	1.07171
FBgn0039867	0.0535304	0.0476052
FBgn0053213	0.062938	0.0432529
FBgn0038146	0.0655756	0.0691693
FBgn0039625	0.0685511	0.050605
FBti0062423	0.152323	0.144048
FBgn0038880	0.260948	0.17021
FBgn0037754	1.17339	1.17131
FBgn0260005	0.00982455	0.0353396
FBgn0026250	1.72829	1.69895
FBgn0037660	0.220309	0.186794
FBgn0037878	0.339258	0.347699
FBgn0053547	2.70382	2.66676
FBti0019470	0.0200482	0.0158136
FBgn0037356	0.162381	0.121873
FBgn0038738	0.165335	0.107622
FBgn0038816	0.119822	0.149636
FBgn0004908	0.215115	0.129577
FBgn0263740	0.220992	0.199024
FBgn0038474	0.367689	0.219952
FBti0019463	0.0240514	0.0181132
FBgn0259704	0.148017	0.0763864
FBgn0005659	0.00175479	0.000689224
FBgn0015019	0.372348	0.352676
FBgn0265067	0.0166619	0.0208995
FBgn0263351	0.369273	0.345201
FBgn0051374	0.0153157	0.0109589
FBgn0267757	0.031186	0.0447737
FBgn0000083	0.0265138	0.0709658
FBgn0039214	0.640817	0.604183
FBgn0262869	1.69156	1.72932
FBgn0011481	1.78269	1.84515
FBgn0038463	0.0550515	0.0495101
FBgn0010772	1.74135	1.68918
FBgn0038180	0.00109624	0.00103526
FBgn0037427	0	0.000884442
FBgn0004666	0.00683418	0.0128493
FBgn0037341	0.154591	0.134651
FBgn0037841	0.0439967	0.0449498
FBti0019435	0.0233247	0.0141337
FBgn0014380	0.00303172	0
FBgn0011666	2.77076	2.80373
FBgn0263650	0.0150878	0.0211037
FBgn0266745	0.0109712	0.00153458
FBgn0038735	0.492146	0.517724
FBgn0039356	0.0825747	0.0437785
FBgn0038917	0.0246706	0.0214441
FBgn0267698	0.918397	0.94298
FBgn0037583	0.0205462	0.0161225
FBgn0038446	0.330273	0.275124
FBgn0262955	0.194647	0.203869
FBgn0038429	0.0883716	0.0944815
FBgn0040524	0	0
FBgn0014018	0.0700741	0.0667104
FBgn0039629	0.00698006	0.00985413
FBgn0037875	0.117507	0.0853379
FBgn0266673	0.146622	0.152759
RR48319-transposable-element	0.0132931	0.184357
FBgn0026380	0.325478	0.217789
FBgn0037483	0.0285592	0.0376606
FBgn0004898	0.00750884	0.00434
FBgn0038787	0.490508	0.526545
FBgn0051457	0.103993	0.0832227
FBgn0037619	0.0437951	0.0416075
FBgn0039117	0.044864	0.061731
FBgn0086370	0.63755	0.669548
FBgn0037750	0.0037374	0.00269953
FBgn0038205	0.0143926	0.0228467
FBti0020307	0.195973	0.185629
FBgn0010877	0.520683	0.586527
FBti0019409	0.00163567	0.00141954
FBgn0263408	0.000554142	0
FBgn0266668	0.187363	0.149541
FBgn0039407	0.0136864	0.00685716
FBgn0039489	0.0659239	0.0495962
FBgn0037609	0.219567	0.157239
FBgn0037796	0.00531544	0.017811
FBgn0000504	0.00736354	0.0172185
FBgn0260793	1.02878	1.03283
FBgn0039066	0.509952	0.537722
FBgn0038974	0.136918	0.123182
FBgn0037637	2.42779	2.16327
FBgn0039688	0.544252	0.607089
FBgn0051549	0.110039	0.169118
FBgn0051278	0.0475417	0.0514018
FBgn0039504	0	0
FBgn0000659	0.389765	0.43126
FBgn0038349	0.0111174	0
FBgn0038129	0.132938	0.10973
FBgn0038766	0.0433676	0.0290732
FBgn0038868	0.211855	0.121314
FBgn0015778	1.76937	1.85524
FBgn0051103	0.00386714	0
FBgn0046214	0.622616	0.445695
FBgn0046696	0.0883717	0.114262
FBgn0039355	0.0281981	0.0336635
FBti0061892	0.00296864	0.00557468
FBgn0051324	1.48561	1.37394
FBgn0037454	0.137665	0.142952
FBgn0039257	0.200547	0.194942
FBgn0267551	0.0111469	0.022465
FBgn0011715	0.24053	0.202165
FBgn0037716	0.38939	0.389972
FBgn0028708	0.141259	0.150165
FBgn0038890	0.511209	0.507144
FBgn0037648	0.189526	0.167221
FBgn0037569	0.0339712	0.040089
FBgn0067628	0.0788713	0.035968
FBgn0039402	0.260998	0.209295
FBgn0039156	0.0905266	0.0515359
FBgn0024958	0.213707	0.191497
FBgn0004359	0.00315627	0.00383388
FBgn0243514	0.016295	0.0014799
FBgn0037707	0.271244	0.21621
FBgn0039566	0.147634	0.188243
FBgn0024222	0.0012559	0.00344564
RR48336-transposable-element	0.00602557	0.0057585
FBgn0003499	1.8096	1.84812
FBgn0037561	0.0785234	0.0539289
FBgn0039102	0.00268346	0.00536686
FBgn0038683	0.395087	0.381202
FBgn0038420	0	0.0162721
FBgn0039111	0.12572	0.106762
FBti0062083	0.000846383	0.0141032
FBgn0039137	0.113091	0.109153
FBgn0011581	0.00613568	0.0123404
FBgn0260741	0.0669807	0.0742023
FBgn0039120	0.350381	0.315258
FBgn0262577	0.0129139	0.0184014
FBgn0051453	0.0735576	0.0628803
FBgn0260003	0.953927	1.00645
FBgn0086378	0.684727	0.571967
FBgn0038810	0.139515	0.121726
FBti0020321	0.0178734	0.000621245
FBgn0039449	0.0305038	0.0346717
FBgn0038672	0.236672	0.238488
FBgn0037470	0.237941	0.201995
FBti0061704	0.0244628	0.000453239
FBgn0028476	0.445869	0.54493
FBgn0261285	1.12252	1.35835
FBgn0020496	1.98115	1.94959
FBgn0039581	1.10925	1.07849
FBgn0039528	0.833129	0.967524
FBgn0011336	0.17687	0.153796
FBgn0037552	0.00936406	0
FBgn0046222	0.118483	0.0948605
FBgn0039689	0.139448	0.106801
FBgn0037581	0.0503475	0.0534618
FBgn0029503	0.0854826	0.0868733
FBgn0016061	2.15268	2.19108
FBgn0027930	0.083791	0.0262506
FBgn0051363	1.57157	1.37227
FBgn0267730	0.00228254	0.00242335
FBgn0262975	0.590779	0.616179
FBgn0267711	0.00852057	0.0012545
FBgn0039165	0.0578338	0.037985
FBti0019440	0.00450515	0.00760547
FBgn0262540	0.00338261	0.000615573
FBgn0038551	0.175699	0.187144
FBgn0024841	0.471089	0.337618
FBti0059762	0.0125985	0.00389614
FBgn0267748	0.00142872	0.0146203
FBgn0053512	0.780131	0.813191
FBgn0260940	0.151413	0.131885
FBgn0262105	0.00136987	0.00048835
FBgn0037880	0.0722128	0.0645285
FBgn0000064	2.27874	2.28972
FBgn0267790	0.74127	0.703114
FBgn0037874	1.41077	1.11181
FBgn0039623	0.191509	0.226456
FBgn0267780	0.00626695	0.00127833
FBgn0042094	0.12934	0.0941096
FBgn0051098	0.330883	0.316098
FBgn0038488	0.336819	0.420531
FBti0019343	0	0.00302371
FBgn0037372	0.13634	0.107281
FBgn0011476	0.422471	0.399797
FBgn0038928	0.0265133	0.0323075
FBgn0020910	2.14843	1.85287
FBgn0037612	0	0.00713198
FBgn0027578	0.00702278	0
FBgn0267203	0.00288832	0.000607294
FBgn0038746	0.27236	0.295437
FBgn0038260	0.00671005	0.00286425
FBgn0263620	0.0384529	0.052214
FBgn0011596	0.00866951	0.0107663
FBgn0039126	0.2185	0.198061
FBgn0263768	0.133763	0.140123
FBgn0266409	1.46769	1.53824
FBgn0001138	0.50813	0.51877
FBgn0085315	0	0
FBgn0037633	0.0924561	0.065046
FBgn0028396	0.0796961	0.00259471
FBgn0051431	0	0
FBti0020297	0.0518135	0.0611879
FBgn0263929	1.00086	1.13793
FBgn0038269	0.100505	0.123276
FBgn0040238	0.193411	0.239353
FBgn0039306	0.119684	0.134097
FBgn0053094	0.437529	0.409517
FBgn0037344	0.903629	0.976343
FBgn0265379	0.136098	0.166111
FBgn0037261	1.10923	0.964414
FBgn0039312	0.0285236	0.0254758
FBgn0037755	0.344958	0.339113
FBgn0037918	0.194649	0.227306
FBgn0039801	0.00695863	0.0115728
FBgn0267431	0.418125	0.353576
FBgn0263499	0.00390583	0.0044421
FBgn0039030	0.0142297	0.0125383
FBgn0266721	0.405743	0.405519
FBgn0037248	0.171868	0.199638
FBgn0038449	0	0.00235346
FBgn0267787	0.00784547	0.00410012
FBgn0014863	0.217132	0.193663
FBgn0039774	0	0.0507599
FBgn0029512	0.208409	0.163065
FBgn0264357	1.32649	1.28035
FBgn0002622	2.01504	1.70638
FBti0020302	0.00189065	0
FBgn0051233	0.00663985	0
FBgn0039782	0	0
FBgn0039464	0.748552	0.801433
FBgn0037944	0.245921	0.238611
FBgn0039213	0.435302	0.467393
FBgn0038099	0	0
FBti0062387	0	0.000533414
FBgn0037513	0.0176736	0.00809209
FBti0019347	0.030144	0.0266561
FBgn0038922	1.11382	1.02018
FBgn0051100	0.00757314	0.00491234
FBgn0264916	0.00125024	0
FBgn0051360	0.473472	0.356327
FBgn0037759	0.00201265	0.0153346
FBgn0039225	0	0.00109853
FBgn0037325	0.000976012	0.00671984
FBgn0037578	0.0825602	0.101232
FBgn0263663	0.0243219	0.0226819
FBgn0039112	0.960724	0.78918
FBgn0037976	0.0267657	0.0244738
FBgn0037935	0	0.00178634
FBgn0024963	2.98326	2.86924
FBgn0038704	0.460462	0.475362
RR42085-transposable-element	0.0097439	0.00322437
FBgn0020510	0.309216	0.231026
FBgn0039723	0.0558053	0.155166
FBgn0025802	0.265965	0.270831
FBgn0051244	0	0.00685069
FBgn0039735	0.258654	0.213601
FBgn0038462	0.165852	0.149117
FBgn0037635	0.093443	0.119766
FBti0019374	0.0345212	0.00854771
FBgn0038300	0.106669	0.0682155
FBti0019302	0.00858231	0.0189928
FBgn0001296	0.0844949	0.0461327
FBgn0039218	0.433671	0.341681
FBgn0039140	0.397657	0.350921
FBgn0011020	0.0522346	0.0553246
FBgn0286035	0.00340343	0.0074721
FBgn0038168	0.136129	0.16005
FBgn0026400	0.208751	0.135168
FBti0019333	0	0
FBgn0038424	0.290392	0.262795
FBgn0038842	0.0127317	0.0112296
FBgn0003886	0	0.000189496
RR48374-transposable-element	0.0186595	0.00654844
FBti0019416	0.0223472	0.0421323
FBgn0046763	0.00249552	0.00647991
FBgn0083943	0	0.00279552
FBgn0037949	0.763551	0.873563
FBgn0038837	0.253393	0.352646
FBti0019401	0.0302722	0.0173051
FBgn0037435	0.0849166	0.0726634
FBgn0027951	0.511618	0.534602
FBgn0261599	2.31367	2.01367
FBgn0025865	0.279363	0.275754
FBgn0038595	0	0.00249772
FBgn0286516	3.60276	3.57955
FBgn0051472	0.294101	0.261863
FBgn0037763	0	0.00132602
FBgn0002906	0.171048	0.170407
FBgn0039130	0.0447785	0.0360097
FBgn0266720	0.453633	0.52296
FBgn0267975	1.19	1.14618
FBgn0038299	0.012793	0.00603991
FBgn0267157	0.0190837	0.00890893
FBgn0039595	0.00504691	0.00260484
FBgn0027090	0.0908515	0.070064
FBgn0038924	0.0908267	0.0707617
FBgn0039417	0.0751894	0.0558565
FBgn0037445	0.26933	0.300881
FBgn0037240	0.183084	0.202056
FBgn0039081	0.00410974	0.0352134
FBgn0038858	0.0302355	0.0731113
FBgn0038491	0.215267	0.209521
FBgn0037770	0.0580422	0.102377
FBgn0266414	1.89973	1.76392
FBgn0014022	0.210103	0.180918
FBgn0264907	0.474422	0.465098
FBgn0037236	0.00181569	0
FBgn0037647	0.180093	0.136274
FBti0019428	0.00598442	0.00430927
FBgn0003011	0.00940933	0.036804
FBgn0051481	0.362471	0.343242
FBgn0003137	0	0.000265598
FBgn0039132	0.946938	0.887735
FBgn0037608	0.251629	0.177435
FBgn0039419	0.230055	0.214733
FBgn0039808	0.949334	0.967326
FBgn0086679	0.270987	0.231265
FBgn0013279	2.11955	1.80529
FBgn0263289	1.12351	0.98942
FBgn0039149	0.836759	0.710663
FBgn0051109	0.262344	0.20293
FBgn0011774	0.122059	0.0796885
RR48347-transposable-element	0.0857039	0.0553876
FBgn0259146	0.439585	0.552754
FBgn0025574	0.817568	0.733463
FBgn0038516	0.0027487	0
FBgn0039712	0.351841	0.24267
FBgn0038769	0.0159492	0.0195577
FBgn0038930	0.0150747	0.00694524
FBgn0037765	0.0142141	0.00344914
FBti0019367	0.00754205	0.0116744
FBgn0028436	0.0796195	0.0741383
FBgn0020278	0.010715	0.0239728
FBgn0039857	2.18432	1.78431
FBgn0261988	1.52738	1.44954
FBgn0037838	0.112682	0.0577446
FBgn0038432	0.301273	0.218494
FBgn0039863	0.307016	0.319575
FBgn0250757	0.00373383	0.0232998
FBgn0038088	0.00335468	0.00574504
FBgn0038235	0.125939	0.118631
FBgn0003134	1.2758	1.31981
FBgn0029157	0.275901	0.328907
FBgn0039124	0.0111725	0.0056032
FBgn0087005	0	0.00469986
FBgn0027654	1.84807	1.61801
FBgn0037676	2.00717	1.96614
FBgn0039492	0.753989	0.755614
FBgn0283536	2.23019	2.03015
FBgn0002431	0.463495	0.58861
FBgn0262741	0.0564433	0.0561578
FBgn0038533	0.146229	0.152204
FBgn0040071	1.21076	1.2276
FBgn0043900	0.415726	0.414285
FBgn0014006	0.193525	0.19676
FBgn0037920	0.112887	0.0868852
FBgn0037336	0.687208	0.806405
FBgn0028984	0.0205777	0.00482026
FBgn0051414	0.00169817	0
FBgn0039770	0.461071	0.562405
FBgn0010389	0.00940979	0.0280085
FBgn0028833	1.00602	0.879776
FBgn0051538	0.091177	0.0675575
FBgn0039336	0.0541151	0.0392727
FBgn0263048	0.180492	0.138291
FBgn0051004	0	0.000703509
FBgn0004622	0.118455	0.191652
FBgn0265426	0	0
FBgn0028671	1.33864	1.32356
FBgn0038964	0.406062	0.319646
FBgn0015622	0.802919	0.788502
FBgn0038552	0.145576	0.103421
FBgn0037826	0	0.00717105
FBgn0051064	0.568672	0.583205
FBgn0039651	0.00139096	0.00114607
FBti0019402	0.0165995	0.0239801
FBgn0037855	0.313271	0.286781
FBgn0264493	1.29515	1.39042
FBgn0039283	0.238151	0.213949
FBgn0051344	0.229432	0.150293
FBgn0024912	0.159705	0.135282
FBgn0038389	0.223807	0.220139
FBgn0262125	0.363969	0.358091
FBgn0263490	0.313821	0.325149
FBgn0263414	0.00400773	0.0161036
FBgn0264826	0.000434983	0.0105506
FBti0059775	0	0.00106279
FBgn0044810	0	0
FBgn0082582	0.688895	0.749217
FBgn0020299	0.00250025	0.0324942
FBgn0037490	0.0548037	0.0333283
FBti0019301	0.00182351	0.00482945
FBgn0039094	0.0150538	0.000254472
FBgn0010774	0.776234	0.746376
FBgn0264324	0.472872	0.527643
FBgn0028670	0.00161122	0
FBgn0039006	0	0
FBgn0037332	0.303188	0.280466
FBgn0039691	0.0873519	0.0596624
FBgn0037232	0.299312	0.314387
FBgn0037667	0.0299994	0.0246855
FBgn0023023	0.905488	0.810995
FBti0061797	0.00594402	0.00515993
FBgn0038862	0.171291	0.200638
FBgn0047114	0.08826	0.0398489
FBgn0005355	0.0982097	0.0797103
FBgn0039150	0.16822	0.156838
FBgn0027512	0.388774	0.398351
FBgn0039153	0.100539	0.105015
FBgn0038679	0.0255203	0.0925987
FBgn0038581	0.154085	0.122409
FBgn0027655	0.452259	0.507492
FBgn0013953	0.000804237	0.00153953
FBgn0285937	0.981619	1.05181
FBgn0038258	0.0041556	0.00862072
FBgn0004885	0.478128	0.451231
FBgn0053110	0.00112285	0
FBgn0038510	0.00116752	0.00538098
FBgn0037644	0.139963	0.102196
FBgn0039155	0	0
FBgn0039183	0.035745	0.0480588
FBgn0017577	0.0104561	0.00540057
FBgn0038811	0.0730325	0.0521959
FBgn0267201	0.0113885	0.00797086
FBgn0024509	0.325132	0.2883
FBgn0053098	0.000551837	0
FBgn0051102	0	0.00758456
FBgn0010038	0.00133945	0.000618307
FBgn0038660	0.00274462	0.00758008
FBgn0262146	0.00523615	0.00318382
FBgn0037535	0.268248	0.205118
RR48337-transposable-element	0.00260344	0.00180745
FBgn0015011	0	0
FBgn0051368	0.125836	0.120315
FBgn0039329	0.109327	0.092343
FBgn0037617	0.0553251	0.0890311
FBgn0039663	0.0199106	0.0614433
FBgn0000024	1.7568	1.68382
FBti0059666	0.260714	0.242023
FBgn0045866	0.494355	0.329182
FBgn0038053	0.562004	0.36481
FBgn0266756	0.621209	0.639412
FBgn0037756	0.215738	0.203726
FBgn0051148	0.00164155	0
FBgn0037265	0.111697	0.0739277
FBgn0039326	0.00434524	0.00231156
FBgn0000303	0.639807	0.58373
FBgn0051342	0.288937	0.258955
FBti0019394	0.00106371	0
FBgn0037251	0.181035	0.140547
FBgn0262825	0.00983981	0.00416615
FBgn0039800	0.024867	0.0279916
RR48385-transposable-element	0.0170249	0.00517439
FBgn0262801	0.438121	0.346532
FBgn0265376	0.12341	0.133185
FBgn0051365	0.128291	0.114575
FBgn0037788	0.0113214	0.0882944
FBgn0000463	0.0210819	0.0505638
FBgn0011217	1.59478	1.63394
FBgn0038609	0.0621534	0.0360961
FBgn0039640	0.00331172	0.00926333
FBgn0039555	0.244422	0.240727
FBgn0038585	0.195523	0.122902
FBgn0083991	0.83119	0.780005
FBgn0051151	1.01497	1.02887
FBgn0039886	0.000972281	0
FBgn0037536	0.419111	0.481346
FBgn0038651	0.129614	0.187057
FBgn0039212	0.274667	0.226835
FBgn0265101	0.296698	0.235503
FBgn0051216	0.0624246	0.052293
FBgn0051279	0	0
FBgn0044812	0	0.000189496
FBgn0038583	0.141454	0.152018
FBgn0039335	0.0695041	0.0548089
FBgn0039757	2.17839	1.86267
FBgn0039241	0.0310951	0.0166001
FBgn0024432	0.578974	0.51453
FBgn0040571	0.090592	0.182692
FBgn0015331	0.137087	0.161098
FBgn0037482	0.214212	0.23238
FBgn0038948	0.120902	0.0891017
FBgn0039159	0.409284	0.261637
FBgn0286042	0.0165047	0.00959516
FBgn0038425	0.12558	0.0703028
FBgn0039045	0.00733026	0
FBgn0040532	0.0757612	0.0591063
FBgn0038893	0.157588	0.14243
FBgn0022349	0.629967	0.616859
FBgn0038325	0.186166	0.155974
FBgn0038304	0.137845	0.119618
FBgn0038532	0.288494	0.257453
FBgn0039855	0.00482043	0.0110084
FBgn0037291	0.00186194	0.00105543
FBgn0013981	2.51827	2.07519
FBgn0037687	0.0384306	0.035935
FBgn0013759	2.59178	2.58098
FBgn0038889	0.105219	0.0819779
FBti0019334	0.00112825	0.00410529
FBgn0024555	0.807257	0.895454
FBti0020301	0.00482082	0.00367219
FBgn0261641	1.3476	1.33806
FBgn0039737	0.884157	0.587739
FBgn0086605	0.273149	0.175713
FBti0019288	0.00687412	0.00474992
RR48333-transposable-element	0.0241538	0.0244958
FBgn0022787	0.497758	0.490307
FBgn0039564	0.00698228	0.008104
FBgn0027610	0.43116	0.403878
FBgn0038388	0.366128	0.336043
FBgn0266053	0.245552	0.324263
FBgn0038653	1.71161	1.82897
FBgn0037973	0.0105174	0
FBti0019439	0.00933155	0.0203704
FBgn0038084	0.363207	0.388789
FBgn0039756	0.0060103	0.0197465
FBgn0086371	0.225186	0.121503
FBgn0024321	0.584556	0.666905
FBgn0260243	0.137792	0.139489
FBgn0259740	0.105674	0.0904849
FBgn0039227	0.151952	0.174309
FBgn0038665	0.00414447	0.0150542
FBgn0038312	0.0484666	0.0332431
FBgn0040283	0.478878	0.526523
FBgn0015222	1.8987	1.72913
FBgn0013347	0.62118	0.468006
FBgn0038079	0.00238694	0.0117294
FBgn0037520	0.00805948	0.00659733
FBgn0037263	0.0111247	0.0208968
FBgn0051229	0.376404	0.391533
FBgn0038803	0.321697	0.29984
FBgn0038172	0.0364573	0.0160612
FBgn0085438	0.00808124	0.0236353
FBti0019356	0.00122123	0.00300068
FBgn0261984	0.27931	0.372075
FBgn0083975	1.05831	1.1907
FBgn0037627	0	0.000784088
FBgn0267742	0.0166277	0.00659547
FBgn0266252	0.00197626	0.00531658
FBgn0008646	0	0.00110939
FBgn0039282	0.705241	0.839665
FBgn0039017	0.0274919	0.0330195
FBgn0037879	0.00535588	0.00537942
FBgn0259938	0.744966	0.759655
FBgn0004597	0.128063	0.079242
FBgn0039637	0.251355	0.270251
FBgn0037589	0.070792	0.0656785
FBgn0038872	0.456082	0.485505
FBgn0039273	0.0720299	0.05042
FBgn0039116	0.366985	0.300742
FBgn0037503	0	0.000914959
FBgn0250755	0.0824577	0.109677
FBgn0038596	0.463101	0.333797
FBgn0037989	0.513439	0.542088
FBgn0037713	0.106736	0.0591867
FBgn0038686	0.226023	0.204683
FBgn0037778	0.0254475	0.0319641
FBgn0051469	0.0246877	0.0138175
FBgn0037615	0.00565321	0.00334665
FBgn0027338	0.744039	0.789558
FBgn0263143	0.00446221	0.0170403
FBgn0266705	0.0374831	0.019211
FBgn0003884	2.03537	1.7272
FBgn0010433	0	0.00181597
FBgn0051051	0.354339	0.265785
FBgn0262483	2.042	2.06335
FBgn0039600	1.18092	0.99244
FBgn0003339	0.0960818	0.0781118
FBgn0051111	0.0818669	0.0911521
FBgn0250753	1.17994	1.11108
FBgn0038472	0.150177	0.1398
FBgn0266401	0.00206038	0.00139322
FBgn0001234	4.92429	4.98368
FBgn0265140	0.745865	0.808316
FBgn0038324	0.0398239	0.0357147
FBgn0015282	0.396328	0.360623
FBgn0037652	0.204178	0.176242
FBti0020294	0.0421023	0.0324465
FBgn0003308	0.00583053	0.00129979
FBgn0039294	0.00156317	0.00108266
FBgn0038282	1.76361	1.83001
FBgn0266801	2.25447	2.16473
FBgn0038608	0	0
FBgn0020407	0.0556177	0.0312083
FBgn0039452	0	0.004015
FBgn0028992	0.189092	0.156688
FBgn0003093	1.68826	1.76547
FBgn0037280	0.00113243	0.000300632
FBgn0039099	0	0.0148319
FBgn0038845	0.00106488	0.000571948
FBgn0038427	0.292587	0.274534
FBgn0038681	0	0.00771444
FBgn0039831	1.5326	1.56234
FBgn0039175	0.0723194	0.0816003
FBgn0027378	0.255002	0.213668
FBgn0038593	0.065169	0.0965449
FBgn0037960	0.0204707	0.00937041
FBgn0039115	0.217778	0.156361
FBgn0038327	0.0946445	0.0582694
FBgn0261928	2.02908	2.05302
FBgn0003598	0.169692	0.173512
FBgn0037398	0.00132572	0.00110939
FBgn0010355	0.350862	0.374285
FBgn0010173	0.253305	0.173763
FBgn0039736	0.000597064	0.00432273
FBti0019304	0.00471358	0.0161969
FBgn0261808	0.282586	0.249291
FBti0020330	0.00299993	0.00212314
FBgn0040534	0.439816	0.382456
FBgn0037739	0.115695	0.0957061
FBgn0038353	0.0190305	0.00225629
FBgn0053202	1.34907	1.40533
FBti0019448	0	0.0195416
FBgn0039135	0.437833	0.564439
FBgn0265420	0.046765	0.0709348
FBgn0039844	0.900209	1.00197
FBgn0266390	0.0087532	0.0405164
FBgn0037468	0.466263	0.374143
FBgn0038080	0.307355	0.109718
FBgn0051092	0.74167	0.83502
FBgn0010313	1.55926	1.69351
FBgn0038487	0.0012926	0.00885925
FBgn0042104	0	0
FBgn0011582	1.14401	1.1921
FBgn0040670	0.0195461	0.0243709
FBgn0037895	0.0120641	0.00343419
FBgn0069923	1.37574	1.24317
FBgn0051029	0.000764363	0.0159631
FBgn0040601	0.00993983	0.00527033
FBti0062536	0.0073281	0.00464326
FBgn0039678	0.00150627	0.00316272
FBgn0037638	0.0679235	0.0853989
FBti0019373	0.015201	0.00951542
FBgn0039505	0.456005	0.307342
FBgn0039816	0.95497	0.838612
FBgn0250839	0.164587	0.0950629
FBgn0039788	0.00494723	0.00420585
FBgn0028468	0.0105615	0.0200326
FBgn0039862	0.673249	0.788825
FBgn0003482	0.00141679	0.000754261
FBgn0038548	0.12623	0.0752746
FBgn0013973	0.767659	0.788037
FBgn0037892	0.414506	0.294341
FBgn0086686	1.61098	1.76597
FBgn0051473	0.0173369	0.0188965
FBti0059723	0.000660068	0
FBgn0038598	0.00382905	0.00681171
FBgn0261049	0.12268	0.123064
FBgn0039337	0.205544	0.128537
FBgn0021750	0.101697	0.0606625
FBgn0037686	1.88922	1.54774
FBti0019339	0.017818	0.0115555
FBgn0038968	0.0681938	0.0510091
FBgn0263316	0.000805723	0.00856784
FBgn0039343	0	0.000875175
FBgn0038547	0.153263	0.187794
FBgn0010812	0.164082	0.0908554
FBgn0259215	0.015876	0.011301
FBgn0085331	0.00826192	0.00798
FBgn0037958	0.0279215	0.0270594
FBgn0002733	0.00418865	0.00148781
FBgn0263626	0.00320002	0.000411993
FBgn0265164	0.0461523	0.0349459
FBgn0083969	0.363052	0.433836
FBti0059720	0.412175	0.150241
FBgn0039525	0.15434	0.100063
FBgn0285963	0.660411	0.639755
FBgn0266753	0.00216189	0.00306644
FBgn0028717	0.730708	0.729256
FBgn0038307	0.380609	0.317164
FBgn0051126	0.344813	0.263214
FBgn0037543	0.0936861	0.0671694
FBgn0262081	1.03343	1.06014
FBgn0262972	0.444813	0.701478
FBgn0037688	0.064283	0.072854
FBgn0027514	0.123053	0.113792
FBgn0051040	0.148575	0.145163
FBgn0037515	0.0232346	0.00208844
FBgn0267815	0	0.00999502
FBgn0011281	0.0178355	0.0191532
FBgn0037297	0.207895	0.202173
FBgn0266137	0.57721	0.587852
FBgn0051005	0.342799	0.317337
FBgn0037473	0.133576	0.109509
FBgn0039380	1.14674	1.24964
FBgn0043005	0	0.00412325
FBgn0002941	0.0912895	0.0682764
FBgn0037810	0.190567	0.229334
FBgn0051223	0.0879811	0.0484367
FBgn0039043	0	0.000634994
FBgn0260990	0.320205	0.286579
FBgn0037646	0.103909	0.0825914
FBgn0003861	0.00272174	0.00351711
FBti0061864	0	0.00334046
FBgn0264839	0.00156411	0.00227959
FBgn0260742	0.538977	0.539997
FBgn0051248	0	0.000196657
FBgn0260462	0.519093	0.451693
FBgn0037312	0.191616	0.185639
FBti0062082	0.0482172	0.037442
FBgn0037342	0.247982	0.228525
FBgn0261004	0.0453603	0.0403759
FBgn0027376	0.00493033	0.0082261
FBgn0004049	0.872762	0.747173
FBgn0039733	0.189855	0.158739
FBgn0039209	1.35077	1.43443
FBti0019469	0.0496513	0.0095521
FBgn0267778	0.0024364	0.0018481
FBgn0038857	0.133698	0.0979171
FBgn0037696	0	0.00520118
FBgn0265380	0.00145807	0.0121785
FBgn0037655	0.549224	0.539289
FBgn0264785	0.353855	0.357135
FBgn0038925	0.732527	0.592166
FBgn0267763	0.0057401	0.0038275
FBgn0015570	0.00168687	0
FBgn0038541	0.0100816	0.00955336
FBgn0038934	0.124417	0.114748
FBgn0000477	0.0353668	0.0223463
FBgn0038236	0.0063995	0
FBgn0004595	4.60522	4.76551
FBgn0261046	1.19113	1.20502
FBgn0062442	0.907119	0.763476
FBgn0038795	0.020273	0.0143815
FBgn0038984	0.736556	0.679813
FBti0019399	0.0135026	0.00406727
FBgn0039188	0.180549	0.139639
FBgn0037900	0.107681	0.0809355
FBgn0000455	0.279045	0.176642
FBgn0038603	0.350867	0.267207
FBgn0038233	0.166879	0.197566
FBgn0039075	0.437896	0.456967
FBgn0287605	0.00958639	0.00471507
FBgn0039249	0.0735118	0.0863427
FBgn0265421	0.00759247	0.00741977
FBgn0038272	0.10649	0.0896772
FBgn0038855	0.0778158	0.0844487
FBgn0041605	3.78277	3.80663
FBgn0260487	0.0072905	0.0107983
FBgn0038194	0.0642052	0.00364533
FBgn0038039	0.251128	0.212975
FBgn0038316	0.322756	0.244498
FBgn0039730	0.416598	0.30134
FBti0019305	0.0245101	0.0345624
FBgn0038243	0.0741101	0.0176235
FBgn0028646	0.311289	0.313338
FBgn0038662	0.366584	0.333404
FBgn0029176	0.581777	0.456022
FBgn0260386	0.00935688	0.011456
FBgn0010051	0.607069	0.692923
FBti0148146	0.00691136	0.00756607
FBgn0037870	0.11477	0.000603564
FBgn0037566	0.513547	0.444765
FBgn0037736	0.826288	0.823304
FBti0062444	0.0491146	0.0220378
FBgn0016693	0.349887	0.332713
FBgn0265190	0.136031	0.118317
FBgn0261279	0.445865	0.409255
FBgn0263974	0.00759477	0.00344922
FBgn0004644	0.00121443	0.000249456
FBgn0039003	0.0738608	0.066318
FBgn0038166	0.0948718	0.0830303
FBgn0085405	0.182547	0.186832
FBgn0037238	1.37904	1.24741
FBgn0051041	0.00613144	0.00235397
FBgn0004237	0.76809	0.709551
FBgn0085376	0.367643	0.352901
FBgn0259823	0.718856	0.776034
FBgn0051036	0.00229983	0.00443599
FBgn0037643	0.974591	0.824305
FBgn0265048	0.00685115	0.0031222
FBgn0037262	0.435423	0.399262
FBgn0004882	0.48588	0.602359
FBgn0264075	0.178742	0.20504
FBgn0038705	0.00464332	0.0303972
FBgn0025456	0.0460696	0.0443706
FBgn0039628	0.00188249	0.0111229
FBgn0085412	1.23014	1.28554
FBgn0037293	0.132926	0.149772
FBgn0263782	0.180394	0.144778
FBgn0027109	0.00152129	0.0386828
FBgn0267570	0.15381	0.177647
FBgn0085431	0.00190125	0
FBgn0052855	0.00759033	0.0150509
FBgn0000071	0	0.00295225
FBgn0046114	0.304346	0.255959
FBgn0038326	0.222706	0.152789
FBgn0026257	0.0309066	0.0322497
FBgn0037931	0.147162	0.107125
FBgn0023495	0.00279911	0.00232098
FBgn0267229	0.0516122	0.0293375
FBgn0287209	0.0639393	0.00105877
FBgn0261638	0.0205849	0.0148386
FBgn0037758	0.191726	0.266766
FBti0019438	0	0.0012903
FBgn0038818	0.00297339	0.00881674
FBgn0037378	0.140331	0.111456
FBgn0039342	0.00041064	0.00402391
FBgn0039612	0.0138834	0.0226916
FBgn0015790	0.899886	0.854284
FBgn0039631	0.0904031	0.0836158
FBgn0039178	0.00202216	0.0173261
FBgn0264986	0.0119613	0.0187203
FBgn0085433	0.708392	0.653981
FBgn0037702	0.525008	0.466272
FBgn0037924	0.12854	0.106222
FBgn0027579	0.0576336	0.0527109
FBgn0086362	0.146141	0.164784
FBgn0038295	0.251302	0.350867
FBgn0029170	0.0209774	0.0123046
FBgn0261086	0.377022	0.398491
FBgn0037814	0.13867	0.146954
FBgn0037922	0.124589	0.123348
FBgn0016672	0.785829	0.654762
FBgn0028475	0.198701	0.187339
FBgn0263231	1.47229	1.50873
FBgn0001180	0.145935	0.185629
FBgn0051272	0	0.00370863
FBgn0037440	0.0443973	0.0373554
FBgn0045473	0	0.000603128
FBgn0039616	0.00398227	0.0104381
FBgn0037317	0.179856	0.176314
FBgn0039673	0.00389214	0.00682881
FBgn0013812	0	0.00172252
[truncated: 14,074 more rows]

## Sheet: Dm3
geneID	control_normalizedReadsCounts	tau P251L KI_normalizedReadsCounts
FBgn0250732	0.19579	0.188077
FBgn0037409	0.0106579	0.00612598
FBgn0027948	0.646735	0.813822
FBgn0038675	0.393426	0.301274
FBgn0000500	0.0386914	0.0416731
FBgn0037610	0.116214	0.0910943
FBgn0267571	0.246921	0.225564
FBgn0261859	0.663421	0.848564
FBgn0037363	1.46795	1.34155
FBgn0039552	0	0.0116168
FBgn0039732	0.152502	0.0992011
FBgn0038224	1.37306	1.23873
FBgn0264776	0.0344252	0.0168635
FBgn0038525	0	0
FBgn0261436	0.112585	0.0681565
FBgn0038814	0.0210218	0.0182041
FBgn0286871	0	0.000805521
FBgn0038279	0.00871684	0.0067447
FBgn0037625	0.555455	0.312465
FBti0019436	0.0157262	0.029794
FBgn0027574	0.196518	0.197852
FBgn0260746	0	0.00655551
FBgn0037930	0.142301	0.157746
FBgn0027095	0.353809	0.340807
FBgn0051450	0.521488	0.374116
FBgn0037794	0.273062	0.236513
FBgn0039229	1.23893	1.15369
FBti0019348	0.0116963	0
FBgn0038737	0.0299226	0.0350574
FBti0019411	0.0167935	0.0209723
FBti0020393	0.00886676	0.00977021
FBgn0039291	0.0253603	0.0225938
FBgn0037547	0.0176273	0.0157046
FBgn0038966	0.0294248	0.0242043
FBgn0037690	0.553342	0.413553
FBti0019321	0.00342423	0.00230846
FBgn0038055	0.220759	0.223602
FBgn0261792	0.197838	0.171263
FBgn0040606	0.0255463	0.00526107
FBgn0037709	0.0113858	0.00742092
FBti0062552	0.0312628	0.0243902
FBgn0037777	0.21608	0.133227
FBgn0046685	0.0233704	0.0246089
FBgn0039313	0.0236743	0.00527393
FBgn0004395	1.6988	1.84052
FBgn0266674	0.122787	0.0843541
FBgn0039019	0.207891	0.146427
FBgn0039172	0.366822	0.245215
RR46358-transposable-element	0.530222	0.517107
FBgn0011290	0.662181	0.613123
FBgn0267816	0	0.00204855
FBgn0037747	0.807785	0.603458
FBgn0039073	0.0174411	0.017227
FBgn0040256	0	0.00580329
FBgn0039404	0.147965	0.147928
FBgn0005674	0.124898	0.0922584
FBgn0011768	0.115846	0.0512934
FBgn0037917	0.506828	0.490591
FBgn0086365	0.00297877	0.00959552
FBgn0017567	0.744334	0.678908
FBgn0039290	0.127407	0.150372
FBti0019361	0	0
FBgn0051287	0	0
FBgn0038577	0.0710038	0.0467033
FBgn0037720	0.00971022	0.0624128
FBgn0001112	0	0.0160224
FBgn0038344	0.0892775	0.0666678
FBgn0037678	0.0396873	0.012157
FBgn0267709	0	0
RR48352-transposable-element	0	0.00794332
FBgn0051072	0.593018	0.712185
FBgn0013277	0.0646516	0
FBgn0037718	0.170081	0.156723
FBgn0286071	0	0.00624894
FBgn0265197	0.00294012	0.00455862
FBgn0003002	0.00444146	0.0438115
FBgn0041588	0.188301	0.149256
FBgn0039557	0.136794	0.134513
FBti0020309	0.00532909	0.00520503
FBgn0051028	0	0
FBgn0266598	0.0438495	0.0314211
FBgn0038725	0.541026	0.402442
FBgn0263757	0.0106487	0.0059202
FBgn0039277	0.396343	0.43699
FBgn0039302	0.337995	0.404933
FBgn0039461	0.329027	0.241075
FBgn0037894	0.0509169	0.0220219
FBgn0039817	0.0489822	0.00411931
FBgn0051224	0.697033	0.758277
FBgn0054008	0.00912613	0
FBgn0013276	2.06003	2.36183
FBgn0039714	0.346593	0.265495
FBgn0037802	0.0329959	0.0280155
FBgn0039328	0	0.00196
FBgn0051116	0.021785	0.115255
FBgn0266672	0.352484	0.273427
FBgn0037292	0	0.00191404
FBgn0017550	0.690153	0.655583
FBgn0037679	0.256535	0.236281
FBgn0040609	0	0
FBgn0038113	0.00677185	0.00228599
FBgn0014931	0	0
FBgn0267408	0.0339238	0
FBgn0038115	0.0460435	0.0353022
FBgn0038745	0.362671	0.410607
FBgn0038321	0.299708	0.297043
FBgn0263594	1.31974	1.36682
FBgn0083984	0.141732	0.057926
FBgn0015568	0.0115277	0
FBgn0038881	1.72094	1.74174
FBgn0259139	1.4758	1.23264
FBgn0039258	0.122563	0.041394
FBgn0039415	0.0083152	0.023036
FBgn0264427	0.0256634	0.0392554
FBgn0004841	0.0203297	0.0622106
FBgn0275433	0.00211729	0
FBti0019345	0.00736931	0.00368906
FBgn0002924	0.0138464	0.0108278
FBgn0051211	0.725801	0.689858
FBgn0267612	0.0111066	0.00368161
FBgn0037993	0.0557412	0.0692777
FBgn0262962	0.0594976	0.0407193
FBgn0038049	0.334668	0.298433
FBgn0005777	0.253667	0.168277
FBgn0261238	0.573763	0.645671
FBgn0037891	0.710269	0.597987
FBgn0039182	0.150223	0.0993992
FBgn0085345	0	0.000792075
FBgn0085383	1.45382	1.47968
FBgn0040080	0.182433	0.289423
FBgn0037383	0.0926746	0.0363989
FBgn0037779	0.00540699	0.00872908
FBgn0000533	0.00763551	0.00123211
FBgn0263025	0.0592419	0.0371992
FBgn0264291	0.125292	0.088137
FBti0019286	0.0142785	0.0238652
FBgn0010340	0.143474	0.125475
FBgn0039722	0	0.0402431
FBgn0038490	0.0855819	0.0492905
FBgn0265276	1.83781	1.94239
FBgn0014930	0.123643	0.081635
FBgn0038809	0.623345	0.518229
FBgn0038678	0.791392	0.645628
FBgn0037478	0.179787	0.128143
FBgn0038428	0.302853	0.215833
FBgn0038853	1.56499	1.52889
FBgn0038306	0.0981483	0.0584279
FBgn0046876	0.0152978	0
FBgn0051320	0.0390452	0.0613329
FBgn0051184	0.0705106	0.0756848
FBgn0037276	0	0.00172328
FBgn0039870	0.154635	0.102598
FBgn0003165	2.71595	2.60534
FBgn0039463	0	0.00266017
FBgn0038760	0.0516647	0.0589864
FBgn0002781	1.09233	0.855521
FBgn0039311	0.00576932	0.0693991
FBgn0038034	0.0214458	0.0658454
FBgn0053970	0.0208592	0.0248509
FBgn0038332	0.167184	0.169957
FBgn0024957	0.159697	0.125252
FBgn0023212	0.479184	0.355128
FBti0061713	0.0062465	0.00328335
FBgn0027492	2.12367	2.18638
FBgn0011289	0.411053	0.303741
FBti0019404	0	0
FBgn0015269	0.748912	0.849917
FBgn0010399	0.353857	0.449052
FBgn0266750	0.060529	0.098438
FBgn0039054	1.81836	1.87097
FBgn0286828	0.131767	0.172299
FBgn0028734	0.582781	0.692743
FBgn0039789	0	0.00124641
FBgn0037849	0.412255	0.418959
FBgn0011766	0.397639	0.647071
FBgn0267430	0.00132653	0.0108404
FBti0020308	0.00712567	0.00859273
FBgn0051510	0.557705	0.419101
FBti0019447	0.0111591	0.0102288
FBgn0038535	1.0048	0.978124
FBgn0260444	0.275545	0.183306
FBgn0038437	0.163357	0.0656184
FBgn0038369	0.380249	0.263957
FBti0019461	0.28233	0.230905
FBgn0262904	0.0121024	0.0621342
FBgn0263047	0.0373765	0.0159526
FBgn0011785	0.370321	0.393149
FBgn0037705	1.52413	1.68588
FBgn0038454	0.23886	0.249064
FBgn0260743	0.592313	0.486385
FBgn0039879	0	0
FBgn0267116	0.00271056	0.00838522
FBgn0039820	0	0
FBgn0067629	0.0330812	0.0401201
FBgn0017590	1.78329	1.84378
FBgn0039726	0.190836	0.180379
FBgn0260634	1.08414	1.14104
FBgn0037231	1.1848	1.09871
FBgn0267685	0	0.00663626
FBgn0037817	0	0.00791708
FBgn0262858	0.0192858	0.0651664
FBgn0004876	1.29237	1.17287
FBgn0039685	0.0363407	0.0530252
FBgn0004117	0.0420535	0.017857
FBgn0037811	0.00226192	0.00525478
FBgn0038354	0.01293	0.0515515
FBgn0037834	0.110845	0.11414
FBgn0003248	0.0795048	0.126807
FBgn0000723	0.00264885	0.0350438
FBgn0051030	1.48471	1.38812
FBgn0038199	0	0.00248218
FBgn0037313	0.662976	0.583611
FBgn0037890	0.695912	0.557049
FBgn0039350	0.828708	0.747714
FBgn0037546	0.612454	0.803549
FBgn0015781	0.184865	0.123791
FBgn0002522	0	0
FBgn0037737	0.538862	0.54424
FBgn0051551	0	0.0122761
FBgn0051514	0	0
FBti0019380	0.187708	0.0711232
FBgn0039215	0.197078	0.205342
FBgn0264901	0.137875	0.116177
FBgn0037943	0.235059	0.241422
FBgn0038478	0.411235	0.347025
FBgn0028684	0.296798	0.26743
FBgn0051195	0.089027	0.115002
FBgn0028487	0.238538	0.205142
FBgn0002719	0.52861	0.544238
FBgn0027841	0.127523	0.0773938
FBgn0261479	0.239798	0.0964939
FBgn0039696	0.10699	0.100412
FBgn0038331	0.564658	0.44547
FBgn0051202	0	0.00257295
FBgn0267118	0.0153896	0.0200987
FBgn0039261	0.55357	0.52638
FBgn0266744	0.0045979	0.0257664
FBgn0267337	0.0546996	0.0948333
FBgn0037746	0	0.0223547
FBgn0038854	0.100261	0.0819037
FBgn0267200	0.00822036	0.004987
FBgn0037656	0.0337191	0
FBgn0037700	0.33843	0.236211
FBgn0038839	1.36243	1.47382
FBgn0037466	0.802282	0.778824
FBti0019320	0	0.0126117
FBgn0039101	0.00565562	0.00329086
FBgn0011655	0.484109	0.431104
FBgn0039274	0.033577	0.032858
FBgn0039731	0.0572318	0.0408122
FBti0019466	0.0495426	0.0193175
FBgn0039250	0.014547	0.00772667
FBgn0015513	0.234603	0.268732
FBgn0017581	2.62527	2.74322
FBgn0020249	0.44928	0.394879
FBgn0040600	0.140266	0.35738
FBgn0024329	0.13006	0.146437
FBgn0004842	0.00530776	0.00658855
FBgn0039465	1.16878	1.20258
FBgn0013343	3.04185	2.97647
FBgn0002940	0.17795	0.11803
FBgn0027873	0.0668485	0.0936306
FBgn0038197	0.0594195	0.0618449
FBgn0039346	0.308153	0.225803
FBgn0266372	0	0.00263952
FBgn0038952	0.010304	0.0489246
FBgn0000139	0.219856	0.151287
FBgn0020238	2.8539	2.84766
FBgn0038476	0.164601	0.31674
FBgn0039341	0.0624011	0.0336113
FBgn0037850	0.0243304	0.0180906
FBgn0037908	0.169447	0.141812
FBgn0037270	1.10084	0.874402
FBgn0038540	0.312427	0.228139
FBgn0038965	0.264589	0.216367
FBgn0039609	0	0.0106948
FBgn0003268	0.0146177	0.0509421
FBgn0260935	0.189501	0.14713
FBgn0026566	0.443839	0.321922
FBgn0266700	0.009039	0.0334641
FBgn0037540	0.0476244	0.0560141
FBgn0039703	0	0
FBgn0039529	0.00591291	0.00554269
FBgn0044871	0.276393	0.174336
FBgn0039674	0.405585	0.373454
FBgn0051522	0.598146	0.672817
FBgn0283535	1.53614	1.53254
FBgn0023083	0.332254	0.374483
FBgn0037902	0.254262	0.21592
FBgn0051133	0.0121715	0.0150235
FBgn0004107	0.106987	0.081166
FBti0063150	0.0171823	0.0162784
FBgn0250823	1.85318	1.86355
FBgn0037950	0.0197509	0.0407484
FBgn0037714	0	0.00252206
RR48301-transposable-element	0.00806772	0.00184648
FBgn0037844	0.0642425	0.0458557
FBgn0267199	0	0
FBgn0037883	0.186332	0.128254
FBgn0039877	0.00675104	0.0152828
FBgn0038206	0.180982	0.150778
FBti0059759	0.0259537	0.0356831
FBgn0039764	0.145284	0.221715
FBgn0038402	0	0.00978697
FBgn0039286	0	0.0122513
FBgn0038183	0.12391	0.0691129
FBgn0038412	0.00865892	0
FBgn0038806	0.366674	0.204449
FBgn0022943	0.34669	0.186837
FBgn0005585	0.956077	0.578828
FBgn0040212	0.198577	0.215259
FBgn0053189	0	0
FBgn0040551	0.00309663	0.00820991
FBgn0261885	1.50511	1.66666
FBgn0039494	0.0678158	0.041534
FBgn0037955	0.208106	0.154492
FBgn0011701	0.0244304	0.0320162
FBgn0086253	0.024224	0.00725276
FBgn0038498	1.37762	1.34502
FBti0020312	0.00344341	0.00325932
FBti0019299	0.07002	0.110514
FBgn0038592	0.00876335	0
FBgn0063127	0.0040953	0.0124271
FBgn0038257	0.00368512	0.00661446
FBgn0263453	0	0
FBgn0264841	0	0
FBgn0015240	0.239346	0.145709
FBgn0261261	1.00057	1.05144
FBgn0039109	0.304875	0.268604
FBgn0027563	0.149722	0.0350936
FBgn0004387	0.796652	0.72424
FBgn0265068	0.00984718	0.0108573
FBgn0038195	0.859147	0.630293
FBgn0262477	2.16562	1.85146
FBgn0039543	0.086413	0.0900864
FBgn0020018	0.0222118	0.0171906
FBgn0267435	0.00252014	0
FBgn0014366	0.148746	0.0861609
FBgn0037305	0.179484	0.107637
FBgn0037670	0.161844	0.215094
FBgn0037923	0.0358722	0.039613
FBgn0264912	0.00446021	0.00391632
FBgn0037708	0.045349	0.0817081
FBgn0038589	0.0514468	0.062858
FBgn0040078	0.0508233	0.0738304
FBgn0038165	1.36914	1.31743
FBgn0037668	0.00914764	0.00134235
FBgn0266717	0.825151	1.01784
FBgn0039026	1.14151	1.17377
FBgn0039332	0.132321	0.409173
FBgn0039635	0.885216	0.658778
RR48332-transposable-element	0	0.0015647
FBgn0038029	0	0
FBgn0038755	0.373662	0.398251
FBgn0260440	0.00974844	0.0128583
FBgn0038744	0	0.0110289
FBgn0026315	0	0
FBgn0003651	1.52443	1.57396
FBti0019396	0.225274	0.751444
FBgn0085391	2.43449	2.4702
FBgn0038170	0.00401883	0.0044153
FBgn0005649	0.884516	0.982918
FBti0062875	0.0101812	0.00781436
FBgn0039536	0.849891	0.852445
FBgn0262559	1.10574	0.980867
FBgn0037326	0.754771	0.793031
FBti0020313	0.00180105	0
FBgn0037377	0.114505	0.148539
FBti0063296	0.00482517	0.00866411
FBgn0037743	0.162639	0.139941
FBgn0267702	0.01545	0.00189352
FBgn0039431	1.05817	1.26239
FBgn0038475	0.153213	0.104365
FBgn0263117	0.0870522	0.0943529
FBgn0039240	0.806715	0.854943
FBti0020323	0.0183121	0.00651045
FBgn0037815	0.0522866	0.0317273
FBgn0265422	0	0
FBti0019405	0.0579293	0.0200947
FBgn0039804	0	0.00358336
FBgn0086134	0.521121	0.30989
FBgn0027570	0.0375551	0.0272285
FBgn0037933	0.40451	0.33166
FBgn0037299	0.221387	0.166526
FBgn0037912	0.00615521	0.025296
FBgn0037279	0.195098	0.247605
FBgn0038145	0.749317	0.76611
FBgn0053293	0	0.00967032
FBgn0038740	0.341745	0.411617
FBgn0001297	1.04391	1.14986
FBgn0028968	0.254202	0.259503
FBgn0013767	0	0.432465
FBgn0040582	0.018395	0.00949584
FBgn0038390	0.012128	0.00621022
FBgn0264827	0	0
FBgn0003512	0.219319	0.211385
FBgn0024909	0.274586	0.211996
FBgn0262983	0	0.000920334
FBgn0038450	0.011882	0
FBgn0038866	0.0238552	0.0265737
FBti0019297	0.00676758	0
FBti0019431	0.0101127	0.0120916
FBgn0038894	0.00617482	0
FBgn0039876	0.131098	0.15413
FBgn0022344	0.400424	0.307468
FBgn0038989	0.120582	0.0894505
FBgn0026441	0.556069	0.708288
FBgn0038980	1.78212	1.78757
FBgn0016119	1.66733	1.345
FBgn0267753	0.00377894	0.00289
FBgn0010770	0.130937	0.12391
FBgn0038196	0.347033	0.323874
FBgn0016650	0.00356311	0.00132578
FBti0061737	0.01543	0.018454
FBgn0037354	0.141479	0.110147
FBgn0038461	0.186274	0.174587
FBgn0000246	0.251395	0.135558
FBgn0038139	0.00204294	0.00441638
FBgn0039830	2.28672	2.06356
FBgn0037848	0.328615	0.336766
FBgn0038870	0.133463	0.0862195
FBgn0086768	0.423613	0.319709
FBgn0039403	0.0232192	0.033216
FBgn0285925	2.23275	2.3564
FBgn0063649	0.441513	0.498474
FBgn0038286	1.02939	1.10873
FBgn0027494	0.0132997	0.0115078
FBgn0039272	0.0238757	0.0199778
FBgn0040682	0	0.00563
FBgn0039232	0.0102345	0.0133012
FBgn0003480	0.00486194	0.00717631
FBgn0039734	0.469615	0.38514
FBgn0051388	0.238892	0.200007
FBgn0264816	0.0947817	0.0492476
FBgn0038303	0.158035	0.100735
FBgn0051441	0.0547723	0.0271346
FBgn0038652	0.0577015	0.0507238
FBgn0039611	0.0538752	0.0115648
FBgn0000447	0.300347	0.228523
FBgn0039300	2.57703	2.33326
FBgn0263022	0.00464803	0
FBgn0039022	0.0157822	0.00176045
FBgn0039098	0.00369144	0
FBgn0039626	0.218717	0.211127
FBgn0010768	0.365528	0.406144
FBgn0039848	0	0
FBti0019296	0.0135863	0.0193799
FBgn0085308	0.00273989	0.018456
FBgn0037602	0.0739959	0.055131
FBgn0039690	0.107569	0.149118
FBgn0015402	0.1261	0.152224
FBgn0002773	0.00384229	0.00352188
FBgn0026634	0.108116	0.140373
FBgn0051217	0.0646562	0.00722783
FBgn0039379	0.157192	0.192649
FBgn0038361	0.00524877	0
FBgn0262127	0.204725	0.264272
FBgn0051019	0.00342969	0
FBgn0001321	0.00515387	0.00483979
FBti0019398	0.0261915	0.00900856
FBgn0025781	0.0239588	0.0329523
FBgn0038275	0.256939	0.146665
FBgn0039254	0.281373	0.243587
FBti0019337	0.0163116	0.0124947
FBgn0039265	0.331025	0.219844
FBgn0038697	0	0
FBgn0263738	0.0186474	0.00813425
FBgn0037680	0.158336	0.125257
FBgn0243511	0.189608	0.224831
FBgn0039682	0.566589	0.173502
FBgn0020385	0.0387962	0.0299392
FBgn0000036	2.23972	2.36579
FBgn0038313	0.152819	0.136468
FBgn0267680	0.0043564	0.00525986
FBgn0039104	0	0
FBgn0038914	0.0185451	0.00964967
FBgn0260745	0.0674429	0.223768
FBgn0038828	0.417757	0.273435
FBgn0037773	0.0508917	0.0460672
FBti0019468	0.0115013	0.00918953
FBgn0038642	0.00563931	0
FBgn0083950	2.02908	2.15897
FBti0020328	0.0760815	0.0920901
FBgn0000247	0.327463	0.265038
FBti0019429	0.0138216	0.00333679
FBgn0028374	0.0227678	0.0345492
FBgn0266408	0.00412275	0.0048425
FBgn0038619	0.173631	0.135406
FBgn0038976	0.506076	0.30036
FBgn0043884	1.36282	1.45624
FBgn0038957	0.194099	0.119314
FBgn0267801	0.00754724	0.0123254
FBgn0038247	0	0.00193033
FBgn0037213	0	0.00160154
FBgn0038827	0	0.0240015
FBgn0243512	1.55683	1.70008
FBgn0085320	0.00291622	0.00630471
FBgn0020626	0.250102	0.112
FBgn0054027	0	0.00710968
FBgn0038108	0.658872	0.692248
RR48372-transposable-element	0	0.00129548
FBgn0266418	0.172557	0.252191
FBgn0039315	0.0111573	0.00959942
FBgn0267385	1.35774	1.16726
FBgn0037443	0.870331	0.891745
FBgn0038747	0.232027	0.242431
FBgn0039638	0.0264609	0.0248535
FBgn0004901	0.00493017	0.012336
FBgn0038376	0.184048	0.165059
FBgn0038380	0.0998952	0.0738778
FBgn0039705	0.182902	0.191112
FBgn0038057	0.0770123	0.0819802
FBgn0023097	0.494499	0.498957
FBgn0083986	0.465714	0.351973
FBgn0037376	0.280006	0.171149
FBgn0037249	0.505629	0.454064
FBgn0039531	0.104883	0.101442
FBgn0039883	1.71646	1.94994
FBti0019407	0.00161158	0.0320586
FBgn0039767	0.382827	0.205235
FBgn0264491	0.014922	0.0401822
FBgn0266730	0.0104077	0.017921
FBgn0002354	0.351873	0.289649
FBgn0038143	1.31891	1.32005
FBgn0263755	0.0504841	0.0242894
FBti0020386	0	0.0487326
FBgn0001139	1.238	1.15589
FBgn0041710	0.031194	0.00524491
FBgn0045862	0.247625	0.227014
FBgn0039064	2.14728	2.32419
FBgn0038638	0.0100794	0.024283
FBgn0085382	0.627287	0.688506
FBgn0039048	0.0137968	0.0180859
FBgn0005632	0.794308	0.933487
FBgn0037439	0.117363	0.0667044
FBgn0085413	1.82708	1.98564
FBgn0039491	0	0
FBgn0039413	0.0416237	0.013329
FBgn0087013	0.476612	0.388761
FBgn0039509	0.408691	0.30476
FBgn0014342	0.043696	0.0584932
FBgn0038607	0	0
FBgn0023178	0.0126915	0.00852731
FBgn0051161	0.0592352	0.0355061
FBgn0037489	0.267966	0.21494
FBgn0037624	0.425952	0.405348
FBgn0039835	0.132234	0.12765
FBgn0259227	0.0455673	0.108662
FBgn0051361	0.958466	0.840648
FBgn0037722	0.0525997	0.0573426
FBgn0038865	0.0739443	0.016822
FBgn0039854	0.193261	0.203277
FBgn0266413	0.0038672	0.00423047
FBgn0261575	0	0.0197364
FBgn0039861	0.377553	0.3466
FBgn0038460	0.0236682	0.0289621
FBgn0026562	0.285946	0.149506
FBgn0001230	1.70916	2.02121
FBgn0010438	0.134579	0.111933
RR48405-transposable-element	0.0277498	0.0424436
FBgn0015279	0.428255	0.433921
FBgn0038149	0.0224915	0.0205605
FBgn0039233	0.0970569	0.0826421
FBgn0000015	0	0
FBgn0039622	0.00340258	0.00711047
FBgn0261550	1.27763	1.1988
FBgn0037382	0.127342	0.115939
FBgn0037573	0.159776	0.181531
FBti0019414	0.0283636	0.0515368
FBgn0016691	1.40689	1.01875
FBgn0051191	0.0465021	0.151083
FBgn0038343	0.0724828	0.00972074
FBgn0264694	0.356917	0.317076
FBgn0083985	0.0496224	0.0546457
FBgn0039023	0.0250811	0.00674915
FBgn0263979	0.252412	0.167461
FBgn0038037	0.0908282	0.0756943
FBgn0039554	0.212275	0.126217
FBgn0038071	0.0064236	0.00600823
FBgn0027539	0.139214	0.129779
FBgn0051221	1.08562	1.35885
FBgn0002921	3.83452	3.95461
FBgn0267764	0.00342696	0.0223194
FBti0019445	0.00633748	0
FBgn0039711	0.0428213	0.036593
FBgn0001215	1.33769	1.28636
FBgn0265351	0.0400401	0.0153554
FBgn0038268	0.10319	0.119613
FBgn0037698	2.01138	1.88653
FBgn0039299	0	0
FBgn0027608	2.00939	2.10216
FBgn0025808	0.0668823	0.0502752
FBgn0038981	0.00273989	0
FBgn0039338	0.615244	0.635746
FBgn0285955	0	0.0128607
FBgn0261995	0.410132	0.287624
FBgn0038716	0	0.000608345
FBgn0039538	0.0282951	0.0549546
FBgn0039360	0.100094	0.0773053
FBgn0026314	0.00775895	0.0142116
FBgn0264902	0.0169207	0.00811641
FBgn0038092	0.432877	0.294053
FBgn0011474	0.586614	0.619466
FBgn0261649	1.38539	1.25896
FBgn0037537	0.00712359	0.0154573
FBgn0038975	2.04884	2.08205
FBti0059740	0	0.00549092
FBgn0039163	0.281155	0.175765
FBgn0003257	0.00850427	0.0456205
FBgn0263390	0.0232432	0.00141007
FBgn0061476	0.00293411	0.00142584
FBgn0267233	0.0213581	0.0254527
FBgn0038330	0.454655	0.325514
FBgn0267443	0.00384597	0.00338777
FBgn0267781	0	0.00555481
FBgn0260463	0.0057157	0.00535692
FBgn0039396	0.0130589	0.0310315
FBgn0051523	0.261971	0.235602
FBgn0044826	0.690369	0.762091
FBgn0037981	0.163175	0.0820442
FBgn0037433	0.0160584	0.00203021
FBgn0039562	0.314807	0.208114
FBgn0040259	0.0396889	0.00225703
FBgn0039836	0.0645892	0.039569
FBgn0019624	1.73217	1.46549
FBgn0038849	0	0.0011047
FBgn0037338	0.0773317	0.0529171
FBgn0028688	0.196488	0.139865
FBgn0038144	0.00312359	0
FBgn0283468	0.652881	0.680589
FBgn0039802	0.522208	0.356513
FBgn0287225	0.259003	0.162055
FBgn0040493	0.0639446	0.0788826
FBti0059798	0.179883	0.0867022
FBgn0016685	0.279337	0.290781
FBgn0039136	0.317022	0.381348
FBgn0037446	0.409191	0.351445
FBgn0038721	0.111223	0.136764
FBgn0011672	0.128055	0.197816
FBti0019422	0.0796445	0.280188
FBgn0039697	0.122945	0.142249
FBgn0027518	0.0647326	0.0508799
FBgn0037873	0.956148	0.76193
FBgn0039713	2.32694	1.93455
FBgn0039602	0.44313	0.348458
FBgn0039067	0.0907612	0.10898
FBgn0039589	0.173835	0.11269
FBgn0037760	0.788422	0.904601
FBgn0039118	0.027833	0.022462
FBgn0038063	2.16108	1.9751
FBgn0039349	0.307219	0.312867
FBgn0039483	0.006817	0
FBgn0037896	0.00437855	0.00428878
FBgn0267799	0.00927929	0.0115409
FBgn0038569	0.238367	0.17028
FBgn0013813	0	0.00831125
FBgn0038546	0.576359	0.400611
FBgn0037621	0.258942	0.269594
FBgn0002937	0.0063666	0.0861049
FBgn0003169	0.639223	0.567736
FBgn0004897	0	0
FBgn0037780	0.23575	0.146378
FBgn0262582	1.99535	2.06899
FBgn0038741	0.0812779	0.0395329
FBgn0051207	0	0
FBgn0025879	0.00599454	0.108084
FBgn0040253	0.00361093	0.00311978
FBgn0085384	2.37685	2.59997
FBgn0027562	0	0.00379949
FBgn0039594	0	0.0032335
FBgn0037324	0.0157284	0.0120622
FBgn0038234	0.232097	0.140053
FBgn0039197	0.00402635	0.00102377
FBgn0019925	0.445947	0.360952
FBgn0037611	0.0670317	0.0691757
FBgn0266599	1.45847	1.31438
FBgn0039065	0.390503	0.296866
FBgn0038765	0.0458111	0.0314699
FBgn0038584	0.033378	0.0332478
FBgn0039687	0.0157009	0.00959108
FBgn0037885	0.0988188	0.0743108
FBti0019372	0.0113806	0.00403739
FBgn0266268	0.205406	0.161246
FBgn0040623	0.448316	0.310487
FBgn0051176	0.00638936	0.0159769
FBgn0051477	0.0270887	0
FBgn0039204	0.355995	0.196352
FBgn0038179	0	0
FBgn0038588	0.189236	0.158582
FBgn0037574	0.13811	0.0771666
FBgn0038878	0.00698658	0.00190866
FBgn0026576	0.382033	0.296689
FBgn0266916	0.0518212	0.0717313
FBgn0039305	0.323452	0.137939
FBgn0038014	0	0.00847252
FBgn0250910	1.34636	1.20791
FBgn0265274	0.0512831	0.119984
FBgn0263413	1.02253	0.972001
FBgn0037618	0	0
FBgn0038156	0.549391	0.607552
FBgn0267766	0	0.00216369
FBgn0026417	0.0602424	0.0119673
FBgn0038028	0	0
FBgn0001197	1.18929	0.94933
FBgn0013278	0.328326	0.354763
FBgn0039376	0	0
FBgn0024558	0.219225	0.143117
FBgn0039875	0.318049	0.280455
FBgn0037556	0.50466	0.433302
FBgn0041707	1.77289	1.7283
FBgn0037225	0.00545495	0.00927373
FBgn0004510	0.153258	0.0915808
FBgn0051140	1.79416	1.96205
FBgn0266697	0.0210461	0.0265174
FBgn0025571	0.565357	0.54832
FBti0062854	0.00595281	0.00617381
FBgn0039347	0.193361	0.189369
FBgn0086704	0.0293855	0.0298094
FBgn0037391	0.854122	0.612738
FBgn0038829	0.344895	0.251854
FBgn0000454	0.0728488	0.063494
FBgn0039348	0.190782	0.168741
RR48349-transposable-element	0.0210586	0.00256971
FBgn0037215	0.0429724	0.0190458
FBgn0037538	0.104282	0.0991825
FBti0020385	0.0233053	0.0340842
FBgn0037999	0.0109132	0
FBgn0027657	1.07275	0.78888
FBgn0038909	0.00395605	0.00986287
FBgn0038127	0.00302058	0.016598
FBgn0053207	0.654745	0.521182
FBgn0039467	0.048684	0.0510645
FBgn0267661	0	0.00468218
FBgn0020912	0	0.0125437
FBgn0004606	0.0561816	0.174815
FBgn0038771	0.208751	0.148559
FBgn0037992	0	0.00396876
FBgn0037671	1.23876	1.01443
FBgn0051345	0.249183	0.345171
FBgn0037661	0.0032782	0.0105108
FBgn0038673	0.0866701	0.0295163
FBgn0037548	0.0283389	0.00653829
FBgn0037506	0.0207909	0.0219928
FBgn0028837	0.239008	0.172033
FBgn0260794	0.957557	1.15797
FBgn0266464	0.229736	0.191979
FBgn0037622	0.119038	0.115415
FBti0019458	0.0323538	0.0169866
FBgn0037798	0.353524	0.175262
FBgn0039151	0.00671415	0.00212981
FBgn0086472	2.47069	2.23211
FBgn0082831	0.416151	0.405457
FBgn0040608	0	0
FBgn0043457	0.197045	0.165141
FBgn0039740	0.120701	0.133065
FBgn0038617	0.258461	0.191291
FBgn0037845	0	0.00526245
FBgn0270928	0.163437	0.465434
FBgn0038397	0.00725542	0.00476367
FBgn0038365	0	0.00338907
FBgn0037749	0.147679	0.0770536
FBgn0285911	0.111536	0.155535
FBgn0037290	0.00408365	0.00245658
FBgn0002626	2.33529	2.13058
FBgn0040227	0.349072	0.251588
FBgn0038447	0.00195215	0.00295702
FBgn0038438	0.217841	0.143249
FBgn0039068	0.0140373	0.0214843
FBgn0046225	0.20634	0.211456
FBgn0024289	0.0319947	0.006937
FBgn0015625	0.00592663	0.00853994
RR46410-transposable-element	0.00799545	0.0107223
FBgn0038601	0.127113	0.133294
FBgn0038271	1.32898	1.1058
FBgn0015737	0.315216	0.21226
FBgn0027524	0.0937056	0.0689637
FBgn0003507	0	0.00193767
FBgn0042106	0	0
FBgn0039471	0.00396333	0.0039049
FBti0020298	0.0642861	0.0578113
FBgn0003525	0.067982	0.0119007
FBgn0015229	2.36347	2.42366
FBgn0283499	1.59915	1.46404
FBgn0039490	0	0.00322838
FBgn0037384	0.177411	0.177286
FBgn0265082	1.95675	1.92929
FBti0019350	0	0.00302811
FBgn0037239	0.311206	0.256975
FBgn0051313	0.0170472	0.0102728
FBgn0039698	0.167071	0.165366
FBgn0037553	0.0896481	0.0161414
FBgn0038173	0.0112768	0.0104743
FBgn0265419	0.0696218	0.0711751
FBti0019326	0.0191563	0.00750315
FBgn0051125	0.135768	0.0992511
FBgn0039829	0.172586	0.139668
FBgn0010328	0.480123	0.563177
FBgn0038515	0.791571	0.817489
FBgn0039776	0.240119	0.268558
FBgn0019957	0.695591	0.55512
FBgn0000150	1.0736	0.999856
FBgn0038047	0.00805913	0.00766936
FBgn0002645	0.674444	0.764624
FBgn0004436	1.08631	1.15438
FBgn0069242	0.433654	0.313542
FBgn0083946	0	0.00403226
FBgn0038381	0.00757684	0.00647392
FBgn0051373	0.00863903	0
FBgn0044823	0.0958884	0.0613665
FBgn0053108	0.086501	0.100369
FBgn0051174	0.00615874	0.0289096
FBgn0267810	0.0169479	0.0170279
FBgn0001280	0.29488	0.282934
FBgn0016917	0.953192	0.885079
FBgn0039339	0.00532514	0.0147334
FBgn0038038	0.0640478	0.00644984
FBgn0267953	0	0
FBti0019282	0	0
FBgn0039040	0.00150772	0
FBgn0038250	0.0918353	0.00455827
FBgn0038056	0.160146	0.106634
FBti0019425	0.0148561	0.00519676
FBgn0004118	0.764511	0.588689
FBgn0026190	0	0
FBgn0003889	0.015773	0.0161724
FBgn0051550	0.441403	0.400131
FBti0062420	0.135961	0.0813847
FBgn0027865	0.664876	0.643446
RR48326-transposable-element	0.0975183	0.378434
FBgn0286507	0.0105468	0.000980952
FBgn0037672	0.170084	0.248079
FBgn0038846	0	0
FBgn0038371	0.0264669	0.00642073
FBgn0039544	0.312595	0.265137
FBgn0263750	0.0156993	0.0114248
FBgn0039846	0.0282173	0.0463907
FBgn0010247	1.42065	1.27506
FBgn0261380	0.244552	0.135823
FBgn0037762	0.0084222	0
FBgn0040588	0.00351367	0.00191583
FBgn0051436	0.00309218	0.0114546
FBgn0037703	0.0309851	0.0566774
FBgn0040208	0.19521	0.203846
FBti0059724	0	0
FBti0019390	0.00286574	0
FBgn0039252	0.198652	0.133389
FBti0019384	0.018863	0.059053
RR48318-transposable-element	0.129013	0.0786568
FBgn0038654	0.00656143	0.0115678
FBti0019393	0	0.00237426
FBgn0004369	2.11862	2.05587
FBti0019364	0.02153	0.00106938
FBgn0014869	1.24522	1.02731
FBgn0262167	0.055192	0.0554863
FBgn0051460	0.133208	0.0981811
FBgn0002632	0	0.00525973
FBgn0039145	0	0.00590899
FBti0019376	0.00628772	0.0113906
FBgn0037978	0.256793	0.257177
FBgn0037359	0.134128	0.0906397
FBgn0038211	0.0786508	0.045661
FBgn0039488	0.330766	0.239203
FBgn0039234	0.194205	0.140892
FBgn0039747	0.335087	0.0458083
FBgn0038202	0.285703	0.232267
FBgn0038597	0.0411233	0.091899
FBgn0038237	1.13727	1.07554
FBgn0010113	1.55172	1.52402
FBgn0039743	0.392567	0.375007
FBgn0038083	0.0048469	0
FBgn0038972	0.0094722	0.007025
FBgn0027620	0.44072	0.512538
FBgn0039170	0.0524256	0.0243682
FBgn0039759	0	0
FBgn0051467	0.0132369	0.0168912
FBgn0002441	0.311997	0.259194
FBgn0014141	0.0286893	0.0559487
FBgn0038251	0.190121	0.148673
FBti0061829	0	0.00282596
FBgn0025457	0.243802	0.142114
FBgn0037653	0.321104	0.196307
FBgn0038261	0.00356017	0.00367438
FBgn0039593	0.0122565	0
FBgn0039321	0.0493955	0.00494963
FBgn0266227	0.854574	0.376889
FBgn0051198	0.0179737	0
FBgn0039645	0.00431275	0.00143992
FBgn0039187	0.581056	0.509811
FBgn0037304	0.00899388	0.0213503
FBgn0037913	0.236411	0.326603
FBgn0261552	3.39156	3.53886
FBgn0038897	0.0197871	0
FBgn0037836	0	0.00283124
FBgn0266581	0.118092	0.127535
FBgn0037856	0.166916	0.111952
FBgn0038947	0.927999	0.853173
FBgn0039849	0	0.0221498
FBgn0016123	0.0105655	0.00409736
FBgn0038318	0.111889	0.128058
FBgn0039559	0.128839	0.15189
FBgn0264426	0	0
FBgn0037370	0.0522023	0.0411868
FBgn0037835	0	0.0060715
FBgn0027493	0.426959	0.343989
FBgn0261053	0	0.00438392
FBgn0037801	0	0.00589529
FBgn0051451	3.76646	4.16968
FBgn0038256	0.0181943	0.0305607
FBgn0038549	0.354959	0.320841
FBgn0004087	0	0.0128066
FBgn0037472	0.44371	0.339553
FBgn0260962	0.231368	0.234365
FBgn0037684	0	0
FBgn0038722	0.17603	0.154286
FBgn0261356	0	0
FBgn0051475	0.168818	0.182316
FBgn0039738	0.614544	0.688476
FBgn0039381	0.602742	0.571265
FBgn0037250	0.190338	0.171611
FBgn0051155	0.204701	0.156814
FBgn0027526	0.0990726	0.133205
FBgn0039271	0.0828723	0.0969738
FBgn0037607	0.230394	0.0672351
FBgn0037550	0.107498	0.112372
FBgn0038693	1.15396	1.22571
FBgn0038877	0.235783	0.334806
FBgn0039766	0.194031	0.111323
FBgn0038106	0.204471	0.139276
FBgn0003275	0.706542	0.608075
FBgn0038045	0	0.00369178
FBgn0037408	0.442451	0.156852
FBgn0038407	0	0.0030167
FBgn0039644	0.241677	0.237557
FBgn0037819	0.0108527	0.0319014
FBgn0037235	0.0931166	0.0785216
FBgn0038923	0.30098	0.203172
FBgn0037843	0.336868	0.296817
FBgn0053208	0.72917	0.748662
FBgn0087012	1.17574	1.21245
FBgn0051547	0	0.00405524
FBgn0040575	0.18433	0.182192
FBgn0039154	0.01595	0.00818664
FBgn0038805	0.185411	0.124947
FBgn0051301	0.163663	0.163756
FBgn0260722	0.318358	0.495641
FBgn0262538	0	0.0015671
FBgn0038198	0.0147458	0.00569694
FBgn0039296	0.200893	0.115449
FBgn0039344	0	0.0110165
FBgn0038435	0.0454257	0.0186818
FBgn0037683	0	0.00167793
FBgn0037371	0.0375333	0.0511507
FBgn0037345	0.137502	0.073197
FBgn0037614	0.321003	0.342196
FBgn0037525	2.22095	2.16412
FBgn0038046	0.238545	0.184852
FBgn0038536	0.0627889	0.0921785
FBgn0037330	0.225376	0.168005
FBgn0259685	0.269839	0.314885
FBgn0038946	0.0151261	0.00618892
FBgn0037533	0.848072	0.610274
FBgn0037712	0.0691313	0.0493196
FBti0019423	0.00813987	0.000973
FBgn0038953	0.0964164	0.106592
FBgn0051390	0.434417	0.30296
FBgn0038627	0.00756315	0.0284803
FBgn0027583	0.187835	0.164092
FBgn0039632	0.196647	0.132345
FBgn0037442	0.997614	0.995752
FBgn0004103	1.10955	1.04727
FBgn0039702	0.172007	0.063364
FBgn0026059	0.757232	0.919636
FBgn0039683	0.00747253	0.0177335
FBgn0046756	0.00182549	0.00271323
FBgn0039125	0.0280848	0.0267327
FBgn0038467	0.0800667	0.0125808
FBgn0010926	0.208504	0.205191
FBgn0038387	0.180771	0.150879
FBgn0037244	0.462594	0.276879
FBgn0037979	0.292579	0.224329
FBgn0038225	0	0
FBgn0015591	0.00278419	0.00206305
FBgn0037613	0.0912551	0.08384
FBgn0051262	0.00262462	0
FBgn0040528	0.0413078	0.0154362
FBgn0051183	0.308228	0.304677
FBgn0014029	0.534338	0.310962
FBgn0013949	0.193645	0.0886705
FBgn0037504	0.123678	0.144607
FBgn0037941	0.413431	0.642765
FBgn0267758	0.0081379	0
FBgn0267562	0	0.00112915
FBgn0023179	1.50447	1.44148
FBgn0051104	0	0.00229511
FBgn0046258	0	0.0135526
FBgn0038095	0.0874393	0.00287372
FBgn0038723	0.187226	0.223392
FBgn0022359	0.0680305	0.0172242
RR48350-transposable-element	0.0261419	0.0193019
FBgn0051251	0.0703651	0.0701025
FBgn0039113	0.125968	0.102024
FBgn0038277	0.00817282	0.00376283
FBgn0262473	1.0966	1.20892
FBgn0259222	0.855556	0.875183
FBgn0016120	1.40017	1.17879
FBgn0037853	0.00297466	0.00874
FBgn0262974	0.0102259	0.0806038
FBgn0038606	0.422657	0.579005
FBgn0039869	0.37715	0.295928
FBgn0026565	0	0.00284567
FBgn0037723	0.101747	0.164593
FBgn0264741	0.00342969	0.0067383
FBgn0266698	0.0119362	0
FBgn0265041	0.00508749	0.0272342
FBgn0038426	0.691199	0.611824
FBgn0037719	0.133347	0.149098
FBgn0038002	0	0
FBgn0027508	0.34206	0.311261
FBgn0003205	1.00299	0.982347
FBgn0002772	0.00568216	0.0014915
FBgn0027497	0.384295	0.345629
FBgn0039454	0	0.00316331
FBgn0038471	0.181552	0.116126
FBti0019430	0.0318552	0.0630787
FBgn0051144	0	0.00183199
FBgn0024833	0.375749	0.32432
FBgn0014879	0.379153	0.233172
FBgn0039420	0.576343	0.661283
FBgn0039210	0.363635	0.335388
FBgn0039055	0.216192	0.224079
FBgn0024330	0.384142	0.388955
FBgn0038590	0.0829373	0.0393795
FBgn0278604	0.0438333	0.045278
FBgn0024944	0.428176	0.373945
FBgn0261015	0.00656306	0.010733
FBti0019437	0.0283428	0.0173405
FBgn0039189	0.00600776	0.0156318
FBgn0054041	0	0
FBgn0266735	0	0.0059203
FBgn0002868	0.985268	0.932168
FBgn0065098	0.914376	0.33574
FBgn0051352	0.580957	0.620271
FBgn0014135	0.0109855	0.0232998
FBti0063293	0.0158411	0.0266044
FBgn0039642	0.0681904	0.0507999
FBgn0265189	0.0321708	0.0426862
FBgn0266719	0.0144653	0.0219957
FBgn0000166	0	0.0080385
FBgn0283438	0.501244	0.398061
FBgn0039680	0.0150835	0.00720156
FBgn0051445	0.0200508	0.00358582
FBgn0053329	0.009227	0
FBgn0037901	0.0374124	0.0260503
FBgn0039664	0.0906137	0.0977647
FBgn0039427	0.4609	0.299551
FBgn0022338	0.222852	0.134403
FBgn0285959	0.0388238	0.0166981
FBgn0039056	0.322053	0.326514
FBgn0051370	0	0.00222746
FBgn0022800	0.0207915	0.0127466
FBgn0267160	0.374855	0
FBgn0003479	0	0.07764
FBgn0051300	0	0.0146016
FBgn0028471	0.61154	0.538468
FBgn0051326	0.193508	0.0450569
FBgn0038110	0.117731	0.0916243
FBti0019369	0	0.0149262
FBgn0037975	0.00383961	0
FBgn0264495	1.8544	1.81154
FBgn0037726	0.00276275	0
FBgn0013576	2.48075	2.49063
FBgn0038401	0.298774	0.248682
FBgn0019972	0.0821938	0.0620655
FBgn0264005	0.0183715	0.027877
FBgn0044511	0.396519	0.434254
FBgn0038087	0.500226	0.517727
FBgn0261393	0.00579261	0.00255044
FBgn0037606	0.326641	0.315324
FBgn0037632	0.12839	0.0987126
FBgn0038054	0.0131215	0.0127345
FBgn0010803	0.144563	0.161623
FBgn0037730	0.00690296	0.00288103
FBgn0038565	0	0.0049965
FBgn0039633	1.34106	1.49037
FBgn0039110	0.167751	0.1189
FBti0061925	0.00625461	0.00646777
RR48325-transposable-element	0.0303523	0.0147845
FBgn0003867	0.0276955	0.00757037
FBgn0052944	0.366264	0.317256
FBgn0039558	0.20956	0.139556
FBgn0004618	0	0
FBgn0038013	0.149124	0.139711
FBgn0066101	0.811964	0.821577
FBgn0039169	0.152296	0.203075
FBgn0003862	1.74164	1.77356
FBgn0038840	0.0228719	0.0314107
FBgn0259113	0	0
FBgn0039580	0.259917	0.233855
FBgn0002783	0.182788	0.255082
FBgn0250746	0.297185	0.197879
RR42049-transposable-element	0	0.00320808
FBgn0051231	0	0.0035361
FBgn0015351	0.0439536	0.055676
FBgn0263662	0	0.0104356
FBgn0039203	0.0818871	0.0102954
FBgn0004587	1.88404	1.77969
FBgn0000039	0.958447	0.934785
FBgn0086346	0.509056	0.432176
FBgn0039013	0.106065	0.090088
FBgn0037792	0.126979	0.0699718
FBgn0039882	0.198382	0.164955
FBgn0262614	0.393611	0.660935
FBgn0000416	0.595239	0.639922
FBgn0039451	0.308388	0.449064
FBgn0042213	0.165373	0.127765
FBgn0010750	0.232069	0.223396
FBgn0011740	0.12314	0.169247
FBgn0037877	0.257574	0.249486
FBgn0038826	2.55183	2.48241
FBgn0051118	0.573145	0.488344
FBgn0039430	0.254695	0.374643
FBgn0039479	0.00192508	0.00092829
FBgn0038682	0.00598592	0.00499925
FBgn0039084	0	0.00481204
FBgn0039675	0	0
FBgn0038018	0	0.00284567
FBti0062874	0.00332891	0.00205681
FBgn0038929	0.104197	0.0283002
FBgn0038950	0.185248	0.0967134
FBgn0038720	0.0256533	0.0246323
FBgn0051008	0.00214579	0
FBgn0267239	0	0.00256971
FBgn0003882	0.202158	0.19087
FBgn0039647	1.97524	2.07487
FBgn0001149	0.292356	0.151471
FBgn0083949	1.22928	1.3148
FBgn0267567	0.0194011	0.00446135
FBgn0067783	0.100773	0.164796
FBgn0038400	0.978553	0.764251
FBgn0266248	0.00904082	0
RR48386-transposable-element	0.0844658	0.069493
FBti0019377	0.0140386	0.00238081
FBgn0038167	0.279384	0.242306
FBgn0038290	0.266085	0.00183817
FBgn0038788	0.19965	0.135369
FBgn0037521	1.50664	1.679
FBgn0264325	0.187945	0.158452
FBgn0019960	0.441554	0.423385
FBgn0259244	1.23916	1.34757
FBgn0004509	1.62924	1.6941
FBgn0037710	0.101299	0.0947287
FBgn0038542	0.471558	0.412286
FBgn0046247	0.726216	0.595662
FBgn0037831	0.318589	0.343358
FBgn0037465	0.239979	0.196493
FBgn0259736	0.0624818	0.0993668
FBgn0037772	0	0
FBgn0086608	0.00172595	0.0041651
FBgn0038916	0.0170594	0.00544234
FBgn0038767	0.110061	0.0916238
FBgn0005596	0.0814731	0.139623
FBgn0037315	0.140534	0.15915
FBgn0020235	1.27448	0.909501
FBgn0265159	0	0
FBgn0039158	0.114672	0.0636601
FBgn0038830	0.256314	0.154841
FBgn0260944	1.20805	0.804401
FBti0019392	0.00383961	0.0088851
FBgn0051439	0	0.0183895
FBgn0039620	0.024245	0.00373686
FBgn0037937	0	0
FBgn0040554	0	0
FBgn0085454	0	0.003209
FBgn0039266	0.401311	0.387148
FBgn0039639	0.0645349	0.0379701
FBgn0261929	0.376389	0.334258
FBgn0039532	0.301791	0.325665
FBgn0039710	0.276234	0.197111
FBgn0037757	0.0806979	0.135633
FBgn0037295	0.33116	0.265142
FBgn0085466	0	0
FBgn0038876	0.34165	0.27809
FBgn0037899	1.23281	0.998564
FBgn0039867	0.0405282	0.048933
FBgn0053213	0.065345	0.0708025
FBgn0038146	0.0555065	0.0458756
FBgn0039625	0.0548131	0.0580548
FBti0062423	0.0629753	0.0612628
FBgn0038880	0.639661	0.544937
FBgn0037754	1.14419	1.12998
FBgn0260005	0.0658558	0.112584
FBgn0026250	1.90696	1.78621
FBgn0037660	0.253383	0.240567
FBgn0037878	0.262795	0.251876
FBgn0053547	2.40845	2.45505
FBti0019470	0.0253533	0.0137047
FBgn0037356	0.0488558	0.0442735
FBgn0038738	0.103774	0.0601718
FBgn0038816	0.119331	0.156687
FBgn0004908	0.229176	0.159422
FBgn0263740	0.173549	0.168501
FBgn0038474	0.309666	0.154632
FBti0019463	0.0190511	0.0202577
FBgn0259704	0.160051	0.0689908
FBgn0005659	0	0
FBgn0015019	0.215189	0.258325
FBgn0265067	0.024332	0.0370254
FBgn0263351	0.279795	0.2706
FBgn0051374	0.00973119	0.0173646
FBgn0267757	0.00831562	0.052587
FBgn0000083	0.144316	0.219269
FBgn0039214	0.540246	0.564535
FBgn0262869	1.20695	1.43714
FBgn0011481	1.8844	1.89126
FBgn0038463	0.0504027	0.0443011
FBgn0010772	1.78629	1.71664
FBgn0038180	0	0.00213427
FBgn0037427	0	0.00240324
FBgn0004666	0.00656566	0.00273197
FBgn0037341	0.172896	0.134888
FBgn0037841	0.0553572	0.0339294
FBti0019435	0.0156895	0.0188248
FBgn0014380	0.0128581	0.0130307
FBgn0011666	3.27144	3.23412
FBgn0263650	0.0134219	0.0236199
FBgn0266745	0.00315796	0.00103363
FBgn0038735	0.425332	0.496897
FBgn0039356	0.0492827	0.0572925
FBgn0038917	0.00561139	0.0141547
FBgn0267698	0.943165	0.995123
FBgn0037583	0.00384991	0.0111798
FBgn0038446	0.331995	0.322809
FBgn0262955	0.25006	0.225985
FBgn0038429	0.131641	0.12384
FBgn0040524	0	0.00170314
FBgn0014018	0.123278	0.0810067
FBgn0039629	0.0342689	0.0191908
FBgn0037875	0.160941	0.0696994
FBgn0266673	0.151157	0.13554
RR48319-transposable-element	0.0577494	0.30717
FBgn0026380	0.41986	0.281962
FBgn0037483	0.0236338	0.00503552
FBgn0004898	0	0
FBgn0038787	0.531303	0.585228
FBgn0051457	0.0361921	0.0556423
FBgn0037619	0.0721151	0.0574774
FBgn0039117	0.0620882	0.042935
FBgn0086370	0.657404	0.565165
FBgn0037750	0	0.00343583
FBgn0038205	0	0.00712134
FBti0020307	0.0893055	0.0658923
FBgn0010877	0.667283	0.667315
FBti0019409	0.00629006	0
FBgn0263408	0	0.000480318
FBgn0266668	0.215111	0.190645
FBgn0039407	0	0.0158991
FBgn0039489	0.0787843	0.0836226
FBgn0037609	0.287079	0.151195
FBgn0037796	0.0162697	0.0147069
FBgn0000504	0.0117166	0.019419
FBgn0260793	0.691919	0.736583
FBgn0039066	0.558399	0.553345
FBgn0038974	0.10093	0.0656595
FBgn0037637	2.66691	2.28017
FBgn0039688	0.535199	0.662215
FBgn0051549	0.191392	0.171475
FBgn0051278	0.077618	0.0415409
FBgn0039504	0	0
FBgn0000659	0.16622	0.373607
FBgn0038349	0.00464803	0.0130207
FBgn0038129	0.143007	0.144892
FBgn0038766	0.0620158	0.0480987
FBgn0038868	0.349404	0.193916
FBgn0015778	1.70866	1.8405
FBgn0051103	0	0
FBgn0046214	0.585204	0.410988
FBgn0046696	0.17314	0.173587
FBgn0039355	0.0578033	0.0408966
FBti0061892	0	0.00399569
FBgn0051324	2.11775	1.98039
FBgn0037454	0.147187	0.155147
FBgn0039257	0.0387234	0.0442996
FBgn0267551	0.0807514	0.0357599
FBgn0011715	0.255268	0.222177
FBgn0037716	0.592325	0.408553
FBgn0028708	0.192521	0.157961
FBgn0038890	0.486585	0.592566
FBgn0037648	0.200059	0.156057
FBgn0037569	0.029808	0.0451117
FBgn0067628	0.0709613	0.0438696
FBgn0039402	0.325059	0.268845
FBgn0039156	0.0963378	0.0640905
FBgn0024958	0.208059	0.159586
FBgn0004359	0.00244986	0.00681259
FBgn0243514	0	0.00130709
FBgn0037707	0.277143	0.217866
FBgn0039566	0.149503	0.121846
FBgn0024222	0.00607828	0.0115908
RR48336-transposable-element	0.00465809	0.00318776
FBgn0003499	1.40212	1.10666
FBgn0037561	0.0658844	0.0398756
FBgn0039102	0.00824811	0.00236975
FBgn0038683	0.284357	0.284514
FBgn0038420	0.0406176	0.0543973
FBgn0039111	0.174397	0.10261
FBti0062083	0.0018018	0.00564813
FBgn0039137	0.108285	0.108367
FBgn0011581	0	0
FBgn0260741	0.120573	0.122409
FBgn0039120	0.393478	0.380885
FBgn0262577	0.0179119	0.0138162
FBgn0051453	0.0193677	0.0180379
FBgn0260003	1.10078	1.20334
FBgn0086378	0.727136	0.535386
FBgn0038810	0.112188	0.121554
FBti0020321	0.0172525	0.00620946
FBgn0039449	0.0128965	0.0256014
FBgn0038672	0.336684	0.288736
FBgn0037470	0.253466	0.200446
FBti0061704	0.0160255	0.00933916
FBgn0028476	0.47458	0.527655
FBgn0261285	0.804199	1.01128
FBgn0020496	2.04132	2.07639
FBgn0039581	1.02371	1.02441
FBgn0039528	0.881621	0.970926
FBgn0011336	0.190201	0.148389
FBgn0037552	0.0192621	0
FBgn0046222	0.116859	0.128901
FBgn0039689	0.18734	0.123598
FBgn0037581	0.0321654	0.0488587
FBgn0029503	0.0976912	0.0688098
FBgn0016061	2.22475	2.15983
FBgn0027930	0.125428	0.0297356
FBgn0051363	1.72491	1.49842
FBgn0267730	0.0234544	0
FBgn0262975	0.467662	0.530108
FBgn0267711	0.00378226	0
FBgn0039165	0.0686495	0.050191
FBti0019440	0.0207139	0.00380077
FBgn0262540	0.002308	0
FBgn0038551	0.291409	0.244351
FBgn0024841	0.315116	0.185997
FBti0059762	0.00293411	0.00363735
FBgn0267748	0	0.00852797
FBgn0053512	0.833899	0.820477
FBgn0260940	0.248332	0.208763
FBgn0262105	0.00685311	0.00162191
FBgn0037880	0.127453	0.038578
FBgn0000064	2.23593	2.27869
FBgn0267790	0.734987	0.656333
FBgn0037874	1.7399	1.48541
FBgn0039623	0.169177	0.172668
FBgn0267780	0	0.00260605
FBgn0042094	0.104539	0.122282
FBgn0051098	0.245184	0.177171
FBgn0038488	0.346909	0.419056
FBti0019343	0	0.00218454
FBgn0037372	0.113202	0.106088
FBgn0011476	0.480537	0.396504
FBgn0038928	0.0482769	0.0199051
FBgn0020910	1.90879	1.64305
FBgn0037612	0.0253978	0.0132556
FBgn0027578	0.126262	0.0228244
FBgn0267203	0	0
FBgn0038746	0.337307	0.310897
FBgn0038260	0	0.00155635
FBgn0263620	0.0330199	0.0273869
FBgn0011596	0.00757094	0.0156885
FBgn0039126	0.267138	0.209418
FBgn0263768	0.101454	0.0628799
FBgn0266409	1.6653	1.67577
FBgn0001138	0.013706	0.036013
FBgn0085315	0	0
FBgn0037633	0.0833365	0.0588338
FBgn0028396	0.0458574	0.00288592
FBgn0051431	0	0
FBti0020297	0.0345219	0.0371927
FBgn0263929	0.924478	1.11405
FBgn0038269	0.146731	0.12143
FBgn0040238	0.0176405	0.0806091
FBgn0039306	0.13117	0.135699
FBgn0053094	0.398182	0.373088
FBgn0037344	0.927155	0.925184
FBgn0265379	0.051727	0.0667582
FBgn0037261	1.20011	1.01829
FBgn0039312	0.0182539	0.0782688
FBgn0037755	0.504399	0.489695
FBgn0037918	0.146323	0.274002
FBgn0039801	0.0467343	0.0101347
FBgn0267431	0.027863	0.0725579
FBgn0263499	0.00185379	0.00367627
FBgn0039030	0.00983636	0.0142669
FBgn0266721	0.392345	0.320389
FBgn0037248	0.180039	0.204774
FBgn0038449	0.0030227	0
FBgn0267787	0.00832405	0.00141496
FBgn0014863	0.121394	0.157757
FBgn0039774	0.0468555	0.0573968
FBgn0029512	0.225781	0.17241
FBgn0264357	1.66496	1.64321
FBgn0002622	2.16132	1.84674
FBti0020302	0	0
FBgn0051233	0.00723162	0
FBgn0039782	0	0
FBgn0039464	0.453699	0.508219
FBgn0037944	0.228697	0.267034
FBgn0039213	0.435816	0.467367
FBgn0038099	0.00479828	0.00728804
FBti0062387	0	0.00373072
FBgn0037513	0.0256641	0.0209955
FBti0019347	0.00501276	0.0166003
FBgn0038922	0.971004	0.799965
FBgn0051100	0.024439	0.0129937
FBgn0264916	0.01384	0.0298404
FBgn0051360	0.534904	0.339167
FBgn0037759	0.0391382	0.0150551
FBgn0039225	0	0
FBgn0037325	0	0.00345234
FBgn0037578	0.055248	0.0669954
FBgn0263663	0.00500857	0.0323255
FBgn0039112	1.07534	0.794177
FBgn0037976	1.19687	1.0664
FBgn0037935	0.00261983	0.00358582
FBgn0024963	3.21022	2.97532
FBgn0038704	0.52223	0.400827
RR42085-transposable-element	0.0120693	0.00418174
FBgn0020510	0.249188	0.174532
FBgn0039723	0.207249	0.201077
FBgn0025802	0.183929	0.218565
FBgn0051244	0	0.00148283
FBgn0039735	0.247504	0.228467
FBgn0038462	0.28223	0.167411
FBgn0037635	0.037707	0.0464614
FBti0019374	0.0251894	0.022893
FBgn0038300	0.130154	0.069817
FBti0019302	0.00574175	0.0199496
FBgn0001296	0.0241498	0.0370969
FBgn0039218	0.572286	0.456659
FBgn0039140	0.374838	0.337197
FBgn0011020	0.0400231	0.0264007
FBgn0286035	0	0.00148932
FBgn0038168	0.187594	0.191989
FBgn0026400	0.228082	0.189263
FBti0019333	0	0.00169044
FBgn0038424	0.283386	0.24863
FBgn0038842	0.00199929	0.00912591
FBgn0003886	0.00421149	0
RR48374-transposable-element	0.00613846	0.00319302
FBti0019416	0.00886775	0.0217854
FBgn0046763	0.00590383	0.00754367
FBgn0083943	0	0.00676881
FBgn0037949	0.601402	0.813865
FBgn0038837	0.178147	0.363463
FBti0019401	0.021725	0.00244768
FBgn0037435	0.127598	0.0811491
FBgn0027951	0.510257	0.51076
FBgn0261599	2.28435	2.12873
FBgn0025865	0.247721	0.260164
FBgn0038595	0.00360187	0.00352737
FBgn0286516	4.05515	3.92745
FBgn0051472	0.14576	0.125271
FBgn0037763	0	0.00700562
FBgn0002906	0.174904	0.161585
FBgn0039130	0.084623	0.0676863
FBgn0266720	0.529382	0.613853
FBgn0267975	1.09757	1.04592
FBgn0038299	0.192434	0.0348321
FBgn0267157	0	0.00846375
FBgn0039595	0	0.00488833
FBgn0027090	0.109443	0.0614523
FBgn0038924	0.124066	0.0829623
FBgn0039417	0.115547	0.0883821
FBgn0037445	0.307565	0.425457
FBgn0037240	0.245608	0.289619
FBgn0039081	0.0759115	0.128664
FBgn0038858	0.0895853	0.0822073
FBgn0038491	0.286411	0.284077
FBgn0037770	0.0236178	0.0481384
FBgn0266414	1.92146	1.67849
FBgn0014022	0.228475	0.16786
FBgn0264907	0.0431012	0.116537
FBgn0037236	0.00311906	0
FBgn0037647	0.200629	0.168638
FBti0019428	0	0.00170885
FBgn0003011	0.51928	0.561802
FBgn0051481	0	0.00804682
FBgn0003137	0.0779803	0.0115119
FBgn0039132	0.914269	0.890938
FBgn0037608	0.277309	0.204478
FBgn0039419	0.09145	0.0997789
FBgn0039808	0.788851	0.812312
FBgn0086679	0.26726	0.190566
FBgn0013279	1.29934	1.1905
FBgn0263289	0.797647	0.863375
FBgn0039149	0.849738	0.785112
FBgn0051109	0.211833	0.142822
FBgn0011774	0.189463	0.123843
RR48347-transposable-element	0.092656	0.0443913
FBgn0259146	0.429445	0.417118
FBgn0025574	0.88831	0.729977
FBgn0038516	0.0105217	0
FBgn0039712	0.541149	0.336632
FBgn0038769	0.0294191	0.0179687
FBgn0038930	0.032483	0.0149418
FBgn0037765	0.0103734	0.0190591
FBti0019367	0.0129748	0.00778571
FBgn0028436	0.118085	0.116371
FBgn0020278	0.0189083	0.0333475
FBgn0039857	2.30368	1.90959
FBgn0261988	1.0426	1.05034
FBgn0037838	0.118156	0.056629
FBgn0038432	0.289659	0.207607
FBgn0039863	0.377029	0.388808
FBgn0250757	0.010398	0.0529798
FBgn0038088	0.0231559	0.0449354
FBgn0038235	0.209239	0.11511
FBgn0003134	1.27801	1.29522
FBgn0029157	0.320946	0.315534
FBgn0039124	0	0.00209913
FBgn0087005	0.0111374	0.0014189
FBgn0027654	1.11312	0.827094
FBgn0037676	1.97155	1.71951
FBgn0039492	0.781713	0.780965
FBgn0283536	2.02208	1.90197
FBgn0002431	0.523584	0.550037
FBgn0262741	0.0178766	0.0533638
FBgn0038533	0.328968	0.277317
FBgn0040071	1.22577	1.25639
FBgn0043900	0.453839	0.505225
FBgn0014006	0.121442	0.158467
FBgn0037920	0.103754	0.102779
FBgn0037336	0.66453	0.766211
FBgn0028984	0.0723259	0.0428894
FBgn0051414	0.0170791	0.00603683
FBgn0039770	1.06298	0.932267
FBgn0010389	0.0151205	0.0311712
FBgn0028833	0.83864	0.734148
FBgn0051538	0.031431	0.0431954
FBgn0039336	0.0513723	0.0457694
FBgn0263048	0.0903059	0.0820764
FBgn0051004	0	0
FBgn0004622	0.564073	0.695912
FBgn0265426	0.00332891	0
FBgn0028671	1.17669	1.11538
FBgn0038964	0.388167	0.320137
FBgn0015622	0.69392	0.585735
FBgn0038552	0.191803	0.136023
FBgn0037826	0	0.00250657
FBgn0051064	0.380757	0.493702
FBgn0039651	0	0
FBti0019402	0.0259715	0.020924
FBgn0037855	0.273087	0.237763
FBgn0264493	1.5006	1.56459
FBgn0039283	0.0119563	0.0260376
FBgn0051344	0.147917	0.124671
FBgn0024912	0.336186	0.206111
FBgn0038389	0.251282	0.182277
FBgn0262125	0.331308	0.271423
FBgn0263490	0.341134	0.370738
FBgn0263414	0.00581706	0.0110414
FBgn0264826	0.00524237	0.0045882
FBti0059775	0	0.00734132
FBgn0044810	0.00822858	0
FBgn0082582	0.617049	0.670951
FBgn0020299	0.0130206	0.102558
FBgn0037490	0.0728416	0.0363764
FBti0019301	0.00286574	0.00124186
FBgn0039094	0	0
FBgn0010774	0.892759	0.841297
FBgn0264324	0.38221	0.535503
FBgn0028670	0	0
FBgn0039006	0	0
FBgn0037332	0.254382	0.329687
FBgn0039691	0.0678045	0.0806711
FBgn0037232	0.252698	0.321514
FBgn0037667	0.034226	0.0206069
FBgn0023023	0.665771	0.610453
FBti0061797	0.00631878	0.00669304
FBgn0038862	0.205638	0.179197
FBgn0047114	0.0654466	0.0729163
FBgn0005355	0.0790609	0.0731006
FBgn0039150	0.164688	0.113603
FBgn0027512	0.339028	0.31213
FBgn0039153	0.0850225	0.0888657
FBgn0038679	0.117316	0.192099
FBgn0038581	0.197794	0.211453
FBgn0027655	0.360135	0.463283
FBgn0013953	0	0
FBgn0285937	1.15328	1.1509
FBgn0038258	0.0129904	0.0100163
FBgn0004885	0.0580187	0.0673261
FBgn0053110	0	0
FBgn0038510	0	0.0110163
FBgn0037644	0.0890993	0.103289
FBgn0039155	0	0
FBgn0039183	0.032947	0.0271815
FBgn0017577	0	0.00907755
FBgn0038811	0.128889	0.0506214
FBgn0267201	0.00356902	0.00604965
FBgn0024509	0.394531	0.329119
FBgn0053098	0	0.000675848
FBgn0051102	0.00926484	0.00769941
FBgn0010038	0	0
FBgn0038660	0.00880133	0.00933584
FBgn0262146	0.0122839	0.0068756
FBgn0037535	0.333214	0.166881
RR48337-transposable-element	0	0
FBgn0015011	0	0.00743795
FBgn0051368	0.146662	0.15234
FBgn0039329	0.0698577	0.0961913
FBgn0037617	0.106061	0.101124
FBgn0039663	0.0258854	0.0758514
FBgn0000024	2.18706	2.33457
FBti0059666	0.129494	0.205967
FBgn0045866	0.554462	0.439889
FBgn0038053	0.386181	0.287601
FBgn0266756	0.439443	0.74256
FBgn0037756	0.256209	0.232284
FBgn0051148	0.00378891	0
FBgn0037265	0.0642364	0.0541842
FBgn0039326	0.00132653	0.00127047
FBgn0000303	0.128374	0.156475
FBgn0051342	0.324073	0.342391
FBti0019394	0	0
FBgn0037251	0.185148	0.131178
FBgn0262825	0	0.00548991
FBgn0039800	0.0859723	0.0714389
RR48385-transposable-element	0.00432536	0.00785768
FBgn0262801	0.439048	0.294368
FBgn0265376	0.225117	0.284415
FBgn0051365	0.199112	0.112712
FBgn0037788	0.0822152	0.24997
FBgn0000463	0.0559553	0.0493267
FBgn0011217	1.60264	1.62654
FBgn0038609	0.0492019	0.0418657
FBgn0039640	0.0116111	0.00446214
FBgn0039555	0.292277	0.251845
FBgn0038585	0.257271	0.138396
FBgn0083991	1.39031	1.30948
FBgn0051151	0.943216	0.983924
FBgn0039886	0	0.00118214
FBgn0037536	0.441711	0.521577
FBgn0038651	0.114707	0.216985
FBgn0039212	0.253911	0.224264
FBgn0265101	0.238764	0.181013
FBgn0051216	0.0566631	0.0272576
FBgn0051279	0.00826016	0.00111924
FBgn0044812	0.0229933	0.00771679
FBgn0038583	0.205965	0.163587
FBgn0039335	0.0607167	0.0442177
FBgn0039757	2.3411	2.00103
FBgn0039241	0.0519359	0.0357241
FBgn0024432	0.802837	0.701236
FBgn0040571	0.229608	0.517322
FBgn0015331	0.0875108	0.133842
FBgn0037482	0.224166	0.255129
FBgn0038948	0.176068	0.124523
FBgn0039159	0.489203	0.380175
FBgn0286042	0.0196939	0.00762208
FBgn0038425	0.0976039	0.0780566
FBgn0039045	0.0121234	0
FBgn0040532	0.56519	1.19926
FBgn0038893	0.22086	0.136942
FBgn0022349	0.679376	0.645326
FBgn0038325	0.212975	0.126239
FBgn0038304	0.141972	0.131479
FBgn0038532	0.0848903	0.133657
FBgn0039855	0.00198913	0.00328556
FBgn0037291	0.00174909	0.00113291
FBgn0013981	2.44959	1.9866
FBgn0037687	0.018897	0.00986004
FBgn0013759	2.56994	2.53786
FBgn0038889	0.0619259	0.0622046
FBti0019334	0.00320498	0.00336444
FBgn0024555	0.820437	0.961486
FBti0020301	0.0201376	0.00300935
FBgn0261641	1.27746	1.23467
FBgn0039737	1.0144	0.64855
FBgn0086605	0.314454	0.202008
FBti0019288	0.0170146	0.00188922
RR48333-transposable-element	0	0.00355458
FBgn0022787	0.478599	0.515877
FBgn0039564	0.042377	0.00395827
FBgn0027610	0.268707	0.377455
FBgn0038388	0.330213	0.363825
FBgn0266053	0.289655	0.35118
FBgn0038653	2.34635	2.44459
FBgn0037973	0.00332633	0
FBti0019439	0.0174676	0.0164549
FBgn0038084	0.176271	0.219629
FBgn0039756	0.0203001	0
FBgn0086371	0.203783	0.177019
FBgn0024321	0.339725	0.351895
FBgn0260243	0.179746	0.119403
FBgn0259740	0.135505	0.104927
FBgn0039227	0.156258	0.16312
FBgn0038665	0.209656	0.345373
FBgn0038312	0.0736419	0.0289138
FBgn0040283	0.545927	0.632803
FBgn0015222	1.94348	1.71484
FBgn0013347	0.542625	0.461732
FBgn0038079	0	0
FBgn0037520	0	0.00910434
FBgn0037263	0.00313268	0.0180334
FBgn0051229	0.343137	0.298578
FBgn0038803	0.0622979	0.142861
FBgn0038172	0.133051	0.119356
FBgn0085438	0.0127905	0.014754
FBti0019356	0.00429554	0.00393531
FBgn0261984	0.306035	0.335375
FBgn0083975	1.12395	1.17288
FBgn0037627	0.00689703	0
FBgn0267742	0.0022501	0
FBgn0266252	0.00384303	0.00452481
FBgn0008646	0	0
FBgn0039282	0.701331	0.850674
FBgn0039017	0.0531767	0.049875
FBgn0037879	0	0.010726
FBgn0259938	0.711145	0.561782
FBgn0004597	0.164663	0.137353
FBgn0039637	0.262068	0.238946
FBgn0037589	0.0486376	0.0433999
FBgn0038872	0.475627	0.586886
FBgn0039273	0.108198	0.0905917
FBgn0039116	0.437566	0.338622
FBgn0037503	0	0
FBgn0250755	0.0342553	0.0689537
FBgn0038596	0.505915	0.375457
FBgn0037989	0.798054	0.737453
FBgn0037713	0.099104	0.0500449
FBgn0038686	0.213933	0.192003
FBgn0037778	0.0343787	0.0474039
FBgn0051469	0.0299314	0.00779697
FBgn0037615	0.00346558	0.00286565
FBgn0027338	0.843565	0.923397
FBgn0263143	0.040411	0.0376888
FBgn0266705	0.0241879	0.0116312
FBgn0003884	2.12529	1.81211
FBgn0010433	0	0.00583748
FBgn0051051	0.443214	0.265841
FBgn0262483	1.891	1.89315
FBgn0039600	1.14908	0.975547
FBgn0003339	0	0.0102191
FBgn0051111	0.111026	0.116221
FBgn0250753	1.28177	1.19177
FBgn0038472	0.193059	0.175762
FBgn0266401	0.00147517	0.00452016
FBgn0001234	5.12894	5.06821
FBgn0265140	0.474711	0.660801
FBgn0038324	0.0292009	0.0324416
FBgn0015282	0.41553	0.394287
FBgn0037652	0.185506	0.125623
FBti0020294	0.00966918	0.0290759
FBgn0003308	0.005678	0
FBgn0039294	0	0
FBgn0038282	0.995216	1.08697
FBgn0266801	2.15515	2.12749
FBgn0038608	0	0
FBgn0020407	0.0212081	0.0317844
FBgn0039452	0	0.00422913
FBgn0028992	0.210313	0.184104
FBgn0003093	1.60534	1.6738
FBgn0037280	0	0.00312935
FBgn0039099	0.0385019	0.0353703
FBgn0038845	0	0
FBgn0038427	0.306219	0.277378
FBgn0038681	0.029035	0.00127763
FBgn0039831	1.5969	1.61748
FBgn0039175	0.119803	0.0763958
FBgn0027378	0.259586	0.266705
FBgn0038593	0.108315	0.135122
FBgn0037960	0.0116042	0.00360769
FBgn0039115	0.290236	0.148289
FBgn0038327	0.0556728	0.0530971
FBgn0261928	2.01377	2.21257
FBgn0003598	0.150675	0.1197
FBgn0037398	0	0
FBgn0010355	0.321525	0.360474
FBgn0010173	0.281162	0.218665
FBgn0039736	0	0.000890608
FBti0019304	0.00986954	0.0240146
FBgn0261808	0.152422	0.121257
FBti0020330	0	0
FBgn0040534	0.532506	0.473485
FBgn0037739	0.203377	0.0815719
FBgn0038353	0.0143511	0
FBgn0053202	1.75917	1.71419
FBti0019448	0	0.00752536
FBgn0039135	0.614109	0.762267
FBgn0265420	0.0106592	0.0482705
FBgn0039844	0.800882	1.08894
FBgn0266390	0.00598854	0.0245139
FBgn0037468	0.629843	0.55267
FBgn0038080	0.257484	0.122091
FBgn0051092	0.503401	0.520697
FBgn0010313	1.138	1.1649
FBgn0038487	0	0.00238917
FBgn0042104	0	0
FBgn0011582	0.272093	0.378667
FBgn0040670	0.0403298	0.0479642
FBgn0037895	0.0330519	0.0290605
FBgn0069923	1.60469	1.40133
FBgn0051029	0.00494716	0.00177887
FBgn0040601	0	0.00163099
FBti0062536	0	0.00348826
FBgn0039678	0	0.00256004
FBgn0037638	0.088634	0.0809209
FBti0019373	0	0.00241462
FBgn0039505	0.390947	0.293301
FBgn0039816	0.805449	0.6172
FBgn0250839	1.5389	1.6455
FBgn0039788	0	0
FBgn0028468	0.0121937	0.00989773
FBgn0039862	0.71725	0.796782
FBgn0003482	0	0
FBgn0038548	0.0531715	0.0713259
FBgn0013973	0.492314	0.468324
FBgn0037892	0.355795	0.295039
FBgn0086686	1.80845	1.93236
FBgn0051473	0.0136979	0.00615795
FBti0059723	0	0
FBgn0038598	0.00344616	0.0165922
FBgn0261049	0.129684	0.108318
FBgn0039337	0.230263	0.212269
FBgn0021750	0.0911192	0.0594156
FBgn0037686	2.21339	1.89284
FBti0019339	0.0152367	0.0181361
FBgn0038968	0.0527517	0.0663238
FBgn0263316	0.00815182	0.00877768
FBgn0039343	0	0
FBgn0038547	0.0484127	0.0820467
FBgn0010812	0.0723922	0.0743224
FBgn0259215	0.0177835	0.00497367
FBgn0085331	0.00670979	0
FBgn0037958	0.0229842	0.014696
FBgn0002733	0.00718476	0.00454412
FBgn0263626	0	0.0145156
FBgn0265164	0.00500876	0.00441576
FBgn0083969	0.372366	0.456252
FBti0059720	0.102743	0.0634913
FBgn0039525	0.137381	0.105119
FBgn0285963	0.533421	0.580441
FBgn0266753	0	0.0264401
FBgn0028717	0.671147	0.719232
FBgn0038307	0.399564	0.277437
FBgn0051126	0.331969	0.254671
FBgn0037543	0.128643	0.0490005
FBgn0262081	0.964642	1.00571
FBgn0262972	0.0760201	0.243824
FBgn0037688	0.0594266	0.0709673
FBgn0027514	0.0806767	0.103368
FBgn0051040	0.20152	0.202729
FBgn0037515	0.0343973	0.00285762
FBgn0267815	0	0.00464141
FBgn0011281	0	0.00159031
FBgn0037297	0.141092	0.099429
FBgn0266137	0.836673	0.737259
FBgn0051005	0.285625	0.216678
FBgn0037473	0.196781	0.128044
FBgn0039380	1.04787	1.14779
FBgn0043005	0	0
FBgn0002941	0	0.004504
FBgn0037810	0.169859	0.184015
FBgn0051223	0.0748931	0.0603543
FBgn0039043	0.00499887	0.00449053
FBgn0260990	0.30431	0.347284
FBgn0037646	0.0206395	0.0226992
FBgn0003861	0	0.00592476
FBti0061864	0.00397798	0
FBgn0264839	0.00886959	0
FBgn0260742	0.52512	0.524542
FBgn0051248	0.135021	0.212458
FBgn0260462	0.333072	0.383456
FBgn0037312	0.206898	0.174353
FBti0062082	0.0609013	0.0123368
FBgn0037342	0.271203	0.14123
FBgn0261004	0.0441171	0.0261039
FBgn0027376	0	0.0131461
FBgn0004049	0.991868	0.746614
FBgn0039733	0.192052	0.166491
FBgn0039209	1.79423	1.75487
FBti0019469	0.0762041	0.0178141
FBgn0267778	0	0.00871867
FBgn0038857	0.192469	0.090489
FBgn0037696	0.00384303	0.00126105
FBgn0265380	0.00744032	0.016834
FBgn0037655	0.531103	0.517538
FBgn0264785	0.319064	0.409147
FBgn0038925	0.666372	0.526136
FBgn0267763	0.0278033	0.0050107
FBgn0015570	0.00304407	0
FBgn0038541	0.00718481	0.0071621
FBgn0038934	0.240111	0.252345
FBgn0000477	0.138684	0.0448662
FBgn0038236	0	0
FBgn0004595	1.2637	1.74835
FBgn0261046	0.991973	0.999074
FBgn0062442	0.78893	0.62527
FBgn0038795	0.00590383	0.00969073
FBgn0038984	0.820185	0.621129
FBti0019399	0	0.00426816
FBgn0039188	0.114305	0.100261
FBgn0037900	0.152719	0.113168
FBgn0000455	0.267458	0.206523
FBgn0038603	0.322582	0.273266
FBgn0038233	0.174803	0.200887
FBgn0039075	0.350848	0.314899
FBgn0287605	0	0.00654867
FBgn0039249	0.103716	0.0886479
FBgn0265421	0	0.00112915
FBgn0038272	0.121681	0.091583
FBgn0038855	0.0649698	0.106778
FBgn0041605	3.721	3.71998
FBgn0260487	0.00862423	0.00191224
FBgn0038194	0.147992	0.0105557
FBgn0038039	0.159536	0.155363
FBgn0038316	0.304926	0.207525
FBgn0039730	0.364455	0.354194
FBti0019305	0.0385456	0.0548612
FBgn0038243	0.082436	0.0352363
FBgn0028646	0.147512	0.152478
FBgn0038662	0.401367	0.318618
FBgn0029176	0.676712	0.527509
FBgn0260386	0.0243765	0.00293574
FBgn0010051	0.275105	0.368331
FBti0148146	0	0
FBgn0037870	0.07096	0
FBgn0037566	0.413652	0.34913
FBgn0037736	0.727418	0.781076
FBti0062444	0.0273136	0.0148716
FBgn0016693	0.305325	0.32045
FBgn0265190	0.0722972	0.117375
FBgn0261279	0.471251	0.394442
FBgn0263974	0	0.0116151
FBgn0004644	0	0.00199254
FBgn0039003	0.134996	0.0649913
FBgn0038166	0.131875	0.112146
FBgn0085405	0.120664	0.106578
FBgn0037238	1.19453	1.03975
FBgn0051041	0.00486883	0
FBgn0004237	0.628376	0.637069
FBgn0085376	0.323092	0.196205
FBgn0259823	0.584273	0.656658
FBgn0051036	0	0.0012059
FBgn0037643	0.744445	0.700008
FBgn0265048	0.0450553	0.000652089
FBgn0037262	0.597482	0.46378
FBgn0004882	0.121587	0.25353
FBgn0264075	0.225928	0.185736
FBgn0038705	0.00177725	0.00561894
FBgn0025456	0.0157395	0.0250848
FBgn0039628	0.0123004	0.00696765
FBgn0085412	1.28249	1.21074
FBgn0037293	0.144246	0.131191
FBgn0263782	0.256681	0.20902
FBgn0027109	0	0.00170885
FBgn0267570	0.0500214	0.100394
FBgn0085431	0	0.00159778
FBgn0052855	0	0.00417454
FBgn0000071	0	0.00202819
FBgn0046114	0.348841	0.272621
FBgn0038326	0.397016	0.239674
FBgn0026257	0.0272246	0.0349574
FBgn0037931	0.177734	0.1641
FBgn0023495	0	0.00162969
FBgn0267229	0	0.00867276
FBgn0287209	0.0334788	0
FBgn0261638	0	0.00147319
FBgn0037758	0.241831	0.38571
FBti0019438	0	0
FBgn0038818	0.0365923	0.0305562
FBgn0037378	0.255362	0.134414
FBgn0039342	0	0.00161934
FBgn0039612	0.0193075	0.0149581
FBgn0015790	0.890095	0.898074
FBgn0039631	0.0740064	0.0874087
FBgn0039178	0.0186122	0.0795944
FBgn0264986	0.0106304	0.00127843
FBgn0085433	0.521133	0.611107
FBgn0037702	0.418508	0.476004
FBgn0037924	0.139577	0.126888
FBgn0027579	0.116665	0.089066
FBgn0086362	0.11883	0.0995542
FBgn0038295	0.0197176	0.0690731
FBgn0029170	0	0
FBgn0261086	0.336908	0.31696
FBgn0037814	0.169637	0.106943
FBgn0037922	0.263953	0.114755
FBgn0016672	0.622622	0.527207
FBgn0028475	0.178617	0.18605
FBgn0263231	1.56631	1.49211
FBgn0001180	0.0577551	0.0694918
FBgn0051272	0	0.00532769
FBgn0037440	0.022456	0.0325761
FBgn0045473	0	0
FBgn0039616	0.0168763	0.0024852
FBgn0037317	0.238289	0.221175
FBgn0039673	0	0.012922
FBgn0013812	0.00211729	0
[truncated: 14,074 more rows]

## Sheet: T4_T5
geneID	control_normalizedReadsCounts	tau P251L KI_normalizedReadsCounts
FBgn0250732	0.19182	0.212129
FBgn0037409	0	0
FBgn0027948	0.710746	0.771959
FBgn0038675	0.416272	0.283361
FBgn0000500	0.0632159	0.0499746
FBgn0037610	0.112044	0.0834971
FBgn0267571	0.154495	0.14599
FBgn0261859	0.702958	0.834096
FBgn0037363	1.32419	1.27383
FBgn0039552	0.00411507	0.0235902
FBgn0039732	0.126113	0.114045
FBgn0038224	1.5846	1.36574
FBgn0264776	0.0635866	0.0141603
FBgn0038525	0	0
FBgn0261436	0.0389676	0.0384882
FBgn0038814	0.0290208	0.0065275
FBgn0286871	0	0
FBgn0038279	0	0.00260661
FBgn0037625	0.0686023	0.0604606
FBti0019436	0.0188635	0.0344161
FBgn0027574	0.18685	0.143957
FBgn0260746	0	0
FBgn0037930	0.00384518	0.0241699
FBgn0027095	0.22655	0.214525
FBgn0051450	0.503789	0.394902
FBgn0037794	0.273739	0.27066
FBgn0039229	1.38343	1.23561
FBti0019348	0.00363511	0
FBgn0038737	0.0658997	0.0232859
FBti0019411	0.202955	0.132537
FBti0020393	0.00160912	0.00888907
FBgn0039291	0.0415315	0.0307065
FBgn0037547	0.0244243	0.014629
FBgn0038966	0	0.01032
FBgn0037690	0.443816	0.370709
FBti0019321	0.00643838	0.00751368
FBgn0038055	0.280497	0.214065
FBgn0261792	0.0915166	0.139349
FBgn0040606	0.0410449	0.00659357
FBgn0037709	0	0.00829782
FBti0062552	0.0304096	0.0219197
FBgn0037777	0.172932	0.130026
FBgn0046685	0.0206104	0.0101767
FBgn0039313	0.0211078	0.00909969
FBgn0004395	1.38277	1.51098
FBgn0266674	0.129319	0.086526
FBgn0039019	0.260351	0.167214
FBgn0039172	0.316986	0.306166
RR46358-transposable-element	0.682882	0.585146
FBgn0011290	0.889169	0.790183
FBgn0267816	0	0.00155278
FBgn0037747	0.581668	0.521054
FBgn0039073	0.0620519	0.0218348
FBgn0040256	0.00928225	0.000983072
FBgn0039404	0.15593	0.119212
FBgn0005674	0.0915751	0.0743635
FBgn0011768	0.152953	0.0446051
FBgn0037917	0.409072	0.467679
FBgn0086365	0.00720588	0.0101421
FBgn0017567	1.00939	0.754045
FBgn0039290	0.0964451	0.131868
FBti0019361	0.00494893	0.00219916
FBgn0051287	0	0.00131828
FBgn0038577	0.0615497	0.0187751
FBgn0037720	0.0194539	0.0362969
FBgn0001112	0.0565403	0.046335
FBgn0038344	0.0644637	0.0398989
FBgn0037678	0.0211868	0.0246817
FBgn0267709	0	0.0036967
RR48352-transposable-element	0	0
FBgn0051072	0.49471	0.520122
FBgn0013277	0.0570843	0.00227997
FBgn0037718	0.191327	0.122874
FBgn0286071	0	0.00224335
FBgn0265197	0.0101381	0.0218713
FBgn0003002	0.0137724	0.0130072
FBgn0041588	0.10913	0.113576
FBgn0039557	0.12802	0.0833748
FBti0020309	0.00473136	0.0123553
FBgn0051028	0	0
FBgn0266598	0.0255441	0.020823
FBgn0038725	0.47558	0.378829
FBgn0263757	0	0
FBgn0039277	0.511484	0.39594
FBgn0039302	0.371562	0.442775
FBgn0039461	0.351356	0.282207
FBgn0037894	0.0308218	0.0323893
FBgn0039817	0	0
FBgn0051224	0.779167	0.834324
FBgn0054008	0.000534241	0.00143235
FBgn0013276	1.68117	1.97904
FBgn0039714	0.331096	0.234088
FBgn0037802	0.0706664	0.0070338
FBgn0039328	0.00178414	0.00165392
FBgn0051116	0.0356626	0.0654219
FBgn0266672	0.262658	0.234563
FBgn0037292	0	0.00485473
FBgn0017550	0.763618	0.679901
FBgn0037679	0.242776	0.227652
FBgn0040609	0.00226919	0.00124346
FBgn0038113	0	0
FBgn0014931	0	0.00333968
FBgn0267408	0.0125292	0.000865763
FBgn0038115	0.0206131	0.0139512
FBgn0038745	0.354286	0.371136
FBgn0038321	0.341279	0.293022
FBgn0263594	1.19312	1.21289
FBgn0083984	0.0731518	0.0888389
FBgn0015568	0.00827556	0.00174838
FBgn0038881	1.55749	1.58658
FBgn0259139	1.41145	1.16217
FBgn0039258	0.0757141	0.0325102
FBgn0039415	0.0102654	0.0324167
FBgn0264427	0.0227167	0.0339812
FBgn0004841	0.00239813	0.0263499
FBgn0275433	0.00484257	0.00844094
FBti0019345	0	0.00139567
FBgn0002924	0.0279191	0.0186884
FBgn0051211	0.738493	0.715008
FBgn0267612	0.000658451	0.00428308
FBgn0037993	0.021529	0.0970589
FBgn0262962	0.0947486	0.0619779
FBgn0038049	0.312979	0.287437
FBgn0005777	0.24888	0.182579
FBgn0261238	0.651429	0.698695
FBgn0037891	0.863268	0.654693
FBgn0039182	0.121176	0.126729
FBgn0085345	0.0172688	0.00654914
FBgn0085383	1.52065	1.59632
FBgn0040080	0.248099	0.153462
FBgn0037383	0.0981391	0.0484864
FBgn0037779	0.00734516	0.00162387
FBgn0000533	0	0
FBgn0263025	0.0540784	0.0266947
FBgn0264291	0.156898	0.063121
FBti0019286	0.018727	0.0245311
FBgn0010340	0.131897	0.14373
FBgn0039722	0	0.0329445
FBgn0038490	0.0599334	0.0564978
FBgn0265276	1.71468	1.83405
FBgn0014930	0.0382851	0.00490189
FBgn0038809	0.51866	0.38528
FBgn0038678	0.967022	0.776515
FBgn0037478	0.160949	0.0996637
FBgn0038428	0.322641	0.181922
FBgn0038853	2.12075	2.11682
FBgn0038306	0.0730309	0.0713392
FBgn0046876	0.00472546	0.00311614
FBgn0051320	0.0157829	0.0544277
FBgn0051184	0.093323	0.0773735
FBgn0037276	0.00312677	0.00422733
FBgn0039870	0.145967	0.0697104
FBgn0003165	2.4659	2.39711
FBgn0039463	0.00325572	0.00292033
FBgn0038760	0.0805776	0.0779892
FBgn0002781	1.10999	0.929881
FBgn0039311	0.0481823	0.101312
FBgn0038034	0.0254111	0.0110157
FBgn0053970	0.00117831	0.00584085
FBgn0038332	0.141242	0.169847
FBgn0024957	0.201326	0.166627
FBgn0023212	0.440143	0.35959
FBti0061713	0	0.00398519
FBgn0027492	2.27628	2.28721
FBgn0011289	0.382101	0.321253
FBti0019404	0.00152188	0
FBgn0015269	0.724788	0.811438
FBgn0010399	0.213358	0.284533
FBgn0266750	0.0191194	0.0821141
FBgn0039054	2.03225	2.06358
FBgn0286828	0.175914	0.154144
FBgn0028734	0.617168	0.603422
FBgn0039789	0.00112949	0.000318501
FBgn0037849	0.385739	0.418916
FBgn0011766	0.75084	0.966535
FBgn0267430	0.0156204	0.0058371
FBti0020308	0.00668048	0.00928804
FBgn0051510	0.597742	0.433924
FBti0019447	0.0471579	0.0184928
FBgn0038535	1.03407	0.956576
FBgn0260444	0.209076	0.162948
FBgn0038437	0.115436	0.0889014
FBgn0038369	0.241781	0.117139
FBti0019461	0.403612	0.294896
FBgn0262904	0.0184762	0.0389082
FBgn0263047	0.0207405	0.0111993
FBgn0011785	0.398974	0.410136
FBgn0037705	1.68875	1.82417
FBgn0038454	0.271729	0.169848
FBgn0260743	0.264715	0.256898
FBgn0039879	0	0
FBgn0267116	0.00541413	0.0087522
FBgn0039820	0	0
FBgn0067629	0.0378762	0.037917
FBgn0017590	2.28743	2.43306
FBgn0039726	0.231492	0.139209
FBgn0260634	1.18946	1.2273
FBgn0037231	0.868823	0.726797
FBgn0267685	0.101058	0.112733
FBgn0037817	0.00378972	0.00881929
FBgn0262858	0.00416659	0.00237009
FBgn0004876	1.33985	1.26417
FBgn0039685	0.0223061	0.0604915
FBgn0004117	0.0354099	0.0181773
FBgn0037811	0.00266378	0.00212958
FBgn0038354	0.014999	0.0260043
FBgn0037834	0.143956	0.0989135
FBgn0003248	0.0809626	0.0515914
FBgn0000723	0.0152655	0.0143224
FBgn0051030	1.39246	1.25474
FBgn0038199	0	0.00650932
FBgn0037313	0.685852	0.628219
FBgn0037890	0.694713	0.533842
FBgn0039350	0.799234	0.759868
FBgn0037546	0.875929	0.832288
FBgn0015781	0.167465	0.0968976
FBgn0002522	0	0
FBgn0037737	0.590078	0.627665
FBgn0051551	0.00149251	0.00748489
FBgn0051514	0	0.000311312
FBti0019380	0.24042	0.0751432
FBgn0039215	0.240152	0.23997
FBgn0264901	0.137787	0.153596
FBgn0037943	0.223998	0.246681
FBgn0038478	0.455925	0.38143
FBgn0028684	0.237484	0.215781
FBgn0051195	0.0750736	0.130514
FBgn0028487	0.212112	0.194966
FBgn0002719	0.351685	0.365289
FBgn0027841	0.0677495	0.0582151
FBgn0261479	0.158825	0.140619
FBgn0039696	0.136214	0.114749
FBgn0038331	0.574388	0.45959
FBgn0051202	0	0.00274824
FBgn0267118	0.0122603	0.00564825
FBgn0039261	0.559705	0.611726
FBgn0266744	0.00914704	0.0299436
FBgn0267337	0.102239	0.187383
FBgn0037746	0.00484115	0.0191768
FBgn0038854	0.0416414	0.0465233
FBgn0267200	0.00512482	0.00155136
FBgn0037656	0.0875556	0.0410873
FBgn0037700	0.342641	0.213386
FBgn0038839	1.31204	1.71155
FBgn0037466	0.887349	0.839877
FBti0019320	0.00220067	0.0109362
FBgn0039101	0	0.0048064
FBgn0011655	0.420491	0.512339
FBgn0039274	0.0589945	0.038389
FBgn0039731	0.0629784	0.0379725
FBti0019466	0.0373508	0.0307774
FBgn0039250	0.0130133	0.0273562
FBgn0015513	0.166271	0.185159
FBgn0017581	2.52295	2.61501
FBgn0020249	0.466751	0.421507
FBgn0040600	0.153527	0.300419
FBgn0024329	0.0774633	0.0852995
FBgn0004842	0.00676025	0
FBgn0039465	0.912755	0.990367
FBgn0013343	3.24214	3.22318
FBgn0002940	0.0117012	0.108587
FBgn0027873	0.0656331	0.123821
FBgn0038197	0	0.031547
FBgn0039346	0.423192	0.35836
FBgn0266372	0.00195035	0.0048723
FBgn0038952	0.0451778	0.0416251
FBgn0000139	0.141093	0.131529
FBgn0020238	2.71589	2.72794
FBgn0038476	0.230463	0.299303
FBgn0039341	0.0790407	0.00966202
FBgn0037850	0.00327826	0
FBgn0037908	0.106254	0.0830452
FBgn0037270	1.23801	0.967901
FBgn0038540	0.301843	0.178675
FBgn0038965	0.199407	0.201441
FBgn0039609	0.00946368	0
FBgn0003268	0.0330487	0.0229678
FBgn0260935	0.139543	0.187988
FBgn0026566	0.429647	0.214038
FBgn0266700	0.0177848	0.0314593
FBgn0037540	0.0435764	0.0616173
FBgn0039703	0	0
FBgn0039529	0	0.00318314
FBgn0044871	0.268586	0.166419
FBgn0039674	0.220009	0.20305
FBgn0051522	0.500843	0.573485
FBgn0283535	1.42668	1.4709
FBgn0023083	0.319662	0.368398
FBgn0037902	0.214389	0.15216
FBgn0051133	0.0178756	0.0254934
FBgn0004107	0.0737963	0.0790701
FBti0063150	0.026771	0.0117432
FBgn0250823	1.95655	1.93625
FBgn0037950	0.042581	0.0193829
FBgn0037714	0	0.00141243
RR48301-transposable-element	0.00301497	0.00134526
FBgn0037844	0.018332	0.00839604
FBgn0267199	0	0.00201116
FBgn0037883	0.145835	0.150607
FBgn0039877	0.00655431	0.00619289
FBgn0038206	0.127289	0.113818
FBti0059759	0.0135567	0.0457719
FBgn0039764	0.147481	0.179743
FBgn0038402	0	0.00690825
FBgn0039286	0.275683	0.346602
FBgn0038183	0.0695169	0.0454073
FBgn0038412	0.0143509	0.000311312
FBgn0038806	0.378724	0.243406
FBgn0022943	0.292819	0.195023
FBgn0005585	1.06436	0.635413
FBgn0040212	0.248156	0.237249
FBgn0053189	0.00414181	0
FBgn0040551	0.00544525	0.00189518
FBgn0261885	1.58514	1.66371
FBgn0039494	0.0926159	0.0432619
FBgn0037955	0.24138	0.159114
FBgn0011701	0.0179604	0.0480454
FBgn0086253	0.0103736	0.0105396
FBgn0038498	1.52895	1.4297
FBti0020312	0.003828	0.000540535
FBti0019299	0.0598264	0.0899665
FBgn0038592	0	0.00474876
FBgn0063127	0.00207192	0.00444114
FBgn0038257	0.00116706	0
FBgn0263453	0	0.00451513
FBgn0264841	0	0.00369099
FBgn0015240	0.154836	0.19266
FBgn0261261	0.477804	0.568945
FBgn0039109	0.270341	0.142031
FBgn0027563	0.113611	0.0166513
FBgn0004387	0.82881	0.764456
FBgn0265068	0.00910776	0.00784762
FBgn0038195	0.898284	0.757883
FBgn0262477	2.01728	1.82976
FBgn0039543	0.0642681	0.0799357
FBgn0020018	0.00877595	0.0411135
FBgn0267435	0	0.00431504
FBgn0014366	0.112551	0.0617479
FBgn0037305	0.0983841	0.0483262
FBgn0037670	0.256202	0.236538
FBgn0037923	0.0842908	0.0478138
FBgn0264912	0	0.00565488
FBgn0037708	0.0705566	0.0418409
FBgn0038589	0.0108002	0.00915446
FBgn0040078	0.0526349	0.0849128
FBgn0038165	1.25792	1.20289
FBgn0037668	0	0.0119113
FBgn0266717	0.92438	1.01394
FBgn0039026	1.27531	1.1755
FBgn0039332	0.0930896	0.411171
FBgn0039635	0.958563	0.751957
RR48332-transposable-element	0	0.00533178
FBgn0038029	0	0
FBgn0038755	0.58535	0.73728
FBgn0260440	0.00471823	0.0105258
FBgn0038744	0	0
FBgn0026315	0	0.003066
FBgn0003651	0.0346794	0.0908912
FBti0019396	0.3206	0.805502
FBgn0085391	2.85392	2.97723
FBgn0038170	0.00408378	0.00736036
FBgn0005649	0.920192	0.992696
FBti0062875	0	0.00318271
FBgn0039536	1.02283	0.868731
FBgn0262559	1.27772	1.07016
FBgn0037326	1.02507	0.932484
FBti0020313	0.00447152	0
FBgn0037377	0.161779	0.117176
FBti0063296	0.00461609	0
FBgn0037743	0.118537	0.0890592
FBgn0267702	0.00287493	0.00393127
FBgn0039431	1.09164	1.20068
FBgn0038475	0.159631	0.123975
FBgn0263117	0.085086	0.0670885
FBgn0039240	0.668432	0.688719
FBti0020323	0.011817	0.0220895
FBgn0037815	0.0452029	0.0195056
FBgn0265422	0	0
FBti0019405	0.0101361	0.0133028
FBgn0039804	0	0.00201116
FBgn0086134	0.404009	0.313995
FBgn0027570	0.0159557	0.0121048
FBgn0037933	0.536184	0.357647
FBgn0037299	0.187489	0.0997995
FBgn0037912	0.0123377	0.013128
FBgn0037279	0.214843	0.199723
FBgn0038145	0.893829	0.829846
FBgn0053293	0	0.00628647
FBgn0038740	0.383921	0.48691
FBgn0001297	0.4622	0.592746
FBgn0028968	0.229053	0.198031
FBgn0013767	0.0108766	0
FBgn0040582	0.00924467	0
FBgn0038390	0.00558984	0.00512411
FBgn0264827	0	0
FBgn0003512	0.221565	0.179504
FBgn0024909	0.172859	0.204272
FBgn0262983	0	0.00341699
FBgn0038450	0.0360343	0.00148272
FBgn0038866	0.0180461	0.0195116
FBti0019297	0	0.00312049
FBti0019431	0.00774806	0.0171168
FBgn0038894	0	0.00472079
FBgn0039876	0.150691	0.116378
FBgn0022344	0.413868	0.326765
FBgn0038989	0.0921302	0.065432
FBgn0026441	0.522209	0.580863
FBgn0038980	0.108287	0.214165
FBgn0016119	1.716	1.39805
FBgn0267753	0.00246172	0.0171492
FBgn0010770	0.147547	0.105304
FBgn0038196	0.305681	0.290369
FBgn0016650	0	0.0137537
FBti0061737	0.018767	0.0147444
FBgn0037354	0.103707	0.073436
FBgn0038461	0.192395	0.188008
FBgn0000246	0.147749	0.107262
FBgn0038139	0.00135289	0.00611243
FBgn0039830	2.52867	2.26615
FBgn0037848	0.247823	0.286945
FBgn0038870	0.0868982	0.0565247
FBgn0086768	0.312546	0.270339
FBgn0039403	0.0191355	0.0138266
FBgn0285925	2.5424	2.57566
FBgn0063649	0.0835691	0.18225
FBgn0038286	0.973728	0.934868
FBgn0027494	0.00992169	0.0131163
FBgn0039272	0.0244841	0.034666
FBgn0040682	0	0.0116958
FBgn0039232	0.0161365	0.0618701
FBgn0003480	0.0381387	0.0217774
FBgn0039734	0.487847	0.444204
FBgn0051388	0.238277	0.18491
FBgn0264816	0.0656989	0.0579372
FBgn0038303	0.140313	0.105763
FBgn0051441	0.0366237	0.0496642
FBgn0038652	0.0151265	0.00196349
FBgn0039611	0.0286622	0.0188271
FBgn0000447	0.269712	0.180991
FBgn0039300	2.33455	2.08791
FBgn0263022	0	0
FBgn0039022	0.021639	0.0103864
FBgn0039098	0	0.00209409
FBgn0039626	0.272305	0.237271
FBgn0010768	0.388782	0.296793
FBgn0039848	0.00846558	0
FBti0019296	0.022098	0.0254398
FBgn0085308	0.0197947	0.0166652
FBgn0037602	0.0413323	0.0565742
FBgn0039690	0.142578	0.164603
FBgn0015402	0.159707	0.156979
FBgn0002773	0.00340798	0.00934264
FBgn0026634	0.142915	0.10767
FBgn0051217	0.0593653	0.0105341
FBgn0039379	0.155091	0.15259
FBgn0038361	0	0.00512777
FBgn0262127	0.336402	0.44601
FBgn0051019	0	0
FBgn0001321	0.00816801	0.00060788
FBti0019398	0.0235361	0.00444083
FBgn0025781	0.068338	0.0219383
FBgn0038275	0.258903	0.161783
FBgn0039254	0.254633	0.225167
FBti0019337	0.0119391	0.023417
FBgn0039265	0.323428	0.210538
FBgn0038697	0	0
FBgn0263738	0.0398688	0.0284487
FBgn0037680	0.106555	0.102863
FBgn0243511	0.172867	0.17382
FBgn0039682	0.540371	0.168927
FBgn0020385	0.055061	0.0206583
FBgn0000036	1.82964	1.91413
FBgn0038313	0.169278	0.0930763
FBgn0267680	0.0144792	0.0170439
FBgn0039104	0	0
FBgn0038914	0.0271684	0.011667
FBgn0260745	0.020647	0.164546
FBgn0038828	0.558149	0.405388
FBgn0037773	0.0944107	0.0446483
FBti0019468	0.00727516	0.00639613
FBgn0038642	0.00535652	0.00270822
FBgn0083950	1.52681	1.68391
FBti0020328	0.0387976	0.0511952
FBgn0000247	0.272802	0.252056
FBti0019429	0.0146429	0.00411262
FBgn0028374	0.0457507	0.0567127
FBgn0266408	0.00439141	0.00875367
FBgn0038619	0.183463	0.133921
FBgn0038976	0.274313	0.193698
FBgn0043884	1.49051	1.54638
FBgn0038957	0.068385	0.0625416
FBgn0267801	0	0.00052381
FBgn0038247	0.00175116	0.00883567
FBgn0037213	0	0.00441778
FBgn0038827	0	0.0325783
FBgn0243512	0.306557	0.539606
FBgn0085320	0	0
FBgn0020626	0.152122	0.177038
FBgn0054027	0.0221956	0.0063132
FBgn0038108	0.672984	0.716825
RR48372-transposable-element	0.00221741	0.000340018
FBgn0266418	0.988135	0.952965
FBgn0039315	0	0
FBgn0267385	1.12326	1.10354
FBgn0037443	0.729579	0.766584
FBgn0038747	0.22065	0.19125
FBgn0039638	0.020402	0.0171549
FBgn0004901	0.00385026	0.00398959
FBgn0038376	0.218188	0.131082
FBgn0038380	0	0.00913941
FBgn0039705	0.1877	0.136374
FBgn0038057	0.0394791	0.045636
FBgn0023097	0.552319	0.525228
FBgn0083986	0.513634	0.350233
FBgn0037376	0.259606	0.104842
FBgn0037249	0.620243	0.559298
FBgn0039531	0.0950662	0.10409
FBgn0039883	2.10356	2.17883
FBti0019407	0.00652326	0.0179599
FBgn0039767	0.20971	0.179966
FBgn0264491	0.0286034	0.0482777
FBgn0266730	0.013856	0.0226671
FBgn0002354	0.249477	0.1876
FBgn0038143	1.37155	1.40728
FBgn0263755	0.0188128	0.00674494
FBti0020386	0.00692975	0.0378192
FBgn0001139	1.22919	1.16295
FBgn0041710	0.0404994	0.0102022
FBgn0045862	0.246236	0.185826
FBgn0039064	2.4878	2.60761
FBgn0038638	0.00760967	0.0124733
FBgn0085382	1.19208	1.08164
FBgn0039048	0.0334704	0.0245244
FBgn0005632	0.930951	0.917746
FBgn0037439	0.0774625	0.0753912
FBgn0085413	2.04804	2.10048
FBgn0039491	0.00262298	0.00681444
FBgn0039413	0.0506452	0.0063774
FBgn0087013	0.409986	0.387194
FBgn0039509	0.278683	0.242335
FBgn0014342	0.0386819	0.057852
FBgn0038607	0	0
FBgn0023178	0.00661435	0.00774936
FBgn0051161	0.0293125	0.0416064
FBgn0037489	0.232733	0.198541
FBgn0037624	0.366869	0.428016
FBgn0039835	0.171594	0.144064
FBgn0259227	0.847844	0.803626
FBgn0051361	0.651118	0.708883
FBgn0037722	0.0403181	0.061255
FBgn0038865	0.0373528	0.0027721
FBgn0039854	0.143892	0.102648
FBgn0266413	0.00200823	0.000922978
FBgn0261575	0.0149169	0
FBgn0039861	0.500558	0.355345
FBgn0038460	0.00227055	0.00923269
FBgn0026562	0.325886	0.159061
FBgn0001230	1.44332	1.77447
FBgn0010438	0.110804	0.0628235
RR48405-transposable-element	0.0411909	0.0459639
FBgn0015279	0.386564	0.381371
FBgn0038149	0.0209938	0.0153773
FBgn0039233	0.0611315	0.0386494
FBgn0000015	0.00158027	0.0046142
FBgn0039622	0.00612922	0
FBgn0261550	1.67474	1.39464
FBgn0037382	0.105364	0.119662
FBgn0037573	0.217277	0.230932
FBti0019414	0.0133968	0.0544068
FBgn0016691	1.32407	0.946506
FBgn0051191	0.0360312	0.065267
FBgn0038343	0.0114069	0.0214604
FBgn0264694	0.260974	0.196526
FBgn0083985	0.0672832	0.0307239
FBgn0039023	0.0171568	0.000696774
FBgn0263979	0.236932	0.167066
FBgn0038037	0.0363512	0.0818835
FBgn0039554	0.154388	0.161348
FBgn0038071	0.00552464	0.00448305
FBgn0027539	0.132932	0.137294
FBgn0051221	4.68963	4.76649
FBgn0002921	4.11639	4.16236
FBgn0267764	0.0122689	0.0122674
FBti0019445	0	0.00443207
FBgn0039711	0.0135308	0.0180997
FBgn0001215	1.52562	1.41272
FBgn0265351	0.0327928	0.0287355
FBgn0038268	0.0869629	0.100651
FBgn0037698	2.4428	2.36734
FBgn0039299	0.00759608	0
FBgn0027608	2.18275	2.20029
FBgn0025808	0.0398887	0.0372884
FBgn0038981	0.00304389	0.00665531
FBgn0039338	0.721896	0.786082
FBgn0285955	0.00307102	0.00103068
FBgn0261995	0.304391	0.251113
FBgn0038716	0	0.00143788
FBgn0039538	0.043134	0.0381202
FBgn0039360	0.206857	0.158116
FBgn0026314	0.00708629	0.00520857
FBgn0264902	0.0231432	0.00524599
FBgn0038092	0.0164735	0.00881172
FBgn0011474	0.510303	0.576961
FBgn0261649	1.00785	1.00736
FBgn0037537	0.0172519	0.00166501
FBgn0038975	2.14881	2.12365
FBti0059740	0.00312162	0.00411953
FBgn0039163	0.271574	0.173895
FBgn0003257	0.0288881	0.034907
FBgn0263390	0.0185064	0.0856431
FBgn0061476	0	0.00156694
FBgn0267233	0.0329073	0.0620256
FBgn0038330	0.513381	0.385472
FBgn0267443	0	0.000958612
FBgn0267781	0.00385524	0.0100477
FBgn0260463	0.00284934	0.00215674
FBgn0039396	0.0057117	0.0353277
FBgn0051523	0.155556	0.137105
FBgn0044826	0.469556	0.583274
FBgn0037981	0.101119	0.11384
FBgn0037433	0	0.00659683
FBgn0039562	0.279471	0.200868
FBgn0040259	0.034439	0.00288297
FBgn0039836	0.0875732	0.0284154
FBgn0019624	1.79788	1.49924
FBgn0038849	0.00403594	0.00421178
FBgn0037338	0.0390354	0.0599549
FBgn0028688	0.12781	0.142312
FBgn0038144	0	0.00618355
FBgn0283468	0.564214	0.631634
FBgn0039802	0.393181	0.257159
FBgn0287225	0.147411	0.138002
FBgn0040493	0.0474703	0.0363967
FBti0059798	0.100128	0.0928821
FBgn0016685	0.262123	0.212091
FBgn0039136	0.235914	0.362103
FBgn0037446	0.289956	0.387074
FBgn0038721	0.0934981	0.0716632
FBgn0011672	0.221921	0.193319
FBti0019422	0.222777	0.367404
FBgn0039697	0.0982515	0.0892063
FBgn0027518	0.0789584	0.0581585
FBgn0037873	1.04963	0.748194
FBgn0039713	2.31482	1.87323
FBgn0039602	0.428223	0.35834
FBgn0039067	0.102238	0.0894668
FBgn0039589	0.143611	0.0964056
FBgn0037760	0.806379	0.910238
FBgn0039118	0.0212679	0.0145272
FBgn0038063	2.38847	2.21923
FBgn0039349	0.474004	0.42693
FBgn0039483	0	0.00279989
FBgn0037896	0	0.00247849
FBgn0267799	0	0.000537545
FBgn0038569	0.145417	0.186114
FBgn0013813	0	0.00234702
FBgn0038546	0.543183	0.430528
FBgn0037621	0.279908	0.183873
FBgn0002937	0	0.104173
FBgn0003169	0.717436	0.757534
FBgn0004897	0	0
FBgn0037780	0.233647	0.19611
FBgn0262582	2.61501	2.61033
FBgn0038741	0.0664082	0.0232407
FBgn0051207	0	0.00625156
FBgn0025879	0.0561275	0.0863726
FBgn0040253	0	0
FBgn0085384	0.780347	0.741325
FBgn0027562	0.00161461	0.00383725
FBgn0039594	0.014121	0.00478661
FBgn0037324	0	0
FBgn0038234	0.183536	0.189205
FBgn0039197	0	0.00172892
FBgn0019925	0.414522	0.314003
FBgn0037611	0.0661815	0.0503479
FBgn0266599	1.2332	1.10974
FBgn0039065	0.354246	0.318339
FBgn0038765	0.0615533	0.0360109
FBgn0038584	0.0189267	0.0200578
FBgn0039687	0.0408547	0.0176604
FBgn0037885	0.140724	0.0954732
FBti0019372	0.0094262	0
FBgn0266268	0.14659	0.137901
FBgn0040623	0.409681	0.255004
FBgn0051176	0.0261169	0.0224913
FBgn0051477	0.0236062	0.000937695
FBgn0039204	0.246003	0.206455
FBgn0038179	0.00216545	0.00119556
FBgn0038588	0.14575	0.187737
FBgn0037574	0.11165	0.101325
FBgn0038878	0	0.00106863
FBgn0026576	0.336137	0.225751
FBgn0266916	0.0625685	0.0472912
FBgn0039305	0.188681	0.151456
FBgn0038014	0.0050397	0.00233861
FBgn0250910	0.965836	1.01
FBgn0265274	0.0657033	0.143283
FBgn0263413	1.18023	1.00769
FBgn0037618	0	0
FBgn0038156	0.527483	0.568889
FBgn0267766	0.000616059	0.00103738
FBgn0026417	0.0289705	0.0239117
FBgn0038028	0	0
FBgn0001197	1.24261	1.03616
FBgn0013278	0.251934	0.263187
FBgn0039376	0	0
FBgn0024558	0.192602	0.0766855
FBgn0039875	0.298547	0.224797
FBgn0037556	0.476221	0.509631
FBgn0041707	1.57292	1.49526
FBgn0037225	0.00575103	0
FBgn0004510	0.0867451	0.0714056
FBgn0051140	1.71223	1.86221
FBgn0266697	0.0124526	0.0316328
FBgn0025571	0.634447	0.490589
FBti0062854	0.000780836	0.00212787
FBgn0039347	0.313035	0.289521
FBgn0086704	0.067247	0.0639582
FBgn0037391	0.65863	0.525309
FBgn0038829	0.341017	0.228584
FBgn0000454	0.022073	0.0550471
FBgn0039348	0.191152	0.153149
RR48349-transposable-element	0.0103373	0.00363661
FBgn0037215	0.0149783	0.0275968
FBgn0037538	0.122797	0.0687458
FBti0020385	0.0132664	0.0120887
FBgn0037999	0.0121511	0.00426372
FBgn0027657	0.0898379	0.115421
FBgn0038909	0.00146481	0.000311312
FBgn0038127	0.0238394	0.00905946
FBgn0053207	0.101779	0.171669
FBgn0039467	0.00212299	0.00335857
FBgn0267661	0.00102667	0.00235444
FBgn0020912	0.00500916	0
FBgn0004606	0.0083703	0.0768753
FBgn0038771	0.177366	0.111964
FBgn0037992	0	0.00523805
FBgn0037671	1.23966	0.908836
FBgn0051345	0.118694	0.0218191
FBgn0037661	0.0015078	0
FBgn0038673	0.024875	0.0594354
FBgn0037548	0.0335661	0.00418171
FBgn0037506	0.0283827	0.032764
FBgn0028837	0.148794	0.157195
FBgn0260794	1.06572	1.1362
FBgn0266464	0.289394	0.169211
FBgn0037622	0.134653	0.0889888
FBti0019458	0.0178953	0.0187555
FBgn0037798	0.262427	0.182415
FBgn0039151	0.029901	0
FBgn0086472	2.45409	2.23239
FBgn0082831	0.438976	0.378177
FBgn0040608	0.0051916	0.000542372
FBgn0043457	0.16581	0.174457
FBgn0039740	0.131453	0.0828528
FBgn0038617	0.192662	0.108672
FBgn0037845	0.0038525	0
FBgn0270928	2.5739	2.63653
FBgn0038397	0	0.00743352
FBgn0038365	0.00222001	0.00759526
FBgn0037749	0.0783036	0.0706013
FBgn0285911	0.129354	0.160324
FBgn0037290	0.00360237	0.00427252
FBgn0002626	2.14587	2.06894
FBgn0040227	0.466484	0.287926
FBgn0038447	0.00251132	0.00134284
FBgn0038438	0.153925	0.116198
FBgn0039068	0.0467418	0.0321952
FBgn0046225	0.513551	0.425492
FBgn0024289	0.0151231	0.00292065
FBgn0015625	0.00750391	0.0211146
RR46410-transposable-element	0.00312162	0.00984388
FBgn0038601	0.082888	0.106604
FBgn0038271	1.54515	1.26854
FBgn0015737	0.389044	0.181554
FBgn0027524	0.108119	0.0847836
FBgn0003507	0.00500082	0.01081
FBgn0042106	0	0.00448617
FBgn0039471	0.00181056	0.00556114
FBti0020298	0.0681276	0.0592766
FBgn0003525	0.102905	0.00440475
FBgn0015229	1.81999	1.92994
FBgn0283499	1.25374	1.24426
FBgn0039490	0	0.00069808
FBgn0037384	0.210865	0.186885
FBgn0265082	1.59717	1.74481
FBti0019350	0.0675174	0.0768772
FBgn0037239	0.153648	0.156034
FBgn0051313	0.038967	0.0129738
FBgn0039698	0.166254	0.161238
FBgn0037553	0.0622343	0.0090862
FBgn0038173	0.00838861	0.0184345
FBgn0265419	0.0014035	0.00258039
FBti0019326	0.0246179	0.00916841
FBgn0051125	0.10584	0.0941061
FBgn0039829	0.21661	0.117982
FBgn0010328	0.54116	0.647421
FBgn0038515	0.755966	0.790852
FBgn0039776	0.280524	0.306891
FBgn0019957	0.890256	0.705907
FBgn0000150	1.00402	0.852641
FBgn0038047	0	0.00958711
FBgn0002645	0.552767	0.685384
FBgn0004436	0.899743	0.937926
FBgn0069242	0.315432	0.233073
FBgn0083946	0	0.00580743
FBgn0038381	0.00404455	0.00194805
FBgn0051373	0	0
FBgn0044823	0.115799	0.0814002
FBgn0053108	0.0878038	0.0804432
FBgn0051174	0.0230139	0.040778
FBgn0267810	0.0196279	0.0243885
FBgn0001280	0.281312	0.221565
FBgn0016917	0.536971	0.524044
FBgn0039339	0.00901826	0.0181344
FBgn0038038	0.0712785	0.00187451
FBgn0267953	0	0
FBti0019282	0	0
FBgn0039040	0.00945797	0
FBgn0038250	0.136592	0.00634927
FBgn0038056	0.207166	0.133633
FBti0019425	0.00368862	0.00248082
FBgn0004118	0.835813	0.771901
FBgn0026190	0	0.0039265
FBgn0003889	0.0111393	0.0208765
FBgn0051550	0.42906	0.40146
FBti0062420	0.109906	0.0850236
FBgn0027865	0.67092	0.666642
RR48326-transposable-element	0.153349	0.385826
FBgn0286507	0.002245	0.00343729
FBgn0037672	0.134207	0.125069
FBgn0038846	0	0
FBgn0038371	0.0103516	0.0021753
FBgn0039544	0.264172	0.2919
FBgn0263750	0.00571111	0.0057919
FBgn0039846	0.0332164	0.0262491
FBgn0010247	1.56477	1.35904
FBgn0261380	0.257356	0.161852
FBgn0037762	0.0158707	0
FBgn0040588	0	0.00927175
FBgn0051436	0.0035484	0.00210197
FBgn0037703	0.0528175	0.0673182
FBgn0040208	0.202861	0.22984
FBti0059724	0	0
FBti0019390	0.0027947	0.00995228
FBgn0039252	0.219731	0.144837
FBti0019384	0.01812	0.039626
RR48318-transposable-element	0.150404	0.0927223
FBgn0038654	0	0
FBti0019393	0.00296065	0
FBgn0004369	2.35637	2.22154
FBti0019364	0	0.00894856
FBgn0014869	0.722828	0.703292
FBgn0262167	0.0755143	0.106239
FBgn0051460	0.114626	0.0618893
FBgn0002632	0.00569485	0.00189518
FBgn0039145	0.00639717	0.0114096
FBti0019376	0	0.00173616
FBgn0037978	0.225599	0.1683
FBgn0037359	0.135157	0.10135
FBgn0038211	0.0842557	0.0191366
FBgn0039488	0.298798	0.193063
FBgn0039234	0.154839	0.0959119
FBgn0039747	0.00591077	0.00721406
FBgn0038202	0.285792	0.227915
FBgn0038597	0.081015	0.0700826
FBgn0038237	2.44992	2.23498
FBgn0010113	1.79324	1.90503
FBgn0039743	0.313139	0.288605
FBgn0038083	0.00519029	0
FBgn0038972	0.00804459	0.00502268
FBgn0027620	0.605576	0.516613
FBgn0039170	0.0269356	0.0457788
FBgn0039759	0	0
FBgn0051467	0.0208999	0.0058781
FBgn0002441	0.430784	0.285535
FBgn0014141	0.0466212	0.0414603
FBgn0038251	0.242781	0.230326
FBti0061829	0.00142354	0.0107894
FBgn0025457	0.102642	0.0627308
FBgn0037653	0.256595	0.21469
FBgn0038261	0.00113729	0.00531092
FBgn0039593	0.0169171	0.00284782
FBgn0039321	0.0112637	0.018026
FBgn0266227	0.937319	0.46065
FBgn0051198	0.00595666	0.00242338
FBgn0039645	0.00166206	0.00404834
FBgn0039187	0.621761	0.551446
FBgn0037304	0.0261483	0.0178948
FBgn0037913	0.073729	0.259406
FBgn0261552	3.60001	3.73477
FBgn0038897	0.0442403	0.00289043
FBgn0037836	0.00155434	0.0185861
FBgn0266581	0.0882882	0.104163
FBgn0037856	0.0985417	0.086447
FBgn0038947	0.831782	0.752588
FBgn0039849	0.0281757	0.0205571
FBgn0016123	0.015149	0.00821685
FBgn0038318	0.274041	0.22846
FBgn0039559	0.126868	0.132207
FBgn0264426	0	0.00242075
FBgn0037370	0.0116109	0.0439216
FBgn0037835	0.011689	0
FBgn0027493	0.323591	0.218565
FBgn0261053	0.00120606	0.001261
FBgn0037801	0.0239596	0.01041
FBgn0051451	2.37447	3.17772
FBgn0038256	0.00700103	0.0183094
FBgn0038549	0.325668	0.301524
FBgn0004087	0.0296844	0.00327283
FBgn0037472	0.356403	0.214434
FBgn0260962	0.181719	0.155073
FBgn0037684	0	0.002915
FBgn0038722	0.14461	0.140535
FBgn0261356	0.00672617	0
FBgn0051475	0.0217687	0.10223
FBgn0039738	0.646438	0.617488
FBgn0039381	0.553076	0.574226
FBgn0037250	0.199689	0.173804
FBgn0051155	0.152597	0.0837851
FBgn0027526	0.124918	0.117344
FBgn0039271	0.153551	0.0904019
FBgn0037607	0.190837	0.0582552
FBgn0037550	0.131676	0.0862074
FBgn0038693	1.35461	1.46061
FBgn0038877	0.18457	0.26046
FBgn0039766	0.110821	0.0928135
FBgn0038106	0.151317	0.0679088
FBgn0003275	0.740682	0.556909
FBgn0038045	0	0
FBgn0037408	0.00495054	0.0119604
FBgn0038407	0	0.000989667
FBgn0039644	0.127158	0.133006
FBgn0037819	0.0287348	0.0349704
FBgn0037235	0.102576	0.0585206
FBgn0038923	0.325907	0.243821
FBgn0037843	0.19634	0.186251
FBgn0053208	0.723007	0.825986
FBgn0087012	1.90394	1.70937
FBgn0051547	0	0.00827312
FBgn0040575	0.274358	0.209324
FBgn0039154	0.00297927	0.00574178
FBgn0038805	0.164981	0.132753
FBgn0051301	0.158017	0.150652
FBgn0260722	0.299719	0.411261
FBgn0262538	0	0.0012144
FBgn0038198	0.0137312	0
FBgn0039296	0.223194	0.0950527
FBgn0039344	0.00781476	0.0143535
FBgn0038435	0	0.00695783
FBgn0037683	0.00447751	0.00270055
FBgn0037371	0.0626188	0.0391985
FBgn0037345	0.0866833	0.0378192
FBgn0037614	0.432027	0.37079
FBgn0037525	2.48512	2.31594
FBgn0038046	0.269723	0.19941
FBgn0038536	0.0898486	0.0597361
FBgn0037330	0.221336	0.133191
FBgn0259685	0.087653	0.0746798
FBgn0038946	0	0
FBgn0037533	0.568498	0.329773
FBgn0037712	0.0355227	0.0385031
FBti0019423	0	0.00241844
FBgn0038953	0.0491916	0.036121
FBgn0051390	0.29189	0.24044
FBgn0038627	0.0692911	0.031575
FBgn0027583	0.25046	0.151873
FBgn0039632	0.148632	0.136211
FBgn0037442	0.914068	0.937204
FBgn0004103	1.09106	0.991794
FBgn0039702	0.0887296	0.0497376
FBgn0026059	0.771512	0.869908
FBgn0039683	0.0125272	0.0210307
FBgn0046756	0	0.0034629
FBgn0039125	0.0551286	0.0156918
FBgn0038467	0.0610477	0.00993099
FBgn0010926	0.20198	0.236561
FBgn0038387	0.314977	0.194633
FBgn0037244	0.276125	0.223564
FBgn0037979	0.243829	0.245814
FBgn0038225	0	0.00243129
FBgn0015591	0.00578612	0
FBgn0037613	0.0398954	0.0566741
FBgn0051262	0	0.00357475
FBgn0040528	0.0276481	0.0163702
FBgn0051183	0.0329881	0.0196837
FBgn0014029	0.312058	0.275638
FBgn0013949	0.210829	0.0800798
FBgn0037504	0.145548	0.160482
FBgn0037941	0.0259216	0.119767
FBgn0267758	0	0
FBgn0267562	0	0.000834718
FBgn0023179	1.85452	1.70257
FBgn0051104	0.000762761	0.00164032
FBgn0046258	0	0.00294373
FBgn0038095	0.101786	0.0168518
FBgn0038723	0.25106	0.180431
FBgn0022359	0.017726	0.00145568
RR48350-transposable-element	0.0330308	0.0261438
FBgn0051251	0.0863053	0.0832186
FBgn0039113	0.172419	0.120746
FBgn0038277	0.0110953	0.022625
FBgn0262473	0.844066	0.877951
FBgn0259222	1.14267	1.06179
FBgn0016120	1.48473	1.20438
FBgn0037853	0.00867125	0
FBgn0262974	0.00302204	0
FBgn0038606	0.426852	0.498993
FBgn0039869	0.130092	0.106065
FBgn0026565	0	0
FBgn0037723	0.0878915	0.0997119
FBgn0264741	0.00536394	0.00897973
FBgn0266698	0	0.00465338
FBgn0265041	0.0757684	0.0471578
FBgn0038426	0.849675	0.621313
FBgn0037719	0.111323	0.1336
FBgn0038002	0	0
FBgn0027508	0.247984	0.286474
FBgn0003205	1.0131	0.89745
FBgn0002772	0.0131217	0.00385084
FBgn0027497	0.317425	0.318129
FBgn0039454	0	0.0028394
FBgn0038471	0.120928	0.0985155
FBti0019430	0.0605533	0.0447139
FBgn0051144	0.00232488	0
FBgn0024833	0.374558	0.355874
FBgn0014879	0.278142	0.239363
FBgn0039420	0.742308	0.710527
FBgn0039210	0.3878	0.353718
FBgn0039055	0.205989	0.266034
FBgn0024330	0.389127	0.421121
FBgn0038590	0.0546946	0.0439667
FBgn0278604	0.0452187	0.127088
FBgn0024944	0.946184	0.899014
FBgn0261015	0.000675952	0.0192111
FBti0019437	0.00763101	0.0167209
FBgn0039189	0.0309331	0.0137067
FBgn0054041	0	0
FBgn0266735	0.0041193	0.000928732
FBgn0002868	0.398619	0.776543
FBgn0065098	0.793121	0.392362
FBgn0051352	0.623532	0.675124
[truncated: 15,031 more rows]

## Sheet: Astrocytes
geneID	control_normalizedReadsCounts	tau P251L KI_normalizedReadsCounts
[truncated: 16,073 more rows]

[truncated: 21 more sheets: T2_T3, Tm3a, G_KC, Tmy8, MBON, C2_C3, Mi1, AB_kc, Dm8-TM5c, Mi4, Tm9, T1, Mi15, AB prime KC, LC12_LC17, Lawf1_2, Perineurial glia, Dm9, L1-L5, Pox neurons …]
