# Supplementary material for: Transcriptional programs mediating neuronal toxicity and altered glial–neuronal signaling in a Drosophila knock-in tauopathy model
Source: Genome Res. 2024 Apr;34(4):590–605. doi: 10.1101/gr.278576.123 (PMC11146598; doi:10.1101/gr.278576.123)
Supplement: Supplement 6 [file Supplemental_Table_S5.xlsx]

## Sheet: A. DEGs in Glial cells clusters
Supplemental_Table_S5: Up and down-regulated DEGs and Gene Ontology in the glial cell clusters and pseudotime DEGs in the astrocyte’s clusters.
(A) Up and down-regulated genes and Gene Ontology on these DEGs in the perneurial and astrocytes clusters of the tau P251L KI brain compared to the control.
(B) Pseudotime DEGs and Gene Ontology on these DEGs in the Astrocytes clusters. FDR adjusted p-value < 0.05.
Up-regulated in Perineurial Glia			Down-regulated in Perineurial glia
Gene Symbol	Avg_Log2FC		Gene Symbol	Avg_Log2FC
IA-2	3.03638		RR48361-transposable-element	-3.98186		1) Perineurial glia Gene Ontology
RR48373-transposable-element	2.94802		MFS3	-1.88432		a) Up-regulated Biological Process																			b) Downregulated Biological Process			b) Down-regulated Biological Process
pros	2.80593		Yp2	-1.7718		Term	P-value	Z-score	Combined Score	Genes															Term	Overlap		Term	P-value	Z-score	Combined Score	Genes
lncRNA:noe	2.6698		CG8321	-1.73343		amino_acid_transport_(GO:0006865)	7.1738e-05	-560.8	5351.43	para;hig;Rdl															DNA_replication_initiation_(GO:0006270)	`1/27		germarium-derived_female_germ-line_cyst_formation_(GO:0030727)	0.000998632	-642.091	4436.29	Yp2;Yp1
lncRNA:CR31451	2.51108		CG2233	-1.70509		associative_learning_(GO:0008306)	0.00180421	-829.344	5239.49	Appl;Rdl															mRNA_export_from_nucleus_(GO:0006406)	`1/43		mRNA_export_from_nucleus_(GO:0006406)	0.0317801	-770.816	2658.48	eIF4A
FBti0020120	2.25455		Yp1	-1.6669		calcium_ion_transport_(GO:0006816)	2.28623e-05	-402.344	4299.46	norpA;Rdl;Frq1															germ-line_stem-cell_niche_homeostasis_(GO:0060250)	`1/26		DNA_replication_initiation_(GO:0006270)	0.0200667	-671.046	2622.91	eIF4A
Appl	2.15863		Cys	-1.27653		R7_cell_differentiation_(GO:0045466)	0.00118435	-593.973	4002.52	pros;Appl															TORC1_signaling_(GO:0038202)	`1/34		male_gonad_development_(GO:0008584)	0.00397941	-469.663	2595.65	Yp2;Yp1
jim	2.12017		CG6357	-1.22608		glutamate_metabolic_process_(GO:0006536)	3.12391e-05	-382.617	3969.21	Appl;hig;cpx															negative_regulation_of_BMP_signaling_pathway_(GO:0030514)	`1/25		lysosomal_transport_(GO:0007041)	0.0317801	-536.978	1851.99	Rack1
CG42613	1.91331		MtnA	-0.827146
trv	1.85228		Rack1	-0.759181
Frq1	1.74112		RpS4	-0.756148		2) Astrocytes Gene Ontology
Ggamma30A	1.5967		eIF4A	-0.74436		a) Up-regulated Biological Process																			b) Downregulated Biological Process			b) Down-regulated Biological Process
fne	1.57651		RpS11	-0.743406		Term	P-value	Z-score	Combined Score	Genes															Term	Overlap		Term	P-value	Z-score	Combined Score	Genes
cpx	1.55829		RpL7	-0.70445		associative_learning_(GO:0008306)	3.01875e-07	-855.234	12839.8	Pka-C1;brp;Appl;dnc;Sap47																		L-cysteine_metabolic_process_(GO:0046439)	0.000684027	-699.551	5097.99	SPARC;Cp1;eEF1alpha1
hig	1.54757		CG7800	-0.551791		R8_cell_development_(GO:0045463)	3.40018e-05	-605.735	6232.47	nrv3;pros;Appl;jeb																		axon_extension_(GO:0048675)	0.000833733	-456.07	3233.35	Frl;Mmp1;CLIP-190;Dscam1
Rdl	1.4787					Ras_protein_signal_transduction_(GO:0007265)	0.000163177	-590.878	5152.86	Pka-C1;Appl;jeb;scrib;Epac																		acyl-CoA_biosynthetic_process_(GO:0071616)	0.00206876	-498.8	3082.99	whd;Acsl;CG18815
RR50423-transposable-element	1.47623					BMP_signaling_pathway_(GO:0030509)	0.00103528	-657.045	4515.92	nmo;dally;mei-P26;scrib																		cell-matrix_adhesion_(GO:0007160)	0.0158464	-740.562	3069.49	CAP;Mmp1
lncRNA:CR40469	1.42584		Down-regulated in Astrocytes			cAMP_metabolic_process_(GO:0046058)	2.50152e-05	-328.349	3479.19	Pka-C1;pros;dnc;Epac																		negative_regulation_of_endopeptidase_activity_(GO:0010951)	0.0158464	-616.829	2556.64	Mmp1;scny
Galphao	1.4157		Gene Symbol	Avg_Log2FC
eEF1alpha2	1.38326		RR48361-transposable-element	-2.53601
Syt7	1.3584		Yp3	-2.35989
FBti0063007	1.34364		Yp2	-1.94979
chn	1.34196		CG2233	-1.79373
CG15236	1.31841		Yp1	-1.74937
ct	1.19768		CG32368	-1.67396
unc-104	1.15472		Gbp2	-1.57313
mt:ATPase8	1.05401		CG8321	-1.48484
norpA	0.972368		Idgf6	-1.36197
para	0.941615		NimB2	-1.35361
Sh	0.586063		CG4716	-1.25906
			fon	-1.25584
			CG11407	-1.14522
			Idgf4	-1.13513
Up-regulated in Astrocytes			CG9689	-1.07075
Gene Symbol	Avg_Log2FC		CG2852	-1.06232
RR48373-transposable-element	2.36728		Frl	-1.05502
FBti0020120	2.1178		sgl	-1.03218
lncRNA:CR40469	2.03397		Spn43Ab	-1.01157
FBti0063007	1.58745		Ugt35B1	-0.950547
FBti0019150	1.57955		CG31344	-0.936503
FBti0019000	1.49073		CG9686	-0.904665
mt:ATPase8	1.17616		GstD1	-0.899082
RR50423-transposable-element	1.09239		CG10527	-0.86136
lncRNA:CR31451	1.02496		uex	-0.856203
VGlut	0.799054		CG9691	-0.839684
RR48383-transposable-element	0.794446		MtnA	-0.8246
FBti0019148	0.664326		List	-0.819748
Arc1	0.653975		SPARC	-0.778531
jim	0.646556		eEF1alpha1	-0.763967
fmt	0.607038		Irk2	-0.753594
pros	0.589366		Mmp1	-0.729539
Epac	0.54573		Tsf1	-0.722337
Appl	0.531369		h	-0.707132
Ank2	0.510184		CG7084	-0.700884
alrm	0.508574		scny	-0.689793
Amph	0.491104		lncRNA:CR42491	-0.68942
lncRNA:Hsromega	0.485367		RpS4	-0.679908
mt:ATPase6	0.468201		AnxB9	-0.67645
mt:ND1	0.461371		vir-1	-0.665738
side-VI	0.44175		Calr	-0.645753
mt:CoI	0.435567		CG31706	-0.644755
chrb	0.426992		RpLP2	-0.628925
IA-2	0.421591		CG10960	-0.619756
nmo	0.413908		CG30197	-0.61201
brp	0.412274		RpL13A	-0.610452
sif	0.404509		whd	-0.593573
mt:Cyt-b	0.401759		Tsp42Ea	-0.589934
scrt	0.39978		GstD9	-0.586251
nrv3	0.39874		CG15201	-0.580563
unc-13	0.39393		RpS11	-0.573311
jeb	0.384505		Cyp1	-0.570977
VAChT	0.383658		Invadolysin	-0.570126
scrib	0.382723		CG18135	-0.568485
cpx	0.379365		CG12926	-0.563963
Rbp6	0.378632		CG6218	-0.553206
Hrb27C	0.376175		Rack1	-0.542308
mt:CoII	0.375274		Tpi	-0.54045
CG4467	0.374524		RpL10	-0.539467
sm	0.368336		RpL7	-0.531051
Gat	0.367349		RpS8	-0.528629
Galphao	0.366743		Tsp42Ee	-0.52768
PAN3	0.366036		Sarm	-0.527574
Lk6	0.365858		repo	-0.526408
CG32017	0.362579		CtsB1	-0.525586
sty	0.3576		CG5895	-0.522357
Obp44a	0.356202		CG3625	-0.515496
ctp	0.350791		RpS18	-0.510794
Gbeta13F	0.337074		CAP	-0.50842
mei-P26	0.333136		hoe1	-0.506599
Unr	0.329722		CG31676	-0.501337
Cam	0.32313		Trx-2	-0.49417
mub	0.314607		CG6287	-0.489332
CG31221	0.301138		Npc2a	-0.486783
kmr	0.287554		Gel	-0.486403
Ggamma30A	0.28141		RpL22	-0.485663
mt:ND5	0.280558		RpL27A	-0.48559
Pka-C1	0.27765		CLIP-190	-0.480977
unc-104	0.276123		RpS21	-0.480428
dnc	0.275219		lncRNA:roX1	-0.479399
Sap47	0.263078		RpL17	-0.474176
Msp300	0.260596		ana	-0.472642
dally	0.255438		CG1648	-0.470531
para	0.251301		axo	-0.469972
			eEF1beta	-0.468777
			RpL23	-0.467264
			RpS16	-0.4662
			Cyp9f2	-0.463815
			His4r	-0.463156
			CD98hc	-0.462986
			Idh	-0.461704
			CG5946	-0.456768
			eEF5	-0.454867
			RpL19	-0.45462
			Meltrin	-0.453072
			eIF3m	-0.452676
			sta	-0.449766
			RpLP0	-0.447903
			RpL6	-0.445355
			RpL18	-0.441807
			CG42613	-0.440246
			mgl	-0.434185
			RpL37a	-0.429655
			RpL35A	-0.428295
			RpL12	-0.427754
			CG9657	-0.427352
			CG18815	-0.426846
			RpL18A	-0.425383
			betaTub56D	-0.423275
			RpS10b	-0.422515
			tsr	-0.422321
			RpL9	-0.420685
			RpL26	-0.41572
			alphaTub84B	-0.411208
			CG11151	-0.408096
			Pdk	-0.403557
			Rbp1	-0.402671
			RpS2	-0.398222
			RpS3A	-0.396226
			CDase	-0.395388
			eIF4A	-0.393217
			Acsl	-0.391618
			COX7A	-0.391356
			CG17739	-0.390467
			eIF3h	-0.389893
			Cp1	-0.383815
			Sod2	-0.38265
			LpR2	-0.382512
			CG31705	-0.381582
			EloC	-0.37847
			RpL13	-0.374785
			RpL14	-0.374753
			Elal	-0.374416
			RpL10Ab	-0.373055
			RpL8	-0.372363
			RpL21	-0.36765
			Mtl	-0.367437
			sun	-0.367281
			ATP6AP2	-0.367124
			mt:ND3	-0.365842
			lncRNA:CR45054	-0.364189
			RpL27	-0.363563
			Hsp83	-0.363058
			Csas	-0.361125
			CG17508	-0.357174
			ATPsyngamma	-0.356547
			RpS29	-0.356405
			RpL28	-0.356133
			RpS7	-0.35364
			bnb	-0.352023
			Chd64	-0.346546
			RpL34a	-0.344073
			Tapdelta	-0.341695
			Rh50	-0.341136
			Neb-cGP	-0.336308
			ND-30	-0.336027
			Dscam1	-0.330477
			CG42673	-0.329828
			ine	-0.329259
			RpS9	-0.318206
			SdhB	-0.317938
			RpS15	-0.316874
			Nacalpha	-0.315463
			RpS27A	-0.304607
			ATPsynO	-0.30368
			RpL23A	-0.297256
			RpS27	-0.297222
			RpL3	-0.297018
			RpS15Aa	-0.294948
			RpL38	-0.289073
			RpL7A	-0.287937
			RpS12	-0.280121
			CG15209	-0.273937
			RpS20	-0.271509
			RpLP1	-0.263838
			RpS3	-0.258802

## Sheet: B. Pseudotime DEGs 
Astrocytes top 100 pseudotime DEGs					Ontologies on cluster 1 to 2 transition pseudutime genes_GO Biological Process 2018
RR48373-transposable-element
mt:ND5		Cluster 3 to 0 transition			Term	P-value	Z-score	Combined Score	Genes
mt:CoI					negative regulation of cell motility (GO:2000146)	0.00389415	-4.51116	25.0292	CG44774
CG14762					cellular response to topologically incorrect protein (GO:0035967)	4.65626e-05	-2.50292	24.9659	Hsp68;Hsp70Ab
Msp300					response to unfolded protein (GO:0006986)	4.65626e-05	-2.50127	24.9494	Hsp68;Hsp70Ab
lncRNA:roX2					'de novo' posttranslational protein folding (GO:0051084)	8.94361e-05	-2.63398	24.5539	Hsp68;Hsp70Ab
S		Cluster 2 to 3 transition			non-canonical Wnt signaling pathway (GO:0035567)	0.00518909	-4.52269	23.7948	fz2
Dscam1					regulation of chromosome organization (GO:0033044)	0.00389415	-4.16393	23.1026	mamo
ct					cellular response to unfolded protein (GO:0034620)	5.27517e-05	-2.32148	22.8664	Hsp68;Hsp70Ab
CG9932					chaperone mediated protein folding requiring cofactor (GO:0051085)	8.94361e-05	-2.33596	21.7758	Hsp68;Hsp70Ab
scyl					establishment of body hair or bristle planar orientation (GO:0048104)	0.00389415	-3.67351	20.3817	app
Fur1					glutamate receptor clustering (GO:0097688)	0.00389415	-3.6523	20.264	Fur1
Hsp70Ab		Cluster 1 to 2 tansition			negative regulation of cell migration (GO:0030336)	0.00583598	-3.81653	19.6312	CG44774
CR32865					presynaptic membrane organization (GO:0097090)	0.00777431	-3.93522	19.1131	Fur1
Hsp68					synaptic target inhibition (GO:0016201)	0.00777431	-3.60321	17.5006	fz2
mamo					development of primary female sexual characteristics (GO:0046545)	0.00841964	-3.58161	17.11	fz2
app					heat shock-mediated polytene chromosome puffing (GO:0035080)	0.00648247	-3.29362	16.5954	Hsp70Ab
CG44774					female gonad development (GO:0008585)	0.00906459	-3.49115	16.4202	fz2
Pdi					polytene chromosome puffing (GO:0035079)	0.00712858	-3.04416	15.0493	Hsp70Ab
Rbp6					retinal ganglion cell axon guidance (GO:0031290)	0.00841964	-3.09974	14.8081	fz2
Ace					postsynaptic membrane organization (GO:0001941)	0.00906459	-3.05411	14.3647	Fur1
fz2
wry		Cluster 1			Ontologies on cluster 1 pseduotime genes_GO Biological Process 2018
SoxN
CG17716					Term	P-value	Z-score	Combined Score	Genes
G protein gamma subunit 30A		CG3694	Change gene symbol to Annotation symbol (CGs) for Gene Ontology as Flyenrichr doesn't accept the gene name.		negative regulation of transport (GO:0051051)	0.000222963	-5.02396	42.2439	Pde6;Slob
Nckx30C					homophilic cell adhesion via plasma membrane adhesion molecules (GO:0007156)	7.25776e-08	-2.4639	40.503	rst;Con;CG34353;ed;caps
Frq1					cell-cell adhesion via plasma-membrane adhesion molecules (GO:0098742)	5.4176e-09	-1.81146	34.4786	beat-VI;rst;Con;beat-Ib;CG34353;ed;caps
CG9650					regulation of ATPase activity (GO:0043462)	0.0231759	-6.2492	23.526	Slob
Gfrl					phospholipase C-activating G-protein coupled receptor signaling pathway (GO:0007200)	0.000662147	-3.11753	22.8204	mtt;mAChR-A
VAChT					motor neuron axon guidance (GO:0008045)	4.70504e-07	-1.56131	22.7475	trn;beat-VI;side;Mp;beat-Ib;caps
ChAT					larval salivary gland morphogenesis (GO:0007436)	0.00132553	-3.3076	21.916	trn;caps
stai					tube fusion (GO:0035146)	8.33071e-05	-2.30398	21.6413	trn;ed;caps
bru3					branch fusion, open tracheal system (GO:0035147)	8.33071e-05	-2.26044	21.2323	trn;ed;caps
CG2269					temperature compensation of the circadian clock (GO:0010378)	0.0231759	-4.7742	17.9732	eys
hig					cyclic nucleotide metabolic process (GO:0009187)	0.00132553	-2.42795	16.0875	rut;Pde6
Pde6					negative regulation of nervous system development (GO:0051961)	0.0307827	-4.58572	15.962	ed
CG32017					microtubule depolymerization (GO:0007019)	0.0269867	-4.35402	15.7285	stai
CG17816					negative regulation of cell development (GO:0010721)	0.0269867	-4.34767	15.7056	ed
CG42750					adenylate cyclase-inhibiting G-protein coupled receptor signaling pathway (GO:0007193)	0.00196604	-2.51276	15.6589	rut;mAChR-A
Ca-α1T		CG15899	Change gene symbol to Annotation symbol (CGs) for Gene Ontology as Flyenrichr doesn't accept the gene name.		negative regulation of hormone secretion (GO:0046888)	0.0231759	-4.15741	15.6512	CG9650
Con					anterograde trans-synaptic signaling (GO:0098916)	2.54649e-05	-1.46541	15.5014	rut;NtR;Frq1;VAChT;mAChR-A
Pvf3					synaptic target attraction (GO:0016200)	0.0269867	-3.95617	14.2913	Con
CG32700					chemical synaptic transmission (GO:0007268)	2.33963e-06	-1.09851	14.2427	rut;ChAT;Slob;NtR;Frq1;VAChT;mAChR-A
CG34384
Mp
CG30116
CG11319
Cngl
eys
side
GluRIB
rut
rsh
side-II
caps
Slob
CG14186
ed
l(1)G0469
CG10804
Camta
CG34353
mAChR-A
beat-Ib
beat-VI
mtt
FBti0063565
Obp99c
side-V
CG32204
lncRNA:CR45758
trn
dpr3
CG46339
Jabba
Cyp4g1
dpr2
CG13458
FBti0102105
FBti0062856
rst
AttC
CG15293
CG10680
Tret1-1
Tsp42Ed
Idgf1
frma
Cyp6g1
CG15449
CG5080
Ser7
CG34220
CG8086
NtR
NimB5
lncRNA:CR43264
FMRFa
Cyp4e3
