# Supplementary material for: Transcriptional programs mediating neuronal toxicity and altered glial–neuronal signaling in a Drosophila knock-in tauopathy model
Source: Genome Res. 2024 Apr;34(4):590–605. doi: 10.1101/gr.278576.123 (PMC11146598; doi:10.1101/gr.278576.123)
Supplement: Supplement 8 [file Supplemental_Table_S7.xlsx]

## Sheet: A. Control Kenyon Cells
Supplemental_Table_S7: Details of Regulon identified, via gene regulatory network analysis, in the control and tau P251L KI kenyon cells.
(A) Details of the genes in each regulon of the identified top 10 regulons in the control Kenyon cells.
(B) Details of the genes in each regulon of the identified top 10 regulons in the tau P251L KI Kenyon cells.
Top 10 Regulons enriched in the control Kenyon cells
ZIPIC regulon network	PhoI regulon network	GATAd regulon network	sd regulon network	sima regulon network	Pur-alpha regulon network	Blimp regulon network	E-(bx) regulon network	CG16779 regulon network	lola regulon network
CG8043	beta4GalT7	l(3)neo38	E2f1	Nmdar1	unk	RhoGAP93B	l(3)neo38	CG42788	CG34354
CG11722	mAChR-B	gish	rn	Ktl	l(3)neo38	pum	pum	CG11768	l(3)neo38
Ccm3	dpr5	beat-IIa	ash2	sosie	RhoGAP93B	Cow	Fmr1	l(3)neo38	RhoGAP93B
14-3-3epsilon	CG1907	CG14669	gish	CG14556	klg	Fmr1	E2f1	pum	pum
beat-IIa	CG1129	nAChRalpha1	osa	tinc	mAChR-B	ash2	gish	rn	eIF4G2
CG1635	Pcmt	Hus1-like	plum	Hsc70-4	CG14669	CG31522	dan	trv	jigr1
mtSSB	Octbeta2R	Map205	sqz	Octbeta3R	CG34353	osa	osa	unc80	mAChR-B
mRpL11	ps	Stat92E	nAChRalpha1	CG17230	CG42668	RhoGAP100F	sqz	Fas1	CG13631
stops	CD98hc	pyd	CG4467	CG12402	CG31191	Parp	nAChRalpha1	CG4467	osa
zfh1	Cks85A	Fur1	cv-c	crb	CG16779	5-HT2A	RhoGAP100F	CG31191	beat-IIa
InR	Oamb	Dop1R2	CG31140	mtd	tinc	CG6154	Mvl	CG16779	plx
Mical	mtd	Rab11	VAChT	msi	FBXO11	Syp	CG31140	cv-c	trv
CG11882	CG12071	wts	gpp	CG31324	Octbeta2R	Rim	ps	ps	CG14669
Sap-r	CG11964	KrT95D	CG11873	tnc	VAChT	CtBP	CG11873	crb	plum
2mit	CG7920	CG14853	CG6231	Jupiter	glec	ChAT	trx	mtd	Fas1
GluClalpha	Bili	Cip4	Rim	GluClalpha	CG31475	CASK	Syp	Syp	nAChRalpha1
CG10669	Lnk	CG14563	Myo81F	ChAT	Hmx	dpr9	CtBP	CG42342	RhoGAP100F
ArgRS-m	bel	syd	ChAT	CG34155	CG11873	CG45263	Jupiter	Ppcs	CG4467
Tsc1	cno	Blimp-1	eff	Nlg4	Fur1	l(3)L1231	rdx	Jupiter	CG34384
CG2246	CG31122	Dbp80	CG45263	Rbp	CG31324	CG14712	eff	jvl	Atpalpha
CG6574	Teh1	Con	PKD	Dop1R2	CtBP	Glut4EF	REPTOR	Gprk2	cv-c
nkd	aux	CG42540	mrt	pros	side	Scp2	Glut4EF	CASK	tinc
CG17839	Gyc89Db	tow	fru	sima	jvl	fru	Xrp1	pros	CG31140
CG32176	CG7582	rdgC	wts	Tusp	Nlg4	tws	sba	Glut4EF	VAChT
Pex23	CG13248	chrb	larp	sll	Gycbeta100B	lap	hth	Gdh	glec
Rbp6	foi	skl	Eip93F	fru	CG1090	hth	KrT95D	beat-VII	Ptp99A
CG6282	phol	msn	heph	CG6345	5-HT7	beat-VI	Dad	CG11000	hdc
Ptp61F	CG7011	CG6765	CG45050	beat-VII	Nlg3	larp	Teh1	Eip93F	ps
Surf1	CG6024	CkIIalpha	skd	KrT95D	Cad87A	Rm62	Rm62	CG42613	CG42322
CG14966	ebd2	Pdk1	tna	CG2747	neur	CG42613	Hipk	CG45050	gpp
Lmpt	Sod1	nAChRbeta1	Diap1	VhaPPA1-1	CycG	Gbs-70E	skd	Su(Tpl)	mtd
TfIIEalpha	Lmpt	Gbs-76A	CG6836	GCC88	CG31145	Hipk	tna	Dscam2	sals
Pc	CG14185	CG13917	CG14073	CG31249	Eip93F	skd	CG18265	Rdl	msi
RecQ5	PMP34	ftz-f1	ko	Sur-8	CG42613	CG18265	DopEcR	fax	CG31324
CG12024	Rh7	CG33056	Mob2	mael	Hipk	Blimp-1	tow	CG42540	sr
Tudor-SN	mge	akirin	Dbp80	CG32425	unc-13-4A	tral	CG42671	Pdp1	side
jim	CG43078	DIP-delta	Ac78C	ko	JIL-1	CG14985	CG32066	Pka-C3	GluClalpha
CG2790	Tet	hfp	Mi-2	vsg	skd	Sec3	RpL8	S6k	scrib
Pdk	Ack	CG32432	CG12605	Ptp61F	GluRIA	lqf	Abl	CG13928	rdx
mRpL52	Fie	jim	CG5910	VhaM9.7-c	CG17364	ppk27	msn	Tet	Ace
CG11123	Psa	fz	DopEcR	ebd2	vsg	CG42324	Tet	CkIIalpha	btsz
pita	Est-6	AGO1	Pdp1	CG33217	CG32137	IRSp53	nmo	ftz-f1	CG34155
Asap	Fhos	Khc	tow	nudC	PVRAP	chrb	Rdh	Snap25	CASK
CG11883	CG12084	sm	CG6628	rdgC	CG12605	Sox21b	enc	CG7646	NK7.1
Sema2a	mRpL12	CG11883	olf413	cmpy	CG14997	CG12004	Eip78C	blot	Rbp
CG34370	Ptpmeg	hppy	Mkp3	Mkp3	Pdp1	stv	Atg1	qm	dpr9
CG13018	CG16758	tou	MYPT-75D	Eip63E	ATPsynB	RhoGDI	CG32486	bol	CG42795
Syn2	cyc	kcc	Sox21b	Dysb	tow	orb2	CG32432	GC	l(3)L1231
tou	CG32202	Mid1	CG6175	Eip74EF	Baldspot	gogo	jim	RhoGAP71E	Csk
CG33155	Sgf11	par-1	Pdk1	Rbfox1	CG13928	CG13917	dpr10	CG17698	Glut4EF
ZnT49B	Dscam4	Dyb	nmo	CG32204	rdgC	comm	fz	jim	hth
CG14767	Gale	Patronin	Rdh	form3	Tet	nmo	EcR	Sytbeta	KrT95D
HnRNP-K	CG40045	jeb	Crtc	Gbs-76A	Fife	CG32206	CG42260	sif	sqd
CG3107	nerfin-1	clu	DCP2	nmo	CG17233	CG42747	bin3	CG32264	cpo
IntS8	mthl2	CG8929	Atg1	CG42747	CG44838	Rdh	sm	EcR	larp
Dp	Debcl	aPKC	app	DIP-delta	ru	CG32085	Hr3	Dll	dco
CG7639	Idgf6	d4	Hsc70Cb	CG7646	sff	Crtc	CG13954	AGO1	CG43102
CG17059	CG17683	Pdcd4	Rap1	Ets65A	CG32206	emc	CG17684	sm	Eip93F
Inos	Snp	dtn	Rgl	bma	Crtc	CG6163	Galphao	CG1648	CG42613
SCCRO3	Rbpn-5	CG7990	Spn	bol	Snap25	Mp	tou	Hr3	twin
CG17724	Alk	Rab35	EcR	CG8745	scyl	fwe	CG6329	CG13954	Hipk
CG8229	Vps28	HDAC4	chn	Set1	Eip78C	CG32486	blw	p120ctn	rhea
CG15653	CG15097	Cnx14D	sm	Taf4	CG7646	CG8745	CG10543	unc-104	CG13937
mRpL33	CG30158	CkIIbeta	tun	Ero1L	Mp	CG32432	Lis-1	a	JIL-1
Tom40	CG17528	RhoGAP19D	cora	Hsc20	yps	CG42458	CG10082	CG11883	hid
CG14200	zip	rudhira	Rgk1	dpr10	app	Src64B	brp	Elk	Diap1
DAAM	par-1	CG43759	RpL18A	CG8298	bma	dysc	Drep2	Rgk2	Su(Tpl)
CG8974	CG4409	amn	hppy	l(2)k10201	bol	EcR	CG5065	Galphao	CG14563
Hmr	ptc	CG7326	Galphao	CG17684	nAChRalpha4	chn	sbb	mim	syd
Rab40	dpr13	Unc-76	tou	Rgk1	CG32432	CG1688	Smurf	CG30158	Blimp-1
su(w[a])	NtR	Hex-A	CG6329	CG10384	CG33158	LRR	Mad1	CG40498	GluRIB
Grip91	stj	CG2865	CG9005	Dgk	CG7692	sm	jeb	qvr	Ank2
Hk	MFS17	spri	CG10543	CG14478	Rap1	RNASEK	MESK2	Mid1	Rdl
Sh	CG42806	CG43736	Dhit	l(2)41Ab	Mrtf	ktub	Prosap	wech	ko
CG8034	Act42A	nej	Mid1	CG13185	Glut1	LRP1	CG13739	Egfr	dpr6
wapl	kune	RpL7A	Lis-1	Galphao	CG42458	betaTub56D	mspo	CG10082	fax
CG1440	Epac	fog	par-1	grh	Ten-m	Not1	lola	HmgD	tral
vap	cpa	Cp110	RyR	bs	Clc	Rgk2	aPKC	brp	Mob2
Dop2R	Appl	Proc-R	psq	pyr	Deaf1	Galphao	Drat	CheB42c	GlcAT-P
ctp	CG1532	mnb	CG30116	Magi	CG10731	mam	Mef2	CG42700	CG12605
CG7772	Tomosyn	HERC2	Drep2	kn	Sema2b	cg	rdgB	psq	scro
nonC	G9a	CG12535	CG30105	Fkbp14	TBPH	blw	dtn	CG30116	siz
CG3704	rst	CG42699	CG5065	CG41378	chn	CG16739	HDAC4	Gp210	CG42540
bif	CG3632	AP-1gamma	hrg	CG5065	fl(2)d	Ih	CanA-14F	px	tipE
CG15601	Gbeta5	pod1	MESK2	ttv	Hr3	Mid1	kdn	Hs3st-A	DopEcR
Dlic	CG6762	Rip11	Prosap	CG11191	cora	zip	Sxl	RpS11	tow
Ctr1A	stx	CG3862	CG42392	Trpm	Rho1	CG10082	lawc	MFS17	Toll-6
Trf2	CG3566	Ndae1	lola	Prosap	qkr54B	hbs	Nup153	Dg	CG33054
CG32982	Cdc42	Msp300	aPKC	dnr1	KCNQ	ths	stx	Mef2	Rab26
Bka	Nmdar2	bru2	d4	mtt	CG14478	psq	elav	CG3556	Sox21a
CG10166	per	GATAd	CG43902	CG8910	Not1	CG30116	rudhira	sdt	dally
C1GalTA	CG14439	CG43778	CG7990	Vmat	CG11406	Hs3st-A	mgl	hep	MYPT-75D
CG42784	Set2	crol	HDAC4	sdt	Rgk2	CG30105	shakB	dtn	fz2
ND-51	sgg	dpy	nocte	ari-1	Galphao	CG43366	sd	Syt12	CG10960
ND-13A	CG17598	kek3	NetB	CG5273	blw	Dscam1	Bx	mei-P26	Abl
Rab30	Gmap	Ca-beta	CG43658	RunxB	HmgZ	ttv	Hex-A	CanA-14F	Shal
Oatp30B	Hex-A	salm	elav	Sxl	Ih	Spred	Mnt	Vap33	msn
jp	CG9132	ed	rudhira	NetB	Pde8	sbb	nej	NetB	Shab
CG6729	CG10778	CenG1A	Nep1	Fbxl4	par-1	Smurf	para	Cyp1	Fife
aru	spri	Proc	CG34401	oc	fd59A	Dg	CG32767	elav	orb2
Herp	nej	CG4502	BCL7-like	CG43759	CG1358	Trpm	RpL7A	rudhira	Rbfox1
dati	alpha-Man-Ia	RapGAP1	Frq1	CG14440	CG30116	CG33143	kirre	Pdfr	Pdk1
	bif	CG11030	LPCAT	CG2875	Prosalpha5	mspo	Pde9	Nep1	CG44838
	Mct1	Cadps	gce	CG17600	NaCP60E	Rab3	mnb	Hk	nAChRbeta1
	IntS2		dlg1	mgl	Dscam1	aPKC	HERC2	CG34401	Gbs-76A
	rush		c11.1	kek5	sano	Mef2	CG33181	CG43759	ftz-f1
	CkIalpha		X11Lbeta	amn	sca	Fas2	Trf4-1	east	Pdi
	CG34028		Hsc70-3	CG3198	Trpm	Usp2	fs(1)h	SPR	comm
	CG32809		mahe	LPCAT	MESK2	CG43347	Nrg	mgl	nmo
	CG15445		zld	Ca-alpha1T	CG42392	rb	Rbp9	Frq1	Rdh
	Cyp4g1		CG12236	Klp10A	Gprk1	cac	chinmo	gce	shep
	UbcE2H		Hers	Hers	Hen1	hep	CG42784	CG17778	CG32085
	dsh		shakB	ZAP3	Rab3	Tomosyn	Dif	Ca-alpha1T	mub
	pod1		hiw	CG32647	lola	CG42450	CG43778	CG32647	Crtc
	Apoltp		sd	CG5004	aPKC	CG7990	beat-IIIb	Ten-a	alpha-Spec
	CG2772		Amun	CG14441	CG43901	Ubi-p5E	Syt1	dod	akirin
	mRpS7		RhoGAPp190	shakB	CG3556	ari-1	brat	sd	Atg1
	CG10492		Mnt	PpV	rdgB	CG3638	lilli	RhoGAPp190	Aplip1
	hoe2		rdgA	Mur2B	l(1)G0289	CanA-14F	Bsg	Atg8a	bma
	CG33298		RSG7	CG18508	cac	CG14442	tutl	Hex-A	bol
	CG4364		nej	CG10932	Tomosyn	Ubr3	tai	mmd	fwe
	tadr		RpL7A	Mnt	CG42450	CG12541	mts	rdgA	scny
	CG2201		Moe	rdgA	dtn	Evi5	kis	CG2865	Idh
	Tsp39D		CG32549	nej	CG42541	CkIIbeta	CG31999	Dsp1	CG32432
	CG10283		arg	Cp110	Ubi-p5E	stx	Cadps	nej	Hsc70Cb
	Reph		be	spoon	CG3638	elav	Pur-alpha	para	Dscam4
	l(2)05714		Tlk	mnb	mei-P26	RpS14b		disco-r	RhoGAP71E
	mib2		HERC2	CG14621	CanA-14F	Hk		CG32767	Glut1
	Piezo		CG33181	fs(1)h	CrebB	sesB		CG42797	jim
	drongo		eag	SK	Sxl	mgl		kirre	CG5151
	TBCC		Trf4-1	Imp	su(w[a])	Frq1		fog	Sytbeta
	Patsas		Nna1	CG1368	Hmt4-20	flw		Pde9	sif
	Zir		CG15765	RpS6	NetB	c11.1		csw	CG32264
	Cul3		SK	Cngl	CkIIbeta	X11Lbeta		CkIalpha	Src64B
	bur		Imp	dpr2	Tao	Hsc70-3		fs(1)h	fz
	Slmap		CG14207	CG43861	RhoGAP19D	mahe		SK	TAF1C-like
	CG7627		Trf2	CG11319	elav	CG32647		Tob	CG42260
	dia		ct	BuGZ	rudhira	CG13366		Ubqn	bin3
	betaggt-II		Cngl	sick	fend	CG1677		g	Dll
	pan		dpr8	CG42369	mgl	RhoGAPp190		br	AGO1
	unc-13		CG3862	CG44085	flw	hec		Nrg	chn
	apolpp		Ndae1	CG3625	CG7378	Bx		CHES-1-like	shot
			crp	CG42750	CG8034	Hex-A		Pde1c	sm
			kuz	CG4587	Crag	l(1)G0469		CLIP-190	RNASEK
			bru2	rdo	Amun	CG32683		CG11319	uex
			Df31	nAChRalpha6	Rrp45	CG2865		Lar	Sesn
			B4	H15	CG43689	CG43736		CG42784	dpr1
			Reph	DIP-zeta	Mnt	bif		dpr19	Sdc
			Sema1a	CG34393	rdgA	NFAT		RpL21	unc-104
			crol	erm	RpS15Aa	Moe		smt3	a
			ab	tkv	Neto	CG12112		CG4587	CG14478
			ed	Ca-beta	unc-119	csw		lid	Elk
			CenG1A	CG5968	nej	schlank		CG43778	Not1
			dac	t-cup	RpL7A	CG1737		IA-2	mam
			Bsg	dac	NFAT	CG14629		CG4297	Dek
			Lrch	Wdr62	CG43737	CG33181		Syt1	tou
			CG4502	RpL24	CG4407	CG12531		bsk	CG6329
			RapGAP1	sky	kirre	SK		brat	blw
			chic	CG44153	csw	UbcE2H		Nckx30C	CG9005
			mts	VGlut	CkIalpha	CG32547		jhamt	dap
			Rab5	tai	futsch	Tob		spen	ckn
			osp	Rab5	norpA	Trf2		nolo	Ih
			kis	osp	CG12155	w		nAChRalpha5	Pde8
			CG11030	Thd1	eag	ct		capu	Dhit
			Syt7	unc-13	Sec16	Plc21C		tutl	Mid1
				PlexA	CG12531	Ndae1		smog	CG9896
				Ekar	SK	Msp300		Snoo	CG10082
				Crk	CG3655	Caper		CG11030	par-1
				CG7365	g	RFeSP		dati	RyR
					CG15894	sick		NfI	Dyb
					w	raw		pan	rl
					CG43867	Gs1		unc-13	brp
					Slob	CG2201		RpS3A	CG33144
					GABA-B-R1	CG10283		CaMKII	CG15117
					cact	Sam-S			Liprin-gamma
					CG5861	cdc14			kn
					RpL5	CG43778			ap
					beat-IIIc	dpy			mAChR-A
					CG31688	bgm			NaCP60E
					Rab14	Ca-beta			ttv
					BicD	CG17211			Spred
					CG31760	FASN1			CG30389
					CG17493	Myo28B1			sbb
					Sema1a	ab			Smurf
					CG4587	Cf2			MESK2
					CG15431	lilli			Prosap
					CadN2	Ac3			dnr1
					beat-IIIb	CG44153			Gprk1
					Syt1	tai			lola
					brat	smog			CG8929
					Ca-beta	swm			Drat
					Akap200	CG11030			cv-2
					Su(dx)	unc-13			Pdcd4
					Ncoa6	Cadps			Appl
					Nckx30C	l(2)03659			CG15312
					Cf2				Fas2
					Rtnl1				Usp2
					Cka				CG43347
					CG14535				sdt
					Rsf1				hep
					smog				dtn
					Snoo				CG3638
					numb				HDAC4
					dpr7				CG45002
					PMCA				nocte
					pho				mei-P26
					toy				CanA-14F
					Gyf				Ubr3
					CaMKI				RhoGAP19D
					Kif3C				stx
					Pur-alpha				elav
					gw				CG4078
									Chc
									rudhira
									Nep1
									Grip91
									Hk
									fend
									CG43759
									nAChRalpha3
									sesB
									Sh
									gce
									CG12672
									Rok
									X11Lbeta
									Ca-alpha1T
									mahe
									Hers
									Ten-a
									shakB
									Ubr1
									inaE
									hiw
									Adar
									sd
									Mnt
									slpr
									l(1)G0469
									CG2865
									RSG7
									CG43736
									nej
									alpha-Man-Ia
									para
									Yp3
									CG32767
									D2hgdh
									Moe
									CG3726
									Pde9
									csw
									Proc-R
									ben
									futsch
									CG9650
									spoon
									Tlk
									HERC2
									CG33181
									eag
									fs(1)h
									CG32795
									Rab3-GEF
									CG15765
									SK
									CG32547
									Tob
									Nrg
									beta-Spec
									CG42340
									w
									AP-1gamma
									CG43867
									dpr8
									Plc21C
									CG32982
									Ndae1
									Apoltp
									chinmo
									CG33129
									Nlg2
									Lar
									CadN
									raw
									CG42784
									bru2
									CG4341
									Df31
									CG31690
									CG9932
									Reph
									CG17493
									cdc14
									CG3225
									Syt1
									kek3
									brat
									CG31635
									Hnf4
									Ca-beta
									Nckx30C
									Cf2
									dac
									sky
									Bsg
									Lrch
									CG9328
									tutl
									tai
									Rab5
									Snoo
									kis
									unc-13
									PlexA
									CG31999
									Cadps
									Mitf
									Pur-alpha

## Sheet: B. tau P251L KI Kenyon cells
Top 10 Regulons enriched in tau P251L KI Kenyon cells
Hsf regulon network	fru regulon netowork	Zfh2 regulon network	Usp regulon network	lola regulon network	Stat92E regulon network	Parp regulon network	nej regulon network	pdp 1 regulon network
wkd	CG11768	CG42788	CG16791	Atg17	CG34354	Atg17	CG31224	CG16791
Lerp	CG16791	CG16791	l(3)neo38	CG16791	l(3)neo38	unk	Alh	Cow
Octbeta1R	Alh	Alh	mod(mdg4)	Alh	rn	CG16791	l(3)neo38	klg
Dmtn	mAChR-B	RhoGAP93B	CG7029	l(3)neo38	trv	Cow	RhoGAP93B	eIF4G2
CG34353	rn	Cow	svp	pum	Fas1	Pzl	Cow	Syx1A
cic	osa	Pzl	kay	Nmdar1	Nrx-1	klg	eIF4G2	14-3-3epsilon
AdSS	sqz	mura	Dmtn	mura	Octbeta3R	rn	CG31522	gish
CG7694	nAChRalpha1	klg	gro	jigr1	Stat92E	Tsp97E	Dhap-at	osa
amon	mask	Ktl	CG4467	mAChR-B	CG15803	Syx1A	osa	Klp98A
Syp	cv-c	dpr5	CG16779	rn	LpR1	gish	Klp98A	svp
Jupiter	tinc	gish	Nrx-1	osa	Rim	mask	Rox8	Rox8
jvl	Hsc70-4	Task6	Snm1	beat-IIa	Ssdp	CG16779	CG14669	plum
AP-1sigma	CG14246	CG7029	VAChT	plx	CG31324	Octbeta2R	Octbeta1R	nAChRalpha1
CG42724	Stat92E	Hs6st	woc	CG7029	scrib	cic	Fas1	puc
dpr9	CG15803	trv	Sar1	svp	Rbp	Inx3	nAChRalpha1	CG34353
CG45263	CG42342	CG14669	CG17816	trv	CG42795	CG31140	puc	dpr17
l(3)L1231	Fur1	kay	CD98hc	Rox8	Dop1R2	pxb	bon	Atpalpha
Csk	5-HT2B	sqz	Cks85A	plum	CG5890	VAChT	RhoGAP100F	CG16779
CG10011	Rim	nAChRalpha1	mtd	CG34377	pros	glec	CG4467	Nrx-1
wts	CtBP	mask	CG5455	CG3744	Glut4EF	Tsp96F	faf	Octbeta2R
Tm1	Myo81F	puc	MTA1-like	Octbeta1R	EndoA	CG40411	cv-c	cic
CG5746	CG6051	wake	scrib	Fas1	heph	CG6154	Octbeta2R	Rad60
CG5768	mld	CG34353	slo	Pfdn5	CG42613	CG11873	CG34355	FeCH
RpL13A	tmod	faf	Glut4EF	CG9813	CG45050	trx	VAChT	Octbeta3R
Neurl4	tok	CG31191	CG31122	CG4467	Calx	pyd	glec	ctrip
unc-13-4A	btsz	CG16779	sqd	dpr17	Dscam2	CG42342	Cdep	CG5180
SsRbeta	CASK	cv-c	mfrn	CG31191	Rdl	dpr16	Tsp96F	glec
CG12038	Rbp	CG34355	EndoA	CG31221	CG12605	Gfrl	Parp	Parp
Aef1	dpr9	Octbeta3R	CG43102	cic	Con	Ssdp	fabp	Ptp99A
MYPT-75D	Dop1R1	pxb	Syn	CG34355	Tet	dsx	ps	cher
bmm	Dscam3	Ptp99A	Tpi	ctrip	sff	2mit	unc79	ps
Abl	slo	Pde6	alph	VAChT	CG8641	side	gpp	CG8031
fry	fru	Mical	Teh4	glec	CG7646	jvl	CG11873	Hmx
CG13315	beat-IV	crb	ND-39	Parp	bol	CG6051	B52	CG11873
CG32085	beat-VII	CG42322	Rdl	Ptp99A	nrm	ChAT	pyd	trx
mRpL12	Tm1	CG6154	CG43218	fabp	Dscam4	Vps33B	Syp	Syp
CG16711	sqd	Oamb	CG42674	ps	axo	kek6	CG6231	CG42342
CG13920	cpo	CG11873	mge	Sar1	CG5151	l(3)L1231	CG42342	Ssdp
CG33158	VhaPPA1-1	pyd	MEP-1	Cks85A	Corin	Dop1R2	Ssdp	msi
Set1	Efa6	Syp	CG13315	amon	CG30419	yrt	fkh	dsx
Taf4	PH4alphaNE1	CG42342	Argk	Oamb	fl(2)d	REPTOR	Dys	rin
Spn	CG31145	TyrR	Mrtf	bnl	Hr3	pros	CtBP	CG31324
gcl	Calx	SIFaR	chn	mtd	Drl-2	cno	side	jvl
Hr3	skd	CG8500	Eaf	CG11873	Vha44	Gdh	Ace	GluClalpha
CG11635	Su(Tpl)	sals	CG1648	B52	Sdc	fru	corto	RpL6
mam	Blimp-1	Ssdp	Mctp	Syp	p120ctn	cindr	Dop1R2	rdx
Ih	dpr6	msi	CG12391	CG5455	unc-104	sba	CG1090	Ace
kn	Ac78C	rin	p120ctn	CG2993	Elk	KrT95D	Rab11	ChAT
ttv	klar	CG31324	unc-104	CG8500	Rgk3	Cad87A	cno	CASK
Spred	PVRAP	sr	CG14478	Rim	cg	Teh1	CG9776	l(3)L1231
jeb	Con	Dys	CanB2	Ssdp	NAT1	Efa6	wts	REPTOR
Hsf	sfl	side	SLO2	msi	HmgZ	larp	CG34357	sima
aPKC	Pxn	jvl	SP2353	l(3)05822	Ih	Tim17b	tws	cno
CG2269	CG42324	Myo81F	CG1358	rin	psq	nsl1	lap	Glut4EF
CG10417	sty	GluClalpha	PCB	CG7956	PCB	heph	SKIP	Gdh
CG15312	CG42674	danr	Cyp317a1	T48	dpr21	nkd	hth	CG10011
Usp2	fz2	tmod	Stlk	sr	Mmp2	JIL-1	KrT95D	cindr
elav	msn	Ace	CG34219	Alg-2	lolal	CG6418	CG5746	beat-IV
rudhira	CG13917	btsz	Trpm	CtBP	Mef2	GluRIA	sqd	beat-VII
CG15772	sff	ChAT	jeb	side	rdgB	Dscam2	alpha-Man-IIb	KrT95D
Nep1	nmo	Rbp	mspo	MP1	dtn	CG17839	beat-VI	Tm1
CG14229	CG32373	CG45263	lola	Surf6	CanA-14F	CG14073	larp	beat-IIb
east	mub	CG11317	Khc-73	CG45049	su(w[a])	dpr6	heph	CG11837
hang	scyl	l(3)L1231	Ppa	jvl	RhoGAP19D	tral	Syn	Sap47
CG6867	dikar	CG42404	Fbl6	SNF4Agamma	elav	eIF5B	CG45050	Teh1
Crg-1	simj	sima	bi	GluClalpha	rudhira	CG12605	gb	beat-VI
zld	app	cno	CG3556	Snap24	fend	Aps	Hipk	dco
Ten-a	Ets65A	fru	Appl	Gprk2	Top1	tow	Su(Tpl)	heph
CG17841	bma	CG42402	GlcAT-I	danr	CG17065	CG32066	RpL10	Syn
dwg	FoxK	beat-IV	cac	eff	Crg-1	CG13293	Blimp-1	CG42613
hec	bru3	tws	CG8974	CG2003	Ca-alpha1T	MYPT-75D	dpr6	CG45050
ttm50	Mrtf	hth	CanA-14F	CASK	sgg	Pep	SP1173	Hipk
egh	Glut1	beat-VII	kdn	NK7.1	Frq2	chrb	CG14459	JIL-1
Moe	Sytbeta	CG13616	CG42240	Rbp	Hex-A	Shal	tral	skd
csw	Cyp12c1	Nlg3	Fur2	Meltrin	Myc	Fife	Mob2	mRpS5
CG2247	Src64B	Dad	SPR	CG45263	CG43736	Nedd4	ImpL2	Diap1
futsch	Spn	Teh1	CG17778	CG42795	Ran	Pdk1	RasGAP1	Dscam2
CG33181	CG42260	cpo	X11Lbeta	CG11317	ben	nAChRbeta1	PVRAP	CG32425
SK	Fili	beat-VI	bves	kek6	CkIalpha	ftz-f1	CG12605	CG17839
ec	Sema2b	DIP-gamma	Hers	Gycbeta100B	mnb	CG32206	CG6024	Blimp-1
dpr8	fl(2)d	CG11000	sno	CG34133	Tlk	Crtc	scro	Rbp6
drl	Mctp	heph	Adar	yrt	tty	Snap25	Con	ko
Slob	CG13954	CG42613	Frq2	REPTOR	CG12531	CG16711	CG42540	Mi-2
GABA-B-R1	Rho1	Calx	CG43689	CG5044	RpS5a	CG33993	tipE	CG13685
CG42784	Sdc	alph	egh	Gfat1	br	bma	DopEcR	CG12605
hoe2	CG17684	Hipk	nonA	slo	CG42346	FoxK	lqf	CG5910
milt	Rgk1	unc-13-4A	Dsp1	Glut4EF	CG4577	nudE	CG6628	siz
TfIIS	CG10384	nkd	para	Gdh	Slob	Gug	CG32066	DopEcR
Ret	Sobp	tna	eIF5	Rb97D	CG11319	Eip75B	CG42324	Eip63F-1
lilli	CG14478	Cip4	mnb	CG5466	Gdi	nuf	olf413	Pdp1
Wdr62	Not1	GluRIA	CG1737	beat-IV	eys	jim	rdgC	caps
bowl	tou	CG32425	CG32521	CG34357	Fas3	sif	Eip63E	scrt
smog	mim	Pka-R1	tty	tacc	CG15431	CG32264	chrb	olf413
ey	CG8405	GluRIB	CG12531	lap	CG4297	EcR	fz2	Eip63E
Arl4	Mid1	Ank2	trol	Mkk4	bsk	CG30419	CG43078	Sox21b
CG14050	wech	DnaJ-1	CG3655	Srp14	kek3	Fili	Abl	CG9951
	Lis-1	ND-39	CG14207	CG33203	brat	Sema2b	Shal	Unr
	par-1	dpr6	ct	hth	CG16854	Haspin	Shab	Abl
	CG30089	Ac78C	CG31694	beat-VII	robo2	CG12547	Tet	Shal
	Nipped-A	GlcAT-P	crp	KrT95D	nolo	chn	CG44837	msn
	Pka-R2	klar	smt3	Sap47	PDZ-GEF	shot	stv	Shab
	mbl	CG32137	cdc14	beat-VI	CG44153	sm	ND-MLRQ	Tet
	stj	Con	Dif	Tim17b	tai	Cbp53E	RhoGDI	CG44837
	MFS17	siz	CG5708	ETHR	dati	cora	orb2	Fife
	Mapmodulin	sfl	Shawl	EndoA	unc-13	dpr1	CG13917	orb2
	DAT	tipE	ND-15	CG14853	CaMKII	Sdc	ftz-f1	Rbfox1
	Spred	lqf	Rtnl1	Rpn9	Eph	jef	sff	Pdk1
	hrg	Lmpt	CG14535	nonA-l		hppy	nmo	nAChRbeta1
	sano	CG42324	Utx	Syt4		l(2)41Ab	enc	CG13917
	stan	CG13928	DIP-epsilon	Eip93F		Alk	Fhos	ftz-f1
	Trpm	scrt	CG31997	heph		Galphao	bab2	CG32369
	CAP	olf413	Thd1	CG45050		cg	CG32085	sff
	dpr21	rdgC	myo	Calx		tou	Hsp27	nmo
	dnr1	sty	Cadps	Hipk		CG15097	Crtc	Rdh
	mspo	Unr	CG10734	unc-13-4A		E(Pc)	DCP2	enc
	Rab3	msn	CG32581	CrebA		CG9005	Snap25	mirr
	CG13204	Shab		nkd		CG33155	scyl	shep
	Mef2	CG44837		tna		CG43066	akirin	Crtc
	CG15312	orb2		Teh2		wech	Atg1	Cbl
	Fas2	CG17233		mael		Nipped-B	Usp10	Snap25
	sdt	ftz-f1		Dscam2		SLO2	fwe	scyl
	ari-1	comm		CG13921		par-1	nrm	Atg1
	CG3638	sff		syd		rl	Set1	CycT
	HDAC4	nmo		CG1316		CG33144	Dscam4	simj
	CG45002	CG32085		Blimp-1		CG1358	Taf4	Syn1
	CG2861	corn		GluRIB		psq	ens	app
	CanA-14F	mub		Dab		Stlk	Rap1	CG32486
	CrebB	Argk		CG14073		NaCP60E	Mrtf	FoxK
	Sxl	Crtc		CG17454		Lac	Rgl	CG14830
	elav	emc		ND-39		ttv	Glut1	CG32432
	Fur2	CG14984		Rdl		stan	upSET	Hsc70Cb
	RpS14b	scyl		caup		lbk	CG17698	CG32333
	CG43759	Eip78C		Mbs		Prosap	Eip75B	CG42337
	nAChRalpha3	CG8641		tral		mspo	Ten-m	Rgl
	mgl	rgn		sNPF-R		Yeti	nuf	Gug
	Frq1	Syn1		AcCoAS		Gprk1	CG32264	Glut1
	dlg1	trio		foi		Mmp2	CG44836	CG17698
	CG8034	bma		GlcAT-P		Ppa	Tollo	Eip75B
	Smr	bol		PVRAP		luna	nwk	Ten-m
	Nmdar2	FoxK		CG12605		cv-2	Corin	nuf
	mahe	CG33523		scro		Ttd14	CG42260	CG5151
	CG32647	alphaTub67C		siz		CG43901	CG30419	sif
	Ten-a	bru3		sfl		Pdcd4	CG44247	dpr10
	CG44422	CG32432		CG42540		Tomosyn	chn	Ndfip
	sgg	Dscam4		tipE		Cyp4d1	shot	nwk
	sd	Sytbeta		DopEcR		CG42450	CG15236	Spn
	RhoGAPp190	sif		vtd		nocte	sm	Corin
	hec	Exn		Pdp1		l(1)G0320	RNASEK	CG42260
	Bx	CG30419		lqf		CG42339	pnut	Fili
	Dop2R	Sema2b		MED19		CG14435	Sdc	chn
	Hex-A	bic		Baldspot		Ubr3	unc-104	CG1688
	CG32700	CG1688		S6k		Ant2	CG14464	sm
	Mnt	Eaf		CG32066		e(r)	a	Cbp53E
	l(1)G0469	cora		CG13928		NetB	CG14478	Hr3
	rad	Pkc53E		CG13293		Evi5	hppy	uex
	CG43736	Rho1		rdgC		elav	Not1	dpr1
	nej	Sdc		Mkp3		rudhira	Kdm4B	CG13954
	alpha-Man-Ia	Rgk1		Eip63E		Nep1	tou	Sdc
	Flo2	KCNQ		chrb		CG34401	CG6329	CG17684
	NFAT	CG34370		SPoCk		CG6340	Su(z)2	unc-104
	kirre	Rgk3		Ccn		SPR	E(Pc)	Fs
	Pde9	gprs		fz2		nAChRalpha3	kcc	hppy
	dnc	cg		dpr20		Frq1	CG9005	Elk
	Tlk	blw		RpS4		slgA	jing	Kdm4B
	schlank	Su(z)2		Abl		CG7378	CG40498	cg
	LIMK1	CG43066		Shab		gce	CG43066	CG6329
	Sec16	ckn		Tet		Top1	Roc2	blw
	Imp	Ih		stv		Smr	ckn	E(Pc)
	CG32547	Pde8		Fife		Ca-alpha1T	Ih	kcc
	CG3655	Dhit		orb2		Nmdar2	Mid1	pdm3
	Nrg	Mid1		Nedd4		CG7326	zip	cer
	beta-Spec	CG30089		Rbfox1		shakB	wech	Scp1
	CG42340	5-HT1B		CkIIalpha		CG44422	CG9003	CG10543
	dpr8	CG12851		fwd		Ubr1	Lis-1	Ih
	Pde1c	Dyb		CG13917		Rbcn-3A	CG10082	Dhit
	Shaw	5-HT1A		Nca		CG11294	par-1	Mid1
	Slob	CngA		ftz-f1		CG32772	magu	wech
	kek1	CG42663		CG32369		sgg	Nipped-A	par-1
	cact	mbl		ND-AGGG		CG1677	phyl	5-HT1B
	Pka-C1	Drep2		p130CAS		hiw	ena	rl
	Nlg2	px		sff		sd	psq	ths
	kuz	Stlk		nmo		Amun	mbl	psq
	CG10189	Liprin-gamma		BtbVII		RhoGAPp190	Drep2	px
	bun	CG30105		CG42268		Frq2	Liprin-gamma	Stlk
	CG31760	Mapmodulin		enc		pico	CG5065	Liprin-gamma
	Dif	coro		Nc73EF		Pp2C1	ap	sli
	CG15431	EDTP		CG32085		CG32815	igl	sbb
	Cyp4e3	Dscam1		corn		nAChRalpha7	Dscam1	fra
	Piezo	Spred		Crtc		Dd	Lac	Camta
	nAChRalpha6	Trpm		Eip78C		unc-119	Spred	jeb
	Nos	jeb		dikar		Flo2	sbb	MESK2
	brat	MESK2		CycT		CG32767	Camta	lbk
	grp	lbk		CG7646		CG43737	CG10139	Prosap
	Pvf3	Cul1		rgn		Moe	CG15107	unc-5
	Akap200	CG33143		CG16711		Ptpmeg2	jeb	CG13739
	tup	Prosap		Ptpmeg		ben	MESK2	Zasp52
	Ddr	Pal2		yps		mnb	CG13168	Gprk1
	CG42238	mspo		Usp10		Tlk	CG33774	lola
	ab	Mmp2		app		eag	CG42392	Khc-73
	ed	CG8910		trio		Marf	Hdc	aPKC
	Shawl	hts		qm		Nna1	lola	CG43902
	lilli	Ppa		bol		CG11122	Ppa	Pdcd4
	CG14535	aPKC		nAChRalpha4		Ptp10D	aPKC	CG15312
	nAChRalpha5	Mef2		FoxK		CG3655	d4	rdgB
	Asator	CG43902		CG14830		disco	pcs	l(1)G0289
		bi		nrm		CHES-1-like	Pdcd4	hep
		CG43347		CG10469		CG43867	Appl	ari-1
		l(1)G0289		CG13895		ct	rdgB	HDAC4
		sdt		CG32432		CLIP-190	pigs	AMPdeam
		hep		Dscam4		Fs(2)Ket	dtn	nocte
		Act5C		Mrtf		chinmo	CG3638	mei-P26
		CG1504		Gug		cact	DAAM	CanA-14F
		CG7990		upSET		CG43861	nocte	Ubr3
		HDAC4		CG17698		Caper	Syt12	RunxB
		Hmt4-20		Eip75B		Nlg2	CG42339	Sxl
		CG43658		jim		Lar	CanA-14F	Vap33
		Nup153		CG5151		kuz	CrebB	Evi5
		rudhira		Sytbeta		CG9171	Evi5	CG43658
		CG34401		sif		beat-IIIc	CG43658	Tao
		CG43759		trn		Rab14	RhoGAP19D	RhoGAP19D
		rut		Src64B		CG4587	elav	elav
		mgl		CG42831		lid	Chc	rudhira
		Frq1		CG9368		kek3	rudhira	Hk
		PhKgamma		QIL1		CG4168	Nep1	CG34401
		CG7378		nwk		Nckx30C	fend	CG6340
		CG8034		Corin		RpL13	CG34401	nAChRalpha3
		Hsc70-3		EcR		ed	CG6340	sesB
		Nmdar2		CG41520		Gsc	east	flw
		mahe		bin3		CG31769	hang	slgA
		bves		Sema2b		Wdr62	nAChRalpha3	LPCAT
		CG32647		Haspin		CG9328	sesB	CG32532
		shakB		AGO1		CG5888	mgl	Smr
		C3G		chn		RapGAP1	LPCAT	X11Lbeta
		CG44422		MESR4		tutl	CG6867	mahe
		Scgdelta		shot		tai	dlg1	Hers
		Idgf4		CG15236		Snoo	Smr	CG2258
		CG32772		LRR		numb	Ca-alpha1T	CG32647
		sgg		sm		Thd1	Nmdar2	CG14441
		CG7766		Hr3		CG43163	mahe	Rbcn-3A
		sd		uex		CG15239	wapl	Fim
		Amun		Sara		CG32712	Hers	inaE
		CG32813		Vha44			Ten-a	sgg
		hec		Syngr			CG32687	CG1677
		Atg8a		CG13954			shakB	sno
		Bx		Rho1			Pp2B-14D	hiw
		CG32700		gus			CG44422	Amun
		rdgA		Taldo			Fim	RhoGAPp190
		RpS15Aa		CG17684			sgg	Frq2
		CG32683		Ehbp1			CG42258	Pp2C1
		rad		p120ctn			Amun	nAChRalpha7
		CG2865		LRP1			RhoGAPp190	Mnt
		RSG7		unc-104			Pp2C1	CG5062
		alpha-Man-Ia		CG14464			CG43313	CG12206
		Flo2		CG14478			Mnt	unc-119
		RpL7A		jef			Myc	CG2865
		CG43737		betaTub56D			nej	egh
		fz4		RpLP0-like			CG32767	spri
		wap		Not1			RpL7A	RSG7
		CG3726		CG34370			CG3726	CG43736
		kirre		Dh44-R2			Rbp1-like	Dsp1
		dnc		Psi			futsch	alpha-Man-Ia
		CanB		Galphao			CG1636	Yp3
		HERC2		Kdm4B			mnb	CG42594
		norpA		cg			CG15459	His3.3B
		eag		tou			HERC2	CG32767
		LIMK1		CG15097			Usp7	if
		Atg5		CG30158			fs(1)h	Smox
		Sec16		NAT1			Sec16	kirre
		CG15765		CG9005			CG42699	CG6123
		Imp		RabX1			CG12730	Pde9
		CG32547		CG40191			SK	Ptpmeg2
		ec		CG8441			UbcE2H	CkIalpha
		IntS6		jing			ec	mys
		Nrg		CG40498			CG15894	CG9650
		Trf2		CG30428			br	mnb
		CHES-1-like		CG10543			Nrg	Tlk
		CG42340		ckn			CHES-1-like	Him
		w		Ih			CG43867	norpA
		CG11103		CG13743			ct	CG33181
		CG1578		CG12926			pod1	eag
		mamo		qvr			dpr8	Drak
		pod1		Mid1			X11L	Trf4-1
		Cngl		wech			beat-Ib	inaF-D
		CG4577		Nipped-B			Pde1c	Marf
		Pde1c		SLO2			Slob	CG1695
		Plc21C		Lis-1			PRL-1	SK
		CG32982		CG10082			chinmo	CG11122
		Slob		HmgD			wry	UbcE2H
		CG6700		Rme-8			Ca-alpha1D	Tob
		wry		5-HT1B			cact	e(y)3
		kek1		Rif1			Msp300	Trf2
		cact		Galphas			Pde11	CHES-1-like
		Pka-C1		ths			crp	CG42340
		Msp300		Cirl			RFeSP	Ac13E
		Nlg2		5-HT1A			Lar	AP-1gamma
		Hr38		CG33144			sick	CG43867
		CG11319		ena			CadN	ct
		CadN		sxc			CG42784	CG42346
		CG42784		psq			CG33298	Rbp9
		kuz		CG3107			Cyt-c-p	chinmo
		bru2		PCB			eys	GABA-B-R1
		CG43232		CG30116			toc	Msp300
		eys		Lpin			CdGAPr	Caper
		bun		Cyp317a1			Rab14	C1GalTA
		rk		px			CG42750	Nlg2
		CG31760		Ipk1			vri	beat-Ic
		Sema1a		Hs3st-A			CG13689	sick
		CG4587		Stlk			fred	CadN
		Dif		CG14762			cdc14	robo3
		CG15431		MFS17			CG4587	Cyt-c-p
		fok		robo1			Dif	milt
		CG13784		stau			Tim23	nrv3
		Piezo		Atf6			CG15431	B4
		nAChRalpha6		Dscam1			Drgx	bun
		CG33090		Acp53C14c			CG43778	CG42750
		kek3		Jra			CG15390	CG31760
		E23		CG8726			H15	fred
		brat		drk			Syt1	cdc14
		ush		ttv			CG31637	CG31808
		ab		CG30389			grp	beat-IIIb
		salm		sbb			Pvf3	Syt1
		Cf2		Dg			CG17211	kek3
		ed		Trpm			drm	Trp1
		her		MESK2			tup	brat
		dac		dpr21			Cf2	grp
		Bsg		robl			Gpb5	Pvf3
		Rtnl1		Gprk1			lilli	CG17321
		CG13995		Hen1			CG17124	drm
		sNPF		Epac			Bsg	Akap200
		capu		Rab3			Cka	Nckx30C
		RapGAP1		lola			CG9328	CG42238
		VGlut		hts			VGlut	Hrb27C
		numb		lolal			tutl	Ggamma30A
		Thd1		CG13204			chic	Cf2
		CG3339		aPKC			mts	CG4438
		CG34188		luna			Snoo	lilli
		CG31337		Drat			Oli	Gsc
				CG9170			kis	Wdr62
				CG43902			CG10019	SoxN
				Grip			CG31997	sky
				Appl			Cadps	Lim3
				rdgB			Gyf	Dyrk2
				Usp2			Eph	capu
				Rcd-1			Pur-alpha	RapGAP1
				pigs			CG32655	tai
				CG1504				smog
				CG42450				mts
				dtn				Rab5
				CG42541				osp
				Sec22				Snoo
				ssx				kis
				AMPdeam				Thd1
				CG43740				Notum
				mei-P26				dpn
				CG42339
				CanA-14F
				kdn
				Sxl
				e(r)
				Hmt4-20
				NetB
				Cyp1
				RhoGAP19D
				stx
				elav
				rudhira
				tay
				Hk
				fend
				vnd
				CG34401
				east
				SPR
				nAChRalpha3
				mgl
				Frq1
				wcy
				flw
				slgA
				CG3198
				CG7378
				gce
				Vsx1
				Top1
				CG17065
				Smr
				X11Lbeta
				Hsc70-3
				Tbh
				acj6
				Zw
				mahe
				zld
				bves
				Hers
				shakB
				Pp2B-14D
				CG17841
				C3G
				Rbcn-3A
				inaE
				2023-09-01
				CG1677
				sno
				Adar
				CG6227
				ph-p
				RhoGAPp190
				exd
				CG32815
				Mnt
				CCKLR-17D3
				slpr
				Myc
				Dd
				Mvb12
				CG2865
				RSG7
				CG43736
				Dsp1
				nej
				Pfrx
				bif
				para
				CG42594
				CG32767
				Pmp70
				NFAT
				CG43737
				Moe
				Rbp1-like
				kirre
				Pde9
				Lim1
				Ptpmeg2
				CkIalpha
				futsch
				be
				Tlk
				Him
				Nep3
				schlank
				norpA
				CG33181
				eag
				LIMK1
				tyf
				prage
				fs(1)h
				tty
				CG1695
				CG14234
				CG12531
				UbcE2H
				RpS5a
				CG32547
				sun
				CG15894
				CG4678
				Nrg
				Trf2
				CHES-1-like
				svr
				CG42346
				Rip11
				Pde1c
				Rbp9
				wry
				Ca-alpha1D
				cact
				net
				crp
				Nlg2
				CG1416
				Lar
				bchs
				Pvr
				sick
				Gdi
				Cnot4
				CadN
				Tif-IA
				CG12194
				vig
				CG9171
				REPTOR-BP
				bru2
				dpr19
				CG4455
				CG5828
				nrv3
				CG31688
				B4
				CG2225
				CG43850
				CG42750
				smt3
				x16
				CG17493
				Sema1a
				cdc14
				CG4587
				Dif
				CG15431
				CG17646
				Lsp1beta
				beat-IIIb
				IA-2
				CG42748
				CG8671
				dpr3
				Zir
				Syt1
				Ptp36E
				CG34393
				bsk
				emb
				grp
				CG17211
				Atet
				Akap200
				FASN1
				Nckx30C
				CG42238
				Sec71
				hoe1
				CG13124
				Cf2
				CG31935
				dac
				SoxN
				sky
				CG17124
				Bsg
				CG14535
				nolo
				pim
				PDZ-GEF
				tutl
				chic
				tai
				Rab5
				osp
				Snoo
				kis
				numb
				CG10019
				CG11030
				dati
				CG11360
				Actbeta
				NfI
				pan
				Syt7
				onecut
				CaMKII
				bip2
				CG11155
				CG33521
				RhoGAP102A
				PMCA
				PlexA
				pho
				Zyx
				Hcf
				Dyrk3
				Ephrin
				CaMKI
				Eph
				Cals
				Slip1
				CG32017
				MED26
				Pur-alpha
				CG42753
				CG32581
				dysf
